# Supplementary material
Source: publisher figshare collection journal article supplement (https://diabetesjournals.figshare.com/articles/dataset/_/16828255)
Supplement: Supplementary file 1 [file 1]

## Sheet: Supple Table 3_NMD
GeneID	Gene Symbol	GENE NAME	chr	strand	transcript_inferred	length_transcript	length_transcript_intronsertCDS	distance_PtcToExon-ExonBoundary	NMD_sensitive	riExonStart_0base	riExonEnd	upstreamES	upstreamEE	downstreamES	downstreamEE	PValue	FDR	IncLevel_Cyto	IncLevel_Cont	IncLevelDifference_CytvsCon
ENSG00000137497	NUMA1	nuclear mitotic apparatus protein 1	11	-	ENST00000393695	6345	5289	1047	Yes	71718234	71719891	71718234	71718481	71719733	71719891	8.37774e-149	1.28654e-145	0.411,0.33,0.389,0.355,0.405,0.601,0.37,0.433,0.305,0.416	0.121,0.09,0.119,0.107,0.117,0.324,0.17,0.107,0.154,0.115	0.259
ENSG00000186815	TPCN1	two pore segment channel 1	12	+	ENST00000550785	2664	2070	480	Yes	113725967	113726652	113725967	113726039	113726562	113726652	3.58735e-72	1.83632e-69	0.143,0.034,0.241,0.081,0.043,0.043,0.2,0.158,0.222,0.101	0.143,0.073,0.5,0.163,0.143,NA,0.28,0.277,0.476,0.151	-0.119
ENSG00000099251	HSD17B7P2	hydroxysteroid 17-beta dehydrogenase 7 pseudogene 2	10	+	N/A	N/A	N/A	N/A	N/A	38654361	38654557	38654361	38654544	38654545	38654557	1.43294e-68	6.00142e-66	0.675,0.732,0.791,0.667,0.474,0.761,0.827,0.881,0.899,0.821	0.095,0.0,0.154,0.333,0.091,NA,0.217,0.364,0.429,0.417	0.519
ENSG00000149091	DGKZ	diacylglycerol kinase zeta	11	+	ENST00000454345	3351	3138	99	Yes	46400752	46401118	46400752	46400786	46401018	46401118	3.59742e-36	6.37434e-34	0.207,0.271,0.282,0.295,0.205,0.279,0.297,0.181,0.27,0.274	0.154,0.111,0.084,0.164,0.089,0.099,0.166,0.127,0.121,0.106	0.134
ENSG00000176444	CLK2	CDC like kinase 2	1	-	ENST00000368361	1497	1335	-18	No	155233740	155234341	155233740	155233831	155234258	155234341	3.12512e-25	4.23454e-23	0.692,1.0,1.0,0.818,1.0,1.0,0.576,1.0,0.667,1.0	1.0,1.0,1.0,1.0,1.0,1.0,0.818,1.0,1.0,1.0	-0.107
ENSG00000234745	HLA-B	major histocompatibility complex, class I, B	6	-	ENST00000412585	1086	348	697	Yes	31323943	31324734	31323943	31324219	31324464	31324734	1.15668e-22	1.26877e-20	0.008,0.012,0.087,0.089,0.469,0.005,1.0,0.042,1.0,0.017	0.0,0.013,0.087,0.089,0.466,0.0,NA,0.05,0.5,0.02	0.137
ENSG00000100911	PSME2	proteasome activator subunit 2	14	-	N/A	N/A	N/A	N/A	N/A	24614918	24615449	24614918	24615105	24615416	24615449	9.92704e-20	9.52789e-18	0.234,0.223,0.284,0.37,0.235,0.323,0.329,0.277,0.329,0.25	0.208,0.377,0.296,0.574,0.243,1.0,0.478,0.429,0.655,0.481	-0.189
ENSG00000166471	TMEM41B	transmembrane protein 41B	11	-	N/A	N/A	N/A	N/A	N/A	9302200	9305140	9302200	9302588	9304917	9305140	7.59867e-19	6.73213e-17	0.134,0.593,0.515,0.756,1.0,0.621,0.613,0.667,0.613,0.76	0.511,0.727,0.75,0.636,0.697,1.0,0.786,0.692,0.8,0.926	-0.125
ENSG00000148362	C9orf142	chromosome 9 open reading frame 142	9	+	N/A	N/A	N/A	N/A	N/A	139887091	139887695	139887091	139887152	139887376	139887695	4.39123e-12	2.22312e-10	0.368,0.167,0.294,0.232,0.229,0.351,0.296,0.286,0.317,0.202	0.517,0.137,0.401,0.2,0.198,1.0,0.268,0.325,0.433,0.284	-0.102
ENSG00000156531	PHF6	PHD finger protein 6	X	+	N/A	N/A	N/A	N/A	N/A	133559230	133562819	133559230	133559360	133559690	133562819	6.44283e-12	3.15767e-10	0.116,0.25,0.357,0.231,0.2,0.053,0.212,0.25,0.174,0.172	0.1,0.429,0.257,0.185,0.556,1.0,0.448,0.283,0.4,0.13	-0.177
ENSG00000157625	TAB3	TGF-beta activated kinase 1/MAP3K7 binding protein 3	X	-	ENST00000288422	2136	1824	166	Yes	30861082	30864761	30861082	30861166	30864667	30864761	3.39184e-09	1.33557e-07	0.0,0.0,0.063,0.097,0.0,0.0,0.083,0.049,0.07,0.086	0.154,0.037,0.209,0.185,0.0,1.0,0.143,0.091,0.0,0.067	-0.144
ENSG00000164620	RELL2	RELT like 2	5	+	N/A	N/A	N/A	N/A	N/A	141016516	141017976	141016516	141017308	141017736	141017976	4.55381e-09	1.76298e-07	0.097,0.211,0.158,0.19,0.216,0.724,0.286,0.246,0.2,0.208	0.111,0.171,0.122,0.214,0.13,0.0,0.245,0.133,0.116,0.193	0.11
ENSG00000205560	CPT1B	carnitine palmitoyltransferase 1B	22	-	ENST00000312108	2316	1830	405	Yes	51009586	51009968	51009586	51009721	51009803	51009968	9.91452e-09	3.59655e-07	0.1,0.364,0.692,0.909,0.245,0.481,0.273,0.333,0.235,0.417	0.064,0.412,0.333,0.375,0.154,0.0,0.2,0.381,0.036,0.137	0.196
ENSG00000204256	BRD2	bromodomain containing 2	6	+	N/A	N/A	N/A	N/A	N/A	32944338	32945347	32944338	32944713	32945036	32945347	8.20434e-08	2.64317e-06	0.763,0.784,0.837,0.793,0.818,0.6,0.736,0.714,0.75,0.765	0.878,0.85,0.867,0.805,0.846,1.0,1.0,0.879,0.931,0.86	-0.136
ENSG00000120549	KIAA1217	KIAA1217	10	+	ENST00000376454	5829	5346	-12	No	24833909	24836772	24833909	24834032	24834755	24836772	1.1726e-06	3.14079e-05	0.509,0.32,0.413,0.258,0.368,0.625,0.283,0.5,0.358,0.404	0.545,0.318,0.391,0.447,0.5,0.619,0.472,0.632,0.644,0.622	-0.115
ENSG00000007372	PAX6	paired box 6	11	-	ENST00000379115	1308	120	1105	Yes	31823108	31828010	31823108	31823324	31827949	31828010	1.40673e-06	3.7246e-05	0.455,0.905,0.929,0.833,0.939,1.0,0.755,0.851,0.754,0.91	0.579,0.833,0.644,0.639,0.75,0.0,0.705,0.656,0.68,0.793	0.205
ENSG00000102901	CENPT	centromere protein T	16	-	N/A	N/A	N/A	N/A	N/A	67863667	67865261	67863667	67864451	67865118	67865261	1.67696e-06	4.28477e-05	0.172,0.125,0.133,0.05,0.132,0.429,0.162,0.077,0.28,0.191	0.333,0.225,0.167,0.246,0.243,0.692,0.211,0.176,0.27,0.205	-0.102
ENSG00000187994	RINL	Ras and Rab interactor like	19	-	N/A	N/A	N/A	N/A	N/A	39366970	39367421	39366970	39367114	39367332	39367421	2.17781e-05	0.00044302	1.0,1.0,0.619,0.333,1.0,NA,0.833,0.875,0.862,0.765	0.778,1.0,0.368,0.478,0.091,NA,1.0,1.0,1.0,0.579	0.11
ENSG00000182325	FBXL6	F-box and leucine rich repeat protein 6	8	-	ENST00000331890	1617	1074	398	Yes	145579959	145580373	145579959	145580191	145580259	145580373	2.8245e-05	0.000538915	0.344,0.189,0.042,0.11,0.11,0.0,0.08,0.099,0.042,0.095	0.259,0.057,0.31,0.178,0.058,0.84,0.077,0.239,0.099,0.196	-0.12
ENSG00000107185	RGP1	RGP1 homolog, RAB6A GEF complex partner 1	9	+	ENST00000456972	1293	462	610	Yes	35750654	35750986	35750654	35750738	35750836	35750986	3.43457e-05	0.000625417	0.04,0.037,0.085,0.018,0.114,0.111,0.062,0.103,0.119,0.075	0.069,0.091,0.14,0.1,0.0,0.857,0.2,0.064,0.143,0.129	-0.103
ENSG00000167965	MLST8	MTOR associated protein, LST8 homolog	16	+	ENST00000562352	825	195	521	Yes	2256358	2256660	2256358	2256410	2256479	2256660	3.61246e-05	0.000652651	0.303,0.13,0.62,1.0,0.735,0.938,0.51,0.816,0.439,0.696	0.534,0.807,1.0,0.91,0.796,0.148,0.747,1.0,0.559,0.829	-0.114
ENSG00000149809	TM7SF2	transmembrane 7 superfamily member 2	11	+	ENST00000279263	1254	1188	-92	No	64882384	64883070	64882384	64882553	64882947	64883070	4.3141e-05	0.000756137	0.4,0.319,0.324,0.388,0.421,0.407,0.421,0.25,0.277,0.467	0.538,0.559,0.467,0.419,0.405,NA,0.617,0.714,0.405,0.522	-0.149
ENSG00000167380	ZNF226	zinc finger protein 226	19	+	N/A	N/A	N/A	N/A	N/A	44669740	44669960	44669740	44669766	44669909	44669960	4.68937e-05	0.000800146	0.582,0.778,0.574,0.933,0.889,1.0,0.538,0.529,0.931,0.688	0.717,0.829,0.889,0.756,0.867,1.0,0.895,1.0,0.889,0.789	-0.119
ENSG00000100889	PCK2	phosphoenolpyruvate carboxykinase 2, mitochondrial	14	+	N/A	N/A	N/A	N/A	N/A	24563519	24564054	24563519	24563643	24563974	24564054	4.91033e-05	0.000825617	0.857,1.0,0.563,0.333,0.529,1.0,0.917,0.727,0.6,0.641	1.0,0.5,0.886,0.667,1.0,NA,0.778,0.778,1.0,0.902	-0.118
ENSG00000110888	CAPRIN2	caprin family member 2	12	-	ENST00000395805	2715	2391	256	Yes	30867892	30869610	30867892	30868015	30869441	30869610	8.40392e-05	0.0012694	0.818,1.0,1.0,1.0,0.875,1.0,0.852,0.9,0.833,0.6	1.0,0.667,0.636,0.826,0.333,1.0,0.733,1.0,0.615,0.583	0.149
ENSG00000204632	HLA-G	major histocompatibility complex, class I, G	6	+	ENST00000376828	1029	972	55	Yes	29797194	29797709	29797194	29797470	29797592	29797709	0.000113394	0.00162743	NA,0.083,0.075,0.059,0.014,0.041,0.063,0.014,0.108,0.096	0.091,0.074,0.0,0.091,0.036,0.714,0.0,0.545,0.0,0.158	-0.109
ENSG00000177728	KIAA0195	transmembrane protein 94	17	+	ENST00000375248	4098	417	3611	Yes	73481951	73482507	73481951	73482079	73482370	73482507	0.000127244	0.00180929	0.273,0.333,0.161,0.5,0.13,NA,0.069,0.098,0.097,0.143	0.067,0.037,0.0,0.048,0.048,NA,0.12,0.0,0.0,0.123	0.151
ENSG00000008513	ST3GAL1	ST3 beta-galactoside alpha-2,3-sialyltransferase 1	8	-	N/A	N/A	N/A	N/A	N/A	134487961	134488843	134487961	134488317	134488520	134488843	0.000235416	0.00308334	0.115,0.24,0.385,0.2,0.2,NA,0.417,0.229,0.278,0.478	0.247,0.5,0.415,0.2,0.4,NA,0.769,0.22,0.579,0.333	-0.125
ENSG00000158806	NPM2	nucleophosmin/nucleoplasmin 2	8	+	N/A	N/A	N/A	N/A	N/A	21882234	21882817	21882234	21882341	21882726	21882817	0.000254819	0.00328837	0.949,0.733,0.595,0.583,0.748,0.726,0.576,0.742,0.762,0.642	1.0,0.753,0.776,0.728,0.778,1.0,0.758,0.759,0.719,0.784	-0.1
ENSG00000135775	COG2	component of oligomeric golgi complex 2	1	+	ENST00000366669	2214	822	1293	Yes	230805101	230807386	230805101	230805281	230807261	230807386	0.000563942	0.00646288	0.069,0.054,0.064,0.057,0.041,0.172,0.069,0.06,0.034,0.077	0.078,0.105,0.12,0.065,0.029,1.0,0.118,0.075,0.06,0.076	-0.103
ENSG00000084774	CAD	carbamoyl-phosphate synthetase 2, aspartate transcarbamylase, and dihydroorotase	2	+	ENST00000264705	6675	3252	3323	Yes	27456179	27456676	27456179	27456404	27456493	27456676	0.000992678	0.0103468	0.191,0.111,0.2,0.2,0.13,1.0,0.13,0.0,0.059,0.032	0.07,0.0,0.122,0.0,0.2,0.0,0.018,0.016,0.0,0.079	0.155
ENSG00000114388	NPRL2	NPR2-like, GATOR1 complex subunit	3	-	N/A	N/A	N/A	N/A	N/A	50386816	50387259	50386816	50386921	50387095	50387259	0.000990936	0.0103468	0.882,0.909,0.762,0.905,0.933,1.0,1.0,0.913,0.762,0.946	0.579,0.81,0.647,0.767,0.73,NA,0.583,0.931,0.81,0.8	0.162
ENSG00000171877	FRMD5	FERM domain containing 5	15	-	N/A	N/A	N/A	N/A	N/A	44165472	44166660	44165472	44166137	44166316	44166660	0.00120993	0.0121177	0.714,0.818,0.818,1.0,0.778,NA,1.0,0.2,0.579,1.0	0.765,0.68,1.0,0.933,1.0,NA,1.0,1.0,0.867,1.0	-0.149
ENSG00000188283	ZNF383	zinc finger protein 383	19	+	ENST00000589413	1425	228	4	No	37726450	37726976	37726450	37726577	37726880	37726976	0.00122951	0.0122605	0.309,0.143,0.086,0.111,0.0,0.0,0.125,0.059,0.103,0.118	0.29,0.368,0.455,0.2,0.273,1.0,0.1,0.188,0.077,0.097	-0.199
ENSG00000102225	CDK16	cyclin dependent kinase 16	X	+	ENST00000523344	780	513	232	Yes	47086392	47086622	47086392	47086498	47086558	47086622	0.00129396	0.0128753	0.625,1.0,0.527,0.879,0.707,0.769,0.69,0.796,1.0,0.754	0.796,0.597,0.661,0.389,0.69,0.389,0.848,0.848,0.455,0.527	0.155
ENSG00000182325	FBXL6	F-box and leucine rich repeat protein 6	8	-	ENST00000455319	1599	672	782	Yes	145580649	145581162	145580649	145580781	145581116	145581162	0.00187637	0.017714	0.333,0.867,0.294,0.5,0.75,1.0,0.931,0.7,0.765,1.0	1.0,0.833,1.0,0.778,0.655,NA,0.926,1.0,1.0,0.652	-0.158
ENSG00000132017	DCAF15	DDB1 and CUL4 associated factor 15	19	+	ENST00000254337	1800	1632	115	Yes	14071098	14071392	14071098	14071203	14071276	14071392	0.00216416	0.0197613	0.078,0.176,0.179,0.083,0.106,0.102,0.149,0.126,0.115,0.094	0.186,0.14,0.122,0.136,0.192,1.0,0.066,0.158,0.182,0.128	-0.11
ENSG00000120509	PDZD11	PDZ domain containing 11	X	-	N/A	N/A	N/A	N/A	N/A	69509104	69509443	69509104	69509204	69509371	69509443	0.00495982	0.0390596	0.25,0.206,0.205,0.236,0.192,1.0,0.2,0.292,0.279,0.37	0.154,0.244,0.125,0.148,0.333,0.0,0.24,0.22,0.089,0.341	0.134
ENSG00000165795	NDRG2	NDRG family member 2	14	-	ENST00000298687	1113	837	112	Yes	21486362	21486973	21486362	21486398	21486921	21486973	0.00577562	0.0439189	0.5,0.862,0.818,0.813,1.0,1.0,0.778,0.818,0.65,0.667	0.692,1.0,0.875,0.871,1.0,1.0,0.892,0.818,0.852,0.931	-0.103
ENSG00000142910	TINAGL1	tubulointerstitial nephritis antigen like 1	1	+	ENST00000271064	1401	1140	123	Yes	32051040	32052356	32051040	32051086	32052310	32052356	0.00662952	0.0491032	1.0,0.538,0.571,0.25,0.2,0.333,0.481,0.714,0.4,0.538	1.0,0.644,0.758,0.457,0.509,1.0,0.532,0.282,0.458,0.5	-0.112

## Sheet: Supple Table 5_ExonImpact
GeneID	Gene Symbol	APPRIS_Transcript	APPRIS_CCDS	APPRIS_Principal Isoform	chr	strand	IncLevel_Cyto	IncLevel_Cont	IncLevelDifference_CytovsCont	PValue	FDR	AS_ID	transcript_id	disease_probability	phylop	ss_1	ss_2	ss_3	ss_4	ss_5	ss_6	ss_7	ss_8	ss_9	ss_10	ss_11	ss_12	asa_1	asa_2	asa_3	disorder_1	disorder_2	disorder_3	disorder_4	disorder_5	disorder_6	disorder_7	disorder_8	disorder_9	disorder_10	disorder_11	disorder_12	pfam1	pfam2	ptm	type
ENSG00000108854	SMURF2	NA	NA	NA	17	-	0.712,0.822,0.692,0.598,1.0,1.0,1.0,0.708,1.0,0.708	1.0,1.0,0.933,0.665,1.0,NA,1.0,1.0,1.0,1.0	-0.131	1.48e-12	1.27e-10	chr17:62657947:62658186:-@chr17:62602720:62602758:-@chr17:62594500:62594608:-	ENST00000578386	0.91	0.469	0.919	0.511	0.727	0.242	0.038	0.919	0.506	0.054	0.817	0.252	0.027	0.627	22.886	2.968	50	0.101	0.211	0	0.128	0	0	1	0	0	1	1	0.128	1	0.255	0	SE
ENSG00000155329	ZCCHC10	NA	NA	NA	5	-	0.279,0.605,0.452,0.657,0.615,0.545,0.571,0.458,0.364,0.499	0.45,0.575,0.328,0.627,0.68,1.0,0.638,0.522,0.625,0.676	-0.108	0.000139	0.00316	chr5:132362189:132362237:-@chr5:132358533:132358598:-@chr5:132342451:132342612:-	ENST00000504170	0.87	0.341	0.929	0.477	0.736	0.396	0.04	0.929	0.489	0.047	0.856	0.115	0.024	0.655	22.556	5.238	58.316	0.09	0.204	0	0.12	0	0	1	0	0	1	1	0.12	0	0	0	SE
ENSG00000189292	FAM150B	NA	NA	NA	2	-	1.0,0.897,1.0,1.0,0.811,0.814,0.836,0.909,0.824,0.913	1.0,0.829,1.0,0.892,0.92,0.407,0.652,1.0,0.565,0.706	0.103	0.00125	0.0224	chr2:286290:286343:-@chr2:286123:286203:-@chr2:283111:283175:-	ENST00000401503	0.87	0.338	0.933	0.372	0.704	0.117	0.024	0.562	0.58	0.044	0.899	0.302	0.059	0.933	26.476	5.926	65.241	0.098	0.507	0.507	0.158	1	1	0.964	0.036	0.036	0.964	0.964	0.17	1	0.491	0	SE
ENSG00000189292	FAM150B	NA	NA	NA	2	-	1.0,0.897,1.0,1.0,0.811,0.814,0.836,0.909,0.824,0.913	1.0,0.829,1.0,0.892,0.92,0.407,0.652,1.0,0.565,0.706	0.103	0.00125	0.0224	chr2:286290:286343:-@chr2:286123:286203:-@chr2:283111:283175:-	ENST00000405290	0.87	0.338	0.934	0.38	0.705	0.116	0.024	0.554	0.579	0.043	0.899	0.305	0.058	0.934	26.518	5.926	65.241	0.098	0.507	0.507	0.157	1	1	0.964	0.036	0.036	0.964	0.964	0.17	1	0.491	0	SE
ENSG00000189292	FAM150B	NA	NA	NA	2	-	1.0,0.897,1.0,1.0,0.811,0.814,0.836,0.909,0.824,0.913	1.0,0.829,1.0,0.892,0.92,0.407,0.652,1.0,0.565,0.706	0.103	0.00125	0.0224	chr2:286290:286343:-@chr2:286123:286203:-@chr2:283111:283175:-	ENST00000344414	0.87	0.338	0.934	0.38	0.705	0.116	0.024	0.554	0.579	0.043	0.899	0.305	0.058	0.934	26.518	5.926	65.241	0.098	0.507	0.507	0.157	1	1	0.964	0.036	0.036	0.964	0.964	0.17	1	0.491	0	SE
ENSG00000144741	SLC25A26	ENST00000354883	CCDS2905.2	PRINCIPAL:1	3	+	0.657,0.714,0.65,0.778,0.895,1.0,0.857,0.667,0.6,1.0	0.676,0.846,1.0,1.0,1.0,1.0,1.0,1.0,0.846,0.947	-0.15	4.87e-11	3.68e-09	chr3:66271168:66271553:+@chr3:66286968:66287124:+@chr3:66312475:66312579:+	ENST00000354883	0.84	0.409	0.95	0.493	0.816	0.027	0.017	0.098	0.397	0.032	0.902	0.576	0.063	0.95	16.668	3.391	66.5	0.102	0.504	0.504	0.146	1	1	0.981	0.019	0.019	0.981	0.981	0.152	0.547	0.829	0	SE
ENSG00000067082	KLF6	ENST00000497571	CCDS7060.1	PRINCIPAL:1	10	-	0.992,0.955,0.938,0.85,0.971,1.0,0.895,0.942,0.929,0.903	0.962,0.95,0.86,0.887,0.859,0.02,0.934,1.0,0.982,0.881	0.104	0.00135	0.024	chr10:3823833:3824406:-@chr10:3822298:3822421:-@chr10:3818188:3821782:-	ENST00000497571	0.83	0.44	0.94	0.556	0.801	0.137	0.02	0.71	0.592	0.039	0.907	0.271	0.044	0.94	28.454	5.704	62.5	0.103	0.284	0	0.138	0	0	1	0	0	1	1	0.138	0	0	0	SE
ENSG00000174628	IQCK	ENST00000320394	CCDS10580.1	PRINCIPAL:2	16	+	0.5,0.855,0.925,0.934,0.779,0.779,0.876,0.764,0.815,0.956	0.468,0.746,0.557,0.922,0.931,NA,0.329,0.618,0.725,0.859	0.134	0.00199	0.0338	chr16:19746675:19746772:+@chr16:19775170:19775222:+@chr16:19800160:19800244:+	ENST00000320394	0.82	0.412	0.945	0.7	0.842	0.055	0.021	0.159	0.366	0.033	0.832	0.579	0.08	0.945	22.56	3.118	60.089	0.111	0.248	0	0.151	0	0	1	0	0	1	1	0.151	0	0	0	SE
ENSG00000174628	IQCK	NA	NA	NA	16	+	0.5,0.855,0.925,0.934,0.779,0.779,0.876,0.764,0.815,0.956	0.468,0.746,0.557,0.922,0.931,NA,0.329,0.618,0.725,0.859	0.134	0.00199	0.0338	chr16:19746675:19746772:+@chr16:19775170:19775222:+@chr16:19800160:19800244:+	ENST00000541926	0.82	0.412	0.947	0.595	0.838	0.066	0.021	0.188	0.363	0.031	0.87	0.571	0.069	0.947	23.87	3.588	54.15	0.109	0.256	0	0.151	0	0	1	0	0	1	1	0.151	0	0	0	SE
ENSG00000054392	HHAT	NA	NA	NA	1	+	0.939,0.765,1.0,0.75,0.538,0.778,0.514,0.806,0.733,0.875	1.0,1.0,0.6,1.0,1.0,NA,1.0,1.0,0.667,1.0	-0.149	1.75e-13	1.63e-11	chr1:210560812:210560925:+@chr1:210573812:210574006:+@chr1:210577808:210578023:+	ENST00000545154	0.81	0.372	0.955	0.753	0.934	0.02	0.016	0.034	0.046	0.027	0.213	0.934	0.753	0.955	16.759	4.933	43.7	0.088	0.174	0	0.136	0	0	1	0	0	1	1	0.136	0.485	0.101	0	SE
ENSG00000177225	PDDC1	NA	NA	NA	11	-	0.96,1.0,0.91,1.0,0.905,1.0,1.0,0.87,0.963,0.892	0.97,0.941,0.848,0.968,0.913,0.0,1.0,0.83,0.889,0.927	0.121	4.66e-06	0.000175	chr11:777399:777484:-@chr11:775066:775142:-@chr11:774008:774113:-	ENST00000526325	0.81	0.179	0.947	0.519	0.832	0.217	0.02	0.909	0.327	0.032	0.902	0.456	0.02	0.947	16.209	2.174	46.087	0.087	0.388	0	0.121	0	0	1	0	0	1	1	0.121	0	0	0	SE
ENSG00000068354	TBC1D25	ENST00000376771	CCDS35242.1	PRINCIPAL:1	X	+	0.744,0.642,0.775,0.864,0.698,0.686,0.765,0.736,0.667,0.797	0.85,0.882,0.781,0.923,1.0,NA,0.738,0.814,0.943,0.747	-0.116	0.000119	0.00274	chrX:48399721:48399830:+@chrX:48403257:48403411:+@chrX:48417285:48417412:+	ENST00000376771	0.81	0.359	0.912	0.364	0.762	0.325	0.028	0.912	0.492	0.065	0.901	0.183	0.022	0.88	25.479	1.882	76.526	0.089	0.393	0	0.122	0	0	1	0	0	1	1	0.122	0	0	0	SE
ENSG00000184939	ZFP90	ENST00000570495	CCDS42183.1	PRINCIPAL:1	16	+	0.803,0.872,0.917,0.786,0.833,NA,0.791,1.0,0.876,0.835	0.86,0.412,0.591,0.817,0.677,NA,0.759,0.688,1.0,0.929	0.109	0.00124	0.0223	chr16:68567601:68567758:+@chr16:68573661:68573728:+@chr16:68591901:68592027:+	ENST00000570495	0.81	0.243	0.889	0.846	0.871	0.071	0.054	0.098	0.871	0.846	0.889	0.058	0.055	0.062	29.242	14.611	44.089	0.515	0.847	0.697	0	0	11	0	1	1	0	0	0.697	0	0	0	SE
ENSG00000184939	ZFP90	ENST00000563169	CCDS42183.1	PRINCIPAL:1	16	+	0.803,0.872,0.917,0.786,0.833,NA,0.791,1.0,0.876,0.835	0.86,0.412,0.591,0.817,0.677,NA,0.759,0.688,1.0,0.929	0.109	0.00124	0.0223	chr16:68567601:68567758:+@chr16:68573661:68573728:+@chr16:68591901:68592027:+	ENST00000563169	0.81	0.243	0.889	0.846	0.871	0.071	0.054	0.098	0.871	0.846	0.889	0.058	0.055	0.062	29.242	14.611	44.089	0.515	0.847	0.697	0	0	11	0	1	1	0	0	0.697	0	0	0	SE
ENSG00000184939	ZFP90	ENST00000398253	CCDS42183.1	PRINCIPAL:1	16	+	0.803,0.872,0.917,0.786,0.833,NA,0.791,1.0,0.876,0.835	0.86,0.412,0.591,0.817,0.677,NA,0.759,0.688,1.0,0.929	0.109	0.00124	0.0223	chr16:68567601:68567758:+@chr16:68573661:68573728:+@chr16:68591901:68592027:+	ENST00000398253	0.81	0.243	0.889	0.846	0.871	0.071	0.054	0.098	0.871	0.846	0.889	0.058	0.055	0.062	29.242	14.611	44.089	0.515	0.847	0.697	0	0	11	0	1	1	0	0	0.697	0	0	0	SE
ENSG00000174628	IQCK	ENST00000564186	-	ALTERNATIVE:2	16	+	0.5,0.855,0.925,0.934,0.779,0.779,0.876,0.764,0.815,0.956	0.468,0.746,0.557,0.922,0.931,NA,0.329,0.618,0.725,0.859	0.134	0.00199	0.0338	chr16:19746675:19746772:+@chr16:19775170:19775222:+@chr16:19800160:19800244:+	ENST00000564186	0.81	0.412	0.948	0.648	0.86	0.045	0.02	0.113	0.357	0.031	0.877	0.597	0.068	0.948	24.763	2.706	56.2	0.122	0.265	0	0.165	0	0	1	0	0	1	1	0.165	0	0	0	SE
ENSG00000103091	WDR59	NA	NA	NA	16	-	1.0,1.0,0.979,0.814,1.0,1.0,0.973,1.0,0.97,1.0	0.867,1.0,1.0,0.889,1.0,0.069,0.933,0.933,1.0,0.941	0.11	3.98e-17	4.93e-15	chr16:74999671:74999720:-@chr16:74990373:74990508:-@chr16:74985356:74985441:-	ENST00000563111	0.8	0.45	0.92	0.487	0.801	0.369	0.036	0.92	0.577	0.058	0.916	0.054	0.021	0.105	18.565	0.957	60.316	0.081	0.257	0	0.126	0	0	1	0	0	1	1	0.126	0	0	0	SE
ENSG00000054392	HHAT	ENST00000413764	CCDS1495.1	PRINCIPAL:1	1	+	0.939,0.765,1.0,0.75,0.538,0.778,0.514,0.806,0.733,0.875	1.0,1.0,0.6,1.0,1.0,NA,1.0,1.0,0.667,1.0	-0.149	1.75e-13	1.63e-11	chr1:210560812:210560925:+@chr1:210573812:210574006:+@chr1:210577808:210578023:+	ENST00000413764	0.8	0.372	0.955	0.691	0.927	0.02	0.015	0.033	0.053	0.026	0.283	0.927	0.691	0.955	16.637	4.5	36.622	0.088	0.237	0	0.146	0	0	1	0	0	1	1	0.146	0.485	0.101	0	SE
ENSG00000054392	HHAT	ENST00000367010	CCDS1495.1	PRINCIPAL:1	1	+	0.939,0.765,1.0,0.75,0.538,0.778,0.514,0.806,0.733,0.875	1.0,1.0,0.6,1.0,1.0,NA,1.0,1.0,0.667,1.0	-0.149	1.75e-13	1.63e-11	chr1:210560812:210560925:+@chr1:210573812:210574006:+@chr1:210577808:210578023:+	ENST00000367010	0.8	0.372	0.955	0.691	0.927	0.02	0.015	0.033	0.053	0.026	0.283	0.927	0.691	0.955	16.637	4.5	36.622	0.088	0.237	0	0.146	0	0	1	0	0	1	1	0.146	0.485	0.101	0	SE
ENSG00000164074	C4orf29	ENST00000398965	CCDS47131.1	PRINCIPAL:1	4	+	0.887,0.852,0.907,0.486,0.625,0.571,0.647,0.333,0.846,0.789	1.0,0.84,0.8,0.85,0.714,NA,1.0,0.789,0.75,0.926	-0.158	4.09e-05	0.00117	chr4:128905494:128905578:+@chr4:128910876:128910976:+@chr4:128930075:128930112:+	ENST00000398965	0.8	0.38	0.924	0.456	0.761	0.39	0.038	0.924	0.496	0.048	0.91	0.114	0.018	0.58	29.922	2.4	73.2	0.107	0.494	0	0.201	0	0	1	0	0	1	1	0.201	1	0.088	0	SE
ENSG00000164074	C4orf29	ENST00000444616	-	PRINCIPAL:1	4	+	0.887,0.852,0.907,0.486,0.625,0.571,0.647,0.333,0.846,0.789	1.0,0.84,0.8,0.85,0.714,NA,1.0,0.789,0.75,0.926	-0.158	4.09e-05	0.00117	chr4:128905494:128905578:+@chr4:128910876:128910976:+@chr4:128930075:128930112:+	ENST00000444616	0.8	0.38	0.924	0.456	0.761	0.39	0.038	0.924	0.496	0.048	0.91	0.114	0.018	0.58	29.922	2.4	73.2	0.107	0.494	0	0.201	0	0	1	0	0	1	1	0.201	1	0.088	0	SE
ENSG00000107021	TBC1D13	NA	NA	NA	9	+	0.927,0.709,0.913,0.771,0.8,1.0,0.848,0.722,0.862,0.883	0.684,0.831,0.832,0.753,0.752,NA,0.64,0.644,0.691,0.81	0.106	9.84e-05	0.0023	chr9:131550613:131550686:+@chr9:131553014:131553054:+@chr9:131553659:131553720:+	ENST00000223865	0.8	0.435	0.939	0.614	0.848	0.06	0.022	0.283	0.537	0.04	0.909	0.403	0.057	0.939	19.657	2	63.737	0.094	0.127	0	0.106	0	0	1	0	0	1	1	0.106	0	0	0	SE
ENSG00000174628	IQCK	NA	NA	NA	16	+	0.5,0.855,0.925,0.934,0.779,0.779,0.876,0.764,0.815,0.956	0.468,0.746,0.557,0.922,0.931,NA,0.329,0.618,0.725,0.859	0.134	0.00199	0.0338	chr16:19746675:19746772:+@chr16:19775170:19775222:+@chr16:19800160:19800244:+	ENST00000433597	0.8	0.412	0.947	0.708	0.867	0.047	0.02	0.126	0.388	0.033	0.879	0.565	0.063	0.947	24.479	2.353	56.3	0.124	0.245	0	0.167	0	0	1	0	0	1	1	0.167	0	0	0	SE
ENSG00000198794	SCAMP5	NA	NA	NA	15	+	0.737,0.329,0.625,0.554,0.514,0.415,0.473,0.359,0.345,0.539	0.721,0.185,0.495,0.344,0.485,0.0,0.346,0.225,0.244,0.49	0.135	2.36e-176	5.89e-173	chr15:75305018:75305146:+@chr15:75308934:75309090:+@chr15:75310211:75310312:+	ENST00000562327	0.79	0.466	0.954	0.57	0.903	0.022	0.017	0.061	0.165	0.027	0.861	0.813	0.105	0.954	14.384	2.519	48.267	0.082	0.244	0	0.12	0	0	1	0	0	1	1	0.12	1	0.486	0	SE
ENSG00000004534	RBM6	ENST00000266022	CCDS2809.1	PRINCIPAL:1	3	+	0.374,0.806,0.613,0.649,0.931,0.814,0.891,0.801,0.861,0.762	0.374,0.701,0.794,0.573,0.638,0.468,0.761,0.593,0.707,0.73	0.116	7.13e-12	5.78e-10	chr3:50000009:50000118:+@chr3:50036873:50036946:+@chr3:50085678:50085752:+	ENST00000266022	0.79	0.573	0.923	0.479	0.818	0.213	0.023	0.911	0.347	0.054	0.9	0.439	0.028	0.923	19.217	4.074	51	0.095	0.433	0	0.155	0	0	1	0	0	1	1	0.155	0	0	0	SE
ENSG00000153310	FAM49B	NA	NA	NA	8	-	0.711,0.833,0.725,0.743,0.853,0.275,0.813,0.668,0.726,0.826	0.695,0.893,0.792,0.85,0.887,1.0,0.941,0.842,0.794,0.804	-0.132	2.43e-07	1.15e-05	chr8:130915558:130915596:-@chr8:130891635:130891717:-@chr8:130883621:130883742:-	ENST00000519070	0.79	0.581	0.938	0.499	0.785	0.143	0.023	0.722	0.509	0.037	0.9	0.347	0.043	0.938	28.188	4.235	67.895	0.153	0.7	0.542	0.244	1	11	0.56	0.44	0.44	0.56	0.56	0.375	0.32	0.276	0	SE
ENSG00000153310	FAM49B	NA	NA	NA	8	-	0.711,0.833,0.725,0.743,0.853,0.275,0.813,0.668,0.726,0.826	0.695,0.893,0.792,0.85,0.887,1.0,0.941,0.842,0.794,0.804	-0.132	2.43e-07	1.15e-05	chr8:130915558:130915596:-@chr8:130891635:130891717:-@chr8:130883621:130883742:-	ENST00000522361	0.79	0.581	0.938	0.512	0.799	0.152	0.022	0.861	0.48	0.037	0.901	0.369	0.027	0.938	26.196	2.905	71.053	0.117	0.711	0.547	0.186	1	11	0.56	0.44	0.44	0.56	0.56	0.345	0.32	0.296	0	SE
ENSG00000177225	PDDC1	ENST00000319863	CCDS7713.1	PRINCIPAL:1	11	-	0.96,1.0,0.91,1.0,0.905,1.0,1.0,0.87,0.963,0.892	0.97,0.941,0.848,0.968,0.913,0.0,1.0,0.83,0.889,0.927	0.121	4.66e-06	0.000175	chr11:777399:777484:-@chr11:775066:775142:-@chr11:774008:774113:-	ENST00000319863	0.78	0.179	0.946	0.494	0.809	0.198	0.02	0.893	0.355	0.033	0.899	0.447	0.022	0.946	15.36	2.783	40.75	0.086	0.376	0	0.121	0	0	1	0	0	1	1	0.121	0	0	0	SE
ENSG00000115042	FAHD2A	ENST00000447036	CCDS2014.1	PRINCIPAL:1	2	+	1.0,1.0,1.0,0.81,1.0,0.0,1.0,1.0,0.636,0.583	1.0,1.0,0.721,1.0,1.0,1.0,1.0,1.0,0.935,0.771	-0.14	0.000164	0.00366	chr2:96068471:96068620:+@chr2:96072689:96072905:+@chr2:96076275:96076334:+	ENST00000447036	0.78	0.348	0.944	0.485	0.793	0.177	0.02	0.903	0.618	0.036	0.919	0.205	0.02	0.944	25.212	1.613	72.875	0.088	0.199	0	0.126	0	0	1	0	0	1	1	0.126	0.658	0.231	0	SE
ENSG00000115042	FAHD2A	ENST00000233379	CCDS2014.1	PRINCIPAL:1	2	+	1.0,1.0,1.0,0.81,1.0,0.0,1.0,1.0,0.636,0.583	1.0,1.0,0.721,1.0,1.0,1.0,1.0,1.0,0.935,0.771	-0.14	0.000164	0.00366	chr2:96068471:96068620:+@chr2:96072689:96072905:+@chr2:96076275:96076334:+	ENST00000233379	0.78	0.348	0.944	0.485	0.793	0.177	0.02	0.903	0.618	0.036	0.919	0.205	0.02	0.944	25.212	1.613	72.875	0.088	0.199	0	0.126	0	0	1	0	0	1	1	0.126	0.658	0.231	0	SE
ENSG00000184939	ZFP90	NA	NA	NA	16	+	0.803,0.872,0.917,0.786,0.833,NA,0.791,1.0,0.876,0.835	0.86,0.412,0.591,0.817,0.677,NA,0.759,0.688,1.0,0.929	0.109	0.00124	0.0223	chr16:68567601:68567758:+@chr16:68573661:68573728:+@chr16:68591901:68592027:+	ENST00000571382	0.78	0.243	0.89	0.76	0.862	0.08	0.054	0.189	0.862	0.76	0.89	0.057	0.051	0.061	36.915	18.609	63.214	0.544	0.885	0.757	0	0	11	0	1	1	0	0	0.757	0	0	0	SE
ENSG00000054392	HHAT	NA	NA	NA	1	+	0.939,0.765,1.0,0.75,0.538,0.778,0.514,0.806,0.733,0.875	1.0,1.0,0.6,1.0,1.0,NA,1.0,1.0,0.667,1.0	-0.149	1.75e-13	1.63e-11	chr1:210560812:210560925:+@chr1:210573812:210574006:+@chr1:210577808:210578023:+	ENST00000391905	0.77	0.372	0.955	0.525	0.93	0.019	0.015	0.025	0.052	0.026	0.525	0.929	0.457	0.955	16.883	4.929	36.756	0.096	0.235	0	0.152	0	0	1	0	0	1	1	0.152	0.485	0.101	0	SE
ENSG00000142892	PIGK	ENST00000370812	CCDS674.1	PRINCIPAL:1	1	-	1.0,1.0,0.906,0.905,0.967,0.222,0.923,1.0,0.796,0.885	0.953,0.931,1.0,0.935,1.0,1.0,0.937,1.0,1.0,0.932	-0.108	3.58e-05	0.00103	chr1:77676121:77676174:-@chr1:77634945:77635080:-@chr1:77632404:77632515:-	ENST00000370812	0.77	0.393	0.91	0.478	0.786	0.198	0.037	0.774	0.658	0.071	0.91	0.144	0.03	0.829	24.162	2.783	62.45	0.091	0.212	0	0.123	0	0	1	0	0	1	1	0.123	1	0.197	0	SE
ENSG00000103091	WDR59	ENST00000262144	CCDS32488.1	PRINCIPAL:1	16	-	1.0,1.0,0.979,0.814,1.0,1.0,0.973,1.0,0.97,1.0	0.867,1.0,1.0,0.889,1.0,0.069,0.933,0.933,1.0,0.941	0.11	3.98e-17	4.93e-15	chr16:74999671:74999720:-@chr16:74990373:74990508:-@chr16:74985356:74985441:-	ENST00000262144	0.76	0.45	0.925	0.488	0.796	0.419	0.037	0.925	0.534	0.053	0.911	0.047	0.019	0.117	20.799	1.391	58.737	0.079	0.177	0	0.109	0	0	1	0	0	1	1	0.109	0	0	0	SE
ENSG00000167130	DOLPP1	ENST00000372546	CCDS6918.1	PRINCIPAL:1	9	+	0.728,0.778,0.825,0.857,0.843,1.0,0.944,0.881,0.875,0.886	0.691,0.83,0.753,0.765,0.929,0.492,0.824,0.714,0.813,0.789	0.102	1.86e-05	0.000603	chr9:131847797:131847895:+@chr9:131848418:131848546:+@chr9:131848988:131849077:+	ENST00000372546	0.76	0.378	0.954	0.559	0.909	0.025	0.015	0.115	0.113	0.028	0.872	0.862	0.088	0.954	16.496	2.267	41.895	0.093	0.35	0	0.133	0	0	1	0	0	1	1	0.133	0.705	0.25	0	SE
ENSG00000188452	CERKL	NA	NA	NA	2	-	0.859,0.922,0.866,0.812,0.96,1.0,0.814,0.748,0.764,0.918	0.552,0.748,0.534,0.77,0.907,NA,0.797,0.869,0.654,0.677	0.143	0.000329	0.00682	chr2:182438480:182438611:-@chr2:182430785:182430848:-@chr2:182423293:182423435:-	ENST00000409440	0.76	0.396	0.926	0.582	0.844	0.316	0.024	0.926	0.581	0.051	0.919	0.103	0.021	0.87	30.921	2.941	55.467	0.116	0.393	0	0.223	0	0	1	0	0	1	1	0.223	0	0	0	SE
ENSG00000242574	HLA-DMB	ENST00000418107	CCDS4760.1	PRINCIPAL:1	6	-	0.671,0.453,0.641,0.521,0.872,0.671,0.445,0.886,0.613,0.792	NA,0.0,1.0,0.891,0.789,1.0,1.0,1.0,1.0,0.852	-0.18	2.4e-35	6.77e-33	chr6:32904949:32905216:-@chr6:32903119:32903154:-@chr6:32902406:32902764:-	ENST00000418107	0.75	0.267	0.886	0.849	0.868	0.064	0.046	0.095	0.868	0.849	0.886	0.068	0.057	0.083	36.483	22.882	57.625	0.537	0.838	0.662	0	0	13	0	1	1	0	0	0.662	0	0	0	SE
ENSG00000242574	HLA-DMB	ENST00000418107	CCDS4760.1	PRINCIPAL:1	6	-	0.475,0.281,0.477,0.301,0.339,0.498,0.264,0.639,0.489,0.373	0.449,0.312,0.849,0.772,0.856,0.426,0.898,0.712,0.729,0.898	-0.276	1.8e-18	2.48e-16	chr6:32903313:32903429:-@chr6:32903119:32903154:-@chr6:32902406:32902764:-	ENST00000418107	0.75	0.267	0.886	0.849	0.868	0.064	0.046	0.095	0.868	0.849	0.886	0.068	0.057	0.083	36.483	22.882	57.625	0.537	0.838	0.662	0	0	13	0	1	1	0	0	0.662	0	0	0	SE
ENSG00000054392	HHAT	NA	NA	NA	1	+	0.939,0.765,1.0,0.75,0.538,0.778,0.514,0.806,0.733,0.875	1.0,1.0,0.6,1.0,1.0,NA,1.0,1.0,0.667,1.0	-0.149	1.75e-13	1.63e-11	chr1:210560812:210560925:+@chr1:210573812:210574006:+@chr1:210577808:210578023:+	ENST00000308852	0.75	0.372	0.954	0.734	0.932	0.019	0.014	0.03	0.048	0.027	0.238	0.932	0.734	0.954	15.654	4.857	43.85	0.091	0.174	0	0.13	0	0	1	0	0	1	1	0.13	0.485	0.101	0	SE
ENSG00000054392	HHAT	ENST00000261458	CCDS1495.1	PRINCIPAL:1	1	+	0.939,0.765,1.0,0.75,0.538,0.778,0.514,0.806,0.733,0.875	1.0,1.0,0.6,1.0,1.0,NA,1.0,1.0,0.667,1.0	-0.149	1.75e-13	1.63e-11	chr1:210560812:210560925:+@chr1:210573812:210574006:+@chr1:210577808:210578023:+	ENST00000261458	0.75	0.372	0.955	0.652	0.933	0.019	0.014	0.027	0.052	0.026	0.652	0.928	0.324	0.955	16.455	3.929	44.4	0.095	0.222	0	0.144	0	0	1	0	0	1	1	0.144	0.485	0.101	0	SE
ENSG00000151116	UEVLD	ENST00000396197	CCDS41624.1	PRINCIPAL:1	11	-	0.724,0.83,0.805,0.778,0.909,0.167,0.786,0.892,0.93,0.784	0.714,0.86,0.964,0.818,1.0,NA,0.804,1.0,0.92,0.792	-0.114	2.39e-05	0.000733	chr11:18557953:18558016:-@chr11:18555877:18556000:-@chr11:18553828:18554034:-	ENST00000396197	0.75	0.364	0.948	0.473	0.791	0.11	0.019	0.547	0.359	0.031	0.909	0.531	0.038	0.948	19.579	1.565	57.3	0.089	0.148	0	0.108	0	0	1	0	0	1	1	0.108	1	0.292	0	SE
ENSG00000151116	UEVLD	NA	NA	NA	11	-	0.724,0.83,0.805,0.778,0.909,0.167,0.786,0.892,0.93,0.784	0.714,0.86,0.964,0.818,1.0,NA,0.804,1.0,0.92,0.792	-0.114	2.39e-05	0.000733	chr11:18557953:18558016:-@chr11:18555877:18556000:-@chr11:18553828:18554034:-	ENST00000379387	0.75	0.364	0.949	0.5	0.812	0.094	0.019	0.43	0.352	0.031	0.906	0.553	0.042	0.949	19.457	2.435	52.95	0.091	0.178	0	0.11	0	0	1	0	0	1	1	0.11	1	0.292	0	SE
ENSG00000142892	PIGK	NA	NA	NA	1	-	1.0,1.0,0.906,0.905,0.967,0.222,0.923,1.0,0.796,0.885	0.953,0.931,1.0,0.935,1.0,1.0,0.937,1.0,1.0,0.932	-0.108	3.58e-05	0.00103	chr1:77676121:77676174:-@chr1:77634945:77635080:-@chr1:77632404:77632515:-	ENST00000359130	0.75	0.393	0.91	0.36	0.768	0.227	0.039	0.828	0.685	0.139	0.91	0.088	0.028	0.453	23.981	2.522	63.4	0.093	0.209	0	0.121	0	0	1	0	0	1	1	0.121	1	0.197	0	SE
ENSG00000197535	MYO5A	NA	NA	NA	15	-	0.098,0.36,0.286,0.189,0.038,NA,0.316,0.132,0.178,0.108	0.16,0.0,0.158,0.12,0.1,0.0,0.077,0.0,0.027,0.069	0.118	0.000113	0.0026	chr15:52638558:52638658:-@chr15:52635314:52635394:-@chr15:52632393:52632591:-	ENST00000568914	0.75	0.465	0.95	0.473	0.829	0.032	0.019	0.067	0.377	0.031	0.861	0.592	0.097	0.95	29.485	7.412	54.158	0.158	0.515	0.508	0.225	1	7	0.75	0.25	0.25	0.75	0.75	0.296	0	0	0	SE
ENSG00000197535	MYO5A	NA	NA	NA	15	-	0.098,0.36,0.286,0.189,0.038,NA,0.316,0.132,0.178,0.108	0.16,0.0,0.158,0.12,0.1,0.0,0.077,0.0,0.027,0.069	0.118	0.000113	0.0026	chr15:52638558:52638658:-@chr15:52635314:52635394:-@chr15:52632393:52632591:-	ENST00000399228	0.75	0.465	0.95	0.519	0.843	0.038	0.019	0.086	0.402	0.031	0.873	0.56	0.065	0.95	30.191	7.706	54.8	0.194	0.536	0.517	0.253	1	9	0.679	0.321	0.321	0.679	0.679	0.338	0	0	0	SE
ENSG00000198794	SCAMP5	NA	NA	NA	15	+	0.737,0.329,0.625,0.554,0.514,0.415,0.473,0.359,0.345,0.539	0.721,0.185,0.495,0.344,0.485,0.0,0.346,0.225,0.244,0.49	0.135	2.36e-176	5.89e-173	chr15:75305018:75305146:+@chr15:75308934:75309090:+@chr15:75310211:75310312:+	ENST00000567920	0.74	0.466	0.954	0.62	0.906	0.023	0.017	0.08	0.166	0.027	0.885	0.811	0.079	0.954	14.667	2.741	50.533	0.082	0.243	0	0.12	0	0	1	0	0	1	1	0.12	1	0.458	0	SE
ENSG00000070159	PTPN3	ENST00000374541	CCDS6776.1	PRINCIPAL:1	9	-	0.876,0.775,0.726,0.826,0.724,1.0,0.957,0.896,0.851,0.691	0.846,0.517,0.651,0.704,1.0,0.0,0.689,0.577,0.571,0.623	0.214	2.63e-05	0.000797	chr9:112219453:112219495:-@chr9:112216776:112216854:-@chr9:112211091:112211135:-	ENST00000374541	0.74	0.415	0.945	0.546	0.782	0.293	0.021	0.847	0.373	0.035	0.923	0.333	0.024	0.945	23.244	3.097	58	0.095	0.18	0	0.114	0	0	1	0	0	1	1	0.114	0.429	0.109	0	SE
ENSG00000065534	MYLK	ENST00000360772	CCDS3023.1	PRINCIPAL:3	3	-	0.538,0.638,0.882,0.579,0.7,NA,0.81,0.831,0.959,0.855	0.92,0.852,0.714,1.0,0.864,NA,0.89,1.0,0.697,0.911	-0.117	3.01e-05	0.000887	chr3:123367818:123367911:-@chr3:123366071:123366274:-@chr3:123359134:123359351:-	ENST00000360772	0.74	0.433	0.951	0.486	0.838	0.283	0.017	0.925	0.341	0.029	0.916	0.376	0.017	0.951	22.881	0.903	70.4	0.081	0.158	0	0.105	0	0	1	0	0	1	1	0.105	1	0.359	0	SE
ENSG00000065534	MYLK	ENST00000359169	CCDS3023.1	PRINCIPAL:3	3	-	0.538,0.638,0.882,0.579,0.7,NA,0.81,0.831,0.959,0.855	0.92,0.852,0.714,1.0,0.864,NA,0.89,1.0,0.697,0.911	-0.117	3.01e-05	0.000887	chr3:123367818:123367911:-@chr3:123366071:123366274:-@chr3:123359134:123359351:-	ENST00000359169	0.74	0.433	0.951	0.486	0.838	0.283	0.017	0.925	0.341	0.029	0.916	0.376	0.017	0.951	22.881	0.903	70.4	0.081	0.158	0	0.105	0	0	1	0	0	1	1	0.105	1	0.359	0	SE
ENSG00000081803	CADPS2	ENST00000412584	CCDS47691.1	PRINCIPAL:3	7	-	0.916,0.58,0.502,0.599,0.658,0.257,0.695,0.539,0.724,0.521	0.855,0.584,0.771,0.871,0.716,NA,0.808,0.529,0.938,0.785	-0.163	4.09e-05	0.00117	chr7:122027080:122027227:-@chr7:122026349:122026363:-@chr7:122019422:122019496:-	ENST00000412584	0.74	0.383	0.93	0.481	0.741	0.053	0.023	0.127	0.397	0.048	0.74	0.55	0.134	0.93	33.605	9.059	45.056	0.195	0.409	0	0.292	0	0	1	0	0	1	1	0.292	0	0	0	SE
ENSG00000107021	TBC1D13	ENST00000372648	CCDS6911.1	PRINCIPAL:1	9	+	0.927,0.709,0.913,0.771,0.8,1.0,0.848,0.722,0.862,0.883	0.684,0.831,0.832,0.753,0.752,NA,0.64,0.644,0.691,0.81	0.106	9.84e-05	0.0023	chr9:131550613:131550686:+@chr9:131553014:131553054:+@chr9:131553659:131553720:+	ENST00000372648	0.74	0.435	0.947	0.802	0.897	0.032	0.019	0.06	0.451	0.034	0.912	0.518	0.051	0.947	20.321	1.926	62.526	0.094	0.119	0	0.104	0	0	1	0	0	1	1	0.104	0	0	0	SE
ENSG00000197535	MYO5A	ENST00000399233	-	ALTERNATIVE:2	15	-	0.098,0.36,0.286,0.189,0.038,NA,0.316,0.132,0.178,0.108	0.16,0.0,0.158,0.12,0.1,0.0,0.077,0.0,0.027,0.069	0.118	0.000113	0.0026	chr15:52638558:52638658:-@chr15:52635314:52635394:-@chr15:52632393:52632591:-	ENST00000399233	0.74	0.465	0.952	0.46	0.821	0.031	0.018	0.082	0.341	0.029	0.856	0.628	0.116	0.952	28.83	7.313	50.684	0.174	0.53	0.514	0.253	1	7	0.75	0.25	0.25	0.75	0.75	0.318	0	0	0	SE
ENSG00000130508	PXDN	ENST00000252804	CCDS46221.1	PRINCIPAL:1	2	-	0.671,0.833,1.0,NA,NA,NA,0.754,0.76,0.915,0.884	0.597,0.689,1.0,1.0,0.505,1.0,0.771,0.634,0.389,0.525	0.12	0.000483	0.00961	chr2:1695700:1695771:-@chr2:1691404:1691475:-@chr2:1687852:1687923:-	ENST00000252804	0.74	0.461	0.914	0.414	0.725	0.175	0.02	0.815	0.519	0.111	0.914	0.306	0.041	0.848	26.345	2.471	64.9	0.1	0.147	0	0.119	0	0	1	0	0	1	1	0.119	1	0.41	0	SE
ENSG00000189292	FAM150B	NA	NA	NA	2	-	1.0,0.897,1.0,1.0,0.811,0.814,0.836,0.909,0.824,0.913	1.0,0.829,1.0,0.892,0.92,0.407,0.652,1.0,0.565,0.706	0.103	0.00125	0.0224	chr2:286290:286343:-@chr2:286123:286203:-@chr2:283111:283175:-	ENST00000452023	0.74	0.338	0.935	0.462	0.709	0.18	0.023	0.622	0.595	0.042	0.911	0.225	0.048	0.935	25.937	6.857	62.8	0.096	0.131	0	0.113	0	0	1	0	0	1	1	0.113	1	0.239	0	SE
ENSG00000109466	KLHL2	NA	NA	NA	4	+	0.98,0.87,0.805,0.905,0.745,1.0,0.63,0.798,0.642,0.921	0.967,0.941,1.0,0.917,1.0,NA,0.968,1.0,1.0,0.906	-0.137	8.02e-21	1.22e-18	chr4:166141086:166141211:+@chr4:166149959:166150065:+@chr4:166159930:166160051:+	ENST00000511305	0.73	0.306	0.936	0.399	0.788	0.278	0.02	0.924	0.328	0.037	0.908	0.395	0.022	0.936	19.876	2.714	54.8	0.103	0.426	0	0.155	0	0	1	0	0	1	1	0.155	1	0.673	0	SE
ENSG00000120158	RCL1	ENST00000381750	CCDS6456.1	PRINCIPAL:1	9	+	0.985,1.0,0.967,1.0,1.0,1.0,0.968,1.0,1.0,1.0	0.963,0.951,1.0,1.0,0.957,0.0,1.0,1.0,1.0,0.974	0.108	9.88e-14	9.34e-12	chr9:4823548:4823619:+@chr9:4826858:4827033:+@chr9:4833154:4833228:+	ENST00000381750	0.73	0.415	0.95	0.491	0.823	0.287	0.02	0.921	0.475	0.03	0.929	0.238	0.016	0.95	17.637	1.467	62.056	0.084	0.124	0	0.094	0	0	1	0	0	1	1	0.094	1	0.181	0	SE
ENSG00000134058	CDK7	NA	NA	NA	5	+	0.91,0.556,1.0,0.422,0.862,1.0,1.0,1.0,0.343,0.851	0.807,1.0,1.0,1.0,1.0,NA,1.0,1.0,0.566,1.0	-0.136	2.41e-07	1.14e-05	chr5:68548245:68548278:+@chr5:68551287:68551355:+@chr5:68553870:68553980:+	ENST00000514676	0.73	0.501	0.889	0.434	0.72	0.266	0.03	0.884	0.521	0.093	0.889	0.213	0.023	0.724	18.09	1.29	62.15	0.086	0.108	0	0.094	0	0	1	0	0	1	1	0.094	0.917	0.256	0	SE
ENSG00000177225	PDDC1	NA	NA	NA	11	-	0.96,1.0,0.91,1.0,0.905,1.0,1.0,0.87,0.963,0.892	0.97,0.941,0.848,0.968,0.913,0.0,1.0,0.83,0.889,0.927	0.121	4.66e-06	0.000175	chr11:777399:777484:-@chr11:775066:775142:-@chr11:774008:774113:-	ENST00000534603	0.73	0.179	0.922	0.481	0.744	0.191	0.028	0.741	0.412	0.05	0.915	0.397	0.035	0.922	24.896	4.074	58.667	0.108	0.329	0	0.161	0	0	1	0	0	1	1	0.161	0	0	0	SE
ENSG00000109686	SH3D19	ENST00000304527	CCDS34077.2	PRINCIPAL:3	4	-	0.242,0.439,0.457,0.656,0.321,0.477,0.6,0.343,0.404,0.45	0.201,0.429,0.263,0.51,0.192,NA,0.285,0.223,0.321,0.424	0.122	6.46e-06	0.000236	chr4:152069074:152069338:-@chr4:152065372:152065440:-@chr4:152065062:152065202:-	ENST00000304527	0.73	0.343	0.902	0.515	0.78	0.185	0.044	0.627	0.765	0.332	0.902	0.05	0.039	0.059	31.878	5.478	64.533	0.209	0.528	0.514	0.377	1	5	0.792	0.208	0.208	0.792	0.792	0.406	0.833	0.377	0	SE
ENSG00000109686	SH3D19	ENST00000409252	CCDS34077.2	PRINCIPAL:3	4	-	0.242,0.439,0.457,0.656,0.321,0.477,0.6,0.343,0.404,0.45	0.201,0.429,0.263,0.51,0.192,NA,0.285,0.223,0.321,0.424	0.122	6.46e-06	0.000236	chr4:152069074:152069338:-@chr4:152065372:152065440:-@chr4:152065062:152065202:-	ENST00000409252	0.73	0.343	0.902	0.515	0.78	0.185	0.044	0.627	0.765	0.332	0.902	0.05	0.039	0.059	31.878	5.478	64.533	0.209	0.528	0.514	0.377	1	5	0.792	0.208	0.208	0.792	0.792	0.406	0.833	0.377	0	SE
ENSG00000065534	MYLK	ENST00000360304	CCDS46896.1	ALTERNATIVE:2	3	-	0.538,0.638,0.882,0.579,0.7,NA,0.81,0.831,0.959,0.855	0.92,0.852,0.714,1.0,0.864,NA,0.89,1.0,0.697,0.911	-0.117	3.01e-05	0.000887	chr3:123367818:123367911:-@chr3:123366071:123366274:-@chr3:123359134:123359351:-	ENST00000360304	0.73	0.433	0.951	0.356	0.809	0.246	0.018	0.928	0.321	0.03	0.915	0.433	0.02	0.951	24.416	1.935	67.95	0.084	0.166	0	0.114	0	0	1	0	0	1	1	0.114	1	0.27	0	SE
ENSG00000065534	MYLK	ENST00000475616	CCDS46896.1	ALTERNATIVE:2	3	-	0.538,0.638,0.882,0.579,0.7,NA,0.81,0.831,0.959,0.855	0.92,0.852,0.714,1.0,0.864,NA,0.89,1.0,0.697,0.911	-0.117	3.01e-05	0.000887	chr3:123367818:123367911:-@chr3:123366071:123366274:-@chr3:123359134:123359351:-	ENST00000475616	0.73	0.433	0.951	0.356	0.809	0.246	0.018	0.928	0.321	0.03	0.915	0.433	0.02	0.951	24.416	1.935	67.95	0.084	0.166	0	0.114	0	0	1	0	0	1	1	0.114	1	0.27	0	SE
ENSG00000100209	HSCB	NA	NA	NA	22	+	0.71,0.457,0.85,0.591,0.847,0.747,0.78,0.575,0.862,0.699	0.809,0.411,0.563,0.58,0.853,0.06,0.659,0.469,0.58,0.686	0.145	0.000248	0.00531	chr22:29138030:29138319:+@chr22:29139870:29139911:+@chr22:29147229:29147276:+	ENST00000450178	0.73	0.205	0.945	0.576	0.834	0.126	0.019	0.576	0.414	0.036	0.902	0.46	0.041	0.945	36.266	1.412	61.75	0.173	0.301	0	0.227	0	0	1	0	0	1	1	0.227	0	0	0	SE
ENSG00000117569	PTBP2	ENST00000609116	CCDS72830.1	ALTERNATIVE:1	1	+	1.0,0.806,0.829,0.806,0.697,0.172,0.787,1.0,0.509,0.926	0.89,0.829,0.655,0.58,0.734,1.0,1.0,1.0,0.892,1.0	-0.105	0.000296	0.00624	chr1:97270341:97270495:+@chr1:97271975:97272008:+@chr1:97272422:97272514:+	ENST00000609116	0.73	0.513	0.81	0.53	0.68	0.129	0.045	0.288	0.368	0.089	0.81	0.503	0.111	0.805	14.635	3.529	48.368	0.083	0.121	0	0.096	0	0	1	0	0	1	1	0.096	0.417	0.089	0	SE
ENSG00000004534	RBM6	NA	NA	NA	3	+	0.374,0.806,0.613,0.649,0.931,0.814,0.891,0.801,0.861,0.762	0.374,0.701,0.794,0.573,0.638,0.468,0.761,0.593,0.707,0.73	0.116	7.13e-12	5.78e-10	chr3:50000009:50000118:+@chr3:50036873:50036946:+@chr3:50085678:50085752:+	ENST00000443081	0.72	0.573	0.909	0.508	0.794	0.216	0.025	0.909	0.406	0.061	0.901	0.378	0.027	0.878	24.484	5.111	58.286	0.113	0.418	0	0.174	0	0	1	0	0	1	1	0.174	0	0	0	SE
ENSG00000144040	SFXN5	ENST00000272433	CCDS1922.1	PRINCIPAL:1	2	-	1.0,0.818,0.857,0.2,1.0,0.714,0.692,0.6,1.0,0.892	0.81,1.0,1.0,1.0,1.0,NA,0.636,0.571,1.0,0.895	-0.102	5.15e-06	0.000192	chr2:73215387:73215477:-@chr2:73195577:73195662:-@chr2:73188260:73188377:-	ENST00000272433	0.72	0.508	0.954	0.658	0.92	0.019	0.015	0.023	0.074	0.027	0.679	0.908	0.306	0.954	15.205	3.565	31.8	0.122	0.162	0	0.141	0	0	1	0	0	1	1	0.141	1	0.097	0	SE
ENSG00000181938	GINS3	NA	NA	NA	16	+	1.0,0.6,0.7,0.379,0.5,0.667,0.412,0.647,0.73,0.565	0.882,1.0,1.0,0.882,0.727,NA,0.778,0.6,1.0,0.533	-0.202	3.13e-05	0.000914	chr16:58426298:58426691:+@chr16:58437002:58437235:+@chr16:58438403:58439385:+	ENST00000426538	0.72	0.427	0.953	0.429	0.802	0.125	0.018	0.898	0.362	0.028	0.919	0.514	0.025	0.953	23.473	0.609	74.389	0.089	0.343	0	0.146	0	0	1	0	0	1	1	0.146	0.937	0.692	0	SE
ENSG00000188452	CERKL	NA	NA	NA	2	-	0.859,0.922,0.866,0.812,0.96,1.0,0.814,0.748,0.764,0.918	0.552,0.748,0.534,0.77,0.907,NA,0.797,0.869,0.654,0.677	0.143	0.000329	0.00682	chr2:182438480:182438611:-@chr2:182430785:182430848:-@chr2:182423293:182423435:-	ENST00000339098	0.72	0.396	0.947	0.506	0.806	0.118	0.02	0.92	0.383	0.034	0.881	0.499	0.028	0.947	23.732	1.217	51.737	0.097	0.169	0	0.114	0	0	1	0	0	1	1	0.114	1	0.139	0	SE
ENSG00000189292	FAM150B	ENST00000403610	CCDS46218.1	PRINCIPAL:1	2	-	1.0,0.897,1.0,1.0,0.811,0.814,0.836,0.909,0.824,0.913	1.0,0.829,1.0,0.892,0.92,0.407,0.652,1.0,0.565,0.706	0.103	0.00125	0.0224	chr2:286290:286343:-@chr2:286123:286203:-@chr2:283111:283175:-	ENST00000403610	0.72	0.338	0.934	0.462	0.71	0.184	0.023	0.632	0.593	0.043	0.911	0.223	0.048	0.934	25.949	7	63	0.095	0.13	0	0.113	0	0	1	0	0	1	1	0.113	1	0.239	0	SE
ENSG00000163607	GTPBP8	NA	NA	NA	3	+	0.652,0.6,0.852,0.923,0.529,0.63,0.586,0.647,0.667,0.586	0.727,1.0,1.0,1.0,0.882,NA,0.926,0.862,0.818,0.765	-0.219	2.74e-15	2.97e-13	chr3:112709832:112710182:+@chr3:112713982:112714112:+@chr3:112715739:112715838:+	ENST00000383677	0.71	0.416	0.95	0.504	0.806	0.239	0.019	0.909	0.436	0.031	0.918	0.325	0.02	0.95	22.809	1.613	71.35	0.083	0.29	0	0.109	0	0	1	0	0	1	1	0.109	1	0.542	0	SE
ENSG00000163607	GTPBP8	NA	NA	NA	3	+	0.652,0.6,0.852,0.923,0.529,0.63,0.586,0.647,0.667,0.586	0.727,1.0,1.0,1.0,0.882,NA,0.926,0.862,0.818,0.765	-0.219	2.74e-15	2.97e-13	chr3:112709832:112710182:+@chr3:112713982:112714112:+@chr3:112715739:112715838:+	ENST00000485330	0.71	0.416	0.95	0.504	0.806	0.239	0.019	0.909	0.436	0.031	0.918	0.325	0.02	0.95	22.809	1.613	71.35	0.083	0.29	0	0.109	0	0	1	0	0	1	1	0.109	1	0.542	0	SE
ENSG00000163607	GTPBP8	NA	NA	NA	3	+	0.652,0.6,0.852,0.923,0.529,0.63,0.586,0.647,0.667,0.586	0.727,1.0,1.0,1.0,0.882,NA,0.926,0.862,0.818,0.765	-0.219	2.74e-15	2.97e-13	chr3:112709832:112710182:+@chr3:112713982:112714112:+@chr3:112715739:112715838:+	ENST00000467752	0.71	0.416	0.951	0.477	0.8	0.211	0.018	0.911	0.465	0.031	0.917	0.324	0.02	0.951	24.017	1.548	71.5	0.086	0.129	0	0.102	0	0	1	0	0	1	1	0.102	1	0.391	0	SE
ENSG00000054392	HHAT	NA	NA	NA	1	+	0.939,0.765,1.0,0.75,0.538,0.778,0.514,0.806,0.733,0.875	1.0,1.0,0.6,1.0,1.0,NA,1.0,1.0,0.667,1.0	-0.149	1.75e-13	1.63e-11	chr1:210560812:210560925:+@chr1:210573812:210574006:+@chr1:210577808:210578023:+	ENST00000545781	0.71	0.372	0.955	0.495	0.92	0.02	0.014	0.039	0.07	0.027	0.775	0.911	0.197	0.955	17.084	2.533	55.289	0.093	0.285	0	0.153	0	0	1	0	0	1	1	0.153	0.485	0.101	0	SE
ENSG00000004534	RBM6	NA	NA	NA	3	+	0.374,0.806,0.613,0.649,0.931,0.814,0.891,0.801,0.861,0.762	0.374,0.701,0.794,0.573,0.638,0.468,0.761,0.593,0.707,0.73	0.116	7.13e-12	5.78e-10	chr3:50000009:50000118:+@chr3:50036873:50036946:+@chr3:50085678:50085752:+	ENST00000454079	0.71	0.573	0.91	0.512	0.747	0.265	0.03	0.91	0.396	0.064	0.903	0.339	0.025	0.841	20.528	3.63	46.214	0.101	0.38	0	0.151	0	0	1	0	0	1	1	0.151	1	0.4	0	SE
ENSG00000135537	LACE1	ENST00000368977	CCDS5067.1	PRINCIPAL:1	6	+	0.684,0.75,0.625,0.75,1.0,0.579,1.0,1.0,0.846,0.917	1.0,1.0,0.857,1.0,1.0,1.0,1.0,1.0,0.556,1.0	-0.126	1.28e-08	7.14e-07	chr6:108798395:108798495:+@chr6:108831415:108831555:+@chr6:108840900:108841013:+	ENST00000368977	0.71	0.382	0.951	0.492	0.867	0.102	0.018	0.914	0.344	0.029	0.927	0.553	0.022	0.951	17.477	1.786	48.75	0.081	0.127	0	0.094	0	0	1	0	0	1	1	0.094	1	0.137	0	SE
ENSG00000065534	MYLK	NA	NA	NA	3	-	0.538,0.638,0.882,0.579,0.7,NA,0.81,0.831,0.959,0.855	0.92,0.852,0.714,1.0,0.864,NA,0.89,1.0,0.697,0.911	-0.117	3.01e-05	0.000887	chr3:123367818:123367911:-@chr3:123366071:123366274:-@chr3:123359134:123359351:-	ENST00000354792	0.71	0.433	0.952	0.522	0.842	0.29	0.018	0.923	0.315	0.029	0.915	0.396	0.02	0.952	24.587	2.129	69.75	0.083	0.15	0	0.11	0	0	1	0	0	1	1	0.11	1	0.27	0	SE
ENSG00000099331	MYO9B	ENST00000594824	-	PRINCIPAL:1	19	+	0.852,1.0,1.0,0.789,0.667,0.333,0.88,0.902,1.0,0.93	1.0,0.846,1.0,1.0,1.0,NA,0.926,1.0,1.0,1.0	-0.139	5.37e-05	0.00144	chr19:17286472:17286550:+@chr19:17291736:17291849:+@chr19:17294638:17294677:+	ENST00000594824	0.71	0.436	0.949	0.538	0.875	0.026	0.018	0.048	0.297	0.031	0.907	0.676	0.053	0.949	29.404	4.882	56.4	0.21	0.504	0.504	0.28	2	0	0.487	0	0	0.949	0.026	0.285	0	0	0	SE
ENSG00000005100	DHX33	ENST00000225296	CCDS11072.1	PRINCIPAL:1	17	-	0.949,0.467,1.0,1.0,1.0,NA,0.75,0.643,1.0,1.0	0.944,0.8,1.0,1.0,NA,NA,1.0,1.0,1.0,1.0	-0.1	0.000313	0.00652	chr17:5371891:5372380:-@chr17:5366849:5367009:-@chr17:5365639:5365866:-	ENST00000225296	0.71	0.39	0.95	0.487	0.854	0.11	0.018	0.875	0.416	0.03	0.914	0.474	0.021	0.95	21.153	1.935	67.6	0.085	0.115	0	0.101	0	0	1	0	0	1	1	0.101	1	0.374	0	SE
ENSG00000154310	TNIK	ENST00000488470	CCDS54678.1	ALTERNATIVE:2	3	-	0.778,1.0,0.92,1.0,1.0,1.0,1.0,1.0,0.935,0.758	0.696,0.769,0.864,0.833,0.652,NA,1.0,0.949,0.636,0.846	0.134	0.000478	0.00952	chr3:170784365:170784524:-@chr3:170783976:170784115:-@chr3:170780292:170781753:-	ENST00000488470	0.71	0.576	0.946	0.485	0.781	0.244	0.02	0.883	0.41	0.033	0.912	0.346	0.023	0.946	20.966	4.629	43.533	0.083	0.129	0	0.097	0	0	1	0	0	1	1	0.097	0.917	0.158	0	SE
ENSG00000184939	ZFP90	NA	NA	NA	16	+	0.803,0.872,0.917,0.786,0.833,NA,0.791,1.0,0.876,0.835	0.86,0.412,0.591,0.817,0.677,NA,0.759,0.688,1.0,0.929	0.109	0.00124	0.0223	chr16:68567601:68567758:+@chr16:68573661:68573728:+@chr16:68591901:68592027:+	ENST00000576305	0.71	0.243	0.887	0.694	0.851	0.09	0.053	0.259	0.851	0.694	0.887	0.058	0.047	0.066	34.371	19.826	52.286	0.521	0.872	0.713	0	0	11	0	1	1	0	0	0.713	0	0	0	SE
ENSG00000118454	ANKRD13C	ENST00000370944	CCDS648.2	PRINCIPAL:1	1	-	0.844,0.843,0.719,0.797,0.895,1.0,0.72,0.828,0.593,0.803	0.95,0.873,1.0,1.0,0.905,NA,0.895,0.796,1.0,0.787	-0.108	4.12e-08	2.15e-06	chr1:70740403:70740501:-@chr1:70736539:70736639:-@chr1:70726271:70728530:-	ENST00000370944	0.7	0.528	0.953	0.516	0.877	0.105	0.016	0.831	0.238	0.028	0.915	0.657	0.022	0.953	18.831	3.412	41.55	0.085	0.119	0	0.098	0	0	1	0	0	1	1	0.098	1	0.13	0	SE
ENSG00000065534	MYLK	ENST00000346322	CCDS43141.1	ALTERNATIVE:2	3	-	0.538,0.638,0.882,0.579,0.7,NA,0.81,0.831,0.959,0.855	0.92,0.852,0.714,1.0,0.864,NA,0.89,1.0,0.697,0.911	-0.117	3.01e-05	0.000887	chr3:123367818:123367911:-@chr3:123366071:123366274:-@chr3:123359134:123359351:-	ENST00000346322	0.7	0.433	0.95	0.448	0.823	0.226	0.018	0.928	0.306	0.031	0.913	0.469	0.02	0.95	24.232	1.935	66.7	0.084	0.162	0	0.117	0	0	1	0	0	1	1	0.117	1	0.27	0	SE
ENSG00000164074	C4orf29	NA	NA	NA	4	+	0.887,0.852,0.907,0.486,0.625,0.571,0.647,0.333,0.846,0.789	1.0,0.84,0.8,0.85,0.714,NA,1.0,0.789,0.75,0.926	-0.158	4.09e-05	0.00117	chr4:128905494:128905578:+@chr4:128910876:128910976:+@chr4:128930075:128930112:+	ENST00000513371	0.7	0.38	0.923	0.501	0.797	0.388	0.037	0.922	0.458	0.054	0.923	0.154	0.02	0.779	25.966	2.174	73.267	0.095	0.186	0	0.115	0	0	1	0	0	1	1	0.115	1	0.393	0	SE
ENSG00000197535	MYO5A	ENST00000399231	CCDS42037.1	PRINCIPAL:3	15	-	0.098,0.36,0.286,0.189,0.038,NA,0.316,0.132,0.178,0.108	0.16,0.0,0.158,0.12,0.1,0.0,0.077,0.0,0.027,0.069	0.118	0.000113	0.0026	chr15:52638558:52638658:-@chr15:52635314:52635394:-@chr15:52632393:52632591:-	ENST00000399231	0.7	0.465	0.952	0.479	0.825	0.03	0.018	0.067	0.332	0.029	0.84	0.638	0.133	0.952	29.125	7.25	51.846	0.17	0.537	0.516	0.236	1	8	0.714	0.286	0.286	0.714	0.714	0.316	0	0	0	SE
ENSG00000162241	SLC25A45	NA	NA	NA	11	-	0.933,0.926,0.68,0.684,0.92,0.125,0.917,0.826,1.0,0.854	1.0,0.733,0.833,0.867,0.789,1.0,1.0,1.0,1.0,0.862	-0.122	0.000143	0.00322	chr11:65147338:65147409:-@chr11:65146847:65147032:-@chr11:65144289:65144547:-	ENST00000530936	0.7	0.276	0.953	0.485	0.824	0.036	0.017	0.527	0.228	0.028	0.91	0.736	0.055	0.953	18.219	2.261	59.667	0.102	0.488	0	0.178	0	0	1	0	0	1	1	0.178	0.492	0.388	0	SE
ENSG00000188452	CERKL	ENST00000410087	CCDS46466.1	PRINCIPAL:1	2	-	0.859,0.922,0.866,0.812,0.96,1.0,0.814,0.748,0.764,0.918	0.552,0.748,0.534,0.77,0.907,NA,0.797,0.869,0.654,0.677	0.143	0.000329	0.00682	chr2:182438480:182438611:-@chr2:182430785:182430848:-@chr2:182423293:182423435:-	ENST00000410087	0.7	0.396	0.94	0.576	0.842	0.154	0.02	0.915	0.474	0.039	0.91	0.372	0.027	0.94	27.204	1.913	61.167	0.095	0.125	0	0.112	0	0	1	0	0	1	1	0.112	1	0.165	0	SE
ENSG00000154310	TNIK	ENST00000341852	CCDS54674.1	ALTERNATIVE:2	3	-	0.778,1.0,0.92,1.0,1.0,1.0,1.0,1.0,0.935,0.758	0.696,0.769,0.864,0.833,0.652,NA,1.0,0.949,0.636,0.846	0.134	0.000478	0.00952	chr3:170784365:170784524:-@chr3:170783976:170784115:-@chr3:170780292:170781753:-	ENST00000341852	0.7	0.576	0.946	0.514	0.803	0.264	0.02	0.902	0.412	0.033	0.91	0.324	0.021	0.946	20.741	4.783	43.895	0.084	0.125	0	0.094	0	0	1	0	0	1	1	0.094	0.917	0.158	0	SE
ENSG00000154310	TNIK	ENST00000475336	CCDS54673.1	ALTERNATIVE:2	3	-	0.778,1.0,0.92,1.0,1.0,1.0,1.0,1.0,0.935,0.758	0.696,0.769,0.864,0.833,0.652,NA,1.0,0.949,0.636,0.846	0.134	0.000478	0.00952	chr3:170784365:170784524:-@chr3:170783976:170784115:-@chr3:170780292:170781753:-	ENST00000475336	0.7	0.576	0.946	0.514	0.799	0.255	0.02	0.886	0.418	0.033	0.91	0.328	0.021	0.946	20.639	4.686	43.895	0.084	0.125	0	0.094	0	0	1	0	0	1	1	0.094	0.917	0.158	0	SE
ENSG00000154310	TNIK	ENST00000284483	CCDS54679.1	ALTERNATIVE:2	3	-	0.778,1.0,0.92,1.0,1.0,1.0,1.0,1.0,0.935,0.758	0.696,0.769,0.864,0.833,0.652,NA,1.0,0.949,0.636,0.846	0.134	0.000478	0.00952	chr3:170784365:170784524:-@chr3:170783976:170784115:-@chr3:170780292:170781753:-	ENST00000284483	0.7	0.576	0.945	0.491	0.794	0.251	0.021	0.882	0.416	0.034	0.911	0.333	0.021	0.945	20.987	5.032	45.526	0.084	0.133	0	0.097	0	0	1	0	0	1	1	0.097	0.917	0.158	0	SE
ENSG00000163393	SLC22A15	NA	NA	NA	1	+	0.765,1.0,1.0,1.0,0.692,0.5,0.765,0.789,0.778,0.939	1.0,1.0,0.897,1.0,1.0,NA,0.579,0.897,1.0,1.0	-0.108	0.00162	0.0282	chr1:116563342:116563506:+@chr1:116569514:116569643:+@chr1:116574024:116574511:+	ENST00000369502	0.7	0.316	0.953	0.456	0.881	0.07	0.016	0.723	0.095	0.027	0.593	0.836	0.075	0.953	13.194	3.733	25.467	0.088	0.378	0	0.145	0	0	1	0	0	1	1	0.145	0.956	0.257	0	SE
ENSG00000198794	SCAMP5	NA	NA	NA	15	+	0.737,0.329,0.625,0.554,0.514,0.415,0.473,0.359,0.345,0.539	0.721,0.185,0.495,0.344,0.485,0.0,0.346,0.225,0.244,0.49	0.135	2.36e-176	5.89e-173	chr15:75305018:75305146:+@chr15:75308934:75309090:+@chr15:75310211:75310312:+	ENST00000562212	0.69	0.466	0.954	0.593	0.903	0.022	0.016	0.068	0.163	0.027	0.86	0.816	0.109	0.954	14.223	2.148	51.067	0.082	0.248	0	0.118	0	0	1	0	0	1	1	0.118	1	0.298	0	SE
ENSG00000198794	SCAMP5	NA	NA	NA	15	+	0.737,0.329,0.625,0.554,0.514,0.415,0.473,0.359,0.345,0.539	0.721,0.185,0.495,0.344,0.485,0.0,0.346,0.225,0.244,0.49	0.135	2.36e-176	5.89e-173	chr15:75305018:75305146:+@chr15:75308934:75309090:+@chr15:75310211:75310312:+	ENST00000564779	0.69	0.466	0.954	0.566	0.906	0.022	0.015	0.062	0.161	0.027	0.867	0.817	0.107	0.954	14.736	2.444	51.6	0.082	0.264	0	0.122	0	0	1	0	0	1	1	0.122	1	0.383	0	SE
ENSG00000138050	THUMPD2	NA	NA	NA	2	-	0.362,0.28,0.244,0.31,0.235,0.4,0.286,0.257,0.231,0.231	0.492,0.565,0.25,0.533,0.29,1.0,0.478,0.29,0.111,0.294	-0.147	2.55e-10	1.78e-08	chr2:39988471:39988558:-@chr2:39984388:39984508:-@chr2:39983029:39983100:-	ENST00000378727	0.69	0.153	0.895	0.882	0.888	0.054	0.047	0.061	0.888	0.882	0.895	0.058	0.055	0.061	47.145	25.871	64.87	0.618	0.903	0.799	0	0	6	0	1	1	0	0	0.799	0	0	0	SE
ENSG00000178104	PDE4DIP	ENST00000313382	CCDS55628.1	ALTERNATIVE:2	1	-	0.872,1.0,0.919,0.908,1.0,1.0,0.976,0.816,1.0,0.976	0.908,0.896,0.913,0.764,0.947,0.418,0.858,0.95,0.889,0.898	0.103	4.21e-10	2.87e-08	chr1:144854518:144854656:-@chr1:144854165:144854211:-@chr1:144851427:144852443:-	ENST00000313382	0.69	0.188	0.953	0.609	0.865	0.028	0.017	0.084	0.108	0.029	0.307	0.865	0.609	0.953	24.641	3.235	48.1	0.128	0.274	0	0.173	0	0	1	0	0	1	1	0.173	0	0	0	SE
ENSG00000118454	ANKRD13C	NA	NA	NA	1	-	0.844,0.843,0.719,0.797,0.895,1.0,0.72,0.828,0.593,0.803	0.95,0.873,1.0,1.0,0.905,NA,0.895,0.796,1.0,0.787	-0.108	4.12e-08	2.15e-06	chr1:70740403:70740501:-@chr1:70736539:70736639:-@chr1:70726271:70728530:-	ENST00000262346	0.69	0.528	0.95	0.512	0.86	0.114	0.017	0.854	0.271	0.03	0.916	0.615	0.018	0.95	20.607	2.765	46	0.086	0.111	0	0.097	0	0	1	0	0	1	1	0.097	1	0.13	0	SE
ENSG00000151806	GUF1	ENST00000281543	CCDS3468.1	PRINCIPAL:1	4	+	0.429,0.429,0.569,0.556,0.647,0.738,0.714,0.682,0.714,0.719	0.378,0.579,0.579,0.471,0.778,0.0,0.6,0.469,0.407,0.362	0.157	0.000149	0.00337	chr4:44688527:44688730:+@chr4:44690024:44690163:+@chr4:44691303:44691426:+	ENST00000281543	0.69	0.475	0.909	0.496	0.745	0.319	0.042	0.884	0.642	0.094	0.909	0.04	0.02	0.065	21.068	2.267	74.2	0.087	0.151	0	0.114	0	0	1	0	0	1	1	0.114	0.553	0.366	2.12766	SE
ENSG00000117569	PTBP2	ENST00000370197	CCDS72828.1	ALTERNATIVE:1	1	+	1.0,0.806,0.829,0.806,0.697,0.172,0.787,1.0,0.509,0.926	0.89,0.829,0.655,0.58,0.734,1.0,1.0,1.0,0.892,1.0	-0.105	0.000296	0.00624	chr1:97270341:97270495:+@chr1:97271975:97272008:+@chr1:97272422:97272514:+	ENST00000370197	0.69	0.513	0.937	0.61	0.828	0.043	0.024	0.093	0.309	0.038	0.837	0.648	0.107	0.937	15.723	4.059	49	0.086	0.129	0	0.101	0	0	1	0	0	1	1	0.101	0.417	0.089	0	SE
ENSG00000117569	PTBP2	ENST00000370198	CCDS72829.1	ALTERNATIVE:1	1	+	1.0,0.806,0.829,0.806,0.697,0.172,0.787,1.0,0.509,0.926	0.89,0.829,0.655,0.58,0.734,1.0,1.0,1.0,0.892,1.0	-0.105	0.000296	0.00624	chr1:97270341:97270495:+@chr1:97271975:97272008:+@chr1:97272422:97272514:+	ENST00000370198	0.69	0.513	0.932	0.604	0.821	0.046	0.024	0.097	0.311	0.042	0.833	0.643	0.108	0.932	15.547	4.118	48.737	0.086	0.13	0	0.101	0	0	1	0	0	1	1	0.101	0.417	0.089	0	SE
ENSG00000117569	PTBP2	ENST00000426398	CCDS754.1	PRINCIPAL:3	1	+	1.0,0.806,0.829,0.806,0.697,0.172,0.787,1.0,0.509,0.926	0.89,0.829,0.655,0.58,0.734,1.0,1.0,1.0,0.892,1.0	-0.105	0.000296	0.00624	chr1:97270341:97270495:+@chr1:97271975:97272008:+@chr1:97272422:97272514:+	ENST00000426398	0.69	0.513	0.934	0.587	0.821	0.045	0.024	0.101	0.308	0.04	0.838	0.647	0.106	0.934	15.815	4.176	48.632	0.085	0.128	0	0.101	0	0	1	0	0	1	1	0.101	0.417	0.089	0	SE
ENSG00000117569	PTBP2	NA	NA	NA	1	+	1.0,0.806,0.829,0.806,0.697,0.172,0.787,1.0,0.509,0.926	0.89,0.829,0.655,0.58,0.734,1.0,1.0,1.0,0.892,1.0	-0.105	0.000296	0.00624	chr1:97270341:97270495:+@chr1:97271975:97272008:+@chr1:97272422:97272514:+	ENST00000394184	0.69	0.513	0.935	0.583	0.819	0.049	0.024	0.117	0.306	0.04	0.831	0.645	0.107	0.935	15.794	4.412	48.579	0.086	0.129	0	0.101	0	0	1	0	0	1	1	0.101	0.417	0.089	0	SE
ENSG00000154310	TNIK	ENST00000436636	CCDS46956.1	PRINCIPAL:3	3	-	0.778,1.0,0.92,1.0,1.0,1.0,1.0,1.0,0.935,0.758	0.696,0.769,0.864,0.833,0.652,NA,1.0,0.949,0.636,0.846	0.134	0.000478	0.00952	chr3:170784365:170784524:-@chr3:170783976:170784115:-@chr3:170780292:170781753:-	ENST00000436636	0.69	0.576	0.944	0.49	0.78	0.245	0.02	0.886	0.41	0.035	0.911	0.345	0.023	0.944	20.848	5.143	43	0.084	0.126	0	0.096	0	0	1	0	0	1	1	0.096	0.917	0.158	0	SE
ENSG00000154310	TNIK	NA	NA	NA	3	-	0.778,1.0,0.92,1.0,1.0,1.0,1.0,1.0,0.935,0.758	0.696,0.769,0.864,0.833,0.652,NA,1.0,0.949,0.636,0.846	0.134	0.000478	0.00952	chr3:170784365:170784524:-@chr3:170783976:170784115:-@chr3:170780292:170781753:-	ENST00000538048	0.69	0.576	0.945	0.519	0.79	0.253	0.02	0.886	0.425	0.034	0.911	0.322	0.023	0.945	21.054	4.839	43.947	0.085	0.128	0	0.096	0	0	1	0	0	1	1	0.096	0.917	0.158	0	SE
ENSG00000154310	TNIK	NA	NA	NA	3	-	0.778,1.0,0.92,1.0,1.0,1.0,1.0,1.0,0.935,0.758	0.696,0.769,0.864,0.833,0.652,NA,1.0,0.949,0.636,0.846	0.134	0.000478	0.00952	chr3:170784365:170784524:-@chr3:170783976:170784115:-@chr3:170780292:170781753:-	ENST00000369326	0.69	0.576	0.946	0.514	0.801	0.257	0.02	0.891	0.418	0.034	0.912	0.325	0.021	0.946	20.896	4.8	43.947	0.085	0.129	0	0.096	0	0	1	0	0	1	1	0.096	0.917	0.158	0	SE
ENSG00000154310	TNIK	ENST00000470834	CCDS54675.1	ALTERNATIVE:2	3	-	0.778,1.0,0.92,1.0,1.0,1.0,1.0,1.0,0.935,0.758	0.696,0.769,0.864,0.833,0.652,NA,1.0,0.949,0.636,0.846	0.134	0.000478	0.00952	chr3:170784365:170784524:-@chr3:170783976:170784115:-@chr3:170780292:170781753:-	ENST00000470834	0.69	0.576	0.946	0.513	0.789	0.254	0.021	0.88	0.407	0.033	0.91	0.34	0.021	0.946	20.777	4.857	43.947	0.084	0.131	0	0.096	0	0	1	0	0	1	1	0.096	0.917	0.158	0	SE
ENSG00000154310	TNIK	ENST00000460047	CCDS54677.1	ALTERNATIVE:2	3	-	0.778,1.0,0.92,1.0,1.0,1.0,1.0,1.0,0.935,0.758	0.696,0.769,0.864,0.833,0.652,NA,1.0,0.949,0.636,0.846	0.134	0.000478	0.00952	chr3:170784365:170784524:-@chr3:170783976:170784115:-@chr3:170780292:170781753:-	ENST00000460047	0.69	0.576	0.945	0.49	0.777	0.224	0.02	0.88	0.441	0.035	0.911	0.335	0.022	0.945	20.164	3.13	42.947	0.083	0.13	0	0.096	0	0	1	0	0	1	1	0.096	0.917	0.158	0	SE
ENSG00000154310	TNIK	ENST00000357327	CCDS54676.1	ALTERNATIVE:2	3	-	0.778,1.0,0.92,1.0,1.0,1.0,1.0,1.0,0.935,0.758	0.696,0.769,0.864,0.833,0.652,NA,1.0,0.949,0.636,0.846	0.134	0.000478	0.00952	chr3:170784365:170784524:-@chr3:170783976:170784115:-@chr3:170780292:170781753:-	ENST00000357327	0.69	0.576	0.943	0.511	0.791	0.247	0.021	0.884	0.43	0.036	0.912	0.322	0.023	0.943	21.001	4.774	44.105	0.085	0.13	0	0.096	0	0	1	0	0	1	1	0.096	0.917	0.158	0	SE
ENSG00000151806	GUF1	ENST00000281543	CCDS3468.1	PRINCIPAL:1	4	+	0.382,0.474,0.5,1.0,0.818,1.0,0.909,0.407,0.625,0.684	0.419,0.412,0.2,0.769,0.0,NA,0.371,0.565,0.4,0.463	0.28	0.00211	0.0355	chr4:44680446:44680804:+@chr4:44682458:44682569:+@chr4:44682711:44682859:+	ENST00000281543	0.69	0.39	0.943	0.46	0.768	0.18	0.019	0.89	0.411	0.038	0.904	0.409	0.019	0.943	22.569	1.371	63.511	0.088	0.547	0.52	0.147	1	7	0.816	0.184	0.184	0.816	0.816	0.215	0.711	0.151	0	SE
ENSG00000069020	MAST4	NA	NA	NA	5	+	0.0,0.059,0.063,0.053,0.167,0.265,0.059,0.5,0.0,0.091	NA,0.143,0.778,0.75,0.875,1.0,0.1,0.304,0.158,0.7	-0.409	1.15e-81	1.14e-78	chr5:66195779:66195810:+@chr5:66259535:66259615:+@chr5:66282272:66282351:+	ENST00000407621	0.68	0.571	0.885	0.368	0.761	0.117	0.055	0.38	0.753	0.32	0.885	0.129	0.053	0.488	31.174	10.078	65.244	0.396	0.83	0.647	0.429	1	25	0.107	0.893	0.893	0.107	0.107	0.624	0	0	0	SE
ENSG00000069020	MAST4	NA	NA	NA	5	+	0.0,0.061,0.065,0.055,0.172,0.04,0.0,0.61,0.0,0.073	NA,0.148,0.758,0.758,0.871,1.0,0.148,0.313,0.163,0.709	-0.433	1.43e-26	2.92e-24	chr5:66195779:66195810:+@chr5:66259547:66259615:+@chr5:66282272:66282351:+	ENST00000434115	0.68	0.575	0.896	0.756	0.843	0.074	0.04	0.19	0.843	0.756	0.896	0.083	0.053	0.141	31.78	12.941	52.143	0.523	0.73	0.605	0	0	24	0	1	1	0	0	0.605	0	0	0	SE
ENSG00000109466	KLHL2	NA	NA	NA	4	+	0.98,0.87,0.805,0.905,0.745,1.0,0.63,0.798,0.642,0.921	0.967,0.941,1.0,0.917,1.0,NA,0.968,1.0,1.0,0.906	-0.137	8.02e-21	1.22e-18	chr4:166141086:166141211:+@chr4:166149959:166150065:+@chr4:166159930:166160051:+	ENST00000509704	0.68	0.306	0.944	0.504	0.833	0.33	0.019	0.929	0.242	0.034	0.924	0.428	0.02	0.944	18.762	2.148	72.733	0.099	0.22	0	0.118	0	0	1	0	0	1	1	0.118	1	0.336	0	SE
ENSG00000178104	PDE4DIP	ENST00000369354	CCDS30824.1	PRINCIPAL:3	1	-	0.872,1.0,0.919,0.908,1.0,1.0,0.976,0.816,1.0,0.976	0.908,0.896,0.913,0.764,0.947,0.418,0.858,0.95,0.889,0.898	0.103	4.21e-10	2.87e-08	chr1:144854518:144854656:-@chr1:144854165:144854211:-@chr1:144851427:144852443:-	ENST00000369354	0.68	0.188	0.951	0.54	0.842	0.03	0.017	0.095	0.129	0.031	0.365	0.842	0.54	0.951	24.561	3.176	48.2	0.134	0.291	0	0.182	0	0	1	0	0	1	1	0.182	0	0	0	SE
ENSG00000137210	TMEM14B	ENST00000379542	CCDS4515.1	PRINCIPAL:1	6	+	0.765,0.429,0.833,0.571,0.5,0.0,1.0,0.684,1.0,1.0	0.267,0.44,0.263,0.455,0.333,0.0,0.7,0.143,0.091,0.429	0.366	1.27e-07	6.23e-06	chr6:10747992:10748114:+@chr6:10755375:10755465:+@chr6:10770310:10770437:+	ENST00000379542	0.68	0.188	0.954	0.63	0.917	0.027	0.017	0.13	0.183	0.028	0.914	0.79	0.042	0.954	16.478	2.696	54.933	0.117	0.248	0	0.175	0	0	1	0	0	1	1	0.175	1	0.352	0	SE
ENSG00000153310	FAM49B	NA	NA	NA	8	-	0.711,0.833,0.725,0.743,0.853,0.275,0.813,0.668,0.726,0.826	0.695,0.893,0.792,0.85,0.887,1.0,0.941,0.842,0.794,0.804	-0.132	2.43e-07	1.15e-05	chr8:130915558:130915596:-@chr8:130891635:130891717:-@chr8:130883621:130883742:-	ENST00000518167	0.68	0.581	0.944	0.581	0.833	0.066	0.021	0.314	0.533	0.035	0.9	0.401	0.064	0.944	30.964	4.765	75.167	0.313	0.648	0.528	0.371	1	16	0.36	0.64	0.64	0.36	0.36	0.471	0.32	0.167	0	SE
ENSG00000176261	ZBTB8OS	NA	NA	NA	1	-	0.875,1.0,1.0,1.0,1.0,1.0,1.0,1.0,1.0,0.818	0.667,1.0,1.0,1.0,0.818,1.0,0.538,0.8,0.5,0.684	0.169	1.36e-06	5.71e-05	chr1:33116034:33116161:-@chr1:33099552:33099673:-@chr1:33097428:33097480:-	ENST00000373501	0.68	0.408	0.952	0.525	0.893	0.306	0.018	0.93	0.284	0.028	0.919	0.41	0.021	0.952	22.47	0.348	79.333	0.086	0.402	0	0.156	0	0	1	0	0	1	1	0.156	1	0.471	0	SE
ENSG00000100416	TRMU	NA	NA	NA	22	+	0.652,0.647,0.672,0.492,0.447,0.49,0.615,0.594,0.444,0.707	0.933,0.505,0.837,0.8,0.732,NA,0.741,0.784,0.714,0.608	-0.163	2.68e-05	0.00081	chr22:46733676:46733841:+@chr22:46739159:46739265:+@chr22:46742319:46742441:+	ENST00000457572	0.68	0.368	0.95	0.483	0.848	0.065	0.018	0.525	0.349	0.03	0.908	0.587	0.049	0.95	24.448	1.304	59.35	0.086	0.139	0	0.103	0	0	1	0	0	1	1	0.103	1	0.275	0	SE
ENSG00000100416	TRMU	NA	NA	NA	22	+	0.652,0.647,0.672,0.492,0.447,0.49,0.615,0.594,0.444,0.707	0.933,0.505,0.837,0.8,0.732,NA,0.741,0.784,0.714,0.608	-0.163	2.68e-05	0.00081	chr22:46733676:46733841:+@chr22:46739159:46739265:+@chr22:46742319:46742441:+	ENST00000424260	0.68	0.368	0.949	0.489	0.842	0.035	0.018	0.187	0.331	0.032	0.909	0.634	0.048	0.949	23.766	1.217	59.65	0.086	0.124	0	0.099	0	0	1	0	0	1	1	0.099	1	0.356	0	SE
ENSG00000204514	ZNF814	NA	NA	NA	19	-	0.837,0.721,0.632,0.862,0.688,0.75,0.667,0.556,0.773,0.783	0.591,0.711,0.571,0.432,0.857,0.261,0.806,0.561,0.889,0.59	0.1	0.000114	0.00264	chr19:58400135:58400175:-@chr19:58388284:58388410:-@chr19:58361688:58361929:-	ENST00000597348	0.68	0.151	0.954	0.545	0.888	0.228	0.018	0.917	0.132	0.028	0.91	0.641	0.018	0.954	14.507	3.742	46.789	0.085	0.426	0	0.115	1	0	1	0	0	1	1	0.115	0.953	1	0	SE
ENSG00000204514	ZNF814	NA	NA	NA	19	-	1.0,1.0,0.52,0.455,1.0,NA,0.545,0.333,0.684,0.765	0.75,0.889,0.765,0.655,1.0,1.0,1.0,0.846,0.667,0.818	-0.139	0.000227	0.00492	chr19:58400135:58400175:-@chr19:58388284:58388410:-@chr19:58370183:58370351:-	ENST00000597348	0.68	0.151	0.954	0.545	0.888	0.228	0.018	0.917	0.132	0.028	0.91	0.641	0.018	0.954	14.507	3.742	46.789	0.085	0.426	0	0.115	1	0	1	0	0	1	1	0.115	0.953	1	0	SE
ENSG00000198794	SCAMP5	ENST00000425597	CCDS45306.1	PRINCIPAL:1	15	+	0.737,0.329,0.625,0.554,0.514,0.415,0.473,0.359,0.345,0.539	0.721,0.185,0.495,0.344,0.485,0.0,0.346,0.225,0.244,0.49	0.135	2.36e-176	5.89e-173	chr15:75305018:75305146:+@chr15:75308934:75309090:+@chr15:75310211:75310312:+	ENST00000425597	0.67	0.466	0.954	0.588	0.903	0.022	0.016	0.07	0.162	0.027	0.861	0.816	0.11	0.954	14.737	2.593	54	0.082	0.262	0	0.122	0	0	1	0	0	1	1	0.122	1	0.312	0	SE
ENSG00000198794	SCAMP5	ENST00000361900	CCDS45306.1	PRINCIPAL:1	15	+	0.737,0.329,0.625,0.554,0.514,0.415,0.473,0.359,0.345,0.539	0.721,0.185,0.495,0.344,0.485,0.0,0.346,0.225,0.244,0.49	0.135	2.36e-176	5.89e-173	chr15:75305018:75305146:+@chr15:75308934:75309090:+@chr15:75310211:75310312:+	ENST00000361900	0.67	0.466	0.954	0.588	0.903	0.022	0.016	0.07	0.162	0.027	0.861	0.816	0.11	0.954	14.737	2.593	54	0.082	0.262	0	0.122	0	0	1	0	0	1	1	0.122	1	0.312	0	SE
ENSG00000163607	GTPBP8	ENST00000383678	CCDS33820.1	PRINCIPAL:1	3	+	0.652,0.6,0.852,0.923,0.529,0.63,0.586,0.647,0.667,0.586	0.727,1.0,1.0,1.0,0.882,NA,0.926,0.862,0.818,0.765	-0.219	2.74e-15	2.97e-13	chr3:112709832:112710182:+@chr3:112713982:112714112:+@chr3:112715739:112715838:+	ENST00000383678	0.67	0.416	0.951	0.504	0.828	0.264	0.019	0.919	0.406	0.031	0.925	0.33	0.02	0.951	23.727	1.677	67.3	0.084	0.133	0	0.098	0	0	1	0	0	1	1	0.098	1	0.388	0	SE
ENSG00000108854	SMURF2	ENST00000262435	CCDS32707.1	PRINCIPAL:1	17	-	0.712,0.822,0.692,0.598,1.0,1.0,1.0,0.708,1.0,0.708	1.0,1.0,0.933,0.665,1.0,NA,1.0,1.0,1.0,1.0	-0.131	1.48e-12	1.27e-10	chr17:62657947:62658186:-@chr17:62602720:62602758:-@chr17:62594500:62594608:-	ENST00000262435	0.67	0.469	0.917	0.587	0.801	0.227	0.036	0.917	0.647	0.062	0.915	0.126	0.02	0.373	20.139	0.839	43.75	0.096	0.161	0	0.115	0	0	1	0	0	1	1	0.115	1	0.156	0	SE
ENSG00000178104	PDE4DIP	ENST00000369359	-	ALTERNATIVE:2	1	-	0.872,1.0,0.919,0.908,1.0,1.0,0.976,0.816,1.0,0.976	0.908,0.896,0.913,0.764,0.947,0.418,0.858,0.95,0.889,0.898	0.103	4.21e-10	2.87e-08	chr1:144854518:144854656:-@chr1:144854165:144854211:-@chr1:144851427:144852443:-	ENST00000369359	0.67	0.188	0.947	0.497	0.802	0.029	0.016	0.089	0.169	0.035	0.415	0.802	0.497	0.947	24.688	3.882	46.25	0.139	0.217	0	0.165	0	0	1	0	0	1	1	0.165	0	0	0	SE
ENSG00000153310	FAM49B	NA	NA	NA	8	-	0.711,0.833,0.725,0.743,0.853,0.275,0.813,0.668,0.726,0.826	0.695,0.893,0.792,0.85,0.887,1.0,0.941,0.842,0.794,0.804	-0.132	2.43e-07	1.15e-05	chr8:130915558:130915596:-@chr8:130891635:130891717:-@chr8:130883621:130883742:-	ENST00000520254	0.67	0.581	0.944	0.522	0.829	0.074	0.021	0.375	0.54	0.034	0.897	0.386	0.065	0.944	29.208	4.353	72.778	0.265	0.652	0.529	0.327	1	15	0.423	0.577	0.577	0.423	0.423	0.443	0.346	0.148	0	SE
ENSG00000198814	GK	NA	NA	NA	X	+	0.454,0.134,0.352,0.155,0.208,0.6,0.31,0.321,0.189,0.369	0.479,0.337,0.543,0.363,0.779,NA,0.348,0.697,0.219,0.262	-0.138	1.19e-06	5.06e-05	chrX:30714734:30714800:+@chrX:30715849:30715866:+@chrX:30718531:30718566:+	ENST00000378946	0.67	0.359	0.81	0.528	0.696	0.201	0.049	0.528	0.677	0.394	0.81	0.122	0.069	0.184	35.323	11.459	50.667	0.132	0.45	0	0.267	0	0	1	0	0	1	1	0.267	1	0.027	0	SE
ENSG00000198814	GK	NA	NA	NA	X	+	0.454,0.134,0.352,0.155,0.208,0.6,0.31,0.321,0.189,0.369	0.479,0.337,0.543,0.363,0.779,NA,0.348,0.697,0.219,0.262	-0.138	1.19e-06	5.06e-05	chrX:30714734:30714800:+@chrX:30715849:30715866:+@chrX:30718531:30718566:+	ENST00000427190	0.67	0.359	0.873	0.524	0.728	0.222	0.054	0.533	0.709	0.399	0.873	0.07	0.06	0.08	35.167	14.486	50.615	0.128	0.456	0	0.268	0	0	1	0	0	1	1	0.268	1	0.104	0	SE
ENSG00000177225	PDDC1	NA	NA	NA	11	-	0.96,1.0,0.91,1.0,0.905,1.0,1.0,0.87,0.963,0.892	0.97,0.941,0.848,0.968,0.913,0.0,1.0,0.83,0.889,0.927	0.121	4.66e-06	0.000175	chr11:777399:777484:-@chr11:775066:775142:-@chr11:774008:774113:-	ENST00000397472	0.67	0.179	0.935	0.488	0.785	0.24	0.021	0.909	0.351	0.044	0.901	0.41	0.021	0.935	16.256	3.333	45.2	0.083	0.319	0	0.108	0	0	1	0	0	1	1	0.108	0	0	0	SE
ENSG00000166887	VPS39	NA	NA	NA	15	-	0.411,0.318,0.411,0.368,0.523,0.0,0.276,0.601,0.648,0.311	0.482,0.494,0.656,0.431,0.318,NA,0.393,0.764,0.777,0.752	-0.176	3.23e-05	0.000943	chr15:42492094:42492159:-@chr15:42484264:42484296:-@chr15:42483694:42483758:-	ENST00000348544	0.67	0.39	0.89	0.842	0.875	0.057	0.043	0.099	0.875	0.842	0.89	0.069	0.059	0.083	56.894	36.516	74.105	0.67	0.841	0.785	0	0	12	0	1	1	0	0	0.785	1	0.045	0	SE
ENSG00000069020	MAST4	NA	NA	NA	5	+	0.0,0.059,0.063,0.053,0.167,0.265,0.059,0.5,0.0,0.091	NA,0.143,0.778,0.75,0.875,1.0,0.1,0.304,0.158,0.7	-0.409	1.15e-81	1.14e-78	chr5:66195779:66195810:+@chr5:66259535:66259615:+@chr5:66282272:66282351:+	ENST00000450827	0.66	0.571	0.898	0.453	0.748	0.084	0.041	0.287	0.697	0.242	0.898	0.219	0.056	0.69	35.441	13.478	70.222	0.575	0.675	0.632	0	0	28	0	1	1	0	0	0.632	0	0	0	SE
ENSG00000025434	NR1H3	ENST00000441012	CCDS7929.1	PRINCIPAL:1	11	+	1.0,0.933,0.829,1.0,0.909,1.0,0.887,0.867,0.947,1.0	0.892,0.704,0.556,0.818,0.84,0.276,0.964,1.0,0.619,0.905	0.18	8.33e-15	8.65e-13	chr11:47282792:47283000:+@chr11:47283098:47283277:+@chr11:47283470:47283569:+	ENST00000441012	0.66	0.433	0.954	0.499	0.877	0.03	0.018	0.135	0.31	0.028	0.901	0.66	0.052	0.954	23.008	2.516	56.483	0.099	0.531	0.521	0.142	1	11	0.82	0.18	0.18	0.82	0.82	0.211	0.852	0.284	0	SE
ENSG00000025434	NR1H3	ENST00000467728	CCDS7929.1	PRINCIPAL:1	11	+	1.0,0.933,0.829,1.0,0.909,1.0,0.887,0.867,0.947,1.0	0.892,0.704,0.556,0.818,0.84,0.276,0.964,1.0,0.619,0.905	0.18	8.33e-15	8.65e-13	chr11:47282792:47283000:+@chr11:47283098:47283277:+@chr11:47283470:47283569:+	ENST00000467728	0.66	0.433	0.954	0.499	0.877	0.03	0.018	0.135	0.31	0.028	0.901	0.66	0.052	0.954	23.008	2.516	56.483	0.099	0.531	0.521	0.142	1	11	0.82	0.18	0.18	0.82	0.82	0.211	0.852	0.284	0	SE
ENSG00000267106	C19orf82	ENST00000592851	CCDS59350.1	PRINCIPAL:2	19	+	1.0,1.0,1.0,1.0,0.765,1.0,0.75,1.0,0.556,1.0	0.913,1.0,0.538,0.765,0.941,0.0,0.857,1.0,1.0,0.714	0.134	8.39e-08	4.19e-06	chr19:9732181:9732321:+@chr19:9737460:9737536:+@chr19:9738392:9738482:+	ENST00000592851	0.66	-0.002	0.947	0.545	0.816	0.027	0.019	0.081	0.259	0.035	0.853	0.713	0.124	0.947	30.738	4.741	67.667	0.185	0.319	0	0.244	0	0	1	0	0	1	1	0.244	0	0	0	SE
ENSG00000137210	TMEM14B	NA	NA	NA	6	+	0.765,0.429,0.833,0.571,0.5,0.0,1.0,0.684,1.0,1.0	0.267,0.44,0.263,0.455,0.333,0.0,0.7,0.143,0.091,0.429	0.366	1.27e-07	6.23e-06	chr6:10747992:10748114:+@chr6:10755375:10755465:+@chr6:10770310:10770437:+	ENST00000473276	0.66	0.188	0.867	0.391	0.713	0.437	0.04	0.859	0.275	0.039	0.867	0.288	0.023	0.864	13.972	1.037	40.711	0.079	0.443	0	0.124	1	0	1	0	0	1	1	0.124	0	0	0	SE
ENSG00000136270	TBRG4	ENST00000494076	CCDS5501.1	PRINCIPAL:1	7	-	0.478,0.667,0.808,0.742,0.713,0.347,0.69,0.726,0.667,0.756	0.581,0.806,0.804,0.808,0.786,1.0,0.662,0.75,0.809,0.791	-0.12	1.31e-07	6.38e-06	chr7:45145040:45145363:-@chr7:45143698:45143855:-@chr7:45142932:45143042:-	ENST00000494076	0.66	0.215	0.952	0.519	0.903	0.026	0.017	0.088	0.234	0.028	0.914	0.74	0.057	0.952	25.004	1.484	64.261	0.101	0.165	0	0.124	0	0	1	0	0	1	1	0.124	0	0	0	SE
ENSG00000177225	PDDC1	NA	NA	NA	11	-	0.96,1.0,0.91,1.0,0.905,1.0,1.0,0.87,0.963,0.892	0.97,0.941,0.848,0.968,0.913,0.0,1.0,0.83,0.889,0.927	0.121	4.66e-06	0.000175	chr11:777399:777484:-@chr11:775066:775142:-@chr11:774008:774113:-	ENST00000354286	0.66	0.179	0.933	0.45	0.755	0.162	0.021	0.787	0.412	0.046	0.914	0.425	0.023	0.933	20.362	1.391	43.111	0.082	0.194	0	0.116	0	0	1	0	0	1	1	0.116	0	0	0	SE
ENSG00000177225	PDDC1	NA	NA	NA	11	-	0.96,1.0,0.91,1.0,0.905,1.0,1.0,0.87,0.963,0.892	0.97,0.941,0.848,0.968,0.913,0.0,1.0,0.83,0.889,0.927	0.121	4.66e-06	0.000175	chr11:777399:777484:-@chr11:775066:775142:-@chr11:774008:774113:-	ENST00000524550	0.66	0.179	0.933	0.45	0.755	0.162	0.021	0.787	0.412	0.046	0.914	0.425	0.023	0.933	20.362	1.391	43.111	0.082	0.194	0	0.116	0	0	1	0	0	1	1	0.116	0	0	0	SE
ENSG00000100416	TRMU	NA	NA	NA	22	+	0.652,0.647,0.672,0.492,0.447,0.49,0.615,0.594,0.444,0.707	0.933,0.505,0.837,0.8,0.732,NA,0.741,0.784,0.714,0.608	-0.163	2.68e-05	0.00081	chr22:46733676:46733841:+@chr22:46739159:46739265:+@chr22:46742319:46742441:+	ENST00000381019	0.66	0.368	0.95	0.509	0.845	0.033	0.018	0.135	0.331	0.032	0.908	0.637	0.047	0.95	22.847	1.043	62.95	0.083	0.111	0	0.093	0	0	1	0	0	1	1	0.093	1	0.106	0	SE
ENSG00000143450	OAZ3	ENST00000321531	CCDS58028.1	PRINCIPAL:3	1	+	0.9,0.5,0.692,0.333,0.778,0.188,0.778,0.692,0.8,0.75	0.786,0.529,0.765,0.905,0.75,1.0,0.707,0.882,1.0,0.941	-0.185	5.25e-05	0.00141	chr1:151739701:151739775:+@chr1:151740534:151740709:+@chr1:151742648:151742733:+	ENST00000321531	0.66	0.335	0.925	0.493	0.803	0.417	0.028	0.925	0.481	0.051	0.923	0.102	0.02	0.731	29.746	2.095	82.087	0.09	0.569	0.521	0.189	1	15	0.75	0.25	0.25	0.75	0.75	0.272	0.333	0.244	0	SE
ENSG00000184060	ADAP2	ENST00000580525	-	ALTERNATIVE:2	17	+	0.778,0.867,0.867,1.0,1.0,1.0,0.778,0.727,1.0,0.905	0.7,0.824,0.786,0.931,0.4,NA,1.0,0.907,0.538,0.824	0.124	9.78e-05	0.00229	chr17:29249958:29250088:+@chr17:29253827:29253936:+@chr17:29258907:29258986:+	ENST00000580525	0.66	0.319	0.949	0.495	0.892	0.03	0.017	0.109	0.363	0.032	0.902	0.608	0.055	0.949	25.985	3.143	54.205	0.094	0.236	0	0.136	0	0	1	0	0	1	1	0.136	1	0.325	0	SE
ENSG00000197535	MYO5A	NA	NA	NA	15	-	0.098,0.36,0.286,0.189,0.038,NA,0.316,0.132,0.178,0.108	0.16,0.0,0.158,0.12,0.1,0.0,0.077,0.0,0.027,0.069	0.118	0.000113	0.0026	chr15:52638558:52638658:-@chr15:52635314:52635394:-@chr15:52632393:52632591:-	ENST00000358212	0.66	0.465	0.952	0.485	0.815	0.032	0.018	0.079	0.342	0.03	0.827	0.626	0.145	0.952	30.611	9.941	51.026	0.216	0.545	0.519	0.316	1	9	0.679	0.321	0.321	0.679	0.679	0.381	0	0	0	SE
ENSG00000128641	MYO1B	ENST00000392318	CCDS46477.1	PRINCIPAL:1	2	+	0.223,0.269,0.346,0.279,0.346,0.542,0.376,0.297,0.343,0.362	0.17,0.193,0.219,0.237,0.369,0.0,0.309,0.238,0.255,0.319	0.107	1.32e-16	1.58e-14	chr2:192265108:192265194:+@chr2:192267358:192267444:+@chr2:192272841:192272915:+	ENST00000392318	0.65	0.51	0.952	0.795	0.927	0.019	0.018	0.031	0.054	0.029	0.178	0.927	0.795	0.952	30.149	3.429	60.267	0.129	0.28	0	0.207	0	0	1	0	0	1	1	0.207	0	0	0	SE
ENSG00000128641	MYO1B	ENST00000304164	CCDS46477.1	PRINCIPAL:1	2	+	0.223,0.269,0.346,0.279,0.346,0.542,0.376,0.297,0.343,0.362	0.17,0.193,0.219,0.237,0.369,0.0,0.309,0.238,0.255,0.319	0.107	1.32e-16	1.58e-14	chr2:192265108:192265194:+@chr2:192267358:192267444:+@chr2:192272841:192272915:+	ENST00000304164	0.65	0.51	0.952	0.795	0.927	0.019	0.018	0.031	0.054	0.029	0.178	0.927	0.795	0.952	30.149	3.429	60.267	0.129	0.28	0	0.207	0	0	1	0	0	1	1	0.207	0	0	0	SE
ENSG00000128641	MYO1B	NA	NA	NA	2	+	0.223,0.269,0.346,0.279,0.346,0.542,0.376,0.297,0.343,0.362	0.17,0.193,0.219,0.237,0.369,0.0,0.309,0.238,0.255,0.319	0.107	1.32e-16	1.58e-14	chr2:192265108:192265194:+@chr2:192267358:192267444:+@chr2:192272841:192272915:+	ENST00000439065	0.65	0.51	0.955	0.904	0.946	0.018	0.017	0.019	0.036	0.027	0.078	0.946	0.904	0.955	28.087	2.171	64.089	0.105	0.234	0	0.165	0	0	1	0	0	1	1	0.165	0	0	0	SE
ENSG00000178104	PDE4DIP	ENST00000530740	-	ALTERNATIVE:2	1	-	0.872,1.0,0.919,0.908,1.0,1.0,0.976,0.816,1.0,0.976	0.908,0.896,0.913,0.764,0.947,0.418,0.858,0.95,0.889,0.898	0.103	4.21e-10	2.87e-08	chr1:144854518:144854656:-@chr1:144854165:144854211:-@chr1:144851427:144852443:-	ENST00000530740	0.65	0.188	0.951	0.572	0.823	0.04	0.017	0.18	0.21	0.03	0.722	0.75	0.157	0.951	25.166	3.706	49.05	0.135	0.419	0	0.202	0	0	1	0	0	1	1	0.202	0	0	0	SE
ENSG00000153310	FAM49B	NA	NA	NA	8	-	0.711,0.833,0.725,0.743,0.853,0.275,0.813,0.668,0.726,0.826	0.695,0.893,0.792,0.85,0.887,1.0,0.941,0.842,0.794,0.804	-0.132	2.43e-07	1.15e-05	chr8:130915558:130915596:-@chr8:130891635:130891717:-@chr8:130883621:130883742:-	ENST00000517672	0.65	0.581	0.943	0.585	0.817	0.061	0.021	0.301	0.53	0.035	0.893	0.408	0.07	0.943	31.328	5.059	75.167	0.345	0.667	0.53	0.382	1	17	0.32	0.68	0.68	0.32	0.32	0.483	0.32	0.174	0	SE
ENSG00000076554	TPD52	NA	NA	NA	8	-	0.2,0.16,0.339,0.27,0.231,0.27,0.247,0.144,0.246,0.234	0.246,0.322,0.264,0.39,0.341,0.934,0.27,0.417,0.353,0.352	-0.155	8.25e-06	0.000294	chr8:80963762:80963863:-@chr8:80962680:80962706:-@chr8:80956402:80956443:-	ENST00000518937	0.65	0.544	0.79	0.541	0.669	0.119	0.032	0.322	0.557	0.178	0.778	0.325	0.074	0.79	35.057	16.571	52.348	0.251	0.35	0	0.311	0	0	1	0	0	1	1	0.311	1	0.054	0	SE
ENSG00000148950	IMMP1L	NA	NA	NA	11	-	0.793,0.909,0.803,0.955,0.93,0.68,0.875,0.833,1.0,0.859	0.733,0.956,0.667,0.72,0.857,0.667,0.747,0.714,0.818,0.708	0.105	1.41e-05	0.000477	chr11:31531066:31531139:-@chr11:31484719:31484852:-@chr11:31477860:31477933:-	ENST00000526776	0.65	0.417	0.918	0.531	0.789	0.389	0.038	0.896	0.564	0.08	0.918	0.046	0.017	0.132	26.966	1.677	65	0.106	0.841	0.664	0.232	1	8	0.778	0.222	0.222	0.778	0.778	0.328	0	0	0	SE
ENSG00000099998	GGT5	ENST00000398292	CCDS42990.1	ALTERNATIVE:2	22	-	0.889,0.844,0.789,1.0,0.773,0.111,0.765,0.563,0.699,0.8	0.9,0.887,1.0,0.778,0.758,NA,1.0,1.0,1.0,0.714	-0.17	0.000295	0.00621	chr22:24629842:24629972:-@chr22:24629466:24629561:-@chr22:24628791:24628986:-	ENST00000398292	0.65	0.182	0.921	0.487	0.804	0.206	0.022	0.919	0.586	0.061	0.921	0.208	0.02	0.814	28.301	2.471	64.611	0.092	0.495	0	0.267	0	0	1	0	0	1	1	0.267	1	0.063	0	SE
ENSG00000128641	MYO1B	NA	NA	NA	2	+	0.223,0.269,0.346,0.279,0.346,0.542,0.376,0.297,0.343,0.362	0.17,0.193,0.219,0.237,0.369,0.0,0.309,0.238,0.255,0.319	0.107	1.32e-16	1.58e-14	chr2:192265108:192265194:+@chr2:192267358:192267444:+@chr2:192272841:192272915:+	ENST00000392316	0.64	0.51	0.951	0.543	0.894	0.02	0.017	0.027	0.09	0.031	0.543	0.89	0.432	0.951	30.198	8.353	55.733	0.15	0.458	0	0.315	0	0	1	0	0	1	1	0.315	0	0	0	SE
ENSG00000122643	NT5C3A	NA	NA	NA	7	-	0.564,0.686,0.673,0.813,0.568,0.723,0.681,0.721,0.657,0.766	0.385,0.341,0.564,0.54,0.649,0.0,0.569,0.541,0.492,0.539	0.223	4.57e-14	4.43e-12	chr7:33102180:33102408:-@chr7:33075546:33075600:-@chr7:33066429:33066527:-	ENST00000456458	0.64	0.432	0.876	0.693	0.806	0.543	0.086	0.85	0.428	0.124	0.876	0.029	0.022	0.039	28.532	19.829	35.5	0.515	0.576	0.54	0	0	3	0	1	1	0	0	0.54	0	0	0	SE
ENSG00000122417	ODF2L	NA	NA	NA	1	-	0.889,0.833,0.692,0.68,0.565,0.273,0.625,0.704,0.905,0.61	1.0,1.0,1.0,0.824,0.647,NA,0.818,0.889,0.818,0.586	-0.165	9.82e-10	6.4e-08	chr1:86852598:86852769:-@chr1:86851141:86851273:-@chr1:86850359:86850484:-	ENST00000359242	0.64	0.336	0.954	0.626	0.909	0.019	0.017	0.023	0.072	0.028	0.352	0.909	0.626	0.954	27.7	4.238	66	0.126	0.512	0.509	0.205	1	5	0.889	0.111	0.111	0.889	0.889	0.239	0	0	0	SE
ENSG00000137210	TMEM14B	NA	NA	NA	6	+	0.765,0.429,0.833,0.571,0.5,0.0,1.0,0.684,1.0,1.0	0.267,0.44,0.263,0.455,0.333,0.0,0.7,0.143,0.091,0.429	0.366	1.27e-07	6.23e-06	chr6:10747992:10748114:+@chr6:10755375:10755465:+@chr6:10770310:10770437:+	ENST00000481240	0.64	0.188	0.905	0.455	0.666	0.174	0.032	0.718	0.518	0.168	0.905	0.308	0.035	0.785	23.316	8.762	50.311	0.117	0.447	0	0.212	0	0	1	0	0	1	1	0.212	0	0	0	SE
ENSG00000134058	CDK7	ENST00000256443	CCDS3999.1	PRINCIPAL:1	5	+	0.91,0.556,1.0,0.422,0.862,1.0,1.0,1.0,0.343,0.851	0.807,1.0,1.0,1.0,1.0,NA,1.0,1.0,0.566,1.0	-0.136	2.41e-07	1.14e-05	chr5:68548245:68548278:+@chr5:68551287:68551355:+@chr5:68553870:68553980:+	ENST00000256443	0.64	0.501	0.932	0.485	0.778	0.178	0.024	0.811	0.451	0.043	0.895	0.371	0.026	0.932	17.939	1.806	58.1	0.09	0.112	0	0.098	0	0	1	0	0	1	1	0.098	1	0.085	0	SE
ENSG00000153310	FAM49B	ENST00000519824	CCDS6361.1	PRINCIPAL:1	8	-	0.711,0.833,0.725,0.743,0.853,0.275,0.813,0.668,0.726,0.826	0.695,0.893,0.792,0.85,0.887,1.0,0.941,0.842,0.794,0.804	-0.132	2.43e-07	1.15e-05	chr8:130915558:130915596:-@chr8:130891635:130891717:-@chr8:130883621:130883742:-	ENST00000519824	0.64	0.581	0.944	0.58	0.814	0.123	0.021	0.681	0.475	0.035	0.895	0.402	0.057	0.944	27.795	4.714	70.526	0.171	0.66	0.539	0.264	1	13	0.48	0.52	0.52	0.48	0.48	0.407	0.32	0.026	0	SE
ENSG00000153310	FAM49B	ENST00000519110	CCDS6361.1	PRINCIPAL:1	8	-	0.711,0.833,0.725,0.743,0.853,0.275,0.813,0.668,0.726,0.826	0.695,0.893,0.792,0.85,0.887,1.0,0.941,0.842,0.794,0.804	-0.132	2.43e-07	1.15e-05	chr8:130915558:130915596:-@chr8:130891635:130891717:-@chr8:130883621:130883742:-	ENST00000519110	0.64	0.581	0.944	0.58	0.814	0.123	0.021	0.681	0.475	0.035	0.895	0.402	0.057	0.944	27.795	4.714	70.526	0.171	0.66	0.539	0.264	1	13	0.48	0.52	0.52	0.48	0.48	0.407	0.32	0.026	0	SE
ENSG00000153310	FAM49B	ENST00000401979	CCDS6361.1	PRINCIPAL:1	8	-	0.711,0.833,0.725,0.743,0.853,0.275,0.813,0.668,0.726,0.826	0.695,0.893,0.792,0.85,0.887,1.0,0.941,0.842,0.794,0.804	-0.132	2.43e-07	1.15e-05	chr8:130915558:130915596:-@chr8:130891635:130891717:-@chr8:130883621:130883742:-	ENST00000401979	0.64	0.581	0.944	0.58	0.814	0.123	0.021	0.681	0.475	0.035	0.895	0.402	0.057	0.944	27.795	4.714	70.526	0.171	0.66	0.539	0.264	1	13	0.48	0.52	0.52	0.48	0.48	0.407	0.32	0.026	0	SE
ENSG00000153310	FAM49B	ENST00000523509	CCDS6361.1	PRINCIPAL:1	8	-	0.711,0.833,0.725,0.743,0.853,0.275,0.813,0.668,0.726,0.826	0.695,0.893,0.792,0.85,0.887,1.0,0.941,0.842,0.794,0.804	-0.132	2.43e-07	1.15e-05	chr8:130915558:130915596:-@chr8:130891635:130891717:-@chr8:130883621:130883742:-	ENST00000523509	0.64	0.581	0.944	0.58	0.814	0.123	0.021	0.681	0.475	0.035	0.895	0.402	0.057	0.944	27.795	4.714	70.526	0.171	0.66	0.539	0.264	1	13	0.48	0.52	0.52	0.48	0.48	0.407	0.32	0.026	0	SE
ENSG00000153310	FAM49B	ENST00000522746	CCDS6361.1	PRINCIPAL:1	8	-	0.711,0.833,0.725,0.743,0.853,0.275,0.813,0.668,0.726,0.826	0.695,0.893,0.792,0.85,0.887,1.0,0.941,0.842,0.794,0.804	-0.132	2.43e-07	1.15e-05	chr8:130915558:130915596:-@chr8:130891635:130891717:-@chr8:130883621:130883742:-	ENST00000522746	0.64	0.581	0.944	0.58	0.814	0.123	0.021	0.681	0.475	0.035	0.895	0.402	0.057	0.944	27.795	4.714	70.526	0.171	0.66	0.539	0.264	1	13	0.48	0.52	0.52	0.48	0.48	0.407	0.32	0.026	0	SE
ENSG00000153310	FAM49B	ENST00000517654	CCDS6361.1	PRINCIPAL:1	8	-	0.711,0.833,0.725,0.743,0.853,0.275,0.813,0.668,0.726,0.826	0.695,0.893,0.792,0.85,0.887,1.0,0.941,0.842,0.794,0.804	-0.132	2.43e-07	1.15e-05	chr8:130915558:130915596:-@chr8:130891635:130891717:-@chr8:130883621:130883742:-	ENST00000517654	0.64	0.581	0.944	0.58	0.814	0.123	0.021	0.681	0.475	0.035	0.895	0.402	0.057	0.944	27.795	4.714	70.526	0.171	0.66	0.539	0.264	1	13	0.48	0.52	0.52	0.48	0.48	0.407	0.32	0.026	0	SE
ENSG00000148688	RPP30	ENST00000371703	CCDS7411.1	PRINCIPAL:1	10	+	0.76,0.75,0.912,0.922,0.938,0.604,0.806,0.907,1.0,0.769	0.849,0.932,0.951,0.894,0.924,1.0,0.951,1.0,0.935,0.966	-0.103	1.83e-05	0.000597	chr10:92654532:92654648:+@chr10:92655211:92655240:+@chr10:92655637:92655674:+	ENST00000371703	0.64	0.462	0.91	0.608	0.842	0.315	0.037	0.854	0.636	0.125	0.91	0.049	0.021	0.082	14.231	1.032	40.311	0.084	0.101	0	0.09	0	0	1	0	0	1	1	0.09	1	0.053	0	SE
ENSG00000148688	RPP30	NA	NA	NA	10	+	0.76,0.75,0.912,0.922,0.938,0.604,0.806,0.907,1.0,0.769	0.849,0.932,0.951,0.894,0.924,1.0,0.951,1.0,0.935,0.966	-0.103	1.83e-05	0.000597	chr10:92654532:92654648:+@chr10:92655211:92655240:+@chr10:92655637:92655674:+	ENST00000413330	0.64	0.462	0.913	0.641	0.848	0.323	0.042	0.868	0.629	0.111	0.913	0.047	0.021	0.081	13.712	1.097	40.044	0.082	0.1	0	0.088	0	0	1	0	0	1	1	0.088	1	0.053	0	SE
ENSG00000148688	RPP30	NA	NA	NA	10	+	0.76,0.75,0.912,0.922,0.938,0.604,0.806,0.907,1.0,0.769	0.849,0.932,0.951,0.894,0.924,1.0,0.951,1.0,0.935,0.966	-0.103	1.83e-05	0.000597	chr10:92654532:92654648:+@chr10:92655211:92655240:+@chr10:92655637:92655674:+	ENST00000277882	0.64	0.462	0.91	0.588	0.842	0.321	0.044	0.87	0.633	0.109	0.91	0.046	0.021	0.08	13.515	0.968	37.289	0.083	0.098	0	0.089	0	0	1	0	0	1	1	0.089	1	0.056	0	SE
ENSG00000010803	SCMH1	ENST00000402904	CCDS30688.1	PRINCIPAL:1	1	-	0.2,0.5,0.586,0.36,0.0,0.0,1.0,0.5,0.25,0.333	0.6,0.667,0.435,0.3,0.467,1.0,0.615,0.684,0.333,0.36	-0.173	0.00168	0.0291	chr1:41625397:41625605:-@chr1:41618271:41618413:-@chr1:41608550:41608784:-	ENST00000402904	0.64	0.551	0.912	0.517	0.755	0.219	0.027	0.912	0.602	0.062	0.904	0.179	0.024	0.687	23.413	2.963	59.8	0.138	0.636	0.549	0.201	1	4	0.846	0.154	0.154	0.846	0.846	0.255	0	0	0	SE
ENSG00000010803	SCMH1	ENST00000326197	CCDS30688.1	PRINCIPAL:1	1	-	0.2,0.5,0.586,0.36,0.0,0.0,1.0,0.5,0.25,0.333	0.6,0.667,0.435,0.3,0.467,1.0,0.615,0.684,0.333,0.36	-0.173	0.00168	0.0291	chr1:41625397:41625605:-@chr1:41618271:41618413:-@chr1:41608550:41608784:-	ENST00000326197	0.64	0.551	0.912	0.517	0.755	0.219	0.027	0.912	0.602	0.062	0.904	0.179	0.024	0.687	23.413	2.963	59.8	0.138	0.636	0.549	0.201	1	4	0.846	0.154	0.154	0.846	0.846	0.255	0	0	0	SE
ENSG00000151067	CACNA1C	ENST00000399617	CCDS53733.1	ALTERNATIVE:2	12	+	0.913,0.444,0.651,0.583,0.759,NA,0.848,0.863,0.863,0.62	0.88,0.848,0.852,1.0,0.848,NA,1.0,1.0,0.777,1.0	-0.185	4.54e-07	2.07e-05	chr12:2743463:2743546:+@chr12:2757641:2757673:+@chr12:2760806:2760913:+	ENST00000399617	0.63	0.594	0.895	0.781	0.845	0.073	0.037	0.115	0.845	0.781	0.895	0.082	0.059	0.141	43.215	19.111	65.5	0.544	0.633	0.605	0	0	12	0	1	1	0	0	0.605	1	0.045	0	SE
ENSG00000137814	HAUS2	NA	NA	NA	15	+	0.549,0.152,0.385,0.421,0.467,0.571,0.282,0.234,0.25,0.351	0.452,0.5,0.615,0.438,0.548,0.682,0.364,0.778,0.778,0.395	-0.189	0.000187	0.00413	chr15:42851537:42851606:+@chr15:42852980:42853068:+@chr15:42853468:42853600:+	ENST00000568846	0.63	0.022	0.953	0.565	0.906	0.021	0.018	0.028	0.138	0.028	0.883	0.842	0.091	0.953	25.925	3.481	56.05	0.108	0.312	0	0.14	0	0	1	0	0	1	1	0.14	0	0	0	SE
ENSG00000137814	HAUS2	NA	NA	NA	15	+	0.549,0.152,0.385,0.421,0.467,0.571,0.282,0.234,0.25,0.351	0.452,0.5,0.615,0.438,0.548,0.682,0.364,0.778,0.778,0.395	-0.189	0.000187	0.00413	chr15:42851537:42851606:+@chr15:42852980:42853068:+@chr15:42853468:42853600:+	ENST00000391623	0.63	0.022	0.953	0.565	0.906	0.021	0.018	0.028	0.138	0.028	0.883	0.842	0.091	0.953	25.925	3.481	56.05	0.108	0.312	0	0.14	0	0	1	0	0	1	1	0.14	0	0	0	SE
ENSG00000076685	NT5C2	NA	NA	NA	10	-	0.424,0.367,0.488,0.631,0.439,0.612,0.321,0.383,0.32,0.406	0.356,0.24,0.403,0.231,0.288,NA,0.432,0.356,0.155,0.283	0.134	0.000798	0.015	chr10:104899163:104899236:-@chr10:104871502:104871562:-@chr10:104866346:104866463:-	ENST00000461461	0.63	0.326	0.875	0.715	0.829	0.058	0.044	0.076	0.829	0.715	0.875	0.113	0.059	0.242	52.081	42.387	58.69	0.597	0.806	0.713	0	0	4	0	1	1	0	0	0.713	0	0	0	SE
ENSG00000163393	SLC22A15	ENST00000369503	CCDS44198.1	PRINCIPAL:1	1	+	0.765,1.0,1.0,1.0,0.692,0.5,0.765,0.789,0.778,0.939	1.0,1.0,0.897,1.0,1.0,NA,0.579,0.897,1.0,1.0	-0.108	0.00162	0.0282	chr1:116563342:116563506:+@chr1:116569514:116569643:+@chr1:116574024:116574511:+	ENST00000369503	0.63	0.316	0.954	0.758	0.943	0.018	0.016	0.019	0.039	0.027	0.225	0.943	0.758	0.954	14.438	3.733	24.222	0.088	0.126	0	0.103	0	0	1	0	0	1	1	0.103	1	0.13	0	SE
ENSG00000122417	ODF2L	NA	NA	NA	1	-	0.889,0.833,0.692,0.68,0.565,0.273,0.625,0.704,0.905,0.61	1.0,1.0,1.0,0.824,0.647,NA,0.818,0.889,0.818,0.586	-0.165	9.82e-10	6.4e-08	chr1:86852598:86852769:-@chr1:86851141:86851273:-@chr1:86850359:86850484:-	ENST00000317336	0.62	0.336	0.954	0.585	0.903	0.019	0.017	0.026	0.078	0.028	0.396	0.903	0.585	0.954	27.43	4.412	67.5	0.13	0.511	0.507	0.193	1	6	0.867	0.133	0.133	0.867	0.867	0.235	0	0	0	SE
ENSG00000122417	ODF2L	NA	NA	NA	1	-	0.889,0.833,0.692,0.68,0.565,0.273,0.625,0.704,0.905,0.61	1.0,1.0,1.0,0.824,0.647,NA,0.818,0.889,0.818,0.586	-0.165	9.82e-10	6.4e-08	chr1:86852598:86852769:-@chr1:86851141:86851273:-@chr1:86850359:86850484:-	ENST00000294678	0.62	0.336	0.954	0.5	0.911	0.019	0.017	0.025	0.07	0.028	0.475	0.911	0.5	0.954	27.34	4.571	66.167	0.122	0.506	0.505	0.208	1	4	0.911	0.089	0.089	0.911	0.911	0.234	0	0	0	SE
ENSG00000151067	CACNA1C	ENST00000402845	CCDS53735.1	ALTERNATIVE:2	12	+	0.913,0.444,0.651,0.583,0.759,NA,0.848,0.863,0.863,0.62	0.88,0.848,0.852,1.0,0.848,NA,1.0,1.0,0.777,1.0	-0.185	4.54e-07	2.07e-05	chr12:2743463:2743546:+@chr12:2757641:2757673:+@chr12:2760806:2760913:+	ENST00000402845	0.62	0.594	0.89	0.795	0.84	0.084	0.037	0.131	0.84	0.795	0.89	0.075	0.051	0.124	43.915	20.444	68.778	0.556	0.654	0.622	0	0	12	0	1	1	0	0	0.622	1	0.045	0	SE
ENSG00000150756	FAM173B	ENST00000511437	CCDS43301.1	PRINCIPAL:3	5	-	0.29,0.593,0.786,0.791,0.848,0.614,0.608,0.686,0.833,0.744	0.435,0.939,0.891,0.854,0.795,0.766,0.874,1.0,0.865,0.691	-0.132	2.8e-36	8.16e-34	chr5:10236590:10236727:-@chr5:10235323:10235373:-@chr5:10227692:10227759:-	ENST00000511437	0.61	0.19	0.935	0.636	0.852	0.285	0.019	0.926	0.474	0.046	0.899	0.241	0.024	0.935	17.149	1.097	54.444	0.087	0.107	0	0.097	0	0	1	0	0	1	1	0.097	0	0	0	SE
ENSG00000025434	NR1H3	NA	NA	NA	11	+	1.0,0.933,0.829,1.0,0.909,1.0,0.887,0.867,0.947,1.0	0.892,0.704,0.556,0.818,0.84,0.276,0.964,1.0,0.619,0.905	0.18	8.33e-15	8.65e-13	chr11:47282792:47283000:+@chr11:47283098:47283277:+@chr11:47283470:47283569:+	ENST00000395397	0.61	0.433	0.954	0.51	0.875	0.03	0.018	0.145	0.316	0.028	0.901	0.654	0.052	0.954	23.043	2.516	56.069	0.1	0.535	0.526	0.148	1	11	0.82	0.18	0.18	0.82	0.82	0.216	0.852	0.284	0	SE
ENSG00000122417	ODF2L	NA	NA	NA	1	-	0.889,0.833,0.692,0.68,0.565,0.273,0.625,0.704,0.905,0.61	1.0,1.0,1.0,0.824,0.647,NA,0.818,0.889,0.818,0.586	-0.165	9.82e-10	6.4e-08	chr1:86852598:86852769:-@chr1:86851141:86851273:-@chr1:86850359:86850484:-	ENST00000370567	0.61	0.336	0.954	0.492	0.892	0.019	0.017	0.025	0.089	0.028	0.486	0.892	0.492	0.954	27.589	4.118	67.389	0.133	0.514	0.508	0.197	1	6	0.867	0.133	0.133	0.867	0.867	0.239	0	0	0	SE
ENSG00000122417	ODF2L	NA	NA	NA	1	-	0.25,0.756,0.667,0.439,0.846,0.551,0.959,0.938,0.785,0.782	0.385,0.824,0.434,0.217,0.25,NA,0.842,0.744,0.867,0.771	0.105	1.62e-09	1.02e-07	chr1:86824470:86824574:-@chr1:86822127:86822285:-@chr1:86820457:86820542:-	ENST00000294678	0.61	0.303	0.953	0.872	0.942	0.019	0.018	0.021	0.039	0.029	0.108	0.942	0.872	0.953	29.437	4.294	56.6	0.136	0.47	0	0.232	0	0	1	0	0	1	1	0.232	0	0	0	SE
ENSG00000151067	CACNA1C	ENST00000399641	CCDS44787.1	ALTERNATIVE:2	12	+	0.913,0.444,0.651,0.583,0.759,NA,0.848,0.863,0.863,0.62	0.88,0.848,0.852,1.0,0.848,NA,1.0,1.0,0.777,1.0	-0.185	4.54e-07	2.07e-05	chr12:2743463:2743546:+@chr12:2757641:2757673:+@chr12:2760806:2760913:+	ENST00000399641	0.61	0.594	0.873	0.742	0.83	0.101	0.048	0.151	0.83	0.742	0.873	0.069	0.051	0.107	43.969	22.593	66.889	0.52	0.631	0.597	0	0	12	0	1	1	0	0	0.597	1	0.045	0	SE
ENSG00000151067	CACNA1C	ENST00000399597	CCDS44791.1	ALTERNATIVE:2	12	+	0.913,0.444,0.651,0.583,0.759,NA,0.848,0.863,0.863,0.62	0.88,0.848,0.852,1.0,0.848,NA,1.0,1.0,0.777,1.0	-0.185	4.54e-07	2.07e-05	chr12:2743463:2743546:+@chr12:2757641:2757673:+@chr12:2760806:2760913:+	ENST00000399597	0.61	0.594	0.893	0.82	0.851	0.069	0.034	0.099	0.851	0.82	0.893	0.08	0.056	0.117	46.041	22.222	69.5	0.57	0.715	0.659	0	0	12	0	1	1	0	0	0.659	1	0.045	0	SE
ENSG00000151067	CACNA1C	ENST00000399644	CCDS44798.1	ALTERNATIVE:2	12	+	0.913,0.444,0.651,0.583,0.759,NA,0.848,0.863,0.863,0.62	0.88,0.848,0.852,1.0,0.848,NA,1.0,1.0,0.777,1.0	-0.185	4.54e-07	2.07e-05	chr12:2743463:2743546:+@chr12:2757641:2757673:+@chr12:2760806:2760913:+	ENST00000399644	0.61	0.594	0.896	0.797	0.848	0.069	0.034	0.102	0.848	0.797	0.896	0.084	0.057	0.136	44.648	19.778	66.611	0.57	0.692	0.649	0	0	12	0	1	1	0	0	0.649	1	0.045	0	SE
ENSG00000176261	ZBTB8OS	ENST00000468695	CCDS365.1	PRINCIPAL:1	1	-	0.875,1.0,1.0,1.0,1.0,1.0,1.0,1.0,1.0,0.818	0.667,1.0,1.0,1.0,0.818,1.0,0.538,0.8,0.5,0.684	0.169	1.36e-06	5.71e-05	chr1:33116034:33116161:-@chr1:33099552:33099673:-@chr1:33097428:33097480:-	ENST00000468695	0.61	0.408	0.952	0.608	0.899	0.303	0.018	0.931	0.287	0.028	0.911	0.41	0.021	0.952	21.735	0.435	73.067	0.082	0.26	0	0.135	0	0	1	0	0	1	1	0.135	1	0.299	0	SE
ENSG00000136270	TBRG4	ENST00000494076	CCDS5501.1	PRINCIPAL:1	7	-	0.543,0.616,0.774,0.776,0.742,0.397,0.686,0.766,0.664,0.81	0.589,0.782,0.817,0.805,0.83,1.0,0.702,0.705,0.818,0.812	-0.109	1.49e-05	0.000497	chr7:45145040:45145363:-@chr7:45144137:45144308:-@chr7:45142630:45143042:-	ENST00000494076	0.61	0.309	0.954	0.514	0.887	0.023	0.017	0.079	0.187	0.027	0.894	0.79	0.084	0.954	20.033	1.13	63.043	0.092	0.131	0	0.104	0	0	1	0	0	1	1	0.104	0	0	0	SE
ENSG00000162241	SLC25A45	NA	NA	NA	11	-	0.933,0.926,0.68,0.684,0.92,0.125,0.917,0.826,1.0,0.854	1.0,0.733,0.833,0.867,0.789,1.0,1.0,1.0,1.0,0.862	-0.122	0.000143	0.00322	chr11:65147338:65147409:-@chr11:65146847:65147032:-@chr11:65144289:65144547:-	ENST00000360662	0.61	0.276	0.954	0.495	0.839	0.024	0.018	0.06	0.232	0.028	0.908	0.745	0.058	0.954	18.48	2.643	61.022	0.093	0.442	0	0.167	0	0	1	0	0	1	1	0.167	0.286	0.191	0	SE
ENSG00000162241	SLC25A45	NA	NA	NA	11	-	0.933,0.926,0.68,0.684,0.92,0.125,0.917,0.826,1.0,0.854	1.0,0.733,0.833,0.867,0.789,1.0,1.0,1.0,1.0,0.862	-0.122	0.000143	0.00322	chr11:65147338:65147409:-@chr11:65146847:65147032:-@chr11:65144289:65144547:-	ENST00000534028	0.61	0.276	0.954	0.495	0.839	0.024	0.018	0.06	0.232	0.028	0.908	0.745	0.058	0.954	18.48	2.643	61.022	0.093	0.442	0	0.167	0	0	1	0	0	1	1	0.167	0.286	0.191	0	SE
ENSG00000152061	RABGAP1L	NA	NA	NA	1	+	0.241,0.562,0.448,0.369,0.736,0.551,0.649,0.574,0.464,0.591	0.19,0.161,0.206,0.242,0.344,0.036,0.357,0.132,0.348,0.328	0.284	1.86e-41	6.58e-39	chr1:174780970:174781098:+@chr1:174846530:174846743:+@chr1:174926594:174926686:+	ENST00000465412	0.6	0.479	0.952	0.504	0.873	0.027	0.018	0.092	0.202	0.029	0.872	0.77	0.064	0.952	26.94	9.381	60.178	0.131	0.775	0.596	0.208	1	12	0.676	0.324	0.324	0.676	0.676	0.334	0	0	0	SE
ENSG00000053918	KCNQ1	ENST00000335475	-	ALTERNATIVE:2	11	+	1.0,0.905,0.873,0.923,0.913,1.0,0.938,1.0,0.885,0.917	0.565,0.892,0.95,0.846,0.913,0.538,0.943,0.721,0.922,0.807	0.126	1.42e-24	2.61e-22	chr11:2604665:2604775:+@chr11:2606442:2606537:+@chr11:2608800:2608922:+	ENST00000335475	0.6	0.277	0.951	0.507	0.823	0.023	0.015	0.035	0.25	0.03	0.871	0.727	0.102	0.951	24.085	2.4	51.65	0.102	0.261	0	0.176	0	0	1	0	0	1	1	0.176	0.364	0.053	0	SE
ENSG00000109466	KLHL2	ENST00000514860	CCDS54815.1	ALTERNATIVE:2	4	+	0.98,0.87,0.805,0.905,0.745,1.0,0.63,0.798,0.642,0.921	0.967,0.941,1.0,0.917,1.0,NA,0.968,1.0,1.0,0.906	-0.137	8.02e-21	1.22e-18	chr4:166141086:166141211:+@chr4:166149959:166150065:+@chr4:166159930:166160051:+	ENST00000514860	0.6	0.306	0.937	0.523	0.825	0.305	0.02	0.928	0.295	0.041	0.923	0.4	0.02	0.937	19.042	2.381	68.211	0.091	0.117	0	0.102	0	0	1	0	0	1	1	0.102	1	0.336	0	SE
ENSG00000125247	TMTC4	NA	NA	NA	13	-	0.6,1.0,1.0,1.0,0.75,1.0,0.333,0.548,1.0,0.706	0.75,0.5,0.789,0.652,0.333,NA,0.25,0.3,1.0,0.607	0.218	7.4e-09	4.28e-07	chr13:101326998:101327049:-@chr13:101322614:101322823:-@chr13:101320833:101321048:-	ENST00000475272	0.6	0.061	0.887	0.883	0.885	0.054	0.051	0.056	0.885	0.883	0.887	0.061	0.056	0.065	39.471	23.429	55.514	0.964	0.967	0.965	0	0	2	0	1	1	0	0	0.965	0	0	0	SE
ENSG00000136270	TBRG4	ENST00000258770	CCDS5501.1	PRINCIPAL:1	7	-	0.478,0.667,0.808,0.742,0.713,0.347,0.69,0.726,0.667,0.756	0.581,0.806,0.804,0.808,0.786,1.0,0.662,0.75,0.809,0.791	-0.12	1.31e-07	6.38e-06	chr7:45145040:45145363:-@chr7:45143698:45143855:-@chr7:45142932:45143042:-	ENST00000258770	0.6	0.215	0.951	0.544	0.905	0.025	0.017	0.069	0.252	0.029	0.912	0.723	0.061	0.951	22.821	1.391	54.609	0.093	0.126	0	0.107	0	0	1	0	0	1	1	0.107	0	0	0	SE
ENSG00000153310	FAM49B	NA	NA	NA	8	-	0.711,0.833,0.725,0.743,0.853,0.275,0.813,0.668,0.726,0.826	0.695,0.893,0.792,0.85,0.887,1.0,0.941,0.842,0.794,0.804	-0.132	2.43e-07	1.15e-05	chr8:130915558:130915596:-@chr8:130891635:130891717:-@chr8:130883621:130883742:-	ENST00000520204	0.6	0.581	0.945	0.478	0.799	0.139	0.021	0.723	0.46	0.034	0.901	0.401	0.039	0.945	28.602	4.059	68.944	0.216	0.656	0.537	0.313	1	13	0.48	0.52	0.52	0.48	0.48	0.429	0.32	0.096	0	SE
ENSG00000151067	CACNA1C	ENST00000399634	-	ALTERNATIVE:2	12	+	0.913,0.444,0.651,0.583,0.759,NA,0.848,0.863,0.863,0.62	0.88,0.848,0.852,1.0,0.848,NA,1.0,1.0,0.777,1.0	-0.185	4.54e-07	2.07e-05	chr12:2743463:2743546:+@chr12:2757641:2757673:+@chr12:2760806:2760913:+	ENST00000399634	0.6	0.594	0.883	0.703	0.809	0.091	0.042	0.177	0.809	0.703	0.883	0.1	0.056	0.222	42.789	18.519	64.111	0.512	0.578	0.608	0	1	11	0.083	0.917	0.917	0.083	0.083	0.558	1	0.045	0	SE
ENSG00000151067	CACNA1C	ENST00000327702	CCDS53736.1	ALTERNATIVE:2	12	+	0.913,0.444,0.651,0.583,0.759,NA,0.848,0.863,0.863,0.62	0.88,0.848,0.852,1.0,0.848,NA,1.0,1.0,0.777,1.0	-0.185	4.54e-07	2.07e-05	chr12:2743463:2743546:+@chr12:2757641:2757673:+@chr12:2760806:2760913:+	ENST00000327702	0.6	0.594	0.874	0.751	0.836	0.09	0.046	0.145	0.836	0.751	0.874	0.074	0.051	0.104	44.609	22.741	69.222	0.515	0.603	0.574	0	0	12	0	1	1	0	0	0.574	1	0.045	0	SE
ENSG00000165171	WBSCR27	ENST00000297873	CCDS5561.1	PRINCIPAL:1	7	-	0.739,0.412,0.676,1.0,0.84,0.396,0.846,0.907,1.0,0.652	0.765,0.714,0.478,0.615,0.412,0.0,1.0,0.65,0.818,0.63	0.139	3.96e-06	0.000152	chr7:73255400:73255528:-@chr7:73254744:73254879:-@chr7:73248920:73249332:-	ENST00000297873	0.6	0.133	0.945	0.542	0.822	0.169	0.018	0.77	0.486	0.035	0.919	0.345	0.025	0.945	30.706	1.514	72.87	0.085	0.265	0	0.138	0	0	1	0	0	1	1	0.138	1	0.469	0	SE
ENSG00000079150	FKBP7	NA	NA	NA	2	-	0.36,0.2,0.111,0.2,0.107,1.0,0.059,0.067,0.12,0.0	0.667,0.02,0.048,0.031,0.065,0.0,0.018,0.0,0.227,0.022	0.113	7.11e-05	0.00174	chr2:179341789:179341940:-@chr2:179337756:179337869:-@chr2:179334379:179334512:-	ENST00000233092	0.6	0.354	0.892	0.882	0.886	0.055	0.049	0.059	0.886	0.882	0.892	0.059	0.057	0.061	46.576	34.533	58.696	0.893	0.919	0.907	0	0	3	0	1	1	0	0	0.907	0	0	0	SE
ENSG00000170899	GSTA4	ENST00000370963	CCDS4948.1	PRINCIPAL:1	6	-	0.977,0.965,0.924,0.955,1.0,1.0,0.977,0.982,0.968,0.985	0.952,0.988,0.889,0.934,0.961,0.167,0.976,0.868,0.992,0.961	0.105	5.09e-13	4.57e-11	chr6:52858955:52859059:-@chr6:52852155:52852206:-@chr6:52850249:52850381:-	ENST00000370963	0.59	0.35	0.945	0.54	0.811	0.124	0.019	0.782	0.348	0.035	0.901	0.528	0.031	0.945	35.185	2.765	75.133	0.1	0.141	0	0.122	0	0	1	0	0	1	1	0.122	1	0.254	0	SE
ENSG00000170899	GSTA4	ENST00000370959	CCDS4948.1	PRINCIPAL:1	6	-	0.977,0.965,0.924,0.955,1.0,1.0,0.977,0.982,0.968,0.985	0.952,0.988,0.889,0.934,0.961,0.167,0.976,0.868,0.992,0.961	0.105	5.09e-13	4.57e-11	chr6:52858955:52859059:-@chr6:52852155:52852206:-@chr6:52850249:52850381:-	ENST00000370959	0.59	0.35	0.945	0.54	0.811	0.124	0.019	0.782	0.348	0.035	0.901	0.528	0.031	0.945	35.185	2.765	75.133	0.1	0.141	0	0.122	0	0	1	0	0	1	1	0.122	1	0.254	0	SE
ENSG00000074266	EED	NA	NA	NA	11	+	0.429,0.138,0.364,0.217,0.083,0.118,0.176,0.714,0.286,0.28	0.122,0.194,0.048,0.137,0.161,0.0,0.161,0.034,0.053,0.167	0.173	7.02e-10	4.68e-08	chr11:85979498:85979603:+@chr11:85981125:85981199:+@chr11:85988022:85988180:+	ENST00000351625	0.59	0.407	0.893	0.466	0.708	0.225	0.03	0.647	0.658	0.237	0.893	0.116	0.044	0.341	31.757	10.514	56.111	0.113	0.509	0.563	0.231	2	9	0.308	0.346	0.346	0.577	0.038	0.337	0	0	0	SE
ENSG00000153310	FAM49B	NA	NA	NA	8	-	0.711,0.833,0.725,0.743,0.853,0.275,0.813,0.668,0.726,0.826	0.695,0.893,0.792,0.85,0.887,1.0,0.941,0.842,0.794,0.804	-0.132	2.43e-07	1.15e-05	chr8:130915558:130915596:-@chr8:130891635:130891717:-@chr8:130883621:130883742:-	ENST00000523993	0.59	0.581	0.945	0.506	0.796	0.138	0.021	0.729	0.448	0.034	0.9	0.414	0.038	0.945	28.982	4.059	72.333	0.201	0.659	0.539	0.296	1	13	0.48	0.52	0.52	0.48	0.48	0.422	0.32	0.105	0	SE
ENSG00000151067	CACNA1C	ENST00000399601	CCDS44800.1	ALTERNATIVE:2	12	+	0.913,0.444,0.651,0.583,0.759,NA,0.848,0.863,0.863,0.62	0.88,0.848,0.852,1.0,0.848,NA,1.0,1.0,0.777,1.0	-0.185	4.54e-07	2.07e-05	chr12:2743463:2743546:+@chr12:2757641:2757673:+@chr12:2760806:2760913:+	ENST00000399601	0.59	0.594	0.877	0.728	0.823	0.108	0.044	0.176	0.823	0.728	0.877	0.069	0.051	0.113	42.62	20.296	62.667	0.517	0.603	0.576	0	0	12	0	1	1	0	0	0.576	1	0.045	0	SE
ENSG00000151067	CACNA1C	ENST00000347598	CCDS44788.1	PRINCIPAL:4	12	+	0.913,0.444,0.651,0.583,0.759,NA,0.848,0.863,0.863,0.62	0.88,0.848,0.852,1.0,0.848,NA,1.0,1.0,0.777,1.0	-0.185	4.54e-07	2.07e-05	chr12:2743463:2743546:+@chr12:2757641:2757673:+@chr12:2760806:2760913:+	ENST00000347598	0.59	0.594	0.871	0.735	0.817	0.106	0.045	0.203	0.817	0.735	0.871	0.077	0.051	0.109	44.183	20.444	65.556	0.521	0.59	0.571	0	0	12	0	1	1	0	0	0.571	1	0.057	0	SE
ENSG00000151067	CACNA1C	ENST00000399638	CCDS44790.1	ALTERNATIVE:2	12	+	0.913,0.444,0.651,0.583,0.759,NA,0.848,0.863,0.863,0.62	0.88,0.848,0.852,1.0,0.848,NA,1.0,1.0,0.777,1.0	-0.185	4.54e-07	2.07e-05	chr12:2743463:2743546:+@chr12:2757641:2757673:+@chr12:2760806:2760913:+	ENST00000399638	0.59	0.594	0.88	0.764	0.828	0.112	0.055	0.177	0.828	0.764	0.88	0.059	0.044	0.083	44.175	21.852	68.111	0.522	0.585	0.566	0	0	12	0	1	1	0	0	0.566	1	0.057	0	SE
ENSG00000116138	DNAJC16	ENST00000375847	CCDS30606.1	PRINCIPAL:1	1	+	0.76,1.0,0.524,0.625,0.579,1.0,0.514,0.84,0.667,0.7	0.905,1.0,1.0,0.8,1.0,NA,0.692,0.84,0.429,0.818	-0.111	0.000896	0.0166	chr1:15853308:15853453:+@chr1:15855583:15855767:+@chr1:15860732:15860798:+	ENST00000375847	0.59	0.461	0.955	0.508	0.865	0.041	0.018	0.235	0.312	0.026	0.892	0.648	0.062	0.955	26.527	2.343	77	0.118	0.854	0.608	0.237	1	20	0.643	0.357	0.357	0.643	0.643	0.37	0.5	0.452	0	SE
ENSG00000150756	FAM173B	NA	NA	NA	5	-	0.29,0.593,0.786,0.791,0.848,0.614,0.608,0.686,0.833,0.744	0.435,0.939,0.891,0.854,0.795,0.766,0.874,1.0,0.865,0.691	-0.132	2.8e-36	8.16e-34	chr5:10236590:10236727:-@chr5:10235323:10235373:-@chr5:10227692:10227759:-	ENST00000280330	0.58	0.19	0.751	0.553	0.652	0.023	0.019	0.026	0.325	0.23	0.421	0.652	0.553	0.751	24	18.162	29.838	0.623	0.717	0.67	0	0	2	0	1	1	0	0	0.67	0	0	0	SE
ENSG00000153310	FAM49B	NA	NA	NA	8	-	0.711,0.833,0.725,0.743,0.853,0.275,0.813,0.668,0.726,0.826	0.695,0.893,0.792,0.85,0.887,1.0,0.941,0.842,0.794,0.804	-0.132	2.43e-07	1.15e-05	chr8:130915558:130915596:-@chr8:130891635:130891717:-@chr8:130883621:130883742:-	ENST00000518283	0.58	0.581	0.945	0.49	0.796	0.141	0.021	0.741	0.446	0.034	0.899	0.413	0.037	0.945	28.759	4.294	68.842	0.193	0.657	0.54	0.297	1	12	0.52	0.48	0.48	0.52	0.52	0.414	0.32	0.099	0	SE
ENSG00000151067	CACNA1C	ENST00000406454	-	ALTERNATIVE:2	12	+	0.913,0.444,0.651,0.583,0.759,NA,0.848,0.863,0.863,0.62	0.88,0.848,0.852,1.0,0.848,NA,1.0,1.0,0.777,1.0	-0.185	4.54e-07	2.07e-05	chr12:2743463:2743546:+@chr12:2757641:2757673:+@chr12:2760806:2760913:+	ENST00000406454	0.58	0.594	0.886	0.639	0.794	0.069	0.032	0.111	0.794	0.639	0.886	0.136	0.055	0.327	41.993	17.407	63.444	0.545	0.613	0.592	0	0	12	0	1	1	0	0	0.592	1	0.045	0	SE
ENSG00000151067	CACNA1C	ENST00000399606	CCDS44789.1	ALTERNATIVE:2	12	+	0.913,0.444,0.651,0.583,0.759,NA,0.848,0.863,0.863,0.62	0.88,0.848,0.852,1.0,0.848,NA,1.0,1.0,0.777,1.0	-0.185	4.54e-07	2.07e-05	chr12:2743463:2743546:+@chr12:2757641:2757673:+@chr12:2760806:2760913:+	ENST00000399606	0.58	0.594	0.876	0.728	0.806	0.102	0.041	0.189	0.806	0.728	0.876	0.093	0.05	0.196	42.9	22.444	62.722	0.515	0.596	0.569	0	0	12	0	1	1	0	0	0.569	1	0.045	0	SE
ENSG00000151067	CACNA1C	ENST00000399637	CCDS44799.1	ALTERNATIVE:2	12	+	0.913,0.444,0.651,0.583,0.759,NA,0.848,0.863,0.863,0.62	0.88,0.848,0.852,1.0,0.848,NA,1.0,1.0,0.777,1.0	-0.185	4.54e-07	2.07e-05	chr12:2743463:2743546:+@chr12:2757641:2757673:+@chr12:2760806:2760913:+	ENST00000399637	0.58	0.594	0.878	0.725	0.81	0.128	0.046	0.217	0.81	0.725	0.878	0.063	0.046	0.104	42.885	21.111	62.389	0.514	0.59	0.569	0	0	12	0	1	1	0	0	0.569	1	0.045	0	SE
ENSG00000124333	VAMP7	NA	NA	NA	X	+	0.955,0.975,0.917,0.971,0.942,1.0,0.96,0.968,0.96,0.966	0.951,0.977,0.877,0.918,1.0,0.0,1.0,0.939,0.918,1.0	0.103	8.19e-07	3.57e-05	chrX:155130161:155130251:+@chrX:155149477:155149544:+@chrX:155169365:155169457:+	ENST00000460621	0.58	0.222	0.951	0.598	0.829	0.019	0.016	0.022	0.176	0.032	0.642	0.805	0.342	0.951	28.554	2.645	61.467	0.172	0.259	0	0.203	0	0	1	0	0	1	1	0.203	1	0.276	0	SE
ENSG00000105483	CARD8	ENST00000391898	CCDS54289.1	ALTERNATIVE:2	19	-	0.525,0.852,0.784,0.652,0.786,1.0,0.676,0.702,0.698,0.895	0.625,0.667,0.926,0.778,1.0,1.0,0.833,0.946,1.0,0.818	-0.102	3.37e-06	0.000131	chr19:48724987:48725112:-@chr19:48722128:48722269:-@chr19:48718597:48718641:-	ENST00000391898	0.58	0.031	0.921	0.486	0.781	0.456	0.039	0.921	0.501	0.056	0.919	0.044	0.021	0.104	29.722	2.765	66.85	0.129	0.263	0	0.175	0	0	1	0	0	1	1	0.175	1	0.19	0	SE
ENSG00000105483	CARD8	ENST00000519940	CCDS54289.1	ALTERNATIVE:2	19	-	0.525,0.852,0.784,0.652,0.786,1.0,0.676,0.702,0.698,0.895	0.625,0.667,0.926,0.778,1.0,1.0,0.833,0.946,1.0,0.818	-0.102	3.37e-06	0.000131	chr19:48724987:48725112:-@chr19:48722128:48722269:-@chr19:48718597:48718641:-	ENST00000519940	0.58	0.031	0.921	0.486	0.781	0.456	0.039	0.921	0.501	0.056	0.919	0.044	0.021	0.104	29.722	2.765	66.85	0.129	0.263	0	0.175	0	0	1	0	0	1	1	0.175	1	0.19	0	SE
ENSG00000100416	TRMU	ENST00000290846	CCDS14075.1	PRINCIPAL:1	22	+	0.652,0.647,0.672,0.492,0.447,0.49,0.615,0.594,0.444,0.707	0.933,0.505,0.837,0.8,0.732,NA,0.741,0.784,0.714,0.608	-0.163	2.68e-05	0.00081	chr22:46733676:46733841:+@chr22:46739159:46739265:+@chr22:46742319:46742441:+	ENST00000290846	0.58	0.368	0.949	0.524	0.848	0.027	0.018	0.064	0.321	0.033	0.91	0.652	0.047	0.949	22.888	0.696	60.85	0.081	0.108	0	0.092	0	0	1	0	0	1	1	0.092	1	0.095	0	SE
ENSG00000105397	TYK2	NA	NA	NA	19	-	0.118,0.041,0.102,0.125,0.0,1.0,0.017,0.0,0.08,0.0	0.017,0.0,0.013,0.0,0.0,NA,0.091,0.014,0.0,0.015	0.132	0.000156	0.0035	chr19:10488890:10489102:-@chr19:10480433:10480553:-@chr19:10479005:10479094:-	ENST00000530829	0.58	-0.102	0.902	0.481	0.721	0.139	0.034	0.657	0.667	0.139	0.902	0.194	0.054	0.825	27.423	8.706	58.667	0.112	0.316	0	0.157	0	0	1	0	0	1	1	0.157	0	0	0	SE
ENSG00000206562	METTL6	NA	NA	NA	3	-	0.471,0.385,0.6,0.417,0.5,0.143,0.333,0.75,0.667,0.529	0.22,0.52,0.6,0.111,0.5,NA,0.333,0.111,0.167,0.375	0.153	0.00024	0.00518	chr3:15457279:15457449:-@chr3:15457005:15457090:-@chr3:15455528:15455669:-	ENST00000383789	0.58	0	0.95	0.491	0.815	0.193	0.019	0.873	0.513	0.03	0.927	0.294	0.02	0.95	20.009	1.2	43.586	0.082	0.093	0	0.087	0	0	1	0	0	1	1	0.087	0.033	0.011	0	SE
ENSG00000171466	ZNF562	NA	NA	NA	19	-	0.762,0.8,0.875,1.0,0.833,1.0,0.368,0.65,0.946,0.8	0.792,0.733,0.467,0.6,0.429,NA,0.789,1.0,0.5,0.6	0.147	0.000554	0.0109	chr19:9768685:9768811:-@chr19:9767223:9767329:-@chr19:9762955:9764557:-	ENST00000453792	0.58	-0.091	0.902	0.468	0.699	0.092	0.027	0.287	0.614	0.178	0.902	0.294	0.047	0.795	29.502	7.882	63.111	0.134	0.243	0	0.169	0	0	1	0	0	1	1	0.169	0	0	0	SE
ENSG00000109466	KLHL2	ENST00000226725	CCDS34094.1	PRINCIPAL:3	4	+	0.98,0.87,0.805,0.905,0.745,1.0,0.63,0.798,0.642,0.921	0.967,0.941,1.0,0.917,1.0,NA,0.968,1.0,1.0,0.906	-0.137	8.02e-21	1.22e-18	chr4:166141086:166141211:+@chr4:166149959:166150065:+@chr4:166159930:166160051:+	ENST00000226725	0.57	0.306	0.937	0.499	0.822	0.319	0.02	0.929	0.29	0.042	0.922	0.391	0.02	0.937	19.008	2.667	67.474	0.091	0.116	0	0.101	0	0	1	0	0	1	1	0.101	1	0.336	0	SE
ENSG00000187630	DHRS4L2	NA	NA	NA	14	+	1.0,1.0,1.0,0.941,0.941,1.0,1.0,1.0,1.0,1.0	0.818,0.934,0.661,0.934,0.844,0.536,0.695,0.853,0.905,0.84	0.186	6.52e-19	9.25e-17	chr14:24459391:24459568:+@chr14:24464241:24464342:+@chr14:24473546:24473601:+	ENST00000397071	0.57	0.173	0.95	0.515	0.86	0.147	0.018	0.908	0.478	0.03	0.912	0.376	0.024	0.95	20.216	1.043	72.45	0.087	0.171	0	0.115	0	0	1	0	0	1	1	0.115	1	0.333	0	SE
ENSG00000105755	ETHE1	NA	NA	NA	19	-	0.942,0.925,0.972,0.946,0.979,1.0,0.977,0.946,0.978,0.939	0.968,0.854,0.965,0.912,0.906,0.03,0.918,0.924,0.875,0.957	0.13	1e-11	8.05e-10	chr19:44031249:44031357:-@chr19:44030667:44030811:-@chr19:44015589:44015718:-	ENST00000594342	0.57	0.277	0.95	0.49	0.825	0.292	0.019	0.921	0.399	0.029	0.917	0.309	0.019	0.95	18.63	0.87	64.263	0.076	0.171	0	0.095	0	0	1	0	0	1	1	0.095	0	0	0	SE
ENSG00000105755	ETHE1	NA	NA	NA	19	-	0.942,0.925,0.972,0.946,0.979,1.0,0.977,0.946,0.978,0.939	0.968,0.854,0.965,0.912,0.906,0.03,0.918,0.924,0.875,0.957	0.13	1e-11	8.05e-10	chr19:44031249:44031357:-@chr19:44030667:44030811:-@chr19:44015589:44015718:-	ENST00000598330	0.57	0.277	0.95	0.49	0.825	0.292	0.019	0.921	0.399	0.029	0.917	0.309	0.019	0.95	18.63	0.87	64.263	0.076	0.171	0	0.095	0	0	1	0	0	1	1	0.095	0	0	0	SE
ENSG00000122417	ODF2L	NA	NA	NA	1	-	0.25,0.756,0.667,0.439,0.846,0.551,0.959,0.938,0.785,0.782	0.385,0.824,0.434,0.217,0.25,NA,0.842,0.744,0.867,0.771	0.105	1.62e-09	1.02e-07	chr1:86824470:86824574:-@chr1:86822127:86822285:-@chr1:86820457:86820542:-	ENST00000394731	0.57	0.303	0.953	0.747	0.926	0.019	0.017	0.025	0.055	0.029	0.23	0.926	0.747	0.953	30.122	3.294	60.174	0.152	0.523	0.517	0.246	1	6	0.889	0.111	0.111	0.889	0.889	0.276	0	0	0	SE
ENSG00000122417	ODF2L	NA	NA	NA	1	-	0.25,0.756,0.667,0.439,0.846,0.551,0.959,0.938,0.785,0.782	0.385,0.824,0.434,0.217,0.25,NA,0.842,0.744,0.867,0.771	0.105	1.62e-09	1.02e-07	chr1:86824470:86824574:-@chr1:86822127:86822285:-@chr1:86820457:86820542:-	ENST00000370567	0.57	0.303	0.953	0.702	0.918	0.019	0.017	0.025	0.063	0.029	0.276	0.918	0.702	0.953	30.033	4	60.522	0.144	0.523	0.517	0.245	1	6	0.889	0.111	0.111	0.889	0.889	0.275	0	0	0	SE
ENSG00000153310	FAM49B	NA	NA	NA	8	-	0.711,0.833,0.725,0.743,0.853,0.275,0.813,0.668,0.726,0.826	0.695,0.893,0.792,0.85,0.887,1.0,0.941,0.842,0.794,0.804	-0.132	2.43e-07	1.15e-05	chr8:130915558:130915596:-@chr8:130891635:130891717:-@chr8:130883621:130883742:-	ENST00000519142	0.57	0.581	0.945	0.53	0.788	0.125	0.021	0.706	0.453	0.034	0.902	0.422	0.045	0.945	28.896	5.619	71.474	0.202	0.674	0.543	0.284	1	14	0.44	0.56	0.56	0.44	0.44	0.429	0.32	0.061	0	SE
ENSG00000153310	FAM49B	NA	NA	NA	8	-	0.711,0.833,0.725,0.743,0.853,0.275,0.813,0.668,0.726,0.826	0.695,0.893,0.792,0.85,0.887,1.0,0.941,0.842,0.794,0.804	-0.132	2.43e-07	1.15e-05	chr8:130915558:130915596:-@chr8:130891635:130891717:-@chr8:130883621:130883742:-	ENST00000519020	0.57	0.581	0.945	0.553	0.813	0.084	0.021	0.382	0.509	0.033	0.902	0.407	0.048	0.945	30.64	3.941	71.889	0.291	0.662	0.532	0.347	1	16	0.36	0.64	0.64	0.36	0.36	0.466	0.32	0.157	0	SE
ENSG00000151067	CACNA1C	ENST00000399655	CCDS44794.1	ALTERNATIVE:2	12	+	0.913,0.444,0.651,0.583,0.759,NA,0.848,0.863,0.863,0.62	0.88,0.848,0.852,1.0,0.848,NA,1.0,1.0,0.777,1.0	-0.185	4.54e-07	2.07e-05	chr12:2743463:2743546:+@chr12:2757641:2757673:+@chr12:2760806:2760913:+	ENST00000399655	0.57	0.594	0.875	0.737	0.816	0.089	0.041	0.157	0.816	0.737	0.875	0.095	0.052	0.197	43.816	21.259	64.333	0.518	0.612	0.581	0	0	12	0	1	1	0	0	0.581	1	0.045	0	SE
ENSG00000151067	CACNA1C	ENST00000399603	CCDS53734.1	ALTERNATIVE:2	12	+	0.913,0.444,0.651,0.583,0.759,NA,0.848,0.863,0.863,0.62	0.88,0.848,0.852,1.0,0.848,NA,1.0,1.0,0.777,1.0	-0.185	4.54e-07	2.07e-05	chr12:2743463:2743546:+@chr12:2757641:2757673:+@chr12:2760806:2760913:+	ENST00000399603	0.57	0.594	0.87	0.801	0.839	0.08	0.029	0.114	0.839	0.801	0.87	0.081	0.052	0.13	43.615	19.704	65.389	0.549	0.647	0.614	0	0	12	0	1	1	0	0	0.614	1	0.045	0	SE
ENSG00000151067	CACNA1C	ENST00000399621	CCDS44793.1	ALTERNATIVE:2	12	+	0.913,0.444,0.651,0.583,0.759,NA,0.848,0.863,0.863,0.62	0.88,0.848,0.852,1.0,0.848,NA,1.0,1.0,0.777,1.0	-0.185	4.54e-07	2.07e-05	chr12:2743463:2743546:+@chr12:2757641:2757673:+@chr12:2760806:2760913:+	ENST00000399621	0.57	0.594	0.876	0.723	0.81	0.095	0.043	0.16	0.81	0.723	0.876	0.095	0.05	0.208	43.379	21.407	67.444	0.518	0.605	0.576	0	0	12	0	1	1	0	0	0.576	1	0.045	0	SE
ENSG00000154175	ABI3BP	ENST00000284322	CCDS46880.1	PRINCIPAL:2	3	-	0.796,0.662,0.56,0.544,0.809,1.0,0.567,0.774,0.677,0.585	0.65,0.803,1.0,1.0,0.769,NA,0.605,1.0,1.0,0.899	-0.161	6.25e-07	2.79e-05	chr3:100523636:100523710:-@chr3:100515253:100515312:-@chr3:100513767:100513847:-	ENST00000284322	0.57	0.319	0.889	0.772	0.85	0.086	0.049	0.151	0.85	0.772	0.889	0.064	0.055	0.084	35.07	11.652	54.1	0.644	0.726	0.699	0	0	21	0	1	1	0	0	0.699	0	0	0	SE
ENSG00000124333	VAMP7	ENST00000286448	CCDS14770.4	PRINCIPAL:1	X	+	0.955,0.975,0.917,0.971,0.942,1.0,0.96,0.968,0.96,0.966	0.951,0.977,0.877,0.918,1.0,0.0,1.0,0.939,0.918,1.0	0.103	8.19e-07	3.57e-05	chrX:155130161:155130251:+@chrX:155149477:155149544:+@chrX:155169365:155169457:+	ENST00000286448	0.57	0.222	0.952	0.598	0.874	0.019	0.016	0.022	0.118	0.031	0.615	0.864	0.369	0.952	27.712	2.968	58.933	0.143	0.188	0	0.161	0	0	1	0	0	1	1	0.161	1	0.276	0	SE
ENSG00000162241	SLC25A45	NA	NA	NA	11	-	0.933,0.926,0.68,0.684,0.92,0.125,0.917,0.826,1.0,0.854	1.0,0.733,0.833,0.867,0.789,1.0,1.0,1.0,1.0,0.862	-0.122	0.000143	0.00322	chr11:65147338:65147409:-@chr11:65146847:65147032:-@chr11:65144289:65144547:-	ENST00000417511	0.57	0.276	0.953	0.497	0.847	0.022	0.016	0.049	0.209	0.028	0.908	0.768	0.057	0.953	18.071	2.143	62.356	0.117	0.476	0	0.193	1	0	1	0	0	1	1	0.193	0.286	0.191	0	SE
ENSG00000149294	NCAM1	NA	NA	NA	11	+	0.309,0.243,0.193,0.299,0.331,0.659,0.452,0.256,0.231,0.352	0.33,0.453,0.271,0.452,0.692,1.0,0.434,0.336,0.59,0.391	-0.162	0.000832	0.0156	chr11:113085091:113085233:+@chr11:113092018:113092047:+@chr11:113102367:113102517:+	ENST00000401611	0.57	0.6	0.843	0.479	0.739	0.081	0.056	0.143	0.723	0.395	0.843	0.197	0.073	0.55	44.314	22.98	64.4	0.551	0.583	0.564	0	0	11	0	1	1	0	0	0.564	1	0.105	0	SE
ENSG00000187630	DHRS4L2	NA	NA	NA	14	+	1.0,1.0,1.0,0.941,0.941,1.0,1.0,1.0,1.0,1.0	0.818,0.934,0.661,0.934,0.844,0.536,0.695,0.853,0.905,0.84	0.186	6.52e-19	9.25e-17	chr14:24459391:24459568:+@chr14:24464241:24464342:+@chr14:24473546:24473601:+	ENST00000545240	0.56	0.173	0.95	0.574	0.866	0.148	0.018	0.908	0.486	0.03	0.909	0.366	0.024	0.95	21.052	1.043	74.85	0.088	0.174	0	0.118	0	0	1	0	0	1	1	0.118	1	0.333	0	SE
ENSG00000163607	GTPBP8	NA	NA	NA	3	+	0.652,0.6,0.852,0.923,0.529,0.63,0.586,0.647,0.667,0.586	0.727,1.0,1.0,1.0,0.882,NA,0.926,0.862,0.818,0.765	-0.219	2.74e-15	2.97e-13	chr3:112709832:112710182:+@chr3:112713982:112714112:+@chr3:112715739:112715838:+	ENST00000473129	0.56	0.416	0.95	0.498	0.831	0.173	0.018	0.914	0.454	0.031	0.912	0.373	0.02	0.95	23.006	1.613	62.421	0.089	0.636	0.551	0.141	1	4	0.897	0.103	0.103	0.897	0.897	0.183	0.872	0.291	0	SE
ENSG00000198208	RPS6KL1	NA	NA	NA	14	-	0.593,0.76,1.0,0.733,0.529,1.0,0.851,0.895,0.875,0.862	0.652,1.0,0.947,0.939,1.0,NA,0.882,0.962,0.951,0.913	-0.106	5.63e-08	2.88e-06	chr14:75375553:75375635:-@chr14:75374138:75374233:-@chr14:75373721:75373827:-	ENST00000553789	0.56	0.227	0.948	0.503	0.809	0.085	0.018	0.318	0.512	0.032	0.867	0.404	0.047	0.948	23.535	1.826	55.689	0.113	0.194	0	0.15	0	0	1	0	0	1	1	0.15	1	0.28	0	SE
ENSG00000151067	CACNA1C	ENST00000335762	-	ALTERNATIVE:2	12	+	0.913,0.444,0.651,0.583,0.759,NA,0.848,0.863,0.863,0.62	0.88,0.848,0.852,1.0,0.848,NA,1.0,1.0,0.777,1.0	-0.185	4.54e-07	2.07e-05	chr12:2743463:2743546:+@chr12:2757641:2757673:+@chr12:2760806:2760913:+	ENST00000335762	0.56	0.594	0.882	0.677	0.811	0.12	0.047	0.219	0.811	0.677	0.882	0.07	0.05	0.121	41.569	20.37	62.278	0.512	0.584	0.613	0	1	11	0.083	0.917	0.917	0.083	0.083	0.562	1	0.045	0	SE
ENSG00000188321	ZNF559	NA	NA	NA	19	+	0.725,0.667,0.875,0.1,1.0,NA,1.0,0.833,0.467,0.76	1.0,0.538,0.704,1.0,1.0,NA,1.0,1.0,1.0,0.688	-0.167	4.21e-06	0.00016	chr19:9435371:9435456:+@chr19:9448472:9448693:+@chr19:9449170:9449258:+	ENST00000585377	0.56	0.146	0.897	0.47	0.645	0.263	0.043	0.471	0.643	0.457	0.897	0.094	0.049	0.236	24.808	8.765	48.486	0.461	0.765	0.589	0.461	1	8	0.111	0.889	0.889	0.111	0.111	0.575	0	0	0	SE
ENSG00000136270	TBRG4	NA	NA	NA	7	-	0.543,0.616,0.774,0.776,0.742,0.397,0.686,0.766,0.664,0.81	0.589,0.782,0.817,0.805,0.83,1.0,0.702,0.705,0.818,0.812	-0.109	1.49e-05	0.000497	chr7:45145040:45145363:-@chr7:45144137:45144308:-@chr7:45142630:45143042:-	ENST00000478532	0.56	0.309	0.951	0.69	0.908	0.023	0.017	0.066	0.204	0.028	0.897	0.773	0.081	0.951	20.784	1.314	60.348	0.092	0.167	0	0.116	0	0	1	0	0	1	1	0.116	0	0	0	SE
ENSG00000143450	OAZ3	ENST00000453029	CCDS76216.1	ALTERNATIVE:2	1	+	0.9,0.5,0.692,0.333,0.778,0.188,0.778,0.692,0.8,0.75	0.786,0.529,0.765,0.905,0.75,1.0,0.707,0.882,1.0,0.941	-0.185	5.25e-05	0.00141	chr1:151739701:151739775:+@chr1:151740534:151740709:+@chr1:151742648:151742733:+	ENST00000453029	0.56	0.335	0.927	0.503	0.811	0.433	0.028	0.927	0.483	0.049	0.924	0.083	0.019	0.731	29.397	1.905	82.435	0.089	0.568	0.557	0.189	3	6.5	0.383	0.133	0.083	0.75	0.017	0.266	0.333	0.244	0	SE
ENSG00000130158	DOCK6	NA	NA	NA	19	-	1.0,0.871,0.765,0.286,0.143,NA,0.742,0.882,0.742,0.447	0.909,0.864,0.826,1.0,0.529,1.0,0.833,1.0,1.0,0.929	-0.236	0.000107	0.00247	chr19:11343879:11344042:-@chr19:11342861:11342965:-@chr19:11339616:11339711:-	ENST00000319867	0.56	0.328	0.899	0.488	0.77	0.143	0.032	0.537	0.72	0.246	0.899	0.136	0.039	0.716	30.868	10.435	63.2	0.218	0.524	0.548	0.282	2	17	0.25	0.472	0.472	0.389	0.111	0.4	0	0	0	SE
ENSG00000130158	DOCK6	NA	NA	NA	19	-	0.429,0.385,0.333,0.6,0.2,NA,0.357,0.2,0.733,0.313	0.733,0.8,0.524,0.571,0.778,NA,0.625,0.6,0.167,0.481	-0.192	0.000229	0.00497	chr19:11343879:11344042:-@chr19:11342861:11342965:-@chr19:11339974:11340066:-	ENST00000319867	0.56	0.328	0.899	0.488	0.77	0.143	0.032	0.537	0.72	0.246	0.899	0.136	0.039	0.716	30.868	10.435	63.2	0.218	0.524	0.548	0.282	2	17	0.25	0.472	0.472	0.389	0.111	0.4	0	0	0	SE
ENSG00000187630	DHRS4L2	ENST00000382755	-	ALTERNATIVE:2	14	+	1.0,1.0,1.0,0.941,0.941,1.0,1.0,1.0,1.0,1.0	0.818,0.934,0.661,0.934,0.844,0.536,0.695,0.853,0.905,0.84	0.186	6.52e-19	9.25e-17	chr14:24459391:24459568:+@chr14:24464241:24464342:+@chr14:24473546:24473601:+	ENST00000382755	0.55	0.173	0.95	0.611	0.861	0.145	0.018	0.887	0.482	0.03	0.911	0.373	0.022	0.95	21.654	1.097	75.95	0.088	0.17	0	0.113	0	0	1	0	0	1	1	0.113	1	0.196	0	SE
ENSG00000122643	NT5C3A	NA	NA	NA	7	-	0.564,0.686,0.673,0.813,0.568,0.723,0.681,0.721,0.657,0.766	0.385,0.341,0.564,0.54,0.649,0.0,0.569,0.541,0.492,0.539	0.223	4.57e-14	4.43e-12	chr7:33102180:33102408:-@chr7:33075546:33075600:-@chr7:33066429:33066527:-	ENST00000449201	0.55	0.432	0.952	0.542	0.839	0.22	0.019	0.878	0.405	0.03	0.909	0.375	0.019	0.952	27.303	0.968	74.357	0.112	0.819	0.663	0.198	2	5.5	0.366	0.244	0.024	0.707	0.024	0.323	0	0	0	SE
ENSG00000184459	BPIFC	ENST00000300399	CCDS13906.1	PRINCIPAL:1	22	-	1.0,1.0,1.0,0.875,0.913,NA,1.0,1.0,1.0,1.0	0.852,1.0,1.0,0.897,0.914,NA,1.0,0.778,1.0,0.3	0.116	1.13e-07	5.54e-06	chr22:32843199:32843327:-@chr22:32841828:32841983:-@chr22:32841622:32841685:-	ENST00000300399	0.55	0.272	0.928	0.493	0.824	0.545	0.028	0.928	0.392	0.05	0.914	0.063	0.018	0.878	23.869	2.4	65.067	0.089	0.171	0	0.107	0	0	1	0	0	1	1	0.107	1	0.31	0	SE
ENSG00000184459	BPIFC	ENST00000397452	CCDS13906.1	PRINCIPAL:1	22	-	1.0,1.0,1.0,0.875,0.913,NA,1.0,1.0,1.0,1.0	0.852,1.0,1.0,0.897,0.914,NA,1.0,0.778,1.0,0.3	0.116	1.13e-07	5.54e-06	chr22:32843199:32843327:-@chr22:32841828:32841983:-@chr22:32841622:32841685:-	ENST00000397452	0.55	0.272	0.928	0.493	0.824	0.545	0.028	0.928	0.392	0.05	0.914	0.063	0.018	0.878	23.869	2.4	65.067	0.089	0.171	0	0.107	0	0	1	0	0	1	1	0.107	1	0.31	0	SE
ENSG00000137814	HAUS2	NA	NA	NA	15	+	0.549,0.152,0.385,0.421,0.467,0.571,0.282,0.234,0.25,0.351	0.452,0.5,0.615,0.438,0.548,0.682,0.364,0.778,0.778,0.395	-0.189	0.000187	0.00413	chr15:42851537:42851606:+@chr15:42852980:42853068:+@chr15:42853468:42853600:+	ENST00000564279	0.55	0.022	0.953	0.634	0.9	0.02	0.018	0.024	0.115	0.028	0.837	0.865	0.142	0.953	24.618	4	53.3	0.105	0.285	0	0.133	0	0	1	0	0	1	1	0.133	0.323	0.115	0	SE
ENSG00000123146	CD97	NA	NA	NA	19	+	0.569,0.41,0.583,0.395,0.469,1.0,0.42,0.514,0.42,0.4	0.524,0.319,0.111,0.179,0.333,NA,0.2,0.135,0.818,0.381	0.185	0.000694	0.0133	chr19:14501736:14501891:+@chr19:14507154:14507285:+@chr19:14508470:14508616:+	ENST00000357355	0.55	0.012	0.912	0.485	0.749	0.218	0.034	0.762	0.694	0.211	0.912	0.089	0.025	0.397	34.729	6.815	71.474	0.101	0.464	0	0.251	1	0	1	0	0	1	1	0.251	0.956	1	0	SE
ENSG00000111907	TPD52L1	ENST00000304877	-	ALTERNATIVE:2	6	+	0.132,0.117,0.331,0.262,0.292,0.498,0.248,0.296,0.248,0.498	0.159,0.333,0.335,0.267,0.271,0.964,0.148,0.398,0.615,0.438	-0.101	0.00107	0.0195	chr6:125569428:125569529:+@chr6:125574863:125574901:+@chr6:125583980:125584643:+	ENST00000304877	0.55	0.566	0.87	0.488	0.701	0.284	0.069	0.649	0.658	0.316	0.87	0.059	0.035	0.105	29.24	12.857	48.348	0.504	0.537	0.516	0	0	14	0	1	1	0	0	0.516	1	0.077	0	SE
ENSG00000010803	SCMH1	NA	NA	NA	1	-	0.2,0.5,0.586,0.36,0.0,0.0,1.0,0.5,0.25,0.333	0.6,0.667,0.435,0.3,0.467,1.0,0.615,0.684,0.333,0.36	-0.173	0.00168	0.0291	chr1:41625397:41625605:-@chr1:41618271:41618413:-@chr1:41608550:41608784:-	ENST00000397174	0.55	0.551	0.896	0.839	0.868	0.058	0.034	0.091	0.868	0.839	0.896	0.074	0.067	0.087	31.47	20.522	38.533	0.618	0.835	0.729	0	0	6	0	1	1	0	0	0.729	0	0	0	SE
ENSG00000198208	RPS6KL1	ENST00000555647	CCDS9834.2	PRINCIPAL:1	14	-	0.467,0.6,0.75,1.0,0.7,1.0,0.909,0.833,0.684,0.676	0.368,0.714,0.714,1.0,0.462,NA,0.533,0.622,0.444,0.55	0.161	0.00193	0.0329	chr14:75386548:75386672:-@chr14:75385216:75385308:-@chr14:75378497:75378544:-	ENST00000555647	0.55	0.31	0.931	0.471	0.746	0.124	0.021	0.647	0.562	0.043	0.886	0.314	0.049	0.931	31.014	8.176	67.333	0.133	0.658	0.564	0.212	1	13	0.594	0.406	0.406	0.594	0.594	0.355	0	0	0	SE
ENSG00000198208	RPS6KL1	ENST00000358328	CCDS9834.2	PRINCIPAL:1	14	-	0.467,0.6,0.75,1.0,0.7,1.0,0.909,0.833,0.684,0.676	0.368,0.714,0.714,1.0,0.462,NA,0.533,0.622,0.444,0.55	0.161	0.00193	0.0329	chr14:75386548:75386672:-@chr14:75385216:75385308:-@chr14:75378497:75378544:-	ENST00000358328	0.55	0.31	0.931	0.471	0.746	0.124	0.021	0.647	0.562	0.043	0.886	0.314	0.049	0.931	31.014	8.176	67.333	0.133	0.658	0.564	0.212	1	13	0.594	0.406	0.406	0.594	0.594	0.355	0	0	0	SE
ENSG00000198208	RPS6KL1	ENST00000557413	CCDS9834.2	PRINCIPAL:1	14	-	0.467,0.6,0.75,1.0,0.7,1.0,0.909,0.833,0.684,0.676	0.368,0.714,0.714,1.0,0.462,NA,0.533,0.622,0.444,0.55	0.161	0.00193	0.0329	chr14:75386548:75386672:-@chr14:75385216:75385308:-@chr14:75378497:75378544:-	ENST00000557413	0.55	0.31	0.931	0.471	0.746	0.124	0.021	0.647	0.562	0.043	0.886	0.314	0.049	0.931	31.014	8.176	67.333	0.133	0.658	0.564	0.212	1	13	0.594	0.406	0.406	0.594	0.594	0.355	0	0	0	SE
ENSG00000267618	RAD51L3-RFFL	ENST00000394589	CCDS11287.1	PRINCIPAL:1	17	-	0.583,0.455,0.458,0.375,0.484,0.714,0.579,0.353,0.548,0.571	0.583,0.105,0.39,0.5,0.313,0.059,0.298,0.459,0.348,0.433	0.163	0.00219	0.0367	chr17:33446130:33446191:-@chr17:33434007:33434141:-@chr17:33433405:33433500:-	ENST00000394589	0.55	0.251	0.949	0.593	0.886	0.142	0.018	0.916	0.305	0.03	0.927	0.553	0.021	0.949	21.863	1.13	62.632	0.095	0.189	0	0.126	0	0	1	0	0	1	1	0.126	1	0.251	0	SE
ENSG00000267618	RAD51L3-RFFL	ENST00000345365	CCDS11287.1	PRINCIPAL:1	17	-	0.583,0.455,0.458,0.375,0.484,0.714,0.579,0.353,0.548,0.571	0.583,0.105,0.39,0.5,0.313,0.059,0.298,0.459,0.348,0.433	0.163	0.00219	0.0367	chr17:33446130:33446191:-@chr17:33434007:33434141:-@chr17:33433405:33433500:-	ENST00000345365	0.55	0.251	0.949	0.593	0.886	0.142	0.018	0.916	0.305	0.03	0.927	0.553	0.021	0.949	21.863	1.13	62.632	0.095	0.189	0	0.126	0	0	1	0	0	1	1	0.126	1	0.251	0	SE
ENSG00000053918	KCNQ1	ENST00000155840	CCDS7736.1	PRINCIPAL:2	11	+	1.0,0.905,0.873,0.923,0.913,1.0,0.938,1.0,0.885,0.917	0.565,0.892,0.95,0.846,0.913,0.538,0.943,0.721,0.922,0.807	0.126	1.42e-24	2.61e-22	chr11:2604665:2604775:+@chr11:2606442:2606537:+@chr11:2608800:2608922:+	ENST00000155840	0.54	0.277	0.951	0.561	0.862	0.021	0.017	0.03	0.186	0.029	0.861	0.793	0.117	0.951	25.53	2.857	58.311	0.108	0.231	0	0.162	0	0	1	0	0	1	1	0.162	0.364	0.052	0	SE
ENSG00000187630	DHRS4L2	ENST00000335125	CCDS9606.2	PRINCIPAL:2	14	+	1.0,1.0,1.0,0.941,0.941,1.0,1.0,1.0,1.0,1.0	0.818,0.934,0.661,0.934,0.844,0.536,0.695,0.853,0.905,0.84	0.186	6.52e-19	9.25e-17	chr14:24459391:24459568:+@chr14:24464241:24464342:+@chr14:24473546:24473601:+	ENST00000335125	0.54	0.173	0.95	0.638	0.871	0.145	0.018	0.899	0.49	0.03	0.91	0.365	0.021	0.95	21.356	1.13	77.6	0.087	0.177	0	0.114	0	0	1	0	0	1	1	0.114	1	0.196	0	SE
ENSG00000187630	DHRS4L2	NA	NA	NA	14	+	1.0,1.0,1.0,0.941,0.941,1.0,1.0,1.0,1.0,1.0	0.818,0.934,0.661,0.934,0.844,0.536,0.695,0.853,0.905,0.84	0.186	6.52e-19	9.25e-17	chr14:24459391:24459568:+@chr14:24464241:24464342:+@chr14:24473546:24473601:+	ENST00000559411	0.54	0.173	0.95	0.624	0.872	0.147	0.018	0.901	0.488	0.03	0.911	0.365	0.022	0.95	21.433	1.043	77.6	0.087	0.182	0	0.114	0	0	1	0	0	1	1	0.114	1	0.196	0	SE
ENSG00000011143	MKS1	ENST00000393119	CCDS11603.2	PRINCIPAL:1	17	-	1.0,0.867,1.0,1.0,1.0,1.0,1.0,1.0,1.0,1.0	0.833,0.905,1.0,1.0,1.0,0.105,1.0,0.833,1.0,0.895	0.13	5.39e-10	3.65e-08	chr17:56285255:56285362:-@chr17:56284446:56284579:-@chr17:56283644:56283741:-	ENST00000393119	0.54	0.244	0.947	0.5	0.826	0.304	0.02	0.9	0.456	0.034	0.912	0.241	0.018	0.947	26.605	1.286	73.35	0.09	0.32	0	0.135	0	0	1	0	0	1	1	0.135	1	0.254	0	SE
ENSG00000011143	MKS1	NA	NA	NA	17	-	1.0,0.867,1.0,1.0,1.0,1.0,1.0,1.0,1.0,1.0	0.833,0.905,1.0,1.0,1.0,0.105,1.0,0.833,1.0,0.895	0.13	5.39e-10	3.65e-08	chr17:56285255:56285362:-@chr17:56284446:56284579:-@chr17:56283644:56283741:-	ENST00000537529	0.54	0.244	0.947	0.486	0.819	0.306	0.019	0.903	0.454	0.033	0.916	0.24	0.018	0.947	26.46	1.286	73.5	0.091	0.324	0	0.135	0	0	1	0	0	1	1	0.135	1	0.254	0	SE
ENSG00000119720	NRDE2	NA	NA	NA	14	-	0.0,0.193,0.185,0.087,0.0,1.0,0.093,0.087,0.0,0.0	0.049,0.0,0.0,0.0,0.0,NA,0.082,0.0,0.0,0.061	0.143	0.00011	0.00255	chr14:90769064:90769181:-@chr14:90768118:90768147:-@chr14:90767583:90767716:-	ENST00000554464	0.54	0.029	0.954	0.692	0.899	0.02	0.019	0.021	0.082	0.027	0.289	0.899	0.692	0.954	26.666	2.696	43.895	0.174	0.531	0.518	0.299	1	4	0.636	0.364	0.364	0.636	0.636	0.378	1	0.054	0	SE
ENSG00000204514	ZNF814	NA	NA	NA	19	-	0.837,0.721,0.632,0.862,0.688,0.75,0.667,0.556,0.773,0.783	0.591,0.711,0.571,0.432,0.857,0.261,0.806,0.561,0.889,0.59	0.1	0.000114	0.00264	chr19:58400135:58400175:-@chr19:58388284:58388410:-@chr19:58361688:58361929:-	ENST00000600634	0.54	0.151	0.954	0.567	0.902	0.218	0.018	0.922	0.138	0.028	0.869	0.644	0.02	0.954	14.469	3.952	48.789	0.085	0.432	0	0.116	1	0	1	0	0	1	1	0.116	0.953	1	0	SE
ENSG00000155329	ZCCHC10	ENST00000509437	CCDS75301.1	ALTERNATIVE:2	5	-	0.279,0.605,0.452,0.657,0.615,0.545,0.571,0.458,0.364,0.499	0.45,0.575,0.328,0.627,0.68,1.0,0.638,0.522,0.625,0.676	-0.108	0.000139	0.00316	chr5:132362189:132362237:-@chr5:132358533:132358598:-@chr5:132342451:132342612:-	ENST00000509437	0.54	0.341	0.865	0.482	0.69	0.044	0.026	0.086	0.402	0.1	0.787	0.554	0.172	0.865	33.549	16.381	54.348	0.504	0.536	0.519	0	0	23	0	1	1	0	0	0.519	0	0	0	SE
ENSG00000204514	ZNF814	NA	NA	NA	19	-	1.0,1.0,0.52,0.455,1.0,NA,0.545,0.333,0.684,0.765	0.75,0.889,0.765,0.655,1.0,1.0,1.0,0.846,0.667,0.818	-0.139	0.000227	0.00492	chr19:58400135:58400175:-@chr19:58388284:58388410:-@chr19:58370183:58370351:-	ENST00000600634	0.54	0.151	0.954	0.567	0.902	0.218	0.018	0.922	0.138	0.028	0.869	0.644	0.02	0.954	14.469	3.952	48.789	0.085	0.432	0	0.116	1	0	1	0	0	1	1	0.116	0.953	1	0	SE
ENSG00000123146	CD97	ENST00000242786	CCDS32929.1	PRINCIPAL:1	19	+	0.569,0.41,0.583,0.395,0.469,1.0,0.42,0.514,0.42,0.4	0.524,0.319,0.111,0.179,0.333,NA,0.2,0.135,0.818,0.381	0.185	0.000694	0.0133	chr19:14501736:14501891:+@chr19:14507154:14507285:+@chr19:14508470:14508616:+	ENST00000242786	0.54	0.012	0.917	0.497	0.79	0.275	0.036	0.862	0.657	0.108	0.917	0.069	0.023	0.301	34.744	3.733	66.533	0.11	0.515	0.509	0.23	1	11	0.756	0.244	0.244	0.756	0.756	0.298	0.956	1	0	SE
ENSG00000116138	DNAJC16	NA	NA	NA	1	+	0.76,1.0,0.524,0.625,0.579,1.0,0.514,0.84,0.667,0.7	0.905,1.0,1.0,0.8,1.0,NA,0.692,0.84,0.429,0.818	-0.111	0.000896	0.0166	chr1:15853308:15853453:+@chr1:15855583:15855767:+@chr1:15860732:15860798:+	ENST00000475133	0.54	0.461	0.955	0.39	0.843	0.038	0.018	0.27	0.28	0.026	0.886	0.682	0.062	0.955	26.514	2.8	76.286	0.115	0.855	0.613	0.266	1	20	0.643	0.357	0.357	0.643	0.643	0.39	0.5	0.452	0	SE
ENSG00000116138	DNAJC16	NA	NA	NA	1	+	0.76,1.0,0.524,0.625,0.579,1.0,0.514,0.84,0.667,0.7	0.905,1.0,1.0,0.8,1.0,NA,0.692,0.84,0.429,0.818	-0.111	0.000896	0.0166	chr1:15853308:15853453:+@chr1:15855583:15855767:+@chr1:15860732:15860798:+	ENST00000375838	0.54	0.461	0.955	0.39	0.843	0.038	0.018	0.27	0.28	0.026	0.886	0.682	0.062	0.955	26.514	2.8	76.286	0.115	0.855	0.613	0.266	1	20	0.643	0.357	0.357	0.643	0.643	0.39	0.5	0.452	0	SE
ENSG00000170634	ACYP2	NA	NA	NA	2	+	0.867,0.333,0.636,0.846,0.818,1.0,0.6,1.0,0.111,0.75	0.692,0.25,0.636,1.0,1.0,NA,0.143,0.0,0.0,0.75	0.199	0.0014	0.0249	chr2:54200850:54200947:+@chr2:54284376:54284497:+@chr2:54362590:54362606:+	ENST00000607452	0.54	0.001	0.925	0.541	0.783	0.326	0.035	0.925	0.58	0.051	0.877	0.094	0.019	0.392	29.279	6.444	64.9	0.108	0.407	0	0.259	0	0	1	0	0	1	1	0.259	0	0	0	SE
ENSG00000069020	MAST4	ENST00000405643	-	ALTERNATIVE:2	5	+	0.0,0.059,0.063,0.053,0.167,0.265,0.059,0.5,0.0,0.091	NA,0.143,0.778,0.75,0.875,1.0,0.1,0.304,0.158,0.7	-0.409	1.15e-81	1.14e-78	chr5:66195779:66195810:+@chr5:66259535:66259615:+@chr5:66282272:66282351:+	ENST00000405643	0.53	0.571	0.902	0.493	0.734	0.209	0.041	0.674	0.695	0.294	0.902	0.095	0.032	0.37	33.12	11.098	71.913	0.515	0.724	0.602	0	0	28	0	1	1	0	0	0.602	0	0	0	SE
ENSG00000198682	PAPSS2	NA	NA	NA	10	+	0.237,0.57,0.578,0.39,0.502,0.771,0.649,0.609,0.57,0.523	0.187,0.558,0.498,0.352,0.459,0.08,0.554,0.478,0.533,0.471	0.123	4.71e-37	1.41e-34	chr10:89475489:89475600:+@chr10:89481513:89481527:+@chr10:89487041:89487246:+	ENST00000456849	0.53	0.119	0.903	0.578	0.842	0.037	0.024	0.05	0.842	0.578	0.903	0.121	0.058	0.398	52.449	25	62.4	0.136	0.286	0	0.229	0	0	1	0	0	1	1	0.229	1	0.038	0	SE
ENSG00000117151	CTBS	ENST00000370630	CCDS698.1	PRINCIPAL:1	1	-	0.847,0.713,0.722,0.867,0.671,0.641,0.604,0.776,0.726,0.667	0.832,0.83,0.71,0.884,0.879,1.0,0.82,0.974,0.951,0.735	-0.138	4.31e-09	2.57e-07	chr1:85036265:85036403:-@chr1:85035614:85035822:-@chr1:85031524:85031695:-	ENST00000370630	0.53	0.388	0.955	0.531	0.883	0.115	0.017	0.911	0.332	0.027	0.922	0.553	0.019	0.955	24.545	1.029	66.356	0.077	0.204	0	0.117	0	0	1	0	0	1	1	0.117	0.873	0.255	0	SE
ENSG00000267106	C19orf82	ENST00000586614	-	ALTERNATIVE:2	19	+	1.0,1.0,1.0,1.0,0.765,1.0,0.75,1.0,0.556,1.0	0.913,1.0,0.538,0.765,0.941,0.0,0.857,1.0,1.0,0.714	0.134	8.39e-08	4.19e-06	chr19:9732181:9732321:+@chr19:9737460:9737536:+@chr19:9738392:9738482:+	ENST00000586614	0.53	-0.002	0.887	0.502	0.736	0.223	0.051	0.77	0.665	0.196	0.887	0.112	0.035	0.403	17.495	4.059	45	0.085	0.111	0	0.097	0	0	1	0	0	1	1	0.097	0	0	0	SE
ENSG00000104231	ZFAND1	NA	NA	NA	8	-	0.42,0.509,0.434,0.469,0.524,0.663,0.554,0.671,0.669,0.648	0.52,0.454,0.373,0.432,0.396,0.068,0.377,0.533,0.454,0.562	0.139	6.05e-07	2.7e-05	chr8:82630417:82630459:-@chr8:82629484:82629523:-@chr8:82627222:82627349:-	ENST00000519464	0.53	0.445	0.905	0.552	0.785	0.036	0.022	0.055	0.708	0.213	0.905	0.256	0.06	0.765	37.45	6.769	79.947	0.145	0.552	0.596	0.231	1	7	0.25	0.5	0.5	0.429	0.071	0.413	0.929	0.351	0	SE
ENSG00000132635	PCED1A	NA	NA	NA	20	-	1.0,0.92,1.0,0.826,1.0,0.407,0.942,1.0,0.909,0.95	1.0,1.0,1.0,1.0,1.0,1.0,1.0,0.964,1.0,1.0	-0.101	1.01e-05	0.00035	chr20:2821512:2821836:-@chr20:2820435:2820579:-@chr20:2819838:2819917:-	ENST00000356872	0.53	0.417	0.952	0.493	0.843	0.251	0.02	0.929	0.331	0.028	0.926	0.418	0.022	0.952	22.55	1.484	57.842	0.085	0.668	0.542	0.146	1	12	0.714	0.286	0.286	0.714	0.714	0.259	0.524	0.595	0	SE
ENSG00000205423	CNEP1R1	NA	NA	NA	16	+	0.315,0.193,0.13,0.258,0.374,0.0,0.13,0.22,0.159,0.107	0.526,0.166,0.332,0.295,0.843,0.0,0.285,0.121,0.285,0.341	-0.131	1.64e-05	0.000539	chr16:50059145:50059251:+@chr16:50059562:50059612:+@chr16:50060307:50060378:+	ENST00000389134	0.53	0.166	0.883	0.461	0.678	0.231	0.025	0.864	0.498	0.085	0.883	0.271	0.039	0.782	30.187	11.935	65.333	0.187	0.663	0.56	0.28	1	6	0.667	0.333	0.333	0.667	0.667	0.374	0.167	0.086	0	SE
ENSG00000143450	OAZ3	ENST00000315067	-	ALTERNATIVE:2	1	+	0.9,0.5,0.692,0.333,0.778,0.188,0.778,0.692,0.8,0.75	0.786,0.529,0.765,0.905,0.75,1.0,0.707,0.882,1.0,0.941	-0.185	5.25e-05	0.00141	chr1:151739701:151739775:+@chr1:151740534:151740709:+@chr1:151742648:151742733:+	ENST00000315067	0.53	0.335	0.925	0.494	0.81	0.431	0.029	0.925	0.488	0.052	0.923	0.081	0.02	0.732	30.031	2.048	79.913	0.09	0.638	0.544	0.189	1	15	0.75	0.25	0.25	0.75	0.75	0.278	0.333	0.244	0	SE
ENSG00000149294	NCAM1	NA	NA	NA	11	+	0.309,0.243,0.193,0.299,0.331,0.659,0.452,0.256,0.231,0.352	0.33,0.453,0.271,0.452,0.692,1.0,0.434,0.336,0.59,0.391	-0.162	0.000832	0.0156	chr11:113085091:113085233:+@chr11:113092018:113092047:+@chr11:113102367:113102517:+	ENST00000316851	0.53	0.6	0.857	0.493	0.756	0.07	0.045	0.162	0.676	0.242	0.857	0.254	0.079	0.713	45.348	25.333	66.7	0.547	0.567	0.559	0	0	11	0	1	1	0	0	0.559	1	0.105	0	SE
ENSG00000111907	TPD52L1	NA	NA	NA	6	+	0.132,0.117,0.331,0.262,0.292,0.498,0.248,0.296,0.248,0.498	0.159,0.333,0.335,0.267,0.271,0.964,0.148,0.398,0.615,0.438	-0.101	0.00107	0.0195	chr6:125569428:125569529:+@chr6:125574863:125574901:+@chr6:125583980:125584643:+	ENST00000528193	0.53	0.566	0.828	0.497	0.662	0.285	0.075	0.584	0.632	0.376	0.828	0.083	0.04	0.165	29.534	12	45.111	0.281	0.508	1.014	0.321	1	1	0.464	0.071	0.071	0.857	0.071	0.37	1	0.093	0	SE
ENSG00000111907	TPD52L1	NA	NA	NA	6	+	0.132,0.117,0.331,0.262,0.292,0.498,0.248,0.296,0.248,0.498	0.159,0.333,0.335,0.267,0.271,0.964,0.148,0.398,0.615,0.438	-0.101	0.00107	0.0195	chr6:125569428:125569529:+@chr6:125574863:125574901:+@chr6:125583980:125584643:+	ENST00000532429	0.53	0.566	0.818	0.478	0.658	0.277	0.075	0.579	0.635	0.377	0.818	0.089	0.043	0.195	29.077	13.314	43.913	0.264	0.505	1.01	0.305	1	1	0.464	0.071	0.071	0.857	0.071	0.355	1	0.089	0	SE
ENSG00000100151	PICK1	ENST00000404072	CCDS13965.1	PRINCIPAL:1	22	+	1.0,1.0,0.983,1.0,0.989,1.0,0.989,1.0,1.0,1.0	1.0,1.0,1.0,1.0,0.964,0.0,0.986,1.0,0.961,1.0	0.105	3.77e-10	2.59e-08	chr22:38461009:38461137:+@chr22:38463711:38463777:+@chr22:38465040:38465129:+	ENST00000404072	0.52	0.416	0.926	0.515	0.76	0.323	0.035	0.901	0.533	0.076	0.926	0.144	0.021	0.814	32.433	7.871	68.4	0.169	0.502	1.003	0.257	2	1	0.457	0.043	0.043	0.652	0.261	0.278	0.261	0.078	0	SE
ENSG00000100151	PICK1	ENST00000356976	CCDS13965.1	PRINCIPAL:1	22	+	1.0,1.0,0.983,1.0,0.989,1.0,0.989,1.0,1.0,1.0	1.0,1.0,1.0,1.0,0.964,0.0,0.986,1.0,0.961,1.0	0.105	3.77e-10	2.59e-08	chr22:38461009:38461137:+@chr22:38463711:38463777:+@chr22:38465040:38465129:+	ENST00000356976	0.52	0.416	0.926	0.515	0.76	0.323	0.035	0.901	0.533	0.076	0.926	0.144	0.021	0.814	32.433	7.871	68.4	0.169	0.502	1.003	0.257	2	1	0.457	0.043	0.043	0.652	0.261	0.278	0.261	0.078	0	SE
ENSG00000137210	TMEM14B	NA	NA	NA	6	+	0.765,0.429,0.833,0.571,0.5,0.0,1.0,0.684,1.0,1.0	0.267,0.44,0.263,0.455,0.333,0.0,0.7,0.143,0.091,0.429	0.366	1.27e-07	6.23e-06	chr6:10747992:10748114:+@chr6:10755375:10755465:+@chr6:10770310:10770437:+	ENST00000467317	0.52	0.188	0.878	0.368	0.618	0.293	0.022	0.711	0.294	0.075	0.693	0.412	0.037	0.878	13.749	5.333	41.733	0.087	0.172	0	0.103	0	0	1	0	0	1	1	0.103	1	0.352	0	SE
ENSG00000197619	ZNF615	ENST00000594083	CCDS59418.1	ALTERNATIVE:2	19	-	0.8,0.7,1.0,0.5,1.0,NA,0.412,0.846,0.818,0.667	1.0,1.0,0.8,0.733,1.0,NA,1.0,1.0,1.0,0.684	-0.164	6.65e-07	2.95e-05	chr19:52511394:52511476:-@chr19:52506950:52507153:-@chr19:52505408:52505534:-	ENST00000594083	0.52	0.231	0.865	0.656	0.801	0.108	0.055	0.275	0.801	0.656	0.865	0.091	0.07	0.109	32.545	21.389	47.667	0.54	0.817	0.686	0	0	6	0	1	1	0	0	0.686	0	0	0	SE
ENSG00000105483	CARD8	ENST00000359009	-	ALTERNATIVE:2	19	-	0.525,0.852,0.784,0.652,0.786,1.0,0.676,0.702,0.698,0.895	0.625,0.667,0.926,0.778,1.0,1.0,0.833,0.946,1.0,0.818	-0.102	3.37e-06	0.000131	chr19:48724987:48725112:-@chr19:48722128:48722269:-@chr19:48718597:48718641:-	ENST00000359009	0.52	0.031	0.925	0.51	0.788	0.475	0.041	0.925	0.486	0.051	0.92	0.039	0.021	0.107	29.759	2.941	66.45	0.121	0.338	0	0.174	0	0	1	0	0	1	1	0.174	1	0.19	0	SE
ENSG00000132635	PCED1A	NA	NA	NA	20	-	1.0,0.92,1.0,0.826,1.0,0.407,0.942,1.0,0.909,0.95	1.0,1.0,1.0,1.0,1.0,1.0,1.0,0.964,1.0,1.0	-0.101	1.01e-05	0.00035	chr20:2821512:2821836:-@chr20:2820435:2820579:-@chr20:2819838:2819917:-	ENST00000448755	0.52	0.417	0.952	0.489	0.845	0.251	0.02	0.93	0.348	0.028	0.926	0.401	0.022	0.952	22.13	1.226	61.579	0.084	0.684	0.554	0.143	1	14	0.667	0.333	0.333	0.667	0.667	0.28	0.524	0.595	0	SE
ENSG00000138002	IFT172	ENST00000260570	CCDS1755.1	PRINCIPAL:1	2	-	0.5,0.582,0.958,0.485,0.727,0.85,0.788,0.917,0.676,0.8	1.0,0.824,0.767,0.667,0.877,1.0,0.73,0.789,0.82,0.929	-0.112	1.29e-05	0.000439	chr2:27668796:27668855:-@chr2:27668612:27668710:-@chr2:27668163:27668316:-	ENST00000260570	0.52	0.38	0.919	0.539	0.813	0.043	0.018	0.116	0.712	0.061	0.902	0.245	0.056	0.919	31.874	4.783	67.867	0.257	0.529	0.545	0.385	2	16	0.25	0.471	0.471	0.412	0.088	0.449	0	0	0	SE
ENSG00000136270	TBRG4	ENST00000258770	CCDS5501.1	PRINCIPAL:1	7	-	0.543,0.616,0.774,0.776,0.742,0.397,0.686,0.766,0.664,0.81	0.589,0.782,0.817,0.805,0.83,1.0,0.702,0.705,0.818,0.812	-0.109	1.49e-05	0.000497	chr7:45145040:45145363:-@chr7:45144137:45144308:-@chr7:45142630:45143042:-	ENST00000258770	0.52	0.309	0.954	0.499	0.892	0.021	0.017	0.038	0.173	0.027	0.895	0.806	0.082	0.954	20.718	1.043	64.696	0.094	0.126	0	0.107	0	0	1	0	0	1	1	0.107	0	0	0	SE
ENSG00000112282	MED23	ENST00000354577	CCDS5146.1	ALTERNATIVE:1	6	-	0.641,0.169,0.075,0.213,0.14,NA,0.234,0.0,0.125,0.213	0.55,0.803,0.494,0.691,0.74,0.0,0.189,0.048,0.0,0.487	-0.199	2.56e-05	0.000779	chr6:131937047:131937142:-@chr6:131936464:131936481:-@chr6:131931186:131931386:-	ENST00000354577	0.52	0.578	0.826	0.653	0.736	0.05	0.031	0.073	0.736	0.653	0.826	0.214	0.112	0.284	41.176	35.314	52.25	0.54	0.559	0.552	0	0	7	0	1	1	0	0	0.552	1	0.005	0	SE
ENSG00000112282	MED23	NA	NA	NA	6	-	0.641,0.169,0.075,0.213,0.14,NA,0.234,0.0,0.125,0.213	0.55,0.803,0.494,0.691,0.74,0.0,0.189,0.048,0.0,0.487	-0.199	2.56e-05	0.000779	chr6:131937047:131937142:-@chr6:131936464:131936481:-@chr6:131931186:131931386:-	ENST00000368058	0.52	0.578	0.849	0.59	0.766	0.052	0.028	0.093	0.766	0.59	0.849	0.182	0.107	0.317	43.717	37.286	53.778	0.532	0.551	0.545	0	0	7	0	1	1	0	0	0.545	1	0.005	0	SE
ENSG00000112282	MED23	NA	NA	NA	6	-	0.641,0.169,0.075,0.213,0.14,NA,0.234,0.0,0.125,0.213	0.55,0.803,0.494,0.691,0.74,0.0,0.189,0.048,0.0,0.487	-0.199	2.56e-05	0.000779	chr6:131937047:131937142:-@chr6:131936464:131936481:-@chr6:131931186:131931386:-	ENST00000368053	0.52	0.578	0.827	0.649	0.754	0.044	0.029	0.06	0.754	0.649	0.827	0.203	0.123	0.291	44.18	35.765	55.875	0.54	0.558	0.552	0	0	7	0	1	1	0	0	0.552	1	0.008	0	SE
ENSG00000155329	ZCCHC10	ENST00000355372	CCDS78060.1	ALTERNATIVE:2	5	-	0.279,0.605,0.452,0.657,0.615,0.545,0.571,0.458,0.364,0.499	0.45,0.575,0.328,0.627,0.68,1.0,0.638,0.522,0.625,0.676	-0.108	0.000139	0.00316	chr5:132362189:132362237:-@chr5:132358533:132358598:-@chr5:132342451:132342612:-	ENST00000355372	0.52	0.341	0.82	0.485	0.636	0.068	0.03	0.201	0.418	0.136	0.82	0.515	0.137	0.809	33.036	16.238	54.783	0.457	0.523	0.543	0.377	1	18	0.109	0.783	0.783	0.174	0.043	0.507	0	0	0	SE
ENSG00000155329	ZCCHC10	ENST00000513541	CCDS75302.1	ALTERNATIVE:2	5	-	0.279,0.605,0.452,0.657,0.615,0.545,0.571,0.458,0.364,0.499	0.45,0.575,0.328,0.627,0.68,1.0,0.638,0.522,0.625,0.676	-0.108	0.000139	0.00316	chr5:132362189:132362237:-@chr5:132358533:132358598:-@chr5:132342451:132342612:-	ENST00000513541	0.52	0.341	0.85	0.35	0.665	0.2	0.053	0.625	0.628	0.285	0.85	0.172	0.064	0.467	33.268	13.381	61.217	0.431	0.528	0.573	0.377	4	5.333	0.087	0.391	0.043	0.174	0.043	0.497	0	0	0	SE
ENSG00000095794	CREM	NA	NA	NA	10	+	0.818,0.661,0.538,0.486,0.618,0.556,0.63,0.613,0.679,0.538	0.639,0.191,0.511,0.63,0.576,NA,0.486,0.556,0.419,0.514	0.111	0.00272	0.0441	chr10:35415876:35416121:+@chr10:35468062:35468204:+@chr10:35495823:35495979:+	ENST00000494479	0.52	0.406	0.914	0.502	0.791	0.379	0.049	0.913	0.583	0.059	0.914	0.038	0.027	0.053	29.501	11.87	52.919	0.157	0.866	0.65	0.302	1	8	0.467	0.533	0.533	0.467	0.467	0.487	0	0	0	SE
ENSG00000196776	CD47	NA	NA	NA	3	-	0.543,0.293,0.42,0.497,0.471,0.489,0.51,0.57,0.319,0.441	0.536,0.451,0.518,0.631,0.616,0.683,0.529,0.719,0.567,0.583	-0.128	1.66e-39	5.5e-37	chr3:107770786:107770817:-@chr3:107769425:107769449:-@chr3:107765926:107766139:-	ENST00000361309	0.51	0.509	0.855	0.541	0.74	0.088	0.027	0.173	0.6	0.155	0.855	0.312	0.083	0.818	31.721	12.839	50.35	0.536	0.72	0.601	0	0	9	0	1	1	0	0	0.601	0	0	0	SE
ENSG00000196776	CD47	NA	NA	NA	3	-	0.086,0.494,0.221,0.546,0.555,0.479,0.632,0.377,0.394,0.516	0.171,0.537,0.386,0.777,0.663,1.0,0.779,1.0,0.844,0.825	-0.268	2.41e-23	4.14e-21	chr3:107776324:107776416:-@chr3:107769425:107769449:-@chr3:107765926:107766139:-	ENST00000361309	0.51	0.509	0.855	0.541	0.74	0.088	0.027	0.173	0.6	0.155	0.855	0.312	0.083	0.818	31.721	12.839	50.35	0.536	0.72	0.601	0	0	9	0	1	1	0	0	0.601	0	0	0	SE
ENSG00000100151	PICK1	NA	NA	NA	22	+	1.0,1.0,0.983,1.0,0.989,1.0,0.989,1.0,1.0,1.0	1.0,1.0,1.0,1.0,0.964,0.0,0.986,1.0,0.961,1.0	0.105	3.77e-10	2.59e-08	chr22:38461009:38461137:+@chr22:38463711:38463777:+@chr22:38465040:38465129:+	ENST00000424694	0.51	0.416	0.922	0.612	0.854	0.383	0.032	0.922	0.532	0.056	0.922	0.084	0.021	0.858	35.41	2.857	67.7	0.112	0.546	0.581	0.159	1	10	0.283	0.435	0.435	0.522	0.043	0.343	0.261	0.078	0	SE
ENSG00000198604	BAZ1A	ENST00000382422	CCDS9651.1	PRINCIPAL:1	14	-	0.52,0.72,0.714,0.938,0.864,0.571,1.0,0.888,0.652,0.862	0.438,0.833,1.0,0.636,0.571,0.0,1.0,0.8,0.143,0.68	0.163	4.09e-10	2.79e-08	chr14:35261981:35262127:-@chr14:35255332:35255427:-@chr14:35254983:35255207:-	ENST00000382422	0.51	0.494	0.951	0.627	0.876	0.022	0.018	0.04	0.198	0.03	0.896	0.78	0.068	0.951	31.599	5.529	72.684	0.099	0.651	0.579	0.227	1	16	0.515	0.485	0.485	0.515	0.515	0.398	0	0	0	SE
ENSG00000198604	BAZ1A	ENST00000360310	CCDS9651.1	PRINCIPAL:1	14	-	0.52,0.72,0.714,0.938,0.864,0.571,1.0,0.888,0.652,0.862	0.438,0.833,1.0,0.636,0.571,0.0,1.0,0.8,0.143,0.68	0.163	4.09e-10	2.79e-08	chr14:35261981:35262127:-@chr14:35255332:35255427:-@chr14:35254983:35255207:-	ENST00000360310	0.51	0.494	0.951	0.627	0.876	0.022	0.018	0.04	0.198	0.03	0.896	0.78	0.068	0.951	31.599	5.529	72.684	0.099	0.651	0.579	0.227	1	16	0.515	0.485	0.485	0.515	0.515	0.398	0	0	0	SE
ENSG00000011143	MKS1	NA	NA	NA	17	-	1.0,0.867,1.0,1.0,1.0,1.0,1.0,1.0,1.0,1.0	0.833,0.905,1.0,1.0,1.0,0.105,1.0,0.833,1.0,0.895	0.13	5.39e-10	3.65e-08	chr17:56285255:56285362:-@chr17:56284446:56284579:-@chr17:56283644:56283741:-	ENST00000546108	0.51	0.244	0.947	0.488	0.824	0.308	0.02	0.899	0.453	0.034	0.914	0.239	0.018	0.947	26.812	1.286	68.05	0.091	0.428	0	0.145	0	0	1	0	0	1	1	0.145	1	0.254	0	SE
ENSG00000198208	RPS6KL1	ENST00000555647	CCDS9834.2	PRINCIPAL:1	14	-	0.593,0.76,1.0,0.733,0.529,1.0,0.851,0.895,0.875,0.862	0.652,1.0,0.947,0.939,1.0,NA,0.882,0.962,0.951,0.913	-0.106	5.63e-08	2.88e-06	chr14:75375553:75375635:-@chr14:75374138:75374233:-@chr14:75373721:75373827:-	ENST00000555647	0.51	0.227	0.948	0.472	0.818	0.078	0.018	0.463	0.509	0.033	0.882	0.413	0.048	0.948	21.322	1.13	56.756	0.096	0.117	0	0.108	0	0	1	0	0	1	1	0.108	1	0.21	0	SE
ENSG00000198208	RPS6KL1	ENST00000358328	CCDS9834.2	PRINCIPAL:1	14	-	0.593,0.76,1.0,0.733,0.529,1.0,0.851,0.895,0.875,0.862	0.652,1.0,0.947,0.939,1.0,NA,0.882,0.962,0.951,0.913	-0.106	5.63e-08	2.88e-06	chr14:75375553:75375635:-@chr14:75374138:75374233:-@chr14:75373721:75373827:-	ENST00000358328	0.51	0.227	0.948	0.472	0.818	0.078	0.018	0.463	0.509	0.033	0.882	0.413	0.048	0.948	21.322	1.13	56.756	0.096	0.117	0	0.108	0	0	1	0	0	1	1	0.108	1	0.21	0	SE
ENSG00000198208	RPS6KL1	ENST00000557413	CCDS9834.2	PRINCIPAL:1	14	-	0.593,0.76,1.0,0.733,0.529,1.0,0.851,0.895,0.875,0.862	0.652,1.0,0.947,0.939,1.0,NA,0.882,0.962,0.951,0.913	-0.106	5.63e-08	2.88e-06	chr14:75375553:75375635:-@chr14:75374138:75374233:-@chr14:75373721:75373827:-	ENST00000557413	0.51	0.227	0.948	0.472	0.818	0.078	0.018	0.463	0.509	0.033	0.882	0.413	0.048	0.948	21.322	1.13	56.756	0.096	0.117	0	0.108	0	0	1	0	0	1	1	0.108	1	0.21	0	SE
ENSG00000203780	FANK1	NA	NA	NA	10	+	0.667,0.667,0.375,0.176,0.733,1.0,0.867,1.0,0.733,0.667	1.0,0.5,0.25,0.25,0.333,0.0,0.214,0.2,0.333,0.579	0.323	2.23e-07	1.06e-05	chr10:127585108:127585224:+@chr10:127668730:127668907:+@chr10:127677120:127677244:+	ENST00000417114	0.51	0.32	0.928	0.508	0.816	0.389	0.035	0.928	0.552	0.049	0.905	0.058	0.021	0.294	31.185	1.471	70.87	0.102	0.698	0.57	0.211	3	10.5	0.31	0.224	0.138	0.397	0.224	0.337	0	0	0	SE
ENSG00000105483	CARD8	ENST00000447740	CCDS12712.2	PRINCIPAL:3	19	-	0.525,0.852,0.784,0.652,0.786,1.0,0.676,0.702,0.698,0.895	0.625,0.667,0.926,0.778,1.0,1.0,0.833,0.946,1.0,0.818	-0.102	3.37e-06	0.000131	chr19:48724987:48725112:-@chr19:48722128:48722269:-@chr19:48718597:48718641:-	ENST00000447740	0.51	0.031	0.922	0.391	0.722	0.352	0.039	0.922	0.543	0.054	0.913	0.104	0.022	0.521	29.817	3.353	64.1	0.142	0.35	0	0.207	0	0	1	0	0	1	1	0.207	1	0.19	0	SE
ENSG00000105483	CARD8	ENST00000520153	CCDS12712.2	PRINCIPAL:3	19	-	0.525,0.852,0.784,0.652,0.786,1.0,0.676,0.702,0.698,0.895	0.625,0.667,0.926,0.778,1.0,1.0,0.833,0.946,1.0,0.818	-0.102	3.37e-06	0.000131	chr19:48724987:48725112:-@chr19:48722128:48722269:-@chr19:48718597:48718641:-	ENST00000520153	0.51	0.031	0.922	0.391	0.722	0.352	0.039	0.922	0.543	0.054	0.913	0.104	0.022	0.521	29.817	3.353	64.1	0.142	0.35	0	0.207	0	0	1	0	0	1	1	0.207	1	0.19	0	SE
ENSG00000105483	CARD8	ENST00000521613	CCDS12712.2	PRINCIPAL:3	19	-	0.525,0.852,0.784,0.652,0.786,1.0,0.676,0.702,0.698,0.895	0.625,0.667,0.926,0.778,1.0,1.0,0.833,0.946,1.0,0.818	-0.102	3.37e-06	0.000131	chr19:48724987:48725112:-@chr19:48722128:48722269:-@chr19:48718597:48718641:-	ENST00000521613	0.51	0.031	0.922	0.391	0.722	0.352	0.039	0.922	0.543	0.054	0.913	0.104	0.022	0.521	29.817	3.353	64.1	0.142	0.35	0	0.207	0	0	1	0	0	1	1	0.207	1	0.19	0	SE
ENSG00000148950	IMMP1L	ENST00000278200	CCDS7874.1	PRINCIPAL:1	11	-	0.793,0.909,0.803,0.955,0.93,0.68,0.875,0.833,1.0,0.859	0.733,0.956,0.667,0.72,0.857,0.667,0.747,0.714,0.818,0.708	0.105	1.41e-05	0.000477	chr11:31531066:31531139:-@chr11:31484719:31484852:-@chr11:31477860:31477933:-	ENST00000278200	0.51	0.417	0.955	0.499	0.876	0.096	0.017	0.806	0.15	0.026	0.908	0.753	0.025	0.955	18.039	1.481	54.089	0.084	0.834	0.638	0.189	1	16	0.556	0.444	0.444	0.556	0.556	0.389	0	0	0	SE
ENSG00000136270	TBRG4	NA	NA	NA	7	-	0.543,0.616,0.774,0.776,0.742,0.397,0.686,0.766,0.664,0.81	0.589,0.782,0.817,0.805,0.83,1.0,0.702,0.705,0.818,0.812	-0.109	1.49e-05	0.000497	chr7:45145040:45145363:-@chr7:45144137:45144308:-@chr7:45142630:45143042:-	ENST00000461363	0.51	0.309	0.953	0.528	0.885	0.023	0.017	0.078	0.195	0.028	0.898	0.782	0.08	0.953	21.254	0.857	60.533	0.093	0.5	0.5	0.137	1	0	0.5	0	0	0.982	0.018	0.146	0	0	0	SE
ENSG00000037757	MRI1	NA	NA	NA	19	+	0.667,1.0,0.615,0.7,0.5,1.0,1.0,0.8,0.895,1.0	0.407,0.733,0.422,0.75,0.586,NA,0.778,0.92,0.655,0.692	0.157	3.62e-05	0.00104	chr19:13875685:13875923:+@chr19:13876768:13876943:+@chr19:13879173:13879371:+	ENST00000593245	0.51	0.22	0.955	0.518	0.861	0.099	0.016	0.872	0.274	0.027	0.916	0.627	0.019	0.955	18.501	0.8	97.478	0.082	0.448	0	0.141	0	0	1	0	0	1	1	0.141	0.864	0.389	0	SE
ENSG00000111907	TPD52L1	ENST00000534000	CCDS5130.1	PRINCIPAL:2	6	+	0.132,0.117,0.331,0.262,0.292,0.498,0.248,0.296,0.248,0.498	0.159,0.333,0.335,0.267,0.271,0.964,0.148,0.398,0.615,0.438	-0.101	0.00107	0.0195	chr6:125569428:125569529:+@chr6:125574863:125574901:+@chr6:125583980:125584643:+	ENST00000534000	0.51	0.566	0.839	0.481	0.658	0.278	0.069	0.5	0.655	0.458	0.839	0.068	0.043	0.12	29.303	14.114	46.348	0.261	0.502	0.752	0.287	1	2	0.429	0.143	0.143	0.786	0.071	0.354	1	0.079	0	SE
ENSG00000078304	PPP2R5C	NA	NA	NA	14	+	0.39,0.2,0.13,0.0,0.161,0.125,0.0,0.053,0.105,0.029	0.388,0.156,0.163,0.083,0.106,1.0,0.12,0.014,0.517,0.304	-0.166	0.00114	0.0207	chr14:102276206:102276373:+@chr14:102298038:102298141:+@chr14:102302506:102302910:+	ENST00000554442	0.51	0.048	0.946	0.413	0.744	0.076	0.025	0.319	0.515	0.028	0.875	0.409	0.066	0.946	23.306	6.087	61.75	0.114	0.502	0.502	0.207	1	1	0.972	0.028	0.028	0.972	0.972	0.216	0	0	0	SE
ENSG00000095794	CREM	NA	NA	NA	10	+	0.818,0.661,0.538,0.486,0.618,0.556,0.63,0.613,0.679,0.538	0.639,0.191,0.511,0.63,0.576,NA,0.486,0.556,0.419,0.514	0.111	0.00272	0.0441	chr10:35415876:35416121:+@chr10:35468062:35468204:+@chr10:35495823:35495979:+	ENST00000495301	0.51	0.406	0.908	0.518	0.774	0.334	0.052	0.907	0.623	0.064	0.908	0.042	0.027	0.058	30.037	11.826	51.946	0.173	0.877	0.639	0.302	1	10	0.333	0.667	0.667	0.333	0.333	0.527	0	0	0	SE
ENSG00000132635	PCED1A	NA	NA	NA	20	-	1.0,0.92,1.0,0.826,1.0,0.407,0.942,1.0,0.909,0.95	1.0,1.0,1.0,1.0,1.0,1.0,1.0,0.964,1.0,1.0	-0.101	1.01e-05	0.00035	chr20:2821512:2821836:-@chr20:2820435:2820579:-@chr20:2819838:2819917:-	ENST00000439542	0.5	0.417	0.952	0.519	0.843	0.247	0.02	0.931	0.335	0.028	0.925	0.419	0.022	0.952	22.531	1.29	59.053	0.085	0.686	0.561	0.155	1	12	0.714	0.286	0.286	0.714	0.714	0.271	0.524	0.089	0	SE
ENSG00000206562	METTL6	NA	NA	NA	3	-	0.471,0.385,0.6,0.417,0.5,0.143,0.333,0.75,0.667,0.529	0.22,0.52,0.6,0.111,0.5,NA,0.333,0.111,0.167,0.375	0.153	0.00024	0.00518	chr3:15457279:15457449:-@chr3:15457005:15457090:-@chr3:15455528:15455669:-	ENST00000453819	0.5	0	0.924	0.519	0.776	0.127	0.022	0.69	0.556	0.054	0.921	0.316	0.031	0.924	22.148	3.176	55.448	0.081	0.168	0	0.107	0	0	1	0	0	1	1	0.107	0.033	0.012	0	SE
ENSG00000170634	ACYP2	NA	NA	NA	2	+	0.867,0.333,0.636,0.846,0.818,1.0,0.6,1.0,0.111,0.75	0.692,0.25,0.636,1.0,1.0,NA,0.143,0.0,0.0,0.75	0.199	0.0014	0.0249	chr2:54200850:54200947:+@chr2:54284376:54284497:+@chr2:54362590:54362606:+	ENST00000422521	0.5	0.001	0.928	0.487	0.772	0.517	0.042	0.928	0.442	0.053	0.914	0.04	0.018	0.117	23.825	4.645	54.895	0.08	0.251	0	0.127	0	0	1	0	0	1	1	0.127	0	0	0	SE
ENSG00000163104	SMARCAD1	ENST00000359052	CCDS47101.1	ALTERNATIVE:1	4	+	0.61,0.584,0.72,0.413,0.584,NA,0.632,0.544,0.652,0.584	0.445,0.335,0.319,0.595,0.319,NA,0.299,0.555,0.332,0.539	0.176	1.01e-28	1.94e-26	chr4:95199766:95199884:+@chr4:95200074|95200079:95200201:+	ENST00000359052	0.58	0.456	0.951	0.511	0.81	0.025	0.018	0.063	0.29	0.031	0.894	0.686	0.075	0.951	25.507	1	67.2	0.092	0.582	0.557	0.161	1	10	0.773	0.227	0.227	0.773	0.773	0.251	0.545	0.083	0	A3SS
ENSG00000163104	SMARCAD1	ENST00000457823	CCDS47101.1	ALTERNATIVE:1	4	+	0.61,0.584,0.72,0.413,0.584,NA,0.632,0.544,0.652,0.584	0.445,0.335,0.319,0.595,0.319,NA,0.299,0.555,0.332,0.539	0.176	1.01e-28	1.94e-26	chr4:95199766:95199884:+@chr4:95200074|95200079:95200201:+	ENST00000457823	0.58	0.456	0.951	0.511	0.81	0.025	0.018	0.063	0.29	0.031	0.894	0.686	0.075	0.951	25.507	1	67.2	0.092	0.582	0.557	0.161	1	10	0.773	0.227	0.227	0.773	0.773	0.251	0.545	0.083	0	A3SS
ENSG00000184060	ADAP2	ENST00000580525	-	ALTERNATIVE:2	17	+	0.448,0.196,0.153,0.245,0.153,0.0,0.289,0.565,0.055,0.352	0.289,0.169,0.0,0.051,0.0,NA,0.169,0.258,0.092,0.262	0.102	2.77e-09	1.46e-07	chr17:29249957:29250088:+@chr17:29253827|29253844:29253936:+	ENST00000580525	0.66	0.319	0.949	0.495	0.892	0.03	0.017	0.109	0.363	0.032	0.902	0.608	0.055	0.949	25.985	3.143	54.205	0.094	0.236	0	0.136	0	0	1	0	0	1	1	0.136	1	0.325	0	A3SS
ENSG00000102312	PORCN	ENST00000359882	CCDS14298.1	PRINCIPAL:4	X	+	0.798,0.77,0.9,0.339,0.477,NA,0.536,0.381,0.915,0.804	0.867,0.744,0.941,0.885,0.776,1.0,1.0,0.854,0.649,0.744	-0.188	6.71e-05	0.00131	chrX:48368171:48368344:+@chrX:48369683|48369753:48369875:+	ENST00000359882	0.76	0.417	0.955	0.521	0.908	0.02	0.016	0.031	0.116	0.027	0.912	0.865	0.059	0.955	17.168	2	45.913	0.123	0.352	0	0.2	0	0	1	0	0	1	1	0.2	0.727	0.166	0	A3SS
ENSG00000102312	PORCN	NA	NA	NA	X	+	0.798,0.77,0.9,0.339,0.477,NA,0.536,0.381,0.915,0.804	0.867,0.744,0.941,0.885,0.776,1.0,1.0,0.854,0.649,0.744	-0.188	6.71e-05	0.00131	chrX:48368171:48368344:+@chrX:48369683|48369753:48369875:+	ENST00000537758	0.7	0.417	0.955	0.55	0.902	0.021	0.015	0.093	0.141	0.027	0.91	0.838	0.062	0.955	17.352	1.733	53.913	0.121	0.321	0	0.198	0	0	1	0	0	1	1	0.198	0.727	0.163	0	A3SS
ENSG00000102312	PORCN	NA	NA	NA	X	+	0.798,0.77,0.9,0.339,0.477,NA,0.536,0.381,0.915,0.804	0.867,0.744,0.941,0.885,0.776,1.0,1.0,0.854,0.649,0.744	-0.188	6.71e-05	0.00131	chrX:48368171:48368344:+@chrX:48369683|48369753:48369875:+	ENST00000355961	0.74	0.417	0.955	0.538	0.909	0.021	0.017	0.053	0.125	0.026	0.916	0.855	0.056	0.955	17.164	2.353	49.13	0.119	0.285	0	0.181	0	0	1	0	0	1	1	0.181	0.727	0.166	0	A3SS
ENSG00000102312	PORCN	ENST00000361988	CCDS14296.1	ALTERNATIVE:1	X	+	0.798,0.77,0.9,0.339,0.477,NA,0.536,0.381,0.915,0.804	0.867,0.744,0.941,0.885,0.776,1.0,1.0,0.854,0.649,0.744	-0.188	6.71e-05	0.00131	chrX:48368171:48368344:+@chrX:48369683|48369753:48369875:+	ENST00000361988	0.73	0.417	0.955	0.573	0.912	0.02	0.015	0.045	0.127	0.026	0.915	0.853	0.055	0.955	17.664	1.867	51.565	0.123	0.376	0	0.2	0	0	1	0	0	1	1	0.2	0.727	0.169	0	A3SS
ENSG00000102312	PORCN	NA	NA	NA	X	+	0.798,0.77,0.9,0.339,0.477,NA,0.536,0.381,0.915,0.804	0.867,0.744,0.941,0.885,0.776,1.0,1.0,0.854,0.649,0.744	-0.188	6.71e-05	0.00131	chrX:48368171:48368344:+@chrX:48369683|48369753:48369875:+	ENST00000326194	0.7	0.417	0.955	0.55	0.902	0.021	0.015	0.093	0.141	0.027	0.91	0.838	0.062	0.955	17.352	1.733	53.913	0.121	0.321	0	0.198	0	0	1	0	0	1	1	0.198	0.727	0.163	0	A3SS
ENSG00000102312	PORCN	ENST00000355092	CCDS14298.1	PRINCIPAL:4	X	+	0.798,0.77,0.9,0.339,0.477,NA,0.536,0.381,0.915,0.804	0.867,0.744,0.941,0.885,0.776,1.0,1.0,0.854,0.649,0.744	-0.188	6.71e-05	0.00131	chrX:48368171:48368344:+@chrX:48369683|48369753:48369875:+	ENST00000355092	0.76	0.417	0.955	0.521	0.908	0.02	0.016	0.031	0.116	0.027	0.912	0.865	0.059	0.955	17.168	2	45.913	0.123	0.352	0	0.2	0	0	1	0	0	1	1	0.2	0.727	0.166	0	A3SS
ENSG00000100852	ARHGAP5	NA	NA	NA	14	+	0.741,0.753,0.798,0.852,0.87,0.799,0.858,0.86,0.828,0.838	0.706,0.799,0.801,0.79,0.623,0.0,0.722,0.709,0.74,0.758	0.155	0.00496	0.0451	chr14:32559707:32563592:+@chr14:32586346|32586348:32586493:+	ENST00000554090	0.63	0.447	0.949	0.573	0.85	0.039	0.019	0.096	0.409	0.032	0.902	0.552	0.053	0.949	29.274	2.074	75.4	0.107	0.85	0.661	0.187	1	12	0.556	0.444	0.444	0.556	0.556	0.398	0.519	0.114	0	A3SS
ENSG00000102125	TAZ	NA	NA	NA	X	+	0.125,0.04,0.105,0.077,0.2,0.034,0.158,0.026,0.049,0.098	0.059,0.19,0.296,0.061,0.355,1.0,0.125,0.208,0.353,0.191	-0.193	1.98e-09	8.46e-08	chrX:153641544:153641676|153641589:+@chrX:153641818:153641904:+	ENST00000369790	0.72	0.444	0.899	0.494	0.664	0.09	0.024	0.404	0.384	0.077	0.753	0.526	0.097	0.899	14.685	3.6	39.8	0.085	0.117	0	0.096	0	0	1	0	0	1	1	0.096	1	0.153	0	A5SS
ENSG00000102125	TAZ	NA	NA	NA	X	+	0.125,0.04,0.105,0.077,0.2,0.034,0.158,0.026,0.049,0.098	0.059,0.19,0.296,0.061,0.355,1.0,0.125,0.208,0.353,0.191	-0.193	1.98e-09	8.46e-08	chrX:153641544:153641676|153641589:+@chrX:153641818:153641904:+	ENST00000426834	0.79	0.444	0.875	0.459	0.703	0.096	0.033	0.324	0.538	0.169	0.875	0.366	0.059	0.777	17.459	3.725	60.7	0.087	0.103	0	0.098	0	0	1	0	0	1	1	0.098	1	0.165	0	A5SS
ENSG00000102125	TAZ	NA	NA	NA	X	+	0.125,0.04,0.105,0.077,0.2,0.034,0.158,0.026,0.049,0.098	0.059,0.19,0.296,0.061,0.355,1.0,0.125,0.208,0.353,0.191	-0.193	1.98e-09	8.46e-08	chrX:153641544:153641676|153641589:+@chrX:153641818:153641904:+	ENST00000299328	0.75	0.444	0.873	0.457	0.678	0.093	0.035	0.148	0.564	0.231	0.873	0.343	0.062	0.681	15.33	3.706	62.8	0.086	0.099	0	0.091	0	0	1	0	0	1	1	0.091	1	0.098	0	A5SS
ENSG00000102125	TAZ	ENST00000350743	CCDS14749.1	PRINCIPAL:1	X	+	0.125,0.04,0.105,0.077,0.2,0.034,0.158,0.026,0.049,0.098	0.059,0.19,0.296,0.061,0.355,1.0,0.125,0.208,0.353,0.191	-0.193	1.98e-09	8.46e-08	chrX:153641544:153641676|153641589:+@chrX:153641818:153641904:+	ENST00000350743	0.73	0.444	0.862	0.515	0.675	0.1	0.027	0.414	0.407	0.1	0.751	0.493	0.067	0.862	17.617	4.51	48.75	0.098	0.169	0	0.125	0	0	1	0	0	1	1	0.125	1	0.118	0	A5SS
ENSG00000102125	TAZ	NA	NA	NA	X	+	0.125,0.04,0.105,0.077,0.2,0.034,0.158,0.026,0.049,0.098	0.059,0.19,0.296,0.061,0.355,1.0,0.125,0.208,0.353,0.191	-0.193	1.98e-09	8.46e-08	chrX:153641544:153641676|153641589:+@chrX:153641818:153641904:+	ENST00000454722	0.74	0.444	0.84	0.508	0.699	0.148	0.031	0.672	0.436	0.124	0.839	0.416	0.053	0.84	17.119	5.176	56	0.087	0.116	0	0.101	0	0	1	0	0	1	1	0.101	1	0.126	0	A5SS
ENSG00000102125	TAZ	NA	NA	NA	X	+	0.125,0.04,0.105,0.077,0.2,0.034,0.158,0.026,0.049,0.098	0.059,0.19,0.296,0.061,0.355,1.0,0.125,0.208,0.353,0.191	-0.193	1.98e-09	8.46e-08	chrX:153641544:153641676|153641589:+@chrX:153641818:153641904:+	ENST00000351413	0.78	0.444	0.843	0.399	0.668	0.152	0.031	0.412	0.531	0.147	0.843	0.318	0.062	0.812	15.855	5.294	53.7	0.088	0.097	0	0.093	0	0	1	0	0	1	1	0.093	1	0.121	0	A5SS
ENSG00000102125	TAZ	NA	NA	NA	X	+	0.125,0.04,0.105,0.077,0.2,0.034,0.158,0.026,0.049,0.098	0.059,0.19,0.296,0.061,0.355,1.0,0.125,0.208,0.353,0.191	-0.193	1.98e-09	8.46e-08	chrX:153641544:153641676|153641589:+@chrX:153641818:153641904:+	ENST00000369776	0.72	0.444	0.865	0.387	0.644	0.28	0.056	0.733	0.53	0.217	0.865	0.189	0.027	0.671	13.389	3.333	46.65	0.079	0.098	0	0.089	0	0	1	0	0	1	1	0.089	0.882	0.211	0	A5SS
ENSG00000102125	TAZ	NA	NA	NA	X	+	0.125,0.04,0.105,0.077,0.2,0.034,0.158,0.026,0.049,0.098	0.059,0.19,0.296,0.061,0.355,1.0,0.125,0.208,0.353,0.191	-0.193	1.98e-09	8.46e-08	chrX:153641544:153641676|153641589:+@chrX:153641818:153641904:+	ENST00000439735	0.78	0.444	0.853	0.459	0.663	0.147	0.032	0.614	0.481	0.133	0.853	0.373	0.066	0.835	18.237	5.529	62.15	0.092	0.125	0	0.109	0	0	1	0	0	1	1	0.109	1	0.119	0	A5SS
ENSG00000102125	TAZ	NA	NA	NA	X	+	0.125,0.04,0.105,0.077,0.2,0.034,0.158,0.026,0.049,0.098	0.059,0.19,0.296,0.061,0.355,1.0,0.125,0.208,0.353,0.191	-0.193	1.98e-09	8.46e-08	chrX:153641544:153641676|153641589:+@chrX:153641818:153641904:+	ENST00000475699	0.79	0.444	0.81	0.419	0.607	0.173	0.042	0.501	0.456	0.164	0.81	0.371	0.06	0.761	16.143	5.294	51.6	0.09	0.118	0	0.1	0	0	1	0	0	1	1	0.1	1	0.116	0	A5SS
ENSG00000148688	RPP30	ENST00000371703	CCDS7411.1	PRINCIPAL:1	10	+	0.623,0.586,0.867,0.84,0.882,0.515,0.73,0.857,1.0,0.66	0.787,0.833,0.895,0.826,0.879,1.0,0.917,1.0,0.889,0.949	-0.141	1.08e-05	0.000237	chr10:92654532:92655240|92654648:+@chr10:92655636:92655674:+	ENST00000371703	0.65	0.453	0.953	0.674	0.874	0.165	0.018	0.929	0.297	0.027	0.907	0.538	0.024	0.953	22.01	0.783	60	0.087	0.247	0	0.12	0	0	1	0	0	1	1	0.12	1	0.193	0	A5SS
ENSG00000148688	RPP30	NA	NA	NA	10	+	0.623,0.586,0.867,0.84,0.882,0.515,0.73,0.857,1.0,0.66	0.787,0.833,0.895,0.826,0.879,1.0,0.917,1.0,0.889,0.949	-0.141	1.08e-05	0.000237	chr10:92654532:92655240|92654648:+@chr10:92655636:92655674:+	ENST00000413330	0.7	0.453	0.952	0.488	0.851	0.156	0.018	0.928	0.273	0.028	0.91	0.571	0.025	0.952	22.773	1.913	60.4	0.085	0.263	0	0.126	0	0	1	0	0	1	1	0.126	1	0.193	0	A5SS
ENSG00000148688	RPP30	NA	NA	NA	10	+	0.623,0.586,0.867,0.84,0.882,0.515,0.73,0.857,1.0,0.66	0.787,0.833,0.895,0.826,0.879,1.0,0.917,1.0,0.889,0.949	-0.141	1.08e-05	0.000237	chr10:92654532:92655240|92654648:+@chr10:92655636:92655674:+	ENST00000277882	0.61	0.453	0.953	0.644	0.884	0.165	0.018	0.931	0.293	0.027	0.907	0.542	0.023	0.953	21.717	0.87	61.5	0.086	0.279	0	0.125	0	0	1	0	0	1	1	0.125	1	0.202	0	A5SS
ENSG00000148688	RPP30	NA	NA	NA	10	+	0.623,0.586,0.867,0.84,0.882,0.515,0.73,0.857,1.0,0.66	0.787,0.833,0.895,0.826,0.879,1.0,0.917,1.0,0.889,0.949	-0.141	1.08e-05	0.000237	chr10:92654532:92655240|92654648:+@chr10:92655636:92655674:+	ENST00000414836	0.7	0.453	0.954	0.658	0.885	0.161	0.018	0.927	0.277	0.027	0.915	0.562	0.023	0.954	21.22	1.391	62.2	0.087	0.185	0	0.112	0	0	1	0	0	1	1	0.112	1	0.268	0	A5SS
ENSG00000115234	SNX17	ENST00000233575	CCDS1750.1	PRINCIPAL:1	2	+	0.73,0.818,0.5,0.636,0.81,0.556,0.474,0.778,0.576,0.697	0.6,0.273,0.333,0.3,0.44,NA,0.467,0.818,0.294,0.676	0.191	0.000362	0.00476	chr2:27594136:27594335|27594210:+@chr2:27596113:27596178:+	ENST00000233575	0.69	0.484	0.952	0.478	0.893	0.234	0.017	0.913	0.133	0.029	0.871	0.633	0.018	0.952	14.012	1.217	39.105	0.083	0.251	0	0.107	0	0	1	0	0	1	1	0.107	1	0.274	0	A5SS
ENSG00000115234	SNX17	NA	NA	NA	2	+	0.73,0.818,0.5,0.636,0.81,0.556,0.474,0.778,0.576,0.697	0.6,0.273,0.333,0.3,0.44,NA,0.467,0.818,0.294,0.676	0.191	0.000362	0.00476	chr2:27594136:27594335|27594210:+@chr2:27596113:27596178:+	ENST00000427123	0.76	0.484	0.952	0.431	0.87	0.418	0.018	0.922	0.168	0.028	0.923	0.413	0.02	0.952	17.443	1.714	45.826	0.088	0.329	0	0.123	1	0	1	0	0	1	1	0.123	1	0.329	0	A5SS
ENSG00000167733	HSD11B1L	NA	NA	NA	19	+	0.375,0.667,0.7,0.278,0.659,0.905,0.412,0.28,0.789,0.364	1.0,0.45,0.616,0.509,0.81,1.0,0.538,0.55,0.742,0.535	-0.132	0.00201	0.021	chr19:5684830:5685130|5684916:+@chr19:5686910:5687002:+	ENST00000301382	0.59	0.262	0.928	0.494	0.834	0.475	0.042	0.928	0.479	0.052	0.9	0.047	0.019	0.13	21.094	2.174	49.75	0.09	0.599	0.541	0.176	1	3	0.875	0.125	0.125	0.875	0.875	0.221	0	0	0	A5SS

## Sheet: Supple Table 5_FeaturesInfo
ID	Descriptions
APPRIS_Principal Isoform	principal isoform flag by APPRIS database
ss_1	max probability of all amino acids' most probable structure in translated amino acid sequence.
ss_2	min probability of all amino acids' most probable structure in translated amino acid sequence.
ss_3	average probability of all amino acids' most probable structure in translated amino acid sequence
ss_4	average probability of the amino acid in beta sheet structure.
ss_5	min probability of the amino acid in beta sheet structure.
ss_6	max probability of the amino acid in beta sheet structure.
ss_7	average probability of the amino acid in coil.
ss_8	min probability of the amino acid in coil.
ss_9	max probability of the amino acid in coil.
ss_10	ave probability of the amino acid in alpha-helix structure.
ss_11	min probability of the amino acid in alpha-helix structure.
ss_12	max probability of the amino acid in alpha-helix structure.
asa_1	average ASA in translated amino acid sequence.
asa_2	min ASA in translated amino acid sequence.
asa_3	max ASA in translated amino acid sequence.
disorder_score_1	min disorder score in exons' translated amino acid sequence.
disorder_score_2	max disorder score in exons' translated amino acid sequence.
disorder_score_3	average score of disorder region.
disorder_score_4	average score of structured region.
disorder_score_5	times of switch between disorder region and structured region.
disorder_score_6	average disorder region length.
disorder_score_7	average structured region length.
disorder_score_8	max disorder region length.
disorder_score_9	min disorder region length.
disorder_score_10	max structured region length.
disorder_score_11	min structured region length.
disorder_score_12	average disorder score of the exon.
plylop	average phylop score of the exon.
pfam1	domain coverage percentile of the exon.
pfam2	overlap percentile with domain.
ptm	normalized number of PTM sites in the exon.

## Sheet: Supple Table 6_FIMO
CHR_FIMOPrediction	Start_FIMOPrediction	END_FIMOPrediction	Strand	SRSF2_M070_Count	SRSF2_M274_Count	GeneID	geneSymbol	GENENAME	Region__FIMOPrediction	chr	strand	exonStart_0base	exonEnd	upstreamES	upstreamEE	downstreamES	downstreamEE	PValue	FDR	IncLevel_Cyto	IncLevel_Cont	IncLevelDifference_CytovsCont
19	5913932	5914232	+	1	0	ENSG00000267314	AC104532.2	NA	Region3	19	+	5914231	5914320	5904851	5905092	5914395	5914500	0.00116663	0.021064	0.722,1.0,0.895,0.857,1.0,1.0,0.682,0.333,0.571,0.931	0.964,0.96,0.962,0.946,0.854,1.0,0.974,0.941,0.81,0.909	-0.133
19	5914096	5914396	+	2	1	ENSG00000267314	AC104532.2	NA	Region6	19	+	5914231	5914320	5904851	5905092	5914395	5914500	0.00116663	0.021064	0.722,1.0,0.895,0.857,1.0,1.0,0.682,0.333,0.571,0.931	0.964,0.96,0.962,0.946,0.854,1.0,0.974,0.941,0.81,0.909	-0.133
1	155034451	155034751	+	6	2	ENSG00000143537	ADAM15	ADAM metallopeptidase domain 15	Region5	1	+	155034379	155034451	155033890	155033965	155034720	155034845	0.000336534	0.00694765	0.46,0.773,0.766,0.75,0.671,0.751,0.792,0.565,0.605,0.833	0.487,0.691,0.889,0.845,0.683,1.0,0.973,0.887,0.813,0.746	-0.105
1	155034593	155034893	+	8	3	ENSG00000143537	ADAM15	ADAM metallopeptidase domain 15	Region5	1	+	155034379	155034593	155033890	155033965	155034720	155034845	9.64e-05	0.00226169	0.419,0.556,0.6,0.591,0.455,0.686,0.679,0.353,0.514,0.75	0.563,0.5,0.818,0.7,0.538,1.0,0.952,0.778,0.742,0.619	-0.161
1	155034421	155034721	+	2	0	ENSG00000143537	ADAM15	ADAM metallopeptidase domain 15	Region6	1	+	155034379	155034593	155033890	155033965	155034720	155034845	9.64e-05	0.00226169	0.419,0.556,0.6,0.591,0.455,0.686,0.679,0.353,0.514,0.75	0.563,0.5,0.818,0.7,0.538,1.0,0.952,0.778,0.742,0.619	-0.161
1	155034421	155034721	+	2	0	ENSG00000143537	ADAM15	ADAM metallopeptidase domain 15	Region6	1	+	155034379	155034451	155033890	155033965	155034720	155034845	0.000336534	0.00694765	0.46,0.773,0.766,0.75,0.671,0.751,0.792,0.565,0.605,0.833	0.487,0.691,0.889,0.845,0.683,1.0,0.973,0.887,0.813,0.746	-0.105
17	29253527	29253827	+	0	1	ENSG00000184060	ADAP2	ArfGAP with dual PH domains 2	Region3	17	+	29253826	29253936	29249957	29250088	29258906	29258986	9.78e-05	0.00228971	0.778,0.867,0.867,1.0,1.0,1.0,0.778,0.727,1.0,0.905	0.7,0.824,0.786,0.931,0.4,NA,1.0,0.907,0.538,0.824	0.124
10	5922339	5922639	-	1	0	ENSG00000134461	ANKRD16	ankyrin repeat domain 16	Region5	10	-	5922260	5922339	5920049	5920250	5924968	5925130	0.000161262	0.00360991	1.0,0.714,0.923,1.0,1.0,1.0,1.0,0.913,0.611,0.938	0.758,0.918,0.828,0.935,0.797,0.474,0.917,0.762,0.737,0.927	0.105
11	47193961	47194261	-	1	0	ENSG00000149182	ARFGAP2	ADP ribosylation factor GTPase activating protein 2	Region3	11	-	47194260	47194302	47193831	47193884	47194976	47195033	3.69e-10	2.53e-08	0.192,0.46,0.223,0.441,0.45,0.252,0.306,0.404,0.389,0.339	0.177,0.729,0.397,0.461,0.419,1.0,0.42,0.509,0.354,0.454	-0.146
chr11	13331457	13331607	+	0	1	ENSG00000133794	ARNTL	aryl hydrocarbon receptor nuclear translocator like	Region1	11	+	13347959	13348014	13331533	13331606	13371491	13371617	0.000147934	0.00334152	0.414,0.684,0.429,0.614,0.292,0.0,0.194,0.403,0.6,0.574	0.443,0.162,0.292,0.51,0.0,NA,0.536,0.29,0.224,0.194	0.126
2	234181699	234181999	+	0	1	ENSG00000085978	ATG16L1	autophagy related 16 like 1	Region2	2	+	234182366	234182423	234181611	234181698	234183321	234183424	1.12e-05	0.000387866	0.759,0.448,0.363,0.829,0.468,0.511,0.47,0.433,0.436,0.655	0.824,0.332,0.71,0.826,0.787,NA,0.454,0.57,0.647,0.635	-0.106
7	149566948	149567248	-	0	1	ENSG00000204934	ATP6V0E2-AS1	ATP6V0E2 antisense RNA 1	Region2	7	-	149567330	149567440	149564860	149566947	149568730	149568885	2.54e-18	3.46e-16	1.0,1.0,0.826,1.0,0.8,1.0,0.941,0.657,0.871,0.951	0.778,0.833,0.467,0.75,0.6,1.0,0.81,0.535,0.917,0.846	0.151
7	149568731	149568881	-	0	1	ENSG00000204934	ATP6V0E2-AS1	ATP6V0E2 antisense RNA 1	Region7	7	-	149567330	149567440	149564860	149566947	149568730	149568885	2.54e-18	3.46e-16	1.0,1.0,0.826,1.0,0.8,1.0,0.941,0.657,0.871,0.951	0.778,0.833,0.467,0.75,0.6,1.0,0.81,0.535,0.917,0.846	0.151
2	127809531	127809831	-	2	0	ENSG00000136717	BIN1	bridging integrator 1	Region3	2	-	127809830	127809938	127808729	127808819	127811480	127811588	0.000162589	0.00363588	0.0,0.75,0.538,0.857,1.0,0.818,0.813,0.778,1.0,0.938	NA,NA,0.333,0.667,0.8,0.636,0.895,0.5,0.304,0.769	0.136
2	127809938	127810238	-	1	2	ENSG00000136717	BIN1	bridging integrator 1	Region5	2	-	127809830	127809938	127808729	127808819	127811480	127811588	0.000162589	0.00363588	0.0,0.75,0.538,0.857,1.0,0.818,0.813,0.778,1.0,0.938	NA,NA,0.333,0.667,0.8,0.636,0.895,0.5,0.304,0.769	0.136
2	127811481	127811631	-	1	0	ENSG00000136717	BIN1	bridging integrator 1	Region7	2	-	127809830	127809938	127808729	127808819	127811480	127811588	0.000162589	0.00363588	0.0,0.75,0.538,0.857,1.0,0.818,0.813,0.778,1.0,0.938	NA,NA,0.333,0.667,0.8,0.636,0.895,0.5,0.304,0.769	0.136
22	32843199	32843349	-	0	1	ENSG00000184459	BPIFC	BPI fold containing family C	Region7	22	-	32841827	32841983	32841621	32841685	32843198	32843327	1.13e-07	5.54e-06	1.0,1.0,1.0,0.875,0.913,NA,1.0,1.0,1.0,1.0	0.852,1.0,1.0,0.897,0.914,NA,1.0,0.778,1.0,0.3	0.116
17	56381399	56381699	-	1	0	ENSG00000005379	BZRAP1	TSPO associated protein 1	Region3	17	-	56381698	56381760	56379631	56379808	56382421	56382532	1.17e-06	4.99e-05	0.0,0.523,0.434,0.291,0.422,0.354,0.291,0.354,0.247,0.199	0.793,0.578,0.511,0.745,0.324,0.0,0.379,0.733,0.622,0.68	-0.225
17	56381760	56382060	-	1	0	ENSG00000005379	BZRAP1	TSPO associated protein 1	Region5	17	-	56381698	56381760	56379631	56379808	56382421	56382532	1.17e-06	4.99e-05	0.0,0.523,0.434,0.291,0.422,0.354,0.291,0.354,0.247,0.199	0.793,0.578,0.511,0.745,0.324,0.0,0.379,0.733,0.622,0.68	-0.225
4	128905429	128905579	+	1	0	ENSG00000164074	C4orf29	abhydrolase domain containing 18	Region1	4	+	128910875	128910976	128905493	128905578	128930074	128930112	4.09e-05	0.00116529	0.887,0.852,0.907,0.486,0.625,0.571,0.647,0.333,0.846,0.789	1.0,0.84,0.8,0.85,0.714,NA,1.0,0.789,0.75,0.926	-0.158
8	22460156	22460456	+	0	1	ENSG00000241852	C8orf58	chromosome 8 open reading frame 58	Region5	8	+	22460049	22460156	22459712	22459825	22460707	22461663	0.00142276	0.0251582	0.909,0.59,0.803,0.571,0.778,0.524,0.519,0.486,0.358,0.63	0.68,0.571,0.747,0.596,0.826,1.0,0.627,0.774,0.755,0.833	-0.124
8	22460408	22460708	+	0	1	ENSG00000241852	C8orf58	chromosome 8 open reading frame 58	Region6	8	+	22460049	22460156	22459712	22459825	22460707	22461663	0.00142276	0.0251582	0.909,0.59,0.803,0.571,0.778,0.524,0.519,0.486,0.358,0.63	0.68,0.571,0.747,0.596,0.826,1.0,0.627,0.774,0.755,0.833	-0.124
19	13321131	13321431	-	4	3	ENSG00000141837	CACNA1A	calcium voltage-gated channel subunit alpha1 A	Region3	19	-	13321430	13321466	13320125	13320312	13322916	13323030	3.08e-05	0.000902927	0.312,0.095,0.134,0.02,0.276,0.0,0.217,0.085,0.14,0.296	0.379,0.364,0.38,0.198,0.317,1.0,0.278,0.287,0.197,0.268	-0.209
19	13321466	13321766	-	1	0	ENSG00000141837	CACNA1A	calcium voltage-gated channel subunit alpha1 A	Region5	19	-	13321430	13321466	13320125	13320312	13322916	13323030	3.08e-05	0.000902927	0.312,0.095,0.134,0.02,0.276,0.0,0.217,0.085,0.14,0.296	0.379,0.364,0.38,0.198,0.317,1.0,0.278,0.287,0.197,0.268	-0.209
19	13322617	13322917	-	3	1	ENSG00000141837	CACNA1A	calcium voltage-gated channel subunit alpha1 A	Region6	19	-	13321430	13321466	13320125	13320312	13322916	13323030	3.08e-05	0.000902927	0.312,0.095,0.134,0.02,0.276,0.0,0.217,0.085,0.14,0.296	0.379,0.364,0.38,0.198,0.317,1.0,0.278,0.287,0.197,0.268	-0.209
12	2743397	2743547	+	1	0	ENSG00000151067	CACNA1C	calcium voltage-gated channel subunit alpha1 C	Region1	12	+	2757640	2757673	2743462	2743546	2760805	2760913	4.54e-07	2.07e-05	0.913,0.444,0.651,0.583,0.759,NA,0.848,0.863,0.863,0.62	0.88,0.848,0.852,1.0,0.848,NA,1.0,1.0,0.777,1.0	-0.185
12	2757673	2757973	+	1	0	ENSG00000151067	CACNA1C	calcium voltage-gated channel subunit alpha1 C	Region5	12	+	2757640	2757673	2743462	2743546	2760805	2760913	4.54e-07	2.07e-05	0.913,0.444,0.651,0.583,0.759,NA,0.848,0.863,0.863,0.62	0.88,0.848,0.852,1.0,0.848,NA,1.0,1.0,0.777,1.0	-0.185
12	2760506	2760806	+	1	0	ENSG00000151067	CACNA1C	calcium voltage-gated channel subunit alpha1 C	Region6	12	+	2757640	2757673	2743462	2743546	2760805	2760913	4.54e-07	2.07e-05	0.913,0.444,0.651,0.583,0.759,NA,0.848,0.863,0.863,0.62	0.88,0.848,0.852,1.0,0.848,NA,1.0,1.0,0.777,1.0	-0.185
19	14501892	14502192	+	1	0	ENSG00000123146	CD97	adhesion G protein-coupled receptor E5	Region2	19	+	14507153	14507285	14501735	14501891	14508469	14508616	0.000693906	0.0132865	0.569,0.41,0.583,0.395,0.469,1.0,0.42,0.514,0.42,0.4	0.524,0.319,0.111,0.179,0.333,NA,0.2,0.135,0.818,0.381	0.185
19	14506854	14507154	+	1	0	ENSG00000123146	CD97	adhesion G protein-coupled receptor E5	Region3	19	+	14507153	14507285	14501735	14501891	14508469	14508616	0.000693906	0.0132866	0.569,0.41,0.583,0.395,0.469,1.0,0.42,0.514,0.42,0.4	0.524,0.319,0.111,0.179,0.333,NA,0.2,0.135,0.818,0.381	0.185
16	29876181	29876481	+	1	0	ENSG00000214725	CDIPT-AS1	CDIPT antisense RNA 1 (head to head)	Region6	16	+	29876048	29876196	29875624	29875712	29876480	29876558	0.000141441	0.00320396	0.867,0.692,0.909,1.0,0.818,1.0,0.8,0.176,0.714,0.889	1.0,1.0,1.0,0.9,0.833,1.0,0.935,0.63,0.826,0.818	-0.108
16	29876481	29876631	+	1	0	ENSG00000214725	CDIPT-AS1	CDIPT antisense RNA 1 (head to head)	Region7	16	+	29876048	29876196	29875624	29875712	29876480	29876558	0.000141441	0.00320396	0.867,0.692,0.909,1.0,0.818,1.0,0.8,0.176,0.714,0.889	1.0,1.0,1.0,0.9,0.833,1.0,0.935,0.63,0.826,0.818	-0.108
22	46640986	46641136	-	0	1	ENSG00000205643	CDPF1	cysteine rich DPF motif domain containing 1	Region1	22	-	46644068	46644181	46639917	46641135	46646152	46646576	0.00257457	0.0421492	1.0,1.0,0.647,1.0,0.692,0.125,0.538,0.692,0.4,0.529	1.0,0.8,0.556,0.5,1.0,NA,0.765,1.0,1.0,0.765	-0.158
22	46641136	46641436	-	1	0	ENSG00000205643	CDPF1	cysteine rich DPF motif domain containing 1	Region2	22	-	46644068	46644181	46639917	46641135	46646152	46646576	0.00257457	0.0421492	1.0,1.0,0.647,1.0,0.692,0.125,0.538,0.692,0.4,0.529	1.0,0.8,0.556,0.5,1.0,NA,0.765,1.0,1.0,0.765	-0.158
22	46643769	46644069	-	1	0	ENSG00000205643	CDPF1	cysteine rich DPF motif domain containing 1	Region3	22	-	46644068	46644181	46639917	46641135	46646152	46646576	0.00257457	0.0421492	1.0,1.0,0.647,1.0,0.692,0.125,0.538,0.692,0.4,0.529	1.0,0.8,0.556,0.5,1.0,NA,0.765,1.0,1.0,0.765	-0.158
14	21904760	21905060	-	3	1	ENSG00000100888	CHD8	chromodomain helicase DNA binding protein 8	Region3	14	-	21905059	21905124	21899969	21900017	21905352	21905424	8.03e-09	4.6e-07	0.617,0.429,0.573,0.517,0.349,NA,0.811,0.578,0.263,0.58	0.446,0.0,0.315,0.211,NA,NA,0.392,0.089,NA,0.326	0.27
14	21905124	21905424	-	6	2	ENSG00000100888	CHD8	chromodomain helicase DNA binding protein 8	Region5	14	-	21905059	21905124	21899969	21900017	21905352	21905424	8.03e-09	4.6e-07	0.617,0.429,0.573,0.517,0.349,NA,0.811,0.578,0.263,0.58	0.446,0.0,0.315,0.211,NA,NA,0.392,0.089,NA,0.326	0.27
14	21905053	21905353	-	6	2	ENSG00000100888	CHD8	chromodomain helicase DNA binding protein 8	Region6	14	-	21905059	21905124	21899969	21900017	21905352	21905424	8.03e-09	4.6e-07	0.617,0.429,0.573,0.517,0.349,NA,0.811,0.578,0.263,0.58	0.446,0.0,0.315,0.211,NA,NA,0.392,0.089,NA,0.326	0.27
5	178043800	178043950	-	1	0	ENSG00000113240	CLK4	CDC like kinase 4	Region1	5	-	178044344	178044435	178043882	178043949	178045556	178045779	7.18e-05	0.00174651	0.894,0.909,0.754,0.947,0.611,0.619,0.737,0.688,0.905,0.83	0.984,1.0,0.833,0.872,0.818,NA,0.867,0.96,0.892,0.833	-0.106
16	50059252	50059552	+	2	0	ENSG00000205423	CNEP1R1	CTD nuclear envelope phosphatase 1 regulatory subunit 1	Region2	16	+	50059561	50059612	50059144	50059251	50060306	50060378	1.64e-05	0.000539095	0.315,0.193,0.13,0.258,0.374,0.0,0.13,0.22,0.159,0.107	0.526,0.166,0.332,0.295,0.843,0.0,0.285,0.121,0.285,0.341	-0.131
16	50059262	50059562	+	2	0	ENSG00000205423	CNEP1R1	CTD nuclear envelope phosphatase 1 regulatory subunit 1	Region3	16	+	50059561	50059612	50059144	50059251	50060306	50060378	1.64e-05	0.000539095	0.315,0.193,0.13,0.258,0.374,0.0,0.13,0.22,0.159,0.107	0.526,0.166,0.332,0.295,0.843,0.0,0.285,0.121,0.285,0.341	-0.131
16	50059612	50059912	+	1	0	ENSG00000205423	CNEP1R1	CTD nuclear envelope phosphatase 1 regulatory subunit 1	Region5	16	+	50059561	50059612	50059144	50059251	50060306	50060378	1.64e-05	0.000539095	0.315,0.193,0.13,0.258,0.374,0.0,0.13,0.22,0.159,0.107	0.526,0.166,0.332,0.295,0.843,0.0,0.285,0.121,0.285,0.341	-0.131
19	7599332	7599632	+	2	3	ENSG00000268614	CTD-2207O23.10	NA	Region5	19	+	7599264	7599332	7599053	7599125	7599635	7599788	0.00105818	0.0193094	0.156,0.868,0.588,0.075,0.654,1.0,0.633,0.428,0.431,0.432	0.512,0.737,0.556,1.0,0.259,NA,0.592,0.647,1.0,0.598	-0.129
19	7599336	7599636	+	2	2	ENSG00000268614	CTD-2207O23.10	NA	Region6	19	+	7599264	7599332	7599053	7599125	7599635	7599788	0.00105818	0.0193094	0.156,0.868,0.588,0.075,0.654,1.0,0.633,0.428,0.431,0.432	0.512,0.737,0.556,1.0,0.259,NA,0.592,0.647,1.0,0.598	-0.129
7	99277449	99277599	-	1	0	ENSG00000106258	CYP3A5	cytochrome P450 family 3 subfamily A member 5	Region7	7	-	99273939	99274199	99273737	99273831	99277448	99277616	0.000324318	0.00672859	0.0,0.036,0.064,0.039,0.024,1.0,0.027,0.024,0.024,0.053	0.0,0.04,0.053,0.0,0.0,0.0,0.013,0.0,0.063,0.048	0.107
4	183838010	183838310	-	0	1	ENSG00000129187	DCTD	dCMP deaminase	Region5	4	-	183837825	183838010	183837571	183837692	183838440	183838498	0.000286722	0.00605499	0.25,0.3,0.067,0.125,0.524,0.032,0.579,0.231,0.286,0.125	0.444,0.692,0.7,0.455,0.25,NA,0.368,0.2,0.176,0.529	-0.172
4	183838141	183838441	-	0	1	ENSG00000129187	DCTD	dCMP deaminase	Region6	4	-	183837825	183838010	183837571	183837692	183838440	183838498	0.000286722	0.00605499	0.25,0.3,0.067,0.125,0.524,0.032,0.579,0.231,0.286,0.125	0.444,0.692,0.7,0.455,0.25,NA,0.368,0.2,0.176,0.529	-0.172
6	30856165	30856465	+	1	0	ENSG00000204580	DDR1	discoidin domain receptor tyrosine kinase 1	Region6	6	+	30853401	30853457	30852314	30852487	30856464	30856591	2.23e-15	2.42e-13	0.535,0.691,0.72,0.672,0.755,0.669,0.673,0.797,0.763,0.747	0.648,0.565,0.529,0.526,0.599,0.445,0.589,0.617,0.623,0.585	0.13
6	30852015	30852315	+	1	1	ENSG00000204580	DDR1	discoidin domain receptor tyrosine kinase 1	Region3	6	+	30852314	30852487	30850861	30850942	30856464	30856591	1.31e-30	3.17e-28	0.456,0.455,0.426,0.531,0.663,0.927,0.556,0.398,0.477,0.468	0.606,0.827,0.854,0.771,1.0,1.0,0.706,0.867,1.0,0.75	-0.302
6	30852487	30852787	+	0	1	ENSG00000204580	DDR1	discoidin domain receptor tyrosine kinase 1	Region5	6	+	30852314	30852487	30850861	30850942	30856464	30856591	1.31e-30	3.17e-28	0.456,0.455,0.426,0.531,0.663,0.927,0.556,0.398,0.477,0.468	0.606,0.827,0.854,0.771,1.0,1.0,0.706,0.867,1.0,0.75	-0.302
18	3594239	3594539	+	1	0	ENSG00000177337	DLGAP1-AS1	NA	Region2	18	+	3594417	3594482	3594111	3594238	3596576	3598350	3.61e-05	0.00104221	0.833,0.757,0.63,0.62,0.699,0.491,0.813,0.763,0.801,0.795	0.873,1.0,1.0,0.657,0.578,NA,0.915,0.763,0.865,0.94	-0.123
18	3594118	3594418	+	1	0	ENSG00000177337	DLGAP1-AS1	NA	Region3	18	+	3594417	3594482	3594111	3594238	3596576	3598350	3.61e-05	0.00104221	0.833,0.757,0.63,0.62,0.699,0.491,0.813,0.763,0.801,0.795	0.873,1.0,1.0,0.657,0.578,NA,0.915,0.763,0.865,0.94	-0.123
18	3596277	3596577	+	0	1	ENSG00000177337	DLGAP1-AS1	NA	Region6	18	+	3594417	3594482	3594111	3594238	3596576	3598350	3.61e-05	0.00104221	0.833,0.757,0.63,0.62,0.699,0.491,0.813,0.763,0.801,0.795	0.873,1.0,1.0,0.657,0.578,NA,0.915,0.763,0.865,0.94	-0.123
19	35996668	35996968	-	0	1	ENSG00000161249	DMKN	dermokine	Region2	19	-	36000812	36000863	35996619	35996667	36001085	36001154	1.93e-05	0.000624692	0.722,0.778,0.745,0.745,0.956,0.862,0.848,0.875,0.833,0.877	0.61,0.786,0.633,0.942,0.822,0.08,0.768,0.969,0.646,0.779	0.121
19	36001086	36001236	-	1	1	ENSG00000161249	DMKN	dermokine	Region7	19	-	36000812	36000863	35996619	35996667	36001085	36001154	1.93e-05	0.000624692	0.722,0.778,0.745,0.745,0.956,0.862,0.848,0.875,0.833,0.877	0.61,0.786,0.633,0.942,0.822,0.08,0.768,0.969,0.646,0.779	0.121
15	51755576	51755726	-	0	1	ENSG00000104093	DMXL2	Dmx like 2	Region7	15	-	51751794	51751857	51750905	51750992	51755575	51755693	4.82e-07	2.19e-05	1.0,0.916,0.717,1.0,0.923,NA,0.8,0.766,0.932,1.0	0.766,0.902,0.649,0.483,0.766,NA,0.633,0.731,0.731,0.777	0.18
12	49741335	49741635	+	1	1	ENSG00000178401	DNAJC22	DnaJ heat shock protein family (Hsp40) member C22	Region2	12	+	49741426	49741888	49740699	49741334	49742548	49743495	0.00118978	0.0214509	0.778,0.609,0.551,0.692,0.5,0.619,0.551,0.385,0.457,0.521	1.0,1.0,0.579,0.75,0.5,NA,0.771,0.455,0.882,0.471	-0.146
12	49741127	49741427	+	0	1	ENSG00000178401	DNAJC22	DnaJ heat shock protein family (Hsp40) member C22	Region3	12	+	49741426	49741888	49740699	49741334	49742548	49743495	0.00118978	0.0214509	0.778,0.609,0.551,0.692,0.5,0.619,0.551,0.385,0.457,0.521	1.0,1.0,0.579,0.75,0.5,NA,0.771,0.455,0.882,0.471	-0.146
12	49741888	49742188	+	0	1	ENSG00000178401	DNAJC22	DnaJ heat shock protein family (Hsp40) member C22	Region5	12	+	49741426	49741888	49740699	49741334	49742548	49743495	0.00118978	0.0214509	0.778,0.609,0.551,0.692,0.5,0.619,0.551,0.385,0.457,0.521	1.0,1.0,0.579,0.75,0.5,NA,0.771,0.455,0.882,0.471	-0.146
19	11339674	11339974	-	0	1	ENSG00000130158	DOCK6	dedicator of cytokinesis 6	Region3	19	-	11339973	11340066	11339676	11339711	11342860	11342965	0.000227698	0.00493646	0.0,0.143,0.375,0.0,1.0,NA,0.316,0.071,0.172,0.29	0.143,0.12,0.059,0.13,0.043,0.0,0.167,0.018,0.111,0.103	0.174
19	11339974	11340066	-	1	0	ENSG00000130158	DOCK6	dedicator of cytokinesis 6	Region4	19	-	11339973	11340066	11339676	11339711	11342860	11342965	0.000227698	0.00493646	0.0,0.143,0.375,0.0,1.0,NA,0.316,0.071,0.172,0.29	0.143,0.12,0.059,0.13,0.043,0.0,0.167,0.018,0.111,0.103	0.174
19	11339917	11340067	-	1	0	ENSG00000130158	DOCK6	dedicator of cytokinesis 6	Region1	19	-	11342860	11342965	11339973	11340066	11343878	11344042	0.000229363	0.00496763	0.429,0.385,0.333,0.6,0.2,NA,0.357,0.2,0.733,0.313	0.733,0.8,0.524,0.571,0.778,NA,0.625,0.6,0.167,0.481	-0.192
19	11339712	11340012	-	0	1	ENSG00000130158	DOCK6	dedicator of cytokinesis 6	Region2	19	-	11342860	11342965	11339615	11339711	11343878	11344042	0.000106511	0.00247496	1.0,0.871,0.765,0.286,0.143,NA,0.742,0.882,0.742,0.447	0.909,0.864,0.826,1.0,0.529,1.0,0.833,1.0,1.0,0.929	-0.236
9	131848546	131848846	+	1	0	ENSG00000167130	DOLPP1	dolichyldiphosphatase 1	Region5	9	+	131848417	131848546	131847796	131847895	131848987	131849077	1.86e-05	0.000603033	0.728,0.778,0.825,0.857,0.843,1.0,0.944,0.881,0.875,0.886	0.691,0.83,0.753,0.765,0.929,0.492,0.824,0.714,0.813,0.789	0.102
9	131848688	131848988	+	1	0	ENSG00000167130	DOLPP1	dolichyldiphosphatase 1	Region6	9	+	131848417	131848546	131847796	131847895	131848987	131849077	1.86e-05	0.000603033	0.728,0.778,0.825,0.857,0.843,1.0,0.944,0.881,0.875,0.886	0.691,0.83,0.753,0.765,0.929,0.492,0.824,0.714,0.813,0.789	0.102
13	96258257	96258407	-	1	0	ENSG00000134874	DZIP1	DAZ interacting zinc finger protein 1	Region7	13	-	96251618	96251678	96246197	96246340	96258256	96258313	0.00116111	0.0209755	0.754,0.777,0.943,1.0,1.0,1.0,0.848,0.774,0.848,0.897	0.69,0.841,0.679,0.587,0.736,NA,0.654,0.426,0.86,1.0	0.165
chr11	85979454	85979604	+	0	1	ENSG00000074266	EED	embryonic ectoderm development	Region1	11	+	85981124	85981199	85979497	85979603	85988021	85988180	7.02e-10	4.68e-08	0.429,0.138,0.364,0.217,0.083,0.118,0.176,0.714,0.286,0.28	0.122,0.194,0.048,0.137,0.161,0.0,0.161,0.034,0.053,0.167	0.173
17	78396045	78396345	+	2	0	ENSG00000173818	ENDOV	endonuclease V	Region5	17	+	78395939	78396045	78389449	78389621	78397319	78397432	4.9e-11	3.7e-09	1.0,0.778,1.0,1.0,1.0,1.0,1.0,1.0,1.0,1.0	1.0,1.0,0.913,1.0,0.579,NA,0.68,0.84,0.5,0.75	0.171
17	78397020	78397320	+	2	1	ENSG00000173818	ENDOV	endonuclease V	Region6	17	+	78395939	78396045	78389449	78389621	78397319	78397432	4.9e-11	3.7e-09	1.0,0.778,1.0,1.0,1.0,1.0,1.0,1.0,1.0,1.0	1.0,1.0,0.913,1.0,0.579,NA,0.68,0.84,0.5,0.75	0.171
2	96068471	96068621	+	0	1	ENSG00000115042	FAHD2A	fumarylacetoacetate hydrolase domain containing 2A	Region1	2	+	96072688	96072905	96068470	96068620	96076274	96076334	0.000163978	0.00366132	1.0,1.0,1.0,0.81,1.0,0.0,1.0,1.0,0.636,0.583	1.0,1.0,0.721,1.0,1.0,1.0,1.0,1.0,0.935,0.771	-0.14
2	96068621	96068921	+	1	0	ENSG00000115042	FAHD2A	fumarylacetoacetate hydrolase domain containing 2A	Region2	2	+	96072688	96072905	96068470	96068620	96076274	96076334	0.000163978	0.00366132	1.0,1.0,1.0,0.81,1.0,0.0,1.0,1.0,0.636,0.583	1.0,1.0,0.721,1.0,1.0,1.0,1.0,1.0,0.935,0.771	-0.14
11	126081726	126082026	+	1	0	ENSG00000197798	FAM118B	family with sequence similarity 118 member B	Region2	11	+	126099119	126099231	126081671	126081725	126104889	126104982	0.00127102	0.0227326	0.806,0.8,0.875,0.579,0.889,1.0,0.786,0.786,0.889,0.935	0.591,0.478,0.857,0.417,0.44,NA,0.826,1.0,1.0,0.8	0.122
2	285990	286290	-	0	1	ENSG00000189292	FAM150B	family with sequence similarity 150 member B	Region6	2	-	286122	286203	283110	283175	286289	286343	0.00125327	0.0224474	1.0,0.897,1.0,1.0,0.811,0.814,0.836,0.909,0.824,0.913	1.0,0.829,1.0,0.892,0.92,0.407,0.652,1.0,0.565,0.706	0.103
8	21946810	21947110	+	0	1	ENSG00000158863	FAM160B2	family with sequence similarity 160 member B2	Region2	8	+	21947271	21947365	21946694	21946809	21951950	21952029	0.000150006	0.00337871	0.167,0.212,0.095,0.182,0.2,0.6,0.18,0.163,0.067,0.111	0.455,0.286,0.22,0.2,0.5,NA,0.133,0.561,0.364,0.225	-0.129
10	51859438	51859738	+	9	2	ENSG00000099290	FAM21A	family with sequence similarity 21 member A	Region3	10	+	51859737	51859824	51857434	51857562	51863801	51863903	3.62e-12	3.01e-10	0.846,NA,0.684,1.0,0.789,1.0,0.527,0.4,NA,0.717	1.0,NA,1.0,1.0,1.0,NA,0.619,1.0,NA,0.889	-0.184
10	51863802	51863952	+	0	1	ENSG00000099290	FAM21A	family with sequence similarity 21 member A	Region7	10	+	51859737	51859824	51857434	51857562	51863801	51863903	3.62e-12	3.01e-10	0.846,NA,0.684,1.0,0.789,1.0,0.527,0.4,NA,0.717	1.0,NA,1.0,1.0,1.0,NA,0.619,1.0,NA,0.889	-0.184
10	47943127	47943427	+	1	0	ENSG00000152726	FAM21B	family with sequence similarity 21 member A	Region5	10	+	47943064	47943127	47941961	47942084	47943487	47943700	1.36e-26	2.79e-24	NA,0.69,0.778,0.892,NA,0.846,NA,NA,0.959,NA	NA,0.886,1.0,1.0,NA,1.0,NA,NA,1.0,NA	-0.144
10	47943188	47943488	+	2	0	ENSG00000152726	FAM21B	family with sequence similarity 21 member A	Region6	10	+	47943064	47943127	47941961	47942084	47943487	47943700	1.36e-26	2.79e-24	NA,0.69,0.778,0.892,NA,0.846,NA,NA,0.959,NA	NA,0.886,1.0,1.0,NA,1.0,NA,NA,1.0,NA	-0.144
10	46272873	46273173	+	0	1	ENSG00000172661	FAM21C	family with sequence similarity 21 member C	Region5	10	+	46272720	46272873	46268703	46268806	46274400	46274583	0.00108424	0.0197477	0.286,0.6,0.158,0.182,0.235,NA,0.333,0.308,0.44,0.395	0.538,0.75,0.333,0.429,0.12,NA,0.586,0.515,0.474,0.388	-0.133
15	49898053	49898353	-	1	0	ENSG00000166262	FAM227B	family with sequence similarity 227 member B	Region3	15	-	49898352	49898415	49881970	49882204	49903411	49903465	2.08e-54	1.04e-51	0.154,0.592,0.352,0.112,0.352,1.0,0.246,0.326,0.303,0.237	0.154,0.083,0.545,0.0,0.14,1.0,0.0,0.108,0.0,0.094	0.155
10	120863710	120864010	+	1	0	ENSG00000119979	FAM45A	family with sequence similarity 45 member A	Region2	10	+	120864275	120864534	120863603	120863709	120867459	120867608	2.64e-06	0.000104976	0.371,0.5,0.412,0.486,0.396,0.5,0.2,0.419,0.51,0.269	0.532,0.66,0.333,0.585,0.68,1.0,0.475,0.391,0.672,0.5	-0.176
10	120863976	120864276	+	1	1	ENSG00000119979	FAM45A	family with sequence similarity 45 member A	Region3	10	+	120864275	120864534	120863603	120863709	120867459	120867608	2.64e-06	0.000104976	0.371,0.5,0.412,0.486,0.396,0.5,0.2,0.419,0.51,0.269	0.532,0.66,0.333,0.585,0.68,1.0,0.475,0.391,0.672,0.5	-0.176
8	130891635	130891717	-	1	0	ENSG00000153310	FAM49B	family with sequence similarity 49 member B	Region4	8	-	130891634	130891717	130883620	130883742	130915557	130915596	2.43e-07	1.15e-05	0.711,0.833,0.725,0.743,0.853,0.275,0.813,0.668,0.726,0.826	0.695,0.893,0.792,0.85,0.887,1.0,0.941,0.842,0.794,0.804	-0.132
10	127585225	127585525	+	0	1	ENSG00000203780	FANK1	fibronectin type III and ankyrin repeat domains 1	Region2	10	+	127668729	127668907	127585107	127585224	127677119	127677244	2.23e-07	1.06e-05	0.667,0.667,0.375,0.176,0.733,1.0,0.867,1.0,0.733,0.667	1.0,0.5,0.25,0.25,0.333,0.0,0.214,0.2,0.333,0.579	0.323
14	39900468	39900768	-	3	2	ENSG00000165355	FBXO33	F-box protein 33	Region6	14	-	39871604	39871715	39866872	39868991	39900767	39901704	0.000207849	0.00454317	0.891,0.739,0.905,0.8,0.778,NA,0.778,0.771,0.706,0.793	0.855,1.0,0.933,1.0,0.571,NA,0.9,1.0,1.0,0.849	-0.105
2	24276820	24277120	+	1	0	ENSG00000119782	FKBP1B	FK506 binding protein 1B	Region2	2	+	24276973	24277062	24276771	24276819	24277342	24277410	2.51e-05	0.00076467	1.0,0.625,0.857,0.636,0.579,1.0,1.0,1.0,0.789,0.926	0.818,0.308,0.739,0.867,0.68,1.0,0.619,0.84,0.556,0.692	0.129
2	24276674	24276974	+	1	0	ENSG00000119782	FKBP1B	FK506 binding protein 1B	Region3	2	+	24276973	24277062	24276771	24276819	24277342	24277410	2.51e-05	0.00076467	1.0,0.625,0.857,0.636,0.579,1.0,1.0,1.0,0.789,0.926	0.818,0.308,0.739,0.867,0.68,1.0,0.619,0.84,0.556,0.692	0.129
1	173833842	173834142	-	1	0	ENSG00000234741	GAS5	growth arrest specific 5 (non-protein coding)	Region5	1	-	173833812	173833842	173833394	173833442	173834608	173834685	6.77e-11	5.03e-09	0.254,1.0,0.418,0.463,0.264,0.0,0.742,NA,0.896,0.418	0.242,1.0,0.642,0.878,0.418,1.0,0.668,0.896,0.91,0.92	-0.262
19	19575849	19576149	+	1	0	ENSG00000167491	GATAD2A	GATA zinc finger domain containing 2A	Region6	19	+	19546939	19547028	19516646	19516828	19576148	19576386	1.16e-12	9.97e-11	0.103,0.63,0.268,0.568,0.171,0.241,0.434,0.316,0.372,0.333	0.045,0.288,0.2,0.148,0.122,0.0,0.087,0.169,0.163,0.256	0.196
22	25003991	25004291	+	1	0	ENSG00000100031	GGT1	gamma-glutamyltransferase 1	Region2	22	+	25005931	25006000	25003920	25003990	25006324	25006498	1.41e-06	5.91e-05	1.0,0.718,0.61,0.475,0.373,1.0,0.676,0.741,0.758,0.525	0.701,0.61,0.865,0.845,0.879,NA,0.878,0.914,0.878,0.844	-0.136
22	25003991	25004291	+	1	0	ENSG00000100031	GGT1	gamma-glutamyltransferase 1	Region2	22	+	25005928	25006000	25003920	25003990	25006324	25006498	5.06e-05	0.00136617	1.0,0.548,0.561,0.254,0.226,1.0,0.338,0.605,0.664,0.453	0.434,0.405,0.754,0.739,0.761,1.0,0.781,0.849,0.824,0.739	-0.164
22	24629166	24629466	-	3	1	ENSG00000099998	GGT5	gamma-glutamyltransferase 5	Region3	22	-	24629465	24629561	24628790	24628986	24629841	24629972	0.00029494	0.00621088	0.889,0.844,0.789,1.0,0.773,0.111,0.765,0.563,0.699,0.8	0.9,0.887,1.0,0.778,0.758,NA,1.0,1.0,1.0,0.714	-0.17
16	58426692	58426992	+	0	1	ENSG00000181938	GINS3	GINS complex subunit 3	Region2	16	+	58437001	58437235	58426297	58426691	58438402	58439385	3.13e-05	0.000914484	1.0,0.6,0.7,0.379,0.5,0.667,0.412,0.647,0.73,0.565	0.882,1.0,1.0,0.882,0.727,NA,0.778,0.6,1.0,0.533	-0.202
X	30718531	30718681	+	1	0	ENSG00000198814	GK	glycerol kinase	Region7	X	+	30715848	30715866	30714733	30714800	30718530	30718566	1.19e-06	5.06e-05	0.454,0.134,0.352,0.155,0.208,0.6,0.31,0.321,0.189,0.369	0.479,0.337,0.543,0.363,0.779,NA,0.348,0.697,0.219,0.262	-0.138
4	176923160	176923460	-	4	1	ENSG00000150625	GPM6A	glycoprotein M6A	Region6	4	-	176733341	176733400	176622725	176622918	176923459	176923483	1.14e-09	7.38e-08	0.409,0.274,0.342,0.435,0.504,0.079,0.258,0.3,0.21,0.249	0.579,0.344,0.401,0.457,0.777,0.662,0.499,0.359,0.737,0.385	-0.214
X	101906315	101906615	+	0	1	ENSG00000198932	GPRASP1	G protein-coupled receptor associated sorting protein 1	Region3	X	+	101906614	101906661	101906328	101906523	101908148	101908226	0.00296586	0.0475725	0.31,0.093,0.576,0.507,0.683,NA,0.531,0.673,0.633,0.33	0.194,0.418,0.407,0.435,0.381,NA,0.667,0.463,0.0,0.316	0.117
1	210560776	210560926	+	2	0	ENSG00000054392	HHAT	hedgehog acyltransferase	Region1	1	+	210573811	210574006	210560811	210560925	210577807	210578023	1.75e-13	1.63e-11	0.939,0.765,1.0,0.75,0.538,0.778,0.514,0.806,0.733,0.875	1.0,1.0,0.6,1.0,1.0,NA,1.0,1.0,0.667,1.0	-0.149
1	42501178	42501478	-	0	2	ENSG00000127124	HIVEP3	human immunodeficiency virus type I enhancer binding protein 3	Region6	1	-	42384083	42384195	42314541	42314760	42501477	42501596	0.00140515	0.024905	0.6,1.0,0.8,0.889,1.0,0.655,0.889,0.647,0.619,0.846	0.5,0.375,1.0,0.5,0.75,NA,0.538,1.0,0.487,0.818	0.131
6	32903013	32903313	-	0	1	ENSG00000242574	HLA-DMB	major histocompatibility complex, class II, DM beta	Region6	6	-	32903118	32903154	32902405	32902764	32903312	32903429	1.8e-18	2.48e-16	0.475,0.281,0.477,0.301,0.339,0.498,0.264,0.639,0.489,0.373	0.449,0.312,0.849,0.772,0.856,0.426,0.898,0.712,0.729,0.898	-0.276
7	26230748	26231048	-	1	1	ENSG00000122566	HNRNPA2B1	heterogeneous nuclear ribonucleoprotein A2/B1	Region5	7	-	26230612	26230748	26229744	26230080	26232114	26232197	8.48e-216	3.09e-212	0.75,0.584,0.667,0.459,0.412,0.468,0.429,0.507,0.588,0.487	0.783,0.659,0.705,0.569,0.599,0.599,0.652,0.606,0.679,0.568	-0.107
3	50358497	50358797	-	3	1	ENSG00000068001	HYAL2	hyaluronoglucosaminidase 2	Region3	3	-	50358796	50359204	50356999	50357966	50360083	50360208	4.1e-43	1.55e-40	0.462,0.324,0.913,0.778,0.939,0.8,0.832,0.742,0.529,0.714	0.154,0.344,0.592,0.606,0.558,NA,0.478,0.4,0.382,0.533	0.254
3	50359204	50359504	-	6	1	ENSG00000068001	HYAL2	hyaluronoglucosaminidase 2	Region5	3	-	50358796	50359204	50356999	50357966	50360083	50360208	4.1e-43	1.55e-40	0.462,0.324,0.913,0.778,0.939,0.8,0.832,0.742,0.529,0.714	0.154,0.344,0.592,0.606,0.558,NA,0.478,0.4,0.382,0.533	0.254
6	82956979	82957279	-	0	1	ENSG00000005700	IBTK	inhibitor of Bruton tyrosine kinase	Region6	6	-	82949882	82950560	82943875	82943972	82957278	82957388	4.47e-64	2.98e-61	0.75,0.952,0.955,0.875,0.944,0.0,0.818,0.975,0.972,0.861	0.889,1.0,0.986,1.0,1.0,NA,0.833,1.0,1.0,1.0	-0.157
1	207073703	207074003	+	1	0	ENSG00000162892	IL24	interleukin 24	Region2	1	+	207074838	207074997	207073639	207073702	207075342	207075417	2.83e-05	0.00084529	0.929,0.932,0.867,0.813,0.869,1.0,0.91,0.816,0.847,0.822	0.951,0.733,1.0,0.765,0.767,NA,1.0,0.0,1.0,0.722	0.11
1	207075343	207075493	+	0	1	ENSG00000162892	IL24	interleukin 24	Region7	1	+	207074838	207074997	207073639	207073702	207075342	207075417	2.83e-05	0.00084529	0.929,0.932,0.867,0.813,0.869,1.0,0.91,0.816,0.847,0.822	0.951,0.733,1.0,0.765,0.767,NA,1.0,0.0,1.0,0.722	0.11
16	732875	733175	-	1	0	ENSG00000161999	JMJD8	jumonji domain containing 8	Region2	16	-	732957	733087	731698	732874	733321	733598	0.00172459	0.0298018	0.529,1.0,0.8,0.273,0.846,0.2,0.818,0.857,0.778,0.92	0.556,1.0,1.0,0.818,0.8,NA,1.0,1.0,0.769,0.829	-0.161
16	732658	732958	-	2	0	ENSG00000161999	JMJD8	jumonji domain containing 8	Region3	16	-	732957	733087	731698	732874	733321	733598	0.00172459	0.0298018	0.529,1.0,0.8,0.273,0.846,0.2,0.818,0.857,0.778,0.92	0.556,1.0,1.0,0.818,0.8,NA,1.0,1.0,0.769,0.829	-0.161
16	733087	733387	-	2	1	ENSG00000161999	JMJD8	jumonji domain containing 8	Region5	16	-	732957	733087	731698	732874	733321	733598	0.00172459	0.0298018	0.529,1.0,0.8,0.273,0.846,0.2,0.818,0.857,0.778,0.92	0.556,1.0,1.0,0.818,0.8,NA,1.0,1.0,0.769,0.829	-0.161
X	44919252	44919402	+	1	0	ENSG00000147050	KDM6A	lysine demethylase 6A	Region1	X	+	44919853	44920009	44919301	44919401	44920568	44920664	0.00268308	0.0436375	0.538,0.3,0.636,0.429,0.385,0.0,0.378,0.253,0.438,0.692	0.789,0.286,0.714,0.385,NA,NA,0.867,0.571,0.667,0.316	-0.169
8	126103557	126103857	-	1	0	ENSG00000164961	KIAA0196	KIAA0196	Region6	8	-	126095954	126096018	126095354	126095500	126103856	126104061	1.06e-10	7.69e-09	1.0,0.503,0.549,0.709,1.0,1.0,0.384,0.716,0.883,0.748	1.0,0.875,0.764,1.0,1.0,NA,0.866,1.0,1.0,0.778	-0.171
8	126103557	126103857	-	1	0	ENSG00000164961	KIAA0196	KIAA0196	Region6	8	-	126096076	126096264	126095354	126095500	126103856	126104032	7.42e-10	4.92e-08	1.0,0.59,0.543,0.556,1.0,NA,0.469,0.813,0.846,0.795	1.0,0.846,0.739,1.0,1.0,NA,0.789,1.0,1.0,0.814	-0.175
8	126103557	126103857	-	1	0	ENSG00000164961	KIAA0196	KIAA0196	Region6	8	-	126095954	126096264	126095354	126095500	126103856	126104082	5.96e-11	4.45e-09	1.0,0.714,0.686,0.778,1.0,1.0,0.587,0.872,0.929,0.867	1.0,0.913,0.85,1.0,1.0,NA,0.909,1.0,1.0,0.875	-0.106
16	27710920	27711220	+	0	1	ENSG00000047578	KIAA0556	KIAA0556	Region5	16	+	27710854	27710920	27709648	27709821	27712909	27713016	3.2e-09	1.95e-07	1.0,0.745,0.727,1.0,1.0,NA,0.835,0.727,1.0,0.706	1.0,1.0,1.0,1.0,1.0,NA,1.0,1.0,1.0,0.933	-0.133
7	36396511	36397199	-	1	0	ENSG00000164542	KIAA0895	KIAA0895	Region4	7	-	36396510	36397199	36375762	36375906	36406719	36406878	9.7e-05	0.00227395	0.771,0.714,0.786,1.0,0.556,NA,1.0,0.5,0.867,0.5	0.783,1.0,1.0,1.0,1.0,NA,0.789,0.895,1.0,0.846	-0.18
7	36406420	36406720	-	3	2	ENSG00000164542	KIAA0895	KIAA0895	Region6	7	-	36396510	36397199	36375762	36375906	36406719	36406878	9.7e-05	0.00227395	0.771,0.714,0.786,1.0,0.556,NA,1.0,0.5,0.867,0.5	0.783,1.0,1.0,1.0,1.0,NA,0.789,0.895,1.0,0.846	-0.18
10	3823533	3823833	-	3	0	ENSG00000067082	KLF6	Kruppel like factor 6	Region6	10	-	3822297	3822421	3818187	3821782	3823832	3824406	0.0013499	0.024001	0.992,0.955,0.938,0.85,0.971,1.0,0.895,0.942,0.929,0.903	0.962,0.95,0.86,0.887,0.859,0.02,0.934,1.0,0.982,0.881	0.104
16	1717036	1717336	+	0	1	ENSG00000261732	LA16c-431H6.6	NA	Region3	16	+	1717335	1717401	1716422	1716601	1717962	1718185	0.000282008	0.00596732	0.81,0.889,0.865,NA,0.615,1.0,0.644,0.788,0.74,0.64	0.655,1.0,0.865,1.0,0.615,NA,1.0,0.948,1.0,0.948	-0.116
16	1717663	1717963	+	1	0	ENSG00000261732	LA16c-431H6.6	NA	Region6	16	+	1717335	1717401	1716422	1716601	1717962	1718185	0.000282008	0.00596732	0.81,0.889,0.865,NA,0.615,1.0,0.644,0.788,0.74,0.64	0.655,1.0,0.865,1.0,0.615,NA,1.0,0.948,1.0,0.948	-0.116
16	1717963	1718113	+	1	0	ENSG00000261732	LA16c-431H6.6	NA	Region7	16	+	1717335	1717401	1716422	1716601	1717962	1718185	0.000282008	0.00596732	0.81,0.889,0.865,NA,0.615,1.0,0.644,0.788,0.74,0.64	0.655,1.0,0.865,1.0,0.615,NA,1.0,0.948,1.0,0.948	-0.116
9	132267322	132267622	+	5	1	ENSG00000204054	LINC00963	NA	Region5	9	+	132267170	132267322	132265601	132265951	132275697	132275796	5.52e-32	1.41e-29	0.701,0.81,0.902,0.765,1.0,1.0,0.909,0.333,1.0,0.85	0.898,0.882,1.0,1.0,0.789,NA,1.0,1.0,1.0,1.0	-0.125
2	99771645	99771945	+	1	0	ENSG00000144182	LIPT1	lipoyltransferase 1	Region3	2	+	99771944	99772007	99771417	99771514	99772763	99772889	4.34e-07	1.98e-05	0.541,0.214,0.173,0.098,0.203,0.237,0.201,0.282,0.412,0.266	0.138,0.12,0.052,0.129,0.179,NA,0.182,0.135,0.147,0.0	0.142
chr2	11913722	11913872	+	1	0	ENSG00000134324	LPIN1	lipin 1	Region1	2	+	11916211	11916319	11913745	11913871	11919644	11919771	7.53e-09	4.35e-07	0.141,0.219,0.257,0.529,0.25,0.0,0.346,0.317,0.398,0.198	0.087,0.083,0.128,0.13,0.059,NA,0.267,0.134,0.067,0.245	0.132
11	71791932	71792232	+	1	0	ENSG00000184154	LRTOMT	leucine rich transmembrane and O-methyltransferase domain containing	Region2	11	+	71799342	71799426	71791904	71791931	71804541	71804747	1.94e-19	2.83e-17	0.333,0.636,0.688,0.538,0.673,1.0,0.889,0.714,0.8,0.771	0.317,0.556,0.68,0.429,0.571,NA,0.667,0.692,0.4,0.581	0.161
11	71804242	71804542	+	1	1	ENSG00000184154	LRTOMT	leucine rich transmembrane and O-methyltransferase domain containing	Region6	11	+	71799342	71799426	71791904	71791931	71804541	71804747	1.94e-19	2.83e-17	0.333,0.636,0.688,0.538,0.673,1.0,0.889,0.714,0.8,0.771	0.317,0.556,0.68,0.429,0.571,NA,0.667,0.692,0.4,0.581	0.161
19	41120353	41120653	+	2	0	ENSG00000090006	LTBP4	latent transforming growth factor beta binding protein 4	Region2	19	+	41123005	41123130	41120220	41120352	41125251	41125398	8.75e-05	0.00207544	0.111,0.465,0.224,0.259,0.222,0.263,0.288,0.25,0.344,0.257	0.181,0.444,0.283,0.2,0.2,1.0,0.514,0.288,0.625,0.207	-0.126
22	50695076	50695376	-	1	0	ENSG00000188130	MAPK12	mitogen-activated protein kinase 12	Region2	22	-	50695216	50695393	50695027	50695075	50695510	50695622	0.000343203	0.00706415	0.529,1.0,0.643,0.684,0.674,1.0,0.643,0.818,0.455,0.923	1.0,0.677,0.895,1.0,0.742,1.0,0.756,0.957,0.938,0.714	-0.131
22	50695393	50695693	-	0	1	ENSG00000188130	MAPK12	mitogen-activated protein kinase 12	Region5	22	-	50695216	50695393	50695027	50695075	50695510	50695622	0.000343203	0.00706415	0.529,1.0,0.643,0.684,0.674,1.0,0.643,0.818,0.455,0.923	1.0,0.677,0.895,1.0,0.742,1.0,0.756,0.957,0.938,0.714	-0.131
22	50695211	50695511	-	2	1	ENSG00000188130	MAPK12	mitogen-activated protein kinase 12	Region6	22	-	50695216	50695393	50695027	50695075	50695510	50695622	0.000343203	0.00706415	0.529,1.0,0.643,0.684,0.674,1.0,0.643,0.818,0.455,0.923	1.0,0.677,0.895,1.0,0.742,1.0,0.756,0.957,0.938,0.714	-0.131
17	74722752	74723052	+	7	0	ENSG00000181038	METTL23	methyltransferase like 23	Region3	17	+	74723051	74723295	74722924	74722961	74725771	74725876	6.39e-17	7.82e-15	0.137,0.364,0.543,0.739,0.185,1.0,0.357,0.52,0.677,0.632	0.151,0.318,0.282,0.561,0.255,1.0,0.391,0.317,0.515,0.367	0.1
19	2039855	2040155	-	1	1	ENSG00000099875	MKNK2	MAP kinase interacting serine/threonine kinase 2	Region5	19	-	2039629	2039855	2037630	2037828	2040132	2040176	1.46e-91	1.66e-88	0.134,0.499,0.319,0.177,0.433,0.167,0.445,0.504,0.437,0.381	0.137,0.301,0.134,0.184,0.321,0.012,0.249,0.242,0.152,0.257	0.151
19	2039833	2040133	-	1	1	ENSG00000099875	MKNK2	MAP kinase interacting serine/threonine kinase 2	Region6	19	-	2039629	2039855	2037630	2037828	2040132	2040176	1.46e-91	1.66e-88	0.134,0.499,0.319,0.177,0.433,0.167,0.445,0.504,0.437,0.381	0.137,0.301,0.134,0.184,0.321,0.012,0.249,0.242,0.152,0.257	0.151
17	56285255	56285405	-	1	0	ENSG00000011143	MKS1	Meckel syndrome, type 1	Region7	17	-	56284445	56284579	56283643	56283741	56285254	56285362	5.39e-10	3.65e-08	1.0,0.867,1.0,1.0,1.0,1.0,1.0,1.0,1.0,1.0	0.833,0.905,1.0,1.0,1.0,0.105,1.0,0.833,1.0,0.895	0.13
17	56285255	56285405	-	1	0	ENSG00000011143	MKS1	Meckel syndrome, type 1	Region7	17	-	56283825	56283908	56283643	56283741	56285254	56285362	3.65e-11	2.79e-09	1.0,0.846,1.0,1.0,1.0,1.0,1.0,1.0,1.0,1.0	0.846,0.909,1.0,1.0,1.0,0.0,1.0,0.733,1.0,0.862	0.15
10	102743575	102743875	-	1	0	ENSG00000055950	MRPL43	mitochondrial ribosomal protein L43	Region2	10	-	102743704	102743831	102743511	102743574	102746846	102747027	0.00131148	0.0233989	0.524,0.81,0.946,0.88,0.95,1.0,0.68,0.833,0.333,0.919	0.81,1.0,0.941,0.967,1.0,1.0,0.6,0.813,1.0,0.918	-0.117
10	102743405	102743705	-	2	0	ENSG00000055950	MRPL43	mitochondrial ribosomal protein L43	Region3	10	-	102743704	102743831	102743511	102743574	102746846	102747027	0.00131148	0.0233989	0.524,0.81,0.946,0.88,0.95,1.0,0.68,0.833,0.333,0.919	0.81,1.0,0.941,0.967,1.0,1.0,0.6,0.813,1.0,0.918	-0.117
10	102746547	102746847	-	0	1	ENSG00000055950	MRPL43	mitochondrial ribosomal protein L43	Region6	10	-	102743704	102743831	102743511	102743574	102746846	102747027	0.00131148	0.0233989	0.524,0.81,0.946,0.88,0.95,1.0,0.68,0.833,0.333,0.919	0.81,1.0,0.941,0.967,1.0,1.0,0.6,0.813,1.0,0.918	-0.117
9	125027741	125028059	+	0	1	ENSG00000148187	MRRF	mitochondrial ribosome recycling factor	Region4	9	+	125027740	125028059	125027165	125027217	125033142	125033354	2.82e-06	0.000111345	0.042,0.05,0.094,0.167,0.07,0.714,0.07,0.129,0.07,0.128	0.056,0.105,0.0,0.024,0.105,0.0,0.02,0.021,0.091,0.053	0.106
3	123365771	123366071	-	0	1	ENSG00000065534	MYLK	myosin light chain kinase	Region3	3	-	123366070	123366274	123359133	123359351	123367817	123367911	3.01e-05	0.000887189	0.538,0.638,0.882,0.579,0.7,NA,0.81,0.831,0.959,0.855	0.92,0.852,0.714,1.0,0.864,NA,0.89,1.0,0.697,0.911	-0.117
15	52632592	52632892	-	1	0	ENSG00000197535	MYO5A	myosin VA	Region2	15	-	52635313	52635394	52632392	52632591	52638557	52638658	0.000112617	0.00259957	0.098,0.36,0.286,0.189,0.038,NA,0.316,0.132,0.178,0.108	0.16,0.0,0.158,0.12,0.1,0.0,0.077,0.0,0.027,0.069	0.118
6	76608128	76608428	+	1	0	ENSG00000196586	MYO6	myosin VI	Region5	6	+	76608089	76608128	76602246	76602407	76617321	76617425	7.6e-59	4.34e-56	0.104,0.293,0.524,0.294,0.433,0.0,0.463,0.163,0.449,0.412	0.087,0.274,0.301,0.2,0.335,0.0,0.185,0.142,0.326,0.243	0.104
19	17291849	17292149	+	2	1	ENSG00000099331	MYO9B	myosin IXB	Region5	19	+	17291735	17291849	17286471	17286550	17294637	17294677	5.37e-05	0.00144364	0.852,1.0,1.0,0.789,0.667,0.333,0.88,0.902,1.0,0.93	1.0,0.846,1.0,1.0,1.0,NA,0.926,1.0,1.0,1.0	-0.139
19	17294638	17294788	+	1	0	ENSG00000099331	MYO9B	myosin IXB	Region7	19	+	17291735	17291849	17286471	17286550	17294637	17294677	5.37e-05	0.00144364	0.852,1.0,1.0,0.789,0.667,0.333,0.88,0.902,1.0,0.93	1.0,0.846,1.0,1.0,1.0,NA,0.926,1.0,1.0,1.0	-0.139
11	113102067	113102367	+	4	1	ENSG00000149294	NCAM1	neural cell adhesion molecule 1	Region6	11	+	113092017	113092047	113085090	113085233	113102366	113102517	0.000832459	0.015581	0.309,0.243,0.193,0.299,0.331,0.659,0.452,0.256,0.231,0.352	0.33,0.453,0.271,0.452,0.692,1.0,0.434,0.336,0.59,0.391	-0.162
19	3456248	3456548	+	1	1	ENSG00000141905	NFIC	nuclear factor I C	Region3	19	+	3456547	3456633	3452479	3452664	3462749	3463140	0.00166266	0.0288571	0.545,0.637,0.807,0.733,0.696,0.908,0.701,0.72,0.639,0.67	0.541,0.665,0.678,0.438,0.739,0.087,0.642,0.664,0.62,0.751	0.123
16	67204478	67204778	+	0	2	ENSG00000140939	NOL3	nucleolar protein 3	Region2	16	+	67207910	67207949	67204399	67204477	67208064	67208367	5.34e-19	7.65e-17	0.222,0.69,0.569,0.831,0.381,0.74,0.312,0.391,0.709,0.51	0.398,0.808,0.572,0.773,0.465,1.0,0.625,0.652,0.618,0.639	-0.12
16	67204478	67204778	+	0	2	ENSG00000140939	NOL3	nucleolar protein 3	Region2	16	+	67207764	67207949	67204404	67204477	67208064	67208367	6.2e-24	1.11e-21	0.279,0.741,0.669,0.86,0.485,0.775,0.389,0.481,0.766,0.593	0.452,0.854,0.656,0.84,0.58,1.0,0.665,0.754,0.676,0.698	-0.114
16	67207949	67208249	+	1	0	ENSG00000140939	NOL3	nucleolar protein 3	Region5	16	+	67207910	67207949	67204399	67204477	67208064	67208367	5.34e-19	7.65e-17	0.222,0.69,0.569,0.831,0.381,0.74,0.312,0.391,0.709,0.51	0.398,0.808,0.572,0.773,0.465,1.0,0.625,0.652,0.618,0.639	-0.12
16	67207949	67208249	+	1	0	ENSG00000140939	NOL3	nucleolar protein 3	Region5	16	+	67207764	67207949	67204404	67204477	67208064	67208367	6.2e-24	1.11e-21	0.279,0.741,0.669,0.86,0.485,0.775,0.389,0.481,0.766,0.593	0.452,0.854,0.656,0.84,0.58,1.0,0.665,0.754,0.676,0.698	-0.114
11	47282798	47283098	+	1	0	ENSG00000025434	NR1H3	nuclear receptor subfamily 1 group H member 3	Region3	11	+	47283097	47283277	47282791	47283000	47283469	47283569	8.33e-15	8.65e-13	1.0,0.933,0.829,1.0,0.909,1.0,0.887,0.867,0.947,1.0	0.892,0.704,0.556,0.818,0.84,0.276,0.964,1.0,0.619,0.905	0.18
14	90768147	90768447	-	0	1	ENSG00000119720	NRDE2	NRDE-2, necessary for RNA interference, domain containing	Region5	14	-	90768117	90768147	90767582	90767716	90769063	90769181	0.000110036	0.00254739	0.0,0.193,0.185,0.087,0.0,1.0,0.093,0.087,0.0,0.0	0.049,0.0,0.0,0.0,0.0,NA,0.082,0.0,0.0,0.061	0.143
22	50609386	50609686	+	1	1	ENSG00000073150	PANX2	pannexin 2	Region2	22	+	50613860	50613911	50609189	50609385	50615367	50616831	0.000200112	0.0043929	0.705,0.299,0.069,0.437,0.721,NA,0.472,0.309,0.544,0.166	0.905,0.544,0.66,0.766,0.642,1.0,1.0,0.394,0.452,0.422	-0.265
22	50613561	50613861	+	2	0	ENSG00000073150	PANX2	pannexin 2	Region3	22	+	50613860	50613911	50609189	50609385	50615367	50616831	0.000200112	0.0043929	0.705,0.299,0.069,0.437,0.721,NA,0.472,0.309,0.544,0.166	0.905,0.544,0.66,0.766,0.642,1.0,1.0,0.394,0.452,0.422	-0.265
22	50615068	50615368	+	1	1	ENSG00000073150	PANX2	pannexin 2	Region6	22	+	50613860	50613911	50609189	50609385	50615367	50616831	0.000200112	0.0043929	0.705,0.299,0.069,0.437,0.721,NA,0.472,0.309,0.544,0.166	0.905,0.544,0.66,0.766,0.642,1.0,1.0,0.394,0.452,0.422	-0.265
10	89487041	89487191	+	1	0	ENSG00000198682	PAPSS2	3'-phosphoadenosine 5'-phosphosulfate synthase 2	Region7	10	+	89481512	89481527	89475488	89475600	89487040	89487246	4.71e-37	1.41e-34	0.237,0.57,0.578,0.39,0.502,0.771,0.649,0.609,0.57,0.523	0.187,0.558,0.498,0.352,0.459,0.08,0.554,0.478,0.533,0.471	0.123
2	70282488	70282788	-	3	1	ENSG00000179818	PCBP1-AS1	PCBP1 antisense RNA 1	Region3	2	-	70282787	70283042	70278334	70278437	70286774	70286812	0.000411164	0.00829831	0.103,0.143,0.429,0.19,0.429,0.5,0.2,0.111,0.368,0.333	0.25,0.067,0.471,0.421,0.692,1.0,0.349,0.313,0.429,0.5	-0.169
20	2820579	2820879	-	1	0	ENSG00000132635	PCED1A	PC-esterase domain containing 1A	Region5	20	-	2820434	2820579	2819837	2819917	2821511	2821836	1.01e-05	0.000349872	1.0,0.92,1.0,0.826,1.0,0.407,0.942,1.0,0.909,0.95	1.0,1.0,1.0,1.0,1.0,1.0,1.0,0.964,1.0,1.0	-0.101
20	2821212	2821512	-	1	0	ENSG00000132635	PCED1A	PC-esterase domain containing 1A	Region6	20	-	2820434	2820579	2819837	2819917	2821511	2821836	1.01e-05	0.000349872	1.0,0.92,1.0,0.826,1.0,0.407,0.942,1.0,0.909,0.95	1.0,1.0,1.0,1.0,1.0,1.0,1.0,0.964,1.0,1.0	-0.101
21	47863423	47863723	+	2	0	ENSG00000160299	PCNT	pericentrin	Region3	21	+	47863722	47863861	47862409	47862486	47865196	47865682	5.91e-13	5.24e-11	0.538,0.686,0.688,0.71,0.667,0.152,0.455,0.556,0.556,0.493	0.8,0.775,0.683,0.742,0.674,0.975,0.705,0.915,0.459,0.711	-0.194
1	144853865	144854165	-	1	0	ENSG00000178104	PDE4DIP	phosphodiesterase 4D interacting protein	Region3	1	-	144854164	144854211	144851426	144852443	144854517	144854656	4.21e-10	2.87e-08	0.872,1.0,0.919,0.908,1.0,1.0,0.976,0.816,1.0,0.976	0.908,0.896,0.913,0.764,0.947,0.418,0.858,0.95,0.889,0.898	0.103
16	47495338	47495638	+	2	0	ENSG00000102893	PHKB	phosphorylase kinase regulatory subunit beta	Region2	16	+	47497809	47497904	47495033	47495337	47531309	47531399	7.72e-07	3.38e-05	0.892,1.0,0.778,1.0,0.6,1.0,0.826,0.857,0.857,0.95	0.892,1.0,0.946,1.0,1.0,1.0,1.0,0.958,1.0,1.0	-0.104
22	38464740	38465040	+	1	0	ENSG00000100151	PICK1	protein interacting with PRKCA 1	Region6	22	+	38463710	38463777	38461008	38461137	38465039	38465129	3.77e-10	2.59e-08	1.0,1.0,0.983,1.0,0.989,1.0,0.989,1.0,1.0,1.0	1.0,1.0,1.0,1.0,0.964,0.0,0.986,1.0,0.961,1.0	0.105
7	108161920	108161965	-	1	0	ENSG00000135241	PNPLA8	patatin like phospholipase domain containing 8	Region4	7	-	108161919	108161965	108154879	108156018	108166472	108166638	4.27e-14	4.15e-12	0.404,0.682,0.677,0.864,0.504,0.944,0.964,0.769,0.708,0.541	0.345,0.633,0.543,0.574,0.528,NA,0.672,0.757,0.516,0.589	0.133
7	108166173	108166473	-	0	1	ENSG00000135241	PNPLA8	patatin like phospholipase domain containing 8	Region6	7	-	108161919	108161965	108154879	108156018	108166472	108166638	4.27e-14	4.15e-12	0.404,0.682,0.677,0.864,0.504,0.944,0.964,0.769,0.708,0.541	0.345,0.633,0.543,0.574,0.528,NA,0.672,0.757,0.516,0.589	0.133
chr22	22024102	22024252	+	0	1	ENSG00000100023	PPIL2	peptidylprolyl isomerase like 2	Region1	22	+	22024587	22024649	22024201	22024251	22024854	22024900	1.06e-06	4.53e-05	0.281,0.228,0.354,0.0,0.204,NA,0.055,0.039,0.062,0.066	0.057,0.031,0.035,0.052,0.0,NA,0.128,0.0,0.0,0.038	0.105
14	102276374	102276674	+	0	1	ENSG00000078304	PPP2R5C	protein phosphatase 2 regulatory subunit B'gamma	Region2	14	+	102298037	102298141	102276205	102276373	102302505	102302910	0.00114067	0.0206678	0.39,0.2,0.13,0.0,0.161,0.125,0.0,0.053,0.105,0.029	0.388,0.156,0.163,0.083,0.106,1.0,0.12,0.014,0.517,0.304	-0.166
9	112216776	112216854	-	1	0	ENSG00000070159	PTPN3	protein tyrosine phosphatase, non-receptor type 3	Region4	9	-	112216775	112216854	112211090	112211135	112219452	112219495	2.63e-05	0.000796538	0.876,0.775,0.726,0.826,0.724,1.0,0.957,0.896,0.851,0.691	0.846,0.517,0.651,0.704,1.0,0.0,0.689,0.577,0.571,0.623	0.214
2	1691104	1691404	-	1	0	ENSG00000130508	PXDN	peroxidasin	Region3	2	-	1691403	1691475	1687851	1687923	1695699	1695771	0.00048308	0.00961428	0.671,0.833,1.0,NA,NA,NA,0.754,0.76,0.915,0.884	0.597,0.689,1.0,1.0,0.505,1.0,0.771,0.634,0.389,0.525	0.12
2	238494641	238494791	-	0	1	ENSG00000124839	RAB17	RAB17, member RAS oncogene family	Region7	2	-	238486646	238486798	238485899	238486025	238494640	238494800	3.3e-180	9e-177	0.88,0.845,0.904,0.89,0.868,0.983,0.883,0.896,0.861,0.856	0.861,0.919,0.698,0.86,0.922,0.256,0.83,0.669,0.785,0.835	0.123
1	174846230	174846530	+	1	0	ENSG00000152061	RABGAP1L	RAB GTPase activating protein 1 like	Region3	1	+	174846529	174846743	174780969	174781098	174926593	174926686	1.86e-41	6.58e-39	0.241,0.562,0.448,0.369,0.736,0.551,0.649,0.574,0.464,0.591	0.19,0.161,0.206,0.242,0.344,0.036,0.357,0.132,0.348,0.328	0.284
17	33434141	33434441	-	2	1	ENSG00000267618	RAD51L3-RFFL	NA	Region5	17	-	33434006	33434141	33433404	33433500	33446129	33446191	0.00218636	0.0366505	0.583,0.455,0.458,0.375,0.484,0.714,0.579,0.353,0.548,0.571	0.583,0.105,0.39,0.5,0.313,0.059,0.298,0.459,0.348,0.433	0.163
5	34812164	34812314	+	1	0	ENSG00000039560	RAI14	retinoic acid induced 14	Region1	5	+	34813678	34813765	34812284	34812313	34814687	34814774	8.9e-30	2.08e-27	0.862,0.253,0.6,0.91,0.758,1.0,0.543,0.537,0.511,0.515	0.954,0.535,0.889,0.907,0.862,NA,0.714,0.429,0.895,0.787	-0.126
9	134525897	134526197	-	1	0	ENSG00000107263	RAPGEF1	Rap guanine nucleotide exchange factor 1	Region6	9	-	134525515	134525629	134518625	134518804	134526196	134526336	8.61e-05	0.00204431	0.385,0.735,0.603,0.593,0.388,1.0,0.579,0.605,0.757,0.639	0.356,0.513,0.659,0.504,0.4,NA,0.491,0.588,0.548,0.662	0.104
2	161138815	161139115	-	0	1	ENSG00000153250	RBMS1	RNA binding motif single stranded interacting protein 1	Region5	2	-	161138767	161138815	161137824	161137875	161141285	161141379	0.000726577	0.0138152	0.259,0.266,0.605,0.116,0.379,1.0,0.29,0.492,0.411,0.46	0.317,0.22,0.086,0.322,0.12,NA,0.34,0.19,0.428,0.179	0.183
12	118454698	118454998	+	1	2	ENSG00000111445	RFC5	replication factor C subunit 5	Region2	12	+	118455494	118455657	118454533	118454697	118456876	118456941	0.00274333	0.0444437	0.226,0.222,0.176,0.45,0.111,1.0,0.119,0.102,0.364,0.046	0.313,0.045,0.171,0.026,0.1,NA,0.0,0.053,0.077,0.102	0.183
12	118454698	118454998	+	1	2	ENSG00000111445	RFC5	replication factor C subunit 5	Region2	12	+	118455494	118455620	118454507	118454697	118456876	118456941	0.000475832	0.009483	0.25,0.364,0.3,0.522,0.143,1.0,0.133,0.241,0.517,0.075	0.389,0.067,0.227,0.026,0.217,NA,0.071,0.143,0.077,0.12	0.206
12	118454698	118454998	+	1	2	ENSG00000111445	RFC5	replication factor C subunit 5	Region2	12	+	118455494	118455858	118454526	118454697	118456876	118456941	0.00274655	0.0444712	0.294,0.263,0.222,0.45,0.2,1.0,0.148,0.17,0.364,0.061	0.389,0.045,0.171,0.026,0.1,NA,0.037,0.053,0.077,0.17	0.199
12	118455620	118455920	+	0	1	ENSG00000111445	RFC5	replication factor C subunit 5	Region5	12	+	118455494	118455620	118454507	118454697	118456876	118456941	0.000475832	0.009483	0.25,0.364,0.3,0.522,0.143,1.0,0.133,0.241,0.517,0.075	0.389,0.067,0.227,0.026,0.217,NA,0.071,0.143,0.077,0.12	0.206
12	118456877	118457027	+	1	0	ENSG00000111445	RFC5	replication factor C subunit 5	Region7	12	+	118455494	118455657	118454533	118454697	118456876	118456941	0.00274333	0.0444437	0.226,0.222,0.176,0.45,0.111,1.0,0.119,0.102,0.364,0.046	0.313,0.045,0.171,0.026,0.1,NA,0.0,0.053,0.077,0.102	0.183
12	118456877	118457027	+	1	0	ENSG00000111445	RFC5	replication factor C subunit 5	Region7	12	+	118455494	118455620	118454507	118454697	118456876	118456941	0.000475832	0.009483	0.25,0.364,0.3,0.522,0.143,1.0,0.133,0.241,0.517,0.075	0.389,0.067,0.227,0.026,0.217,NA,0.071,0.143,0.077,0.12	0.206
12	118456877	118457027	+	1	0	ENSG00000111445	RFC5	replication factor C subunit 5	Region7	12	+	118455494	118455858	118454526	118454697	118456876	118456941	0.00274655	0.0444711	0.294,0.263,0.222,0.45,0.2,1.0,0.148,0.17,0.364,0.061	0.389,0.045,0.171,0.026,0.1,NA,0.037,0.053,0.077,0.17	0.199
5	176798398	176798698	+	0	1	ENSG00000169220	RGS14	regulator of G-protein signaling 14	Region2	5	+	176798475	176798590	176798350	176798397	176798873	176799602	1.2e-05	0.000413371	0.789,0.864,0.634,0.608,0.793,0.838,0.747,0.714,0.813,0.714	0.44,0.78,0.649,0.604,0.6,0.661,0.625,0.701,0.624,0.67	0.116
16	67690549	67690849	+	1	0	ENSG00000159753	RLTPR	capping protein regulator and myosin 1 linker 2	Region2	16	+	67690703	67690784	67690326	67690548	67691141	67691219	5.04e-15	5.34e-13	0.108,0.583,0.549,0.493,0.448,0.383,0.545,0.375,0.548,0.527	0.121,0.358,0.261,0.293,0.434,0.12,0.374,0.324,0.277,0.517	0.148
16	67690404	67690704	+	2	0	ENSG00000159753	RLTPR	capping protein regulator and myosin 1 linker 2	Region3	16	+	67690703	67690784	67690326	67690548	67691141	67691219	5.04e-15	5.34e-13	0.108,0.583,0.549,0.493,0.448,0.383,0.545,0.375,0.548,0.527	0.121,0.358,0.261,0.293,0.434,0.12,0.374,0.324,0.277,0.517	0.148
16	67690784	67691084	+	0	1	ENSG00000159753	RLTPR	capping protein regulator and myosin 1 linker 2	Region5	16	+	67690703	67690784	67690326	67690548	67691141	67691219	5.04e-15	5.34e-13	0.108,0.583,0.549,0.493,0.448,0.383,0.545,0.375,0.548,0.527	0.121,0.358,0.261,0.293,0.434,0.12,0.374,0.324,0.277,0.517	0.148
16	67690842	67691142	+	0	1	ENSG00000159753	RLTPR	capping protein regulator and myosin 1 linker 2	Region6	16	+	67690703	67690784	67690326	67690548	67691141	67691219	5.04e-15	5.34e-13	0.108,0.583,0.549,0.493,0.448,0.383,0.545,0.375,0.548,0.527	0.121,0.358,0.261,0.293,0.434,0.12,0.374,0.324,0.277,0.517	0.148
5	1628870	1629745	-	2	0	ENSG00000188002	RP11-43F13.1	NA	Region4	5	-	1628869	1629745	1602805	1602850	1632959	1633021	5.67e-08	2.9e-06	0.125,0.091,0.158,1.0,0.333,1.0,0.133,0.429,0.263,0.405	0.053,0.136,0.2,0.154,0.5,NA,0.022,0.385,0.333,0.306	0.162
5	1632960	1633110	-	0	1	ENSG00000188002	RP11-43F13.1	NA	Region7	5	-	1626900	1627041	1602805	1602850	1632959	1633021	2.12e-05	0.000674715	0.317,0.355,0.059,1.0,0.5,NA,0.257,0.6,0.391,0.353	0.294,0.136,0.0,0.083,0.714,NA,0.102,0.5,0.6,0.19	0.135
5	1632960	1633110	-	0	1	ENSG00000188002	RP11-43F13.1	NA	Region7	5	-	1630523	1630681	1602805	1602850	1632959	1633021	2.07e-08	1.11e-06	0.125,0.231,0.111,1.0,0.0,NA,0.103,0.333,0.067,0.083	0.1,0.095,0.0,0.12,0.0,NA,0.043,0.0,0.0,0.056	0.182
5	1632960	1633110	-	0	1	ENSG00000188002	RP11-43F13.1	NA	Region7	5	-	1628869	1629745	1602805	1602850	1632959	1633021	5.67e-08	2.9e-06	0.125,0.091,0.158,1.0,0.333,1.0,0.133,0.429,0.263,0.405	0.053,0.136,0.2,0.154,0.5,NA,0.022,0.385,0.333,0.306	0.162
1	222988421	222988721	+	0	1	ENSG00000228106	RP11-452F19.3	dispatched RND transporter family member 1	Region2	1	+	222997197	222997287	222988401	222988420	223000769	223000943	4.25e-10	2.9e-08	0.8,1.0,0.867,0.5,0.875,0.429,1.0,1.0,1.0,0.833	0.917,1.0,1.0,1.0,1.0,1.0,0.862,1.0,1.0,1.0	-0.147
7	143530340	143530976	-	1	0	ENSG00000253882	RP11-61L23.2	family with sequence similarity 115, member C pseudogene	Region4	7	-	143530339	143530976	143509061	143510872	143533732	143533801	3.03e-09	1.85e-07	0.239,0.516,0.167,0.565,0.682,0.1,0.385,0.424,0.333,0.377	0.125,0.216,0.667,0.276,0.429,0.0,0.185,0.231,0.059,0.238	0.136
X	20284382	20284682	-	1	1	ENSG00000177189	RPS6KA3	ribosomal protein S6 kinase A3	Region6	X	-	20258686	20258723	20252875	20252932	20284681	20284760	0.000109856	0.00254391	0.018,0.024,0.034,0.0,0.03,0.0,0.056,0.029,0.025,0.018	0.017,0.0,0.0,0.065,0.109,1.0,0.0,0.042,0.0,0.034	-0.103
14	75386248	75386548	-	2	1	ENSG00000198208	RPS6KL1	ribosomal protein S6 kinase like 1	Region6	14	-	75385215	75385308	75378496	75378544	75386547	75386672	0.00193207	0.0329456	0.467,0.6,0.75,1.0,0.7,1.0,0.909,0.833,0.684,0.676	0.368,0.714,0.714,1.0,0.462,NA,0.533,0.622,0.444,0.55	0.161
1	153508409	153508709	-	0	1	ENSG00000197956	S100A6	S100 calcium binding protein A6	Region5	1	-	153508264	153508409	153507677	153507836	153508583	153508720	2.15e-09	1.34e-07	0.593,0.857,0.7,0.733,0.564,1.0,0.918,0.692,0.824,0.902	0.396,0.677,0.714,0.615,0.535,0.0,0.451,0.625,0.429,0.455	0.289
1	153508284	153508584	-	0	1	ENSG00000197956	S100A6	S100 calcium binding protein A6	Region6	1	-	153508264	153508409	153507677	153507836	153508583	153508720	2.15e-09	1.34e-07	0.593,0.857,0.7,0.733,0.564,1.0,0.918,0.692,0.824,0.902	0.396,0.677,0.714,0.615,0.535,0.0,0.451,0.625,0.429,0.455	0.289
3	50212229	50212529	+	2	1	ENSG00000001617	SEMA3F	semaphorin 3F	Region3	3	+	50212528	50212621	50211663	50211783	50214200	50214294	1.7e-06	7.01e-05	0.5,0.241,0.294,0.333,0.222,1.0,0.37,0.215,0.186,0.277	0.211,0.19,0.2,0.103,0.286,NA,0.22,0.14,0.091,0.164	0.185
3	50212621	50212921	+	1	0	ENSG00000001617	SEMA3F	semaphorin 3F	Region5	3	+	50212528	50212621	50211663	50211783	50214200	50214294	1.7e-06	7.01e-05	0.5,0.241,0.294,0.333,0.222,1.0,0.37,0.215,0.186,0.277	0.211,0.19,0.2,0.103,0.286,NA,0.22,0.14,0.091,0.164	0.185
3	50213901	50214201	+	1	0	ENSG00000001617	SEMA3F	semaphorin 3F	Region6	3	+	50212528	50212621	50211663	50211783	50214200	50214294	1.7e-06	7.01e-05	0.5,0.241,0.294,0.333,0.222,1.0,0.37,0.215,0.186,0.277	0.211,0.19,0.2,0.103,0.286,NA,0.22,0.14,0.091,0.164	0.185
14	94849579	94849879	-	1	0	ENSG00000197249	SERPINA1	serpin family A member 1	Region2	14	-	94855155	94855347	94849507	94849578	94856793	94857013	3.78e-05	0.00108651	0.111,0.184,0.023,0.313,0.208,0.333,0.259,0.241,0.37,0.222	0.111,0.12,0.167,0.172,0.156,NA,0.1,0.0,0.097,0.04	0.119
2	73188378	73188678	-	1	0	ENSG00000144040	SFXN5	sideroflexin 5	Region2	2	-	73195576	73195662	73188259	73188377	73215386	73215477	5.15e-06	0.000191797	1.0,0.818,0.857,0.2,1.0,0.714,0.692,0.6,1.0,0.892	0.81,1.0,1.0,1.0,1.0,NA,0.636,0.571,1.0,0.895	-0.102
2	73195277	73195577	-	1	0	ENSG00000144040	SFXN5	sideroflexin 5	Region3	2	-	73195576	73195662	73188259	73188377	73215386	73215477	5.15e-06	0.000191797	1.0,0.818,0.857,0.2,1.0,0.714,0.692,0.6,1.0,0.892	0.81,1.0,1.0,1.0,1.0,NA,0.636,0.571,1.0,0.895	-0.102
4	48422142	48422292	+	0	1	ENSG00000109171	SLAIN2	SLAIN motif family member 2	Region7	4	+	48396592	48396670	48385663	48385801	48422141	48422460	2.19e-05	0.000689493	0.258,0.379,0.316,0.45,0.455,0.118,0.342,0.41,0.436,0.39	0.28,0.456,0.269,0.518,0.471,1.0,0.352,0.412,0.665,0.429	-0.13
11	65144548	65144848	-	1	0	ENSG00000162241	SLC25A45	solute carrier family 25 member 45	Region2	11	-	65146846	65147032	65144288	65144547	65147337	65147409	0.000142502	0.00322466	0.933,0.926,0.68,0.684,0.92,0.125,0.917,0.826,1.0,0.854	1.0,0.733,0.833,0.867,0.789,1.0,1.0,1.0,1.0,0.862	-0.122
5	135468652	135468952	+	1	0	ENSG00000113658	SMAD5	SMAD family member 5	Region2	5	+	135483520	135483595	135468535	135468651	135489280	135489852	0.00122007	0.0219292	0.606,0.111,0.6,1.0,1.0,0.5,0.467,0.63,0.308,0.556	0.69,0.304,0.684,0.895,0.75,NA,0.571,0.76,1.0,0.644	-0.122
1	28907741	28908041	-	0	1	ENSG00000197989	SNHG12	small nucleolar RNA host gene 12	Region5	1	-	28907622	28907741	28906044	28906099	28908101	28908346	6.88e-07	3.05e-05	1.0,0.733,0.846,1.0,0.75,0.667,1.0,0.63,0.862,0.867	1.0,1.0,1.0,1.0,1.0,1.0,0.846,1.0,1.0,1.0	-0.149
chr2	201194054	201194204	+	1	0	ENSG00000196141	SPATS2L	spermatogenesis associated serine rich 2 like	Region1	2	+	201242863	201243094	201194153	201194203	201253945	201254006	5.71e-30	1.34e-27	0.194,0.228,0.18,0.239,0.197,0.441,0.3,0.189,0.165,0.294	0.089,0.094,0.127,0.141,0.056,NA,0.057,0.108,0.004,0.09	0.158
2	201194204	201194504	+	1	0	ENSG00000196141	SPATS2L	spermatogenesis associated serine rich 2 like	Region2	2	+	201242863	201243094	201194153	201194203	201253945	201254006	5.71e-30	1.34e-27	0.194,0.228,0.18,0.239,0.197,0.441,0.3,0.189,0.165,0.294	0.089,0.094,0.127,0.141,0.056,NA,0.057,0.108,0.004,0.09	0.158
17	20059550	20059850	+	3	2	ENSG00000128487	SPECC1	sperm antigen with calponin homology and coiled-coil domains 1	Region2	17	+	20107645	20109225	20059301	20059549	20130725	20130933	1.06e-05	0.000366045	0.65,0.543,0.371,0.439,0.389,0.3,0.538,0.52,0.564,0.365	0.875,0.4,0.68,0.805,0.636,NA,0.544,0.742,0.556,0.75	-0.197
17	17726921	17727221	-	3	1	ENSG00000072310	SREBF1	sterol regulatory element binding transcription factor 1	Region5	17	-	17726831	17726921	17723403	17723835	17740040	17740301	4.96e-16	5.7e-14	0.409,0.261,0.248,0.363,0.452,0.674,0.284,0.343,0.28,0.372	0.423,0.382,0.481,0.465,0.539,NA,0.521,0.548,0.531,0.524	-0.122
9	130661482	130661782	-	0	1	ENSG00000160408	ST6GALNAC6	ST6 N-acetylgalactosaminide alpha-2,6-sialyltransferase 6	Region6	9	-	130660104	130660289	130658520	130658611	130661781	130661814	2.78e-07	1.31e-05	0.341,0.252,0.314,0.352,0.186,0.333,0.203,0.204,0.298,0.329	0.316,0.102,0.185,0.191,0.244,0.0,0.129,0.168,0.169,0.182	0.113
8	74658718	74659018	-	3	1	ENSG00000040341	STAU2	staufen double-stranded RNA binding protein 2	Region6	8	-	74651990	74652103	74650518	74650584	74659017	74659075	1.16e-14	1.2e-12	0.821,0.955,0.803,0.813,0.926,0.333,0.611,0.798,0.933,0.849	0.897,0.86,0.93,0.971,0.8,1.0,0.972,0.901,0.8,0.895	-0.118
8	110703262	110703562	-	0	1	ENSG00000147642	SYBU	syntabulin	Region6	8	-	110654956	110655161	110631070	110631268	110703561	110703834	0.000697721	0.0133362	1.0,0.654,0.957,1.0,0.917,0.077,0.762,0.853,0.87,0.93	0.867,1.0,0.893,0.964,1.0,1.0,0.818,0.963,1.0,0.852	-0.134
6	32812647	32812947	+	2	0	ENSG00000204261	TAPSAR1	PSMB8 antisense RNA 1 (head to head)	Region5	6	+	32812346	32812647	32811884	32812051	32813106	32813596	0.000223118	0.0048492	0.041,0.143,0.219,0.176,0.106,0.023,0.108,0.096,0.114,0.191	0.143,0.467,NA,0.4,0.294,NA,0.6,0.0,0.167,0.238	-0.167
6	32812647	32812947	+	2	0	ENSG00000204261	TAPSAR1	PSMB8 antisense RNA 1 (head to head)	Region5	6	+	32812586	32812647	32811909	32812051	32813194	32813987	1.67e-05	0.000549639	0.037,0.182,0.226,0.126,0.128,0.03,0.249,0.21,0.127,0.175	0.104,0.205,0.24,0.315,0.144,0.0,0.279,0.642,0.142,0.499	-0.108
6	32812647	32812947	+	2	0	ENSG00000204261	TAPSAR1	PSMB8 antisense RNA 1 (head to head)	Region5	6	+	32812421	32812647	32811909	32812051	32813194	32813763	2.23e-06	8.97e-05	0.049,0.205,0.274,0.175,0.171,0.136,0.286,0.237,0.156,0.223	0.095,0.231,0.44,0.429,0.164,0.0,0.259,0.619,0.286,0.487	-0.11
6	32813195	32813345	+	0	1	ENSG00000204261	TAPSAR1	PSMB8 antisense RNA 1 (head to head)	Region7	6	+	32812586	32812647	32811909	32812051	32813194	32813987	1.67e-05	0.000549639	0.037,0.182,0.226,0.126,0.128,0.03,0.249,0.21,0.127,0.175	0.104,0.205,0.24,0.315,0.144,0.0,0.279,0.642,0.142,0.499	-0.108
6	32813195	32813345	+	0	1	ENSG00000204261	TAPSAR1	PSMB8 antisense RNA 1 (head to head)	Region7	6	+	32812421	32812647	32811909	32812051	32813194	32813763	2.23e-06	8.97e-05	0.049,0.205,0.274,0.175,0.171,0.136,0.286,0.237,0.156,0.223	0.095,0.231,0.44,0.429,0.164,0.0,0.259,0.619,0.286,0.487	-0.11
9	131553054	131553354	+	0	1	ENSG00000107021	TBC1D13	TBC1 domain family member 13	Region5	9	+	131553013	131553054	131550612	131550686	131553658	131553720	9.84e-05	0.00230162	0.927,0.709,0.913,0.771,0.8,1.0,0.848,0.722,0.862,0.883	0.684,0.831,0.832,0.753,0.752,NA,0.64,0.644,0.691,0.81	0.106
X	9608251	9608401	+	1	0	ENSG00000101849	TBL1X	transducin beta like 1X-linked	Region1	X	+	9621584	9621729	9608312	9608400	9622254	9622362	0.0017058	0.0295061	0.205,0.515,0.818,0.167,0.529,1.0,0.7,0.766,0.672,0.583	0.34,0.576,0.73,0.842,1.0,1.0,0.708,0.697,0.455,0.676	-0.107
11	124496505	124496805	+	0	1	ENSG00000154144	TBRG1	transforming growth factor beta regulator 1	Region5	11	+	124496368	124496505	124495566	124495799	124496799	124496946	0.00024451	0.00525412	0.465,0.406,0.255,0.385,0.461,0.591,0.388,0.286,0.292,0.275	0.4,0.394,0.25,0.151,0.28,NA,0.133,0.223,0.356,0.291	0.105
11	124496500	124496800	+	0	1	ENSG00000154144	TBRG1	transforming growth factor beta regulator 1	Region6	11	+	124496368	124496505	124495566	124495799	124496799	124496946	0.00024451	0.00525412	0.465,0.406,0.255,0.385,0.461,0.591,0.388,0.286,0.292,0.275	0.4,0.394,0.25,0.151,0.28,NA,0.133,0.223,0.356,0.291	0.105
5	149769587	149769887	+	0	1	ENSG00000070814	TCOF1	treacle ribosome biogenesis factor 1	Region2	5	+	149771106	149771220	149769449	149769586	149771519	149771739	2.58e-06	0.000102539	0.425,0.631,0.609,0.721,0.635,0.316,0.669,0.721,0.649,0.662	0.585,0.845,0.78,0.714,0.667,1.0,0.709,0.709,0.761,0.771	-0.15
5	149769587	149769887	+	0	1	ENSG00000070814	TCOF1	treacle ribosome biogenesis factor 1	Region2	5	+	149771106	149771358	149769449	149769586	149771519	149774479	0.00114187	0.0206853	0.267,0.455,0.409,0.528,0.481,0.257,0.489,0.57,0.475,0.491	0.429,0.731,0.625,0.477,0.492,1.0,0.493,0.5,0.614,0.568	-0.151
2	88484770	88485070	+	2	0	ENSG00000144115	THNSL2	threonine synthase like 2	Region3	2	+	88485069	88485243	88478301	88478532	88485416	88486146	3.36e-22	5.53e-20	0.793,NA,0.4,0.286,0.357,0.217,0.474,1.0,0.467,0.385	0.884,1.0,0.5,0.4,0.333,NA,0.619,0.714,0.543,0.538	-0.128
2	88485117	88485417	+	0	1	ENSG00000144115	THNSL2	threonine synthase like 2	Region6	2	+	88485069	88485243	88478301	88478532	88485416	88486146	3.36e-22	5.53e-20	0.793,NA,0.4,0.286,0.357,0.217,0.474,1.0,0.467,0.385	0.884,1.0,0.5,0.4,0.333,NA,0.619,0.714,0.543,0.538	-0.128
14	67969904	67970204	-	1	0	ENSG00000198133	TMEM229B	transmembrane protein 229B	Region3	14	-	67970203	67970268	67953716	67953889	67981802	67981899	2.14e-05	0.00068003	0.142,0.118,0.076,0.0,0.0,NA,0.192,0.076,0.0,0.152	0.287,0.263,0.484,NA,0.0,NA,0.273,0.349,0.349,0.23	-0.195
21	34819025	34819325	-	1	0	ENSG00000142188	TMEM50B	transmembrane protein 50B	Region3	21	-	34819324	34819447	34811520	34811604	34821088	34821496	1.85e-06	7.55e-05	0.474,0.143,0.143,0.143,0.158,0.538,0.111,0.077,0.429,0.467	0.347,0.13,0.059,0.5,0.231,0.961,0.226,0.3,0.6,0.385	-0.106
21	34809190	34809299	-	0	1	ENSG00000142188	TMEM50B	transmembrane protein 50B	Region4	21	-	34809189	34809299	34804791	34805109	34811520	34811604	0.00154401	0.0270016	0.164,0.111,0.304,0.111,0.086,0.079,0.362,0.568,0.455,0.333	0.235,0.172,0.657,0.448,0.294,0.636,0.243,0.407,0.2,0.517	-0.124
13	101326698	101326998	-	0	1	ENSG00000125247	TMTC4	transmembrane and tetratricopeptide repeat containing 4	Region6	13	-	101322613	101322823	101320832	101321048	101326997	101327049	7.4e-09	4.28e-07	0.6,1.0,1.0,1.0,0.75,1.0,0.333,0.548,1.0,0.706	0.75,0.5,0.789,0.652,0.333,NA,0.25,0.3,1.0,0.607	0.218
3	170784115	170784415	-	1	0	ENSG00000154310	TNIK	TRAF2 and NCK interacting kinase	Region5	3	-	170783975	170784115	170780291	170781753	170784364	170784524	0.000477983	0.00951718	0.778,1.0,0.92,1.0,1.0,1.0,1.0,1.0,0.935,0.758	0.696,0.769,0.864,0.833,0.652,NA,1.0,0.949,0.636,0.846	0.134
3	170784065	170784365	-	1	0	ENSG00000154310	TNIK	TRAF2 and NCK interacting kinase	Region6	3	-	170783975	170784115	170780291	170781753	170784364	170784524	0.000477983	0.00951718	0.778,1.0,0.92,1.0,1.0,1.0,1.0,1.0,0.935,0.758	0.696,0.769,0.864,0.833,0.652,NA,1.0,0.949,0.636,0.846	0.134
5	150466346	150466646	-	1	0	ENSG00000145901	TNIP1	TNFAIP3 interacting protein 1	Region6	5	-	150444520	150444692	150443173	150443308	150466645	150466719	1.79e-35	5.09e-33	0.839,0.815,0.877,0.844,0.771,0.924,0.759,0.878,0.797,0.804	0.856,0.962,0.98,0.962,0.884,1.0,0.901,1.0,1.0,0.955	-0.119
8	144416455	144416755	-	1	0	ENSG00000184428	TOP1MT	topoisomerase (DNA) I, mitochondrial	Region5	8	-	144416277	144416455	144413393	144413509	144416909	144416965	4.32e-71	3.47e-68	0.046,0.0,0.057,0.125,0.0,0.231,0.053,0.091,0.038,0.179	0.049,0.106,0.24,0.188,0.0,1.0,0.119,0.19,0.091,0.355	-0.152
8	144416610	144416910	-	1	0	ENSG00000184428	TOP1MT	topoisomerase (DNA) I, mitochondrial	Region6	8	-	144416277	144416455	144413393	144413509	144416909	144416965	4.32e-71	3.47e-68	0.046,0.0,0.057,0.125,0.0,0.231,0.053,0.091,0.038,0.179	0.049,0.106,0.24,0.188,0.0,1.0,0.119,0.19,0.091,0.355	-0.152
13	45950896	45951196	+	1	2	ENSG00000170919	TPT1-AS1	NA	Region6	13	+	45944214	45944317	45918513	45918581	45951195	45951350	3.8e-07	1.75e-05	0.667,1.0,0.6,0.75,0.5,NA,0.444,0.484,0.667,0.789	0.739,1.0,0.846,1.0,0.846,1.0,0.5,0.704,0.75,0.75	-0.158
13	45950896	45951196	+	1	2	ENSG00000170919	TPT1-AS1	NA	Region6	13	+	45944093	45944317	45918463	45918581	45951195	45951262	2.84e-10	1.97e-08	0.667,1.0,0.6,0.5,0.6,NA,0.5,0.6,0.769,0.758	0.824,1.0,0.892,1.0,0.895,1.0,0.818,0.8,0.867,0.8	-0.224
22	28381380	28381680	+	1	0	ENSG00000235954	TTC28-AS1	TTC28 antisense RNA 1	Region6	22	+	28318005	28318166	28315457	28315533	28381679	28382217	1.57e-08	8.64e-07	1.0,1.0,0.92,1.0,1.0,1.0,0.882,1.0,1.0,1.0	0.571,0.778,0.789,0.862,1.0,1.0,1.0,0.619,1.0,0.697	0.149
21	38445774	38446074	+	0	1	ENSG00000182670	TTC3	tetratricopeptide repeat domain 3	Region2	21	+	38459546	38459701	38445550	38445773	38480691	38480746	1.77e-07	8.5e-06	0.104,0.286,0.133,NA,0.077,0.0,0.176,0.333,0.29,0.185	0.178,0.778,0.111,0.429,0.143,NA,0.257,0.404,0.556,0.169	-0.16
2	47185334	47185634	+	0	1	ENSG00000068724	TTC7A	tetratricopeptide repeat domain 7A	Region3	2	+	47185633	47185691	47183977	47184146	47202111	47202242	0.000761856	0.0144295	0.175,0.086,0.036,0.361,0.112,1.0,0.331,0.204,0.078,0.0	0.0,0.086,0.139,0.072,0.0,NA,0.045,0.102,0.0,0.175	0.17
8	15615364	15615664	+	1	0	ENSG00000104723	TUSC3	tumor suppressor candidate 3	Region5	8	+	15615299	15615364	15601046	15601121	15621711	15621968	6.79e-14	6.49e-12	0.651,0.803,0.813,0.71,0.667,0.852,0.507,0.967,0.882,0.787	0.834,0.827,0.944,0.877,0.785,1.0,0.776,0.887,0.82,0.9	-0.101
19	10488590	10488890	-	0	1	ENSG00000105397	TYK2	tyrosine kinase 2	Region6	19	-	10480432	10480553	10479004	10479094	10488889	10489102	0.000156003	0.00350206	0.118,0.041,0.102,0.125,0.0,1.0,0.017,0.0,0.08,0.0	0.017,0.0,0.013,0.0,0.0,NA,0.091,0.014,0.0,0.015	0.132
4	68586769	68587069	+	1	0	ENSG00000248049	UBA6-AS1	UBA6 antisense RNA 1 (head to head)	Region5	4	+	68586139	68586769	68567078	68567202	68594257	68594404	0.00278207	0.0449796	0.961,0.44,0.66,0.714,0.933,0.053,1.0,0.86,0.5,0.895	0.935,0.769,0.771,0.778,0.789,NA,0.933,1.0,0.75,0.839	-0.139
X	155169365	155169515	+	1	0	ENSG00000124333	VAMP7	vesicle associated membrane protein 7	Region7	X	+	155149476	155149544	155130160	155130251	155169364	155169457	8.19e-07	3.57e-05	0.955,0.975,0.917,0.971,0.942,1.0,0.96,0.968,0.96,0.966	0.951,0.977,0.877,0.918,1.0,0.0,1.0,0.939,0.918,1.0	0.103
14	100835596	100835896	-	2	0	ENSG00000140105	WARS	tryptophanyl-tRNA synthetase	Region2	14	-	100840472	100840581	100835423	100835595	100842596	100842671	0	0	0.118,0.057,0.84,0.835,0.031,0.104,0.093,0.07,0.82,0.854	0.0,0.005,0.105,0.136,0.0,NA,0.0,0.0,0.101,0.146	0.327
14	100835596	100835896	-	2	0	ENSG00000140105	WARS	tryptophanyl-tRNA synthetase	Region2	14	-	100841619	100841740	100835423	100835595	100842596	100842648	0	0	0.956,0.942,0.954,0.948,0.941,0.931,0.953,0.953,0.943,0.948	0.235,0.338,0.312,0.342,0.19,1.0,0.218,0.333,0.342,0.312	0.585
14	100835596	100835896	-	2	0	ENSG00000140105	WARS	tryptophanyl-tRNA synthetase	Region2	14	-	100841619	100841743	100835423	100835595	100842596	100842624	0	0	0.956,0.942,0.954,0.948,0.941,0.931,0.953,0.953,0.943,0.948	0.27,0.338,0.329,0.356,0.194,1.0,0.218,0.339,0.355,0.328	0.574
14	100835596	100835896	-	2	0	ENSG00000140105	WARS	tryptophanyl-tRNA synthetase	Region2	14	-	100840472	100840602	100835423	100835595	100842596	100842622	0	0	0.118,0.057,0.84,0.835,0.031,0.104,0.093,0.07,0.819,0.854	0.0,0.005,0.119,0.126,0.0,NA,0.004,0.0,0.075,0.141	0.33
14	100835596	100835896	-	2	0	ENSG00000140105	WARS	tryptophanyl-tRNA synthetase	Region2	14	-	100840472	100840602	100835423	100835595	100841847	100841944	9.1e-233	3.79e-229	0.948,1.0,0.999,0.996,0.742,1.0,0.884,0.853,0.999,1.0	NA,0.077,0.862,0.647,NA,NA,0.0,0.0,0.8,0.932	0.468
14	100835596	100835896	-	2	0	ENSG00000140105	WARS	tryptophanyl-tRNA synthetase	Region2	14	-	100841619	100841687	100835423	100835595	100842596	100842644	0	0	0.958,0.945,0.956,0.95,0.944,0.934,0.955,0.956,0.946,0.95	0.249,0.337,0.306,0.347,0.202,1.0,0.229,0.344,0.349,0.314	0.582
14	100835595	100835895	-	2	1	ENSG00000140105	WARS	tryptophanyl-tRNA synthetase	Region5	14	-	100835423	100835595	100828044	100828258	100842596	100843142	0	0	0.972,0.983,0.991,0.993,0.985,0.991,0.988,0.991,0.992,0.991	0.6,0.914,0.886,0.906,0.847,1.0,0.803,0.867,0.925,0.906	0.122
14	100842297	100842597	-	0	1	ENSG00000140105	WARS	tryptophanyl-tRNA synthetase	Region6	14	-	100840472	100840581	100835423	100835595	100842596	100842671	0	0	0.118,0.057,0.84,0.835,0.031,0.104,0.093,0.07,0.82,0.854	0.0,0.005,0.105,0.136,0.0,NA,0.0,0.0,0.101,0.146	0.327
14	100842297	100842597	-	0	1	ENSG00000140105	WARS	tryptophanyl-tRNA synthetase	Region6	14	-	100841619	100841740	100835423	100835595	100842596	100842648	0	0	0.956,0.942,0.954,0.948,0.941,0.931,0.953,0.953,0.943,0.948	0.235,0.338,0.312,0.342,0.19,1.0,0.218,0.333,0.342,0.312	0.585
14	100842297	100842597	-	0	1	ENSG00000140105	WARS	tryptophanyl-tRNA synthetase	Region6	14	-	100840472	100840602	100828066	100828258	100842596	100842622	1.21e-176	3.1e-173	0.104,0.015,0.63,0.73,0.05,0.0,0.028,0.059,0.687,0.669	0.0,0.0,0.13,0.172,0.0,NA,0.013,0.0,0.0,0.071	0.254
14	100842297	100842597	-	0	1	ENSG00000140105	WARS	tryptophanyl-tRNA synthetase	Region6	14	-	100841619	100841743	100828044	100828258	100842596	100842624	5.36e-198	1.67e-194	0.942,0.917,0.938,0.946,0.925,0.94,0.933,0.943,0.95,0.945	0.228,0.556,0.298,0.415,0.294,NA,0.232,0.351,0.375,0.429	0.585
14	100842297	100842597	-	0	1	ENSG00000140105	WARS	tryptophanyl-tRNA synthetase	Region6	14	-	100841619	100841687	100828044	100828258	100842596	100842644	0	0	0.945,0.92,0.94,0.948,0.928,0.942,0.936,0.945,0.951,0.946	0.177,0.522,0.191,0.304,0.29,NA,0.249,0.335,0.239,0.335	0.647
14	100842297	100842597	-	0	1	ENSG00000140105	WARS	tryptophanyl-tRNA synthetase	Region6	14	-	100841619	100841743	100835423	100835595	100842596	100842624	0	0	0.956,0.942,0.954,0.948,0.941,0.931,0.953,0.953,0.943,0.948	0.27,0.338,0.329,0.356,0.194,1.0,0.218,0.339,0.355,0.328	0.574
14	100842297	100842597	-	0	1	ENSG00000140105	WARS	tryptophanyl-tRNA synthetase	Region6	14	-	100840472	100840581	100828192	100828258	100842596	100842671	0	0	0.104,0.015,0.629,0.736,0.05,0.0,0.028,0.059,0.697,0.673	0.0,0.0,0.048,0.226,0.0,NA,0.0,0.0,0.231,0.103	0.232
14	100842297	100842597	-	0	1	ENSG00000140105	WARS	tryptophanyl-tRNA synthetase	Region6	14	-	100840472	100840602	100835423	100835595	100842596	100842622	0	0	0.118,0.057,0.84,0.835,0.031,0.104,0.093,0.07,0.819,0.854	0.0,0.005,0.119,0.126,0.0,NA,0.004,0.0,0.075,0.141	0.33
14	100842297	100842597	-	0	1	ENSG00000140105	WARS	tryptophanyl-tRNA synthetase	Region6	14	-	100835423	100835595	100828044	100828258	100842596	100843142	0	0	0.972,0.983,0.991,0.993,0.985,0.991,0.988,0.991,0.992,0.991	0.6,0.914,0.886,0.906,0.847,1.0,0.803,0.867,0.925,0.906	0.122
14	100842297	100842597	-	0	1	ENSG00000140105	WARS	tryptophanyl-tRNA synthetase	Region6	14	-	100841619	100841687	100835423	100835595	100842596	100842644	0	0	0.958,0.945,0.956,0.95,0.944,0.934,0.955,0.956,0.946,0.95	0.249,0.337,0.306,0.347,0.202,1.0,0.229,0.344,0.349,0.314	0.582
2	74686565	74686689	+	0	1	ENSG00000239779	WBP1	WW domain binding protein 1	Region4	2	+	74686564	74686689	74685958	74686046	74686769	74686872	0.000107335	0.00249212	0.714,0.25,0.517,0.75,0.684,0.765,0.5,0.111,0.474,0.913	0.704,1.0,0.846,0.714,0.75,1.0,0.765,0.286,0.7,0.9	-0.199
7	73254444	73254744	-	6	1	ENSG00000165171	WBSCR27	Williams Beuren syndrome chromosome region 27	Region3	7	-	73254743	73254879	73248919	73249332	73255399	73255528	3.96e-06	0.000151609	0.739,0.412,0.676,1.0,0.84,0.396,0.846,0.907,1.0,0.652	0.765,0.714,0.478,0.615,0.412,0.0,1.0,0.65,0.818,0.63	0.139
7	73254879	73255179	-	0	1	ENSG00000165171	WBSCR27	Williams Beuren syndrome chromosome region 27	Region5	7	-	73254743	73254879	73248919	73249332	73255399	73255528	3.96e-06	0.000151609	0.739,0.412,0.676,1.0,0.84,0.396,0.846,0.907,1.0,0.652	0.765,0.714,0.478,0.615,0.412,0.0,1.0,0.65,0.818,0.63	0.139
7	100001317	100001467	-	0	1	ENSG00000078487	ZCWPW1	zinc finger CW-type and PWWP domain containing 1	Region7	7	-	100000138	100000199	99998495	99998959	100001316	100001408	7.27e-08	3.67e-06	0.378,0.216,0.257,0.0,0.392,0.525,0.469,0.167,0.356,0.413	0.052,0.293,0.203,0.172,0.216,0.0,0.191,0.392,0.084,0.26	0.131
3	44974482	44974782	-	0	1	ENSG00000163812	ZDHHC3	zinc finger DHHC-type containing 3	Region5	3	-	44974398	44974482	44968014	44968339	44974609	44974941	3.71e-05	0.00106843	1.0,0.75,1.0,0.742,1.0,1.0,0.867,0.813,0.913,0.854	1.0,1.0,1.0,1.0,1.0,NA,1.0,1.0,1.0,1.0	-0.106
8	82629484	82629523	-	0	1	ENSG00000104231	ZFAND1	zinc finger AN1-type containing 1	Region4	8	-	82629483	82629523	82627221	82627349	82630416	82630459	6.05e-07	2.7e-05	0.42,0.509,0.434,0.469,0.524,0.663,0.554,0.671,0.669,0.648	0.52,0.454,0.373,0.432,0.396,0.068,0.377,0.533,0.454,0.562	0.139
16	68573361	68573661	+	0	1	ENSG00000184939	ZFP90	ZFP90 zinc finger protein	Region3	16	+	68573660	68573728	68567600	68567758	68591900	68592027	0.00124362	0.0223066	0.803,0.872,0.917,0.786,0.833,NA,0.791,1.0,0.876,0.835	0.86,0.412,0.591,0.817,0.677,NA,0.759,0.688,1.0,0.929	0.109
16	71487146	71487296	-	1	0	ENSG00000167377	ZNF23	zinc finger protein 23	Region7	16	-	71484496	71484618	71481512	71483788	71487145	71487253	5.5e-06	0.000203532	0.077,0.143,0.149,0.356,0.214,0.8,0.027,0.22,0.0,0.259	0.12,0.029,0.098,0.143,0.13,0.317,0.032,0.0,0.056,0.222	0.11
8	146002962	146003262	-	1	0	ENSG00000196378	ZNF34	zinc finger protein 34	Region5	8	-	146002842	146002962	145998498	146000000	146003422	146003549	0.000200217	0.00439411	0.945,0.833,0.925,0.815,0.962,0.543,0.75,0.926,0.805,0.931	0.833,0.833,1.0,0.927,1.0,1.0,0.952,1.0,1.0,0.922	-0.103
8	146003123	146003423	-	1	0	ENSG00000196378	ZNF34	zinc finger protein 34	Region6	8	-	146002842	146002962	145998498	146000000	146003422	146003549	0.000200217	0.00439411	0.945,0.833,0.925,0.815,0.962,0.543,0.75,0.926,0.805,0.931	0.833,0.833,1.0,0.927,1.0,1.0,0.952,1.0,1.0,0.922	-0.103
10	38384152	38384452	+	0	1	ENSG00000075407	ZNF37A	zinc finger protein 37A	Region5	10	+	38383858	38384152	38383278	38383418	38384465	38384487	0.000261996	0.00559125	0.647,0.789,0.733,0.5,0.882,NA,0.226,0.529,0.625,0.487	0.455,0.4,0.615,0.333,0.294,NA,0.185,0.4,0.417,0.524	0.199
10	38384166	38384466	+	0	1	ENSG00000075407	ZNF37A	zinc finger protein 37A	Region6	10	+	38383858	38384152	38383278	38383418	38384465	38384487	0.000261996	0.00559125	0.647,0.789,0.733,0.5,0.882,NA,0.226,0.529,0.625,0.487	0.455,0.4,0.615,0.333,0.294,NA,0.185,0.4,0.417,0.524	0.199
2	27806010	27806310	+	1	0	ENSG00000243943	ZNF512	zinc finger protein 512	Region2	2	+	27806524	27806583	27805896	27806009	27820936	27821121	0.000112574	0.00259927	1.0,1.0,0.864,0.887,0.737,1.0,0.931,0.86,0.949,0.712	0.818,0.692,0.961,0.922,1.0,0.0,0.708,0.849,1.0,0.897	0.109
2	27820937	27821087	+	0	1	ENSG00000243943	ZNF512	zinc finger protein 512	Region7	2	+	27806524	27806583	27805896	27806009	27820936	27821121	0.000112574	0.00259927	1.0,1.0,0.864,0.887,0.737,1.0,0.931,0.86,0.949,0.712	0.818,0.692,0.961,0.922,1.0,0.0,0.708,0.849,1.0,0.897	0.109
19	58387984	58388284	-	0	1	ENSG00000204514	ZNF814	zinc finger protein 814	Region3	19	-	58388283	58388410	58361687	58361929	58400134	58400175	0.000114339	0.00263514	0.837,0.721,0.632,0.862,0.688,0.75,0.667,0.556,0.773,0.783	0.591,0.711,0.571,0.432,0.857,0.261,0.806,0.561,0.889,0.59	0.1

## Sheet: Supple Table 7_T1DGwas_sQTL
variant	Chr	pos.hg38.	LD_r	LD_D'	Ref	Alt	AFR_freq	AMR_freq	ASN_freq	EUR_freq	GENCODEgenes	dbSNP_func_annot	IndexSNP	IndexSNP_P.VALUE	IndexSNP_ORorBETA	IndexSNP_95%CI	variant_id	phenotype_id	tss_distance	ma_samples	ma_count	maf	pval_nominal	slope	slope_se	pval_nominal_threshold	min_pval_nominal	pval_beta	GeneID	description	hgnc_symbol
rs772920	12	55996580	0.81	0.92	C	G	0.06	0.26	0.26	0.32	599bp 5' of SUOX	3'-UTR	rs1701704	9e-10	1.25	[1.12-1.40]	chr12_55996580_C_G_b38	chr12:55997339:56002212:clu_3525:ENSG00000139531.12	-600	161	194	0.318033	1.67829e-06	0.432106	0.088311	4.02378e-06	7.5471e-09	0.000609558	ENSG00000139531	sulfite oxidase [Source:HGNC Symbol;Acc:HGNC:11460]	SUOX
rs705702	12	55996852	0.81	0.92	A	G	0.06	0.26	0.26	0.32	327bp 5' of SUOX		rs1701704	9e-10	1.25	[1.12-1.40]	chr12_55996852_A_G_b38	chr12:55997339:56002212:clu_3525:ENSG00000139531.12	-328	161	194	0.318033	1.67829e-06	0.432106	0.088311	4.02378e-06	7.5471e-09	0.000609558	ENSG00000139531	sulfite oxidase [Source:HGNC Symbol;Acc:HGNC:11460]	SUOX
rs1689510	12	56002984	0.92	0.96	G	C	0.09	0.25	0.25	0.33	SUOX	intronic	rs1701704	9e-10	1.25	[1.12-1.40]	chr12_56002984_G_C_b38	chr12:55997339:56002212:clu_3525:ENSG00000139531.12	5804	161	192	0.314754	3.34057e-06	0.422329	0.0890199	4.02378e-06	7.5471e-09	0.000609558	ENSG00000139531	sulfite oxidase [Source:HGNC Symbol;Acc:HGNC:11460]	SUOX
rs3104364	6	32636191	0.84	0.96	A	G	0.46	0.68	0.55	0.57	HLA-DQA1		rs9272346	6e-129	NA		chr6_32636191_A_G_b38	chr6:32579104:32580247:clu_29097:ENSG00000198502.5	105904	198	243	0.398361	2.83849e-06	0.445765	0.0932613	4.26217e-06	1.79874e-81	3.45051e-61	ENSG00000198502	major histocompatibility complex, class II, DR beta 5 [Source:HGNC Symbol;Acc:HGNC:4953]	HLA-DRB5
rs3104363	6	32636223	0.84	0.96	G	T	0.45	0.69	0.55	0.57	HLA-DQA1		rs9272346	6e-129	NA		chr6_32636223_G_T_b38	chr6:32579104:32580247:clu_29097:ENSG00000198502.5	105936	198	239	0.391803	1.04978e-06	0.473125	0.0947681	4.26217e-06	1.79874e-81	3.45051e-61	ENSG00000198502	major histocompatibility complex, class II, DR beta 5 [Source:HGNC Symbol;Acc:HGNC:4953]	HLA-DRB5
rs9272350	6	32636633	0.8	0.97	T	A	0.35	0.62	0.51	0.51	HLA-DQA1		rs9272346	6e-129	NA		chr6_32636633_T_A_b38	chr6:32579104:32580247:clu_29097:ENSG00000198502.5	106346	198	240	0.393443	2.83201e-07	0.493198	0.0937206	4.26217e-06	1.79874e-81	3.45051e-61	ENSG00000198502	major histocompatibility complex, class II, DR beta 5 [Source:HGNC Symbol;Acc:HGNC:4953]	HLA-DRB5
rs149299	16	28473820	0.9	0.97	T	C	0.03	0.38	0.12	0.35	RP11-435I10.4		rs4788084	3e-13	1.09	[1.02-1.16]	chr16_28473820_T_C_b38	chr16:28538155:28538526:clu_14274:ENSG00000176046.8	-65354	185	228	0.373771	6.96507e-08	-0.362835	0.0654903	1.39164e-05	1.52282e-18	1.93375e-10	ENSG00000176046	nuclear protein 1, transcriptional regulator [Source:HGNC Symbol;Acc:HGNC:29990]	NUPR1
rs151179	16	28475735	0.89	0.96	A	G	0.12	0.39	0.12	0.35	RP11-435I10.4		rs4788084	3e-13	1.09	[1.02-1.16]	chr16_28475735_A_G_b38	chr16:28538155:28538526:clu_14274:ENSG00000176046.8	-63439	190	234	0.383607	9.79877e-09	-0.378881	0.0640841	1.39164e-05	1.52282e-18	1.93375e-10	ENSG00000176046	nuclear protein 1, transcriptional regulator [Source:HGNC Symbol;Acc:HGNC:29990]	NUPR1
rs181195	16	28477048	0.9	0.97	A	T	0.03	0.38	0.12	0.35	RP11-435I10.4		rs4788084	3e-13	1.09	[1.02-1.16]	chr16_28477048_A_T_b38	chr16:28538155:28538526:clu_14274:ENSG00000176046.8	-62126	184	227	0.372131	3.70993e-08	-0.36817	0.0650281	1.39164e-05	1.52282e-18	1.93375e-10	ENSG00000176046	nuclear protein 1, transcriptional regulator [Source:HGNC Symbol;Acc:HGNC:29990]	NUPR1
rs151181	16	28479196	0.91	0.97	T	C	0.15	0.4	0.13	0.35	RP11-435I10.4	intronic	rs4788084	3e-13	1.09	[1.02-1.16]	chr16_28479196_T_C_b38	chr16:28538155:28538526:clu_14274:ENSG00000176046.8	-59978	189	233	0.381967	1.83428e-08	-0.371251	0.0640612	1.39164e-05	1.52282e-18	1.93375e-10	ENSG00000176046	nuclear protein 1, transcriptional regulator [Source:HGNC Symbol;Acc:HGNC:29990]	NUPR1
rs151303	16	28481189	0.91	0.97	C	A	0.12	0.39	0.12	0.35	RP11-435I10.4	intronic	rs4788084	3e-13	1.09	[1.02-1.16]	chr16_28481189_C_A_b38	chr16:28538155:28538526:clu_14274:ENSG00000176046.8	-57985	189	232	0.380328	1.17704e-08	-0.378579	0.0644037	1.39164e-05	1.52282e-18	1.93375e-10	ENSG00000176046	nuclear protein 1, transcriptional regulator [Source:HGNC Symbol;Acc:HGNC:29990]	NUPR1
rs151182	16	28484431	0.91	0.97	C	T	0.12	0.39	0.13	0.35	RP11-435I10.4	intronic	rs4788084	3e-13	1.09	[1.02-1.16]	chr16_28484431_C_T_b38	chr16:28538155:28538526:clu_14274:ENSG00000176046.8	-54743	190	233	0.381967	2.25756e-08	-0.372085	0.0646416	1.39164e-05	1.52282e-18	1.93375e-10	ENSG00000176046	nuclear protein 1, transcriptional regulator [Source:HGNC Symbol;Acc:HGNC:29990]	NUPR1
rs151301	16	28485738	0.91	0.97	T	A	0.12	0.39	0.12	0.35	RP11-435I10.4	intronic	rs4788084	3e-13	1.09	[1.02-1.16]	chr16_28485738_T_A_b38	chr16:28538155:28538526:clu_14274:ENSG00000176046.8	-53436	189	232	0.380328	1.17704e-08	-0.378579	0.0644037	1.39164e-05	1.52282e-18	1.93375e-10	ENSG00000176046	nuclear protein 1, transcriptional regulator [Source:HGNC Symbol;Acc:HGNC:29990]	NUPR1
rs34835	16	28487970	0.93	0.97	A	G	0.29	0.41	0.25	0.36	RP11-435I10.4	intronic	rs4788084	3e-13	1.09	[1.02-1.16]	chr16_28487970_A_G_b38	chr16:28538155:28538526:clu_14274:ENSG00000176046.8	-51204	200	247	0.404918	8.69704e-08	-0.354323	0.0644576	1.39164e-05	1.52282e-18	1.93375e-10	ENSG00000176046	nuclear protein 1, transcriptional regulator [Source:HGNC Symbol;Acc:HGNC:29990]	NUPR1
rs149271	16	28495551	0.92	0.97	A	G	0.35	0.35	0.11	0.36	CLN3	synonymous	rs4788084	3e-13	1.09	[1.02-1.16]	chr16_28495551_A_G_b38	chr16:28538155:28538526:clu_14274:ENSG00000176046.8	-43623	201	249	0.408197	1.97888e-11	-0.428454	0.0612697	1.39164e-05	1.52282e-18	1.93375e-10	ENSG00000176046	nuclear protein 1, transcriptional regulator [Source:HGNC Symbol;Acc:HGNC:29990]	NUPR1
rs180743	16	28496323	0.85	0.96	C	G	0.35	0.35	0.11	0.34	APOBR	missense	rs4788084	3e-13	1.09	[1.02-1.16]	chr16_28496323_C_G_b38	chr16:28538155:28538526:clu_14274:ENSG00000176046.8	-42851	201	249	0.408197	1.97888e-11	-0.428454	0.0612697	1.39164e-05	1.52282e-18	1.93375e-10	ENSG00000176046	nuclear protein 1, transcriptional regulator [Source:HGNC Symbol;Acc:HGNC:29990]	NUPR1
rs180744	16	28496727	0.92	0.97	A	G	0.43	0.35	0.11	0.36	APOBR	synonymous	rs4788084	3e-13	1.09	[1.02-1.16]	chr16_28496727_A_G_b38	chr16:28538155:28538526:clu_14274:ENSG00000176046.8	-42447	201	250	0.409836	2.6634e-11	-0.42426	0.0610985	1.39164e-05	1.52282e-18	1.93375e-10	ENSG00000176046	nuclear protein 1, transcriptional regulator [Source:HGNC Symbol;Acc:HGNC:29990]	NUPR1
rs151174	16	28496748	0.93	0.98	C	T	0.21	0.33	0.11	0.35	APOBR	synonymous	rs4788084	3e-13	1.09	[1.02-1.16]	chr16_28496748_C_T_b38	chr16:28538155:28538526:clu_14274:ENSG00000176046.8	-42426	191	230	0.377049	8.49142e-10	-0.409743	0.0644903	1.39164e-05	1.52282e-18	1.93375e-10	ENSG00000176046	nuclear protein 1, transcriptional regulator [Source:HGNC Symbol;Acc:HGNC:29990]	NUPR1
rs40831	16	28497126	0.87	0.95	A	G	0.54	0.43	0.32	0.37	APOBR	synonymous	rs4788084	3e-13	1.09	[1.02-1.16]	chr16_28497126_A_G_b38	chr16:28538155:28538526:clu_14274:ENSG00000176046.8	-42048	211	273	0.447541	1.09918e-11	-0.425166	0.0599724	1.39164e-05	1.52282e-18	1.93375e-10	ENSG00000176046	nuclear protein 1, transcriptional regulator [Source:HGNC Symbol;Acc:HGNC:29990]	NUPR1
rs40834	16	28499072	0.8	0.98	C	T	0.42	0.48	0.34	0.41	101bp 3' of APOBR		rs4788084	3e-13	1.09	[1.02-1.16]	chr16_28499072_C_T_b38	chr16:28538155:28538526:clu_14274:ENSG00000176046.8	-40102	214	282	0.462295	2.43994e-10	-0.391016	0.0595118	1.39164e-05	1.52282e-18	1.93375e-10	ENSG00000176046	nuclear protein 1, transcriptional regulator [Source:HGNC Symbol;Acc:HGNC:29990]	NUPR1
rs26528	16	28506388	0.82	0.99	T	C	0.35	0.5	0.36	0.41	IL27	intronic	rs4788084	3e-13	1.09	[1.02-1.16]	chr16_28506388_T_C_b38	chr16:28538155:28538526:clu_14274:ENSG00000176046.8	-32786	213	279	0.457377	4.04194e-11	-0.409201	0.0595236	1.39164e-05	1.52282e-18	1.93375e-10	ENSG00000176046	nuclear protein 1, transcriptional regulator [Source:HGNC Symbol;Acc:HGNC:29990]	NUPR1
rs153109	16	28507775	0.82	0.99	T	C	0.35	0.5	0.36	0.41	IL27		rs4788084	3e-13	1.09	[1.02-1.16]	chr16_28507775_T_C_b38	chr16:28538155:28538526:clu_14274:ENSG00000176046.8	-31399	213	279	0.457377	4.04194e-11	-0.409201	0.0595236	1.39164e-05	1.52282e-18	1.93375e-10	ENSG00000176046	nuclear protein 1, transcriptional regulator [Source:HGNC Symbol;Acc:HGNC:29990]	NUPR1
rs240707	16	28513291	0.83	0.99	C	G	0.37	0.51	0.36	0.4	1.2kb 5' of IL27		rs4788084	3e-13	1.09	[1.02-1.16]	chr16_28513291_C_G_b38	chr16:28538155:28538526:clu_14274:ENSG00000176046.8	-25883	214	281	0.460656	1.02705e-11	-0.41989	0.0591358	1.39164e-05	1.52282e-18	1.93375e-10	ENSG00000176046	nuclear protein 1, transcriptional regulator [Source:HGNC Symbol;Acc:HGNC:29990]	NUPR1
rs153111	16	28513402	0.83	1	C	T	0.38	0.51	0.35	0.41	1.4kb 5' of IL27		rs4788084	3e-13	1.09	[1.02-1.16]	chr16_28513402_C_T_b38	chr16:28538155:28538526:clu_14274:ENSG00000176046.8	-25772	213	279	0.457377	1.61787e-11	-0.416783	0.0593196	1.39164e-05	1.52282e-18	1.93375e-10	ENSG00000176046	nuclear protein 1, transcriptional regulator [Source:HGNC Symbol;Acc:HGNC:29990]	NUPR1
rs153106	16	28515576	0.99	1	T	C	0.26	0.41	0.26	0.36	3.5kb 5' of IL27		rs4788084	3e-13	1.09	[1.02-1.16]	chr16_28515576_T_C_b38	chr16:28538155:28538526:clu_14274:ENSG00000176046.8	-23598	193	243	0.398361	3.63626e-10	-0.39823	0.0612513	1.39164e-05	1.52282e-18	1.93375e-10	ENSG00000176046	nuclear protein 1, transcriptional regulator [Source:HGNC Symbol;Acc:HGNC:29990]	NUPR1
rs240705	16	28518395	0.98	0.99	C	T	0.26	0.41	0.26	0.36	6.3kb 5' of IL27		rs4788084	3e-13	1.09	[1.02-1.16]	chr16_28518395_C_T_b38	chr16:28538155:28538526:clu_14274:ENSG00000176046.8	-20779	193	244	0.4	5.56212e-10	-0.391112	0.0608479	1.39164e-05	1.52282e-18	1.93375e-10	ENSG00000176046	nuclear protein 1, transcriptional regulator [Source:HGNC Symbol;Acc:HGNC:29990]	NUPR1
rs240704	16	28518628	0.99	0.99	T	C	0.25	0.42	0.26	0.36	6.6kb 5' of IL27		rs4788084	3e-13	1.09	[1.02-1.16]	chr16_28518628_T_C_b38	chr16:28538155:28538526:clu_14274:ENSG00000176046.8	-20546	193	243	0.398361	7.06373e-10	-0.390757	0.0611906	1.39164e-05	1.52282e-18	1.93375e-10	ENSG00000176046	nuclear protein 1, transcriptional regulator [Source:HGNC Symbol;Acc:HGNC:29990]	NUPR1
rs4787458	16	28519966	0.89	0.99	A	G	0.02	0.31	0.1	0.34	7.9kb 5' of IL27		rs4788084	3e-13	1.09	[1.02-1.16]	chr16_28519966_A_G_b38	chr16:28538155:28538526:clu_14274:ENSG00000176046.8	-19208	171	209	0.342623	9.59767e-09	-0.382792	0.0647035	1.39164e-05	1.52282e-18	1.93375e-10	ENSG00000176046	nuclear protein 1, transcriptional regulator [Source:HGNC Symbol;Acc:HGNC:29990]	NUPR1
rs240702	16	28520032	0.99	1	C	T	0.26	0.41	0.26	0.36	8kb 5' of IL27		rs4788084	3e-13	1.09	[1.02-1.16]	chr16_28520032_C_T_b38	chr16:28538155:28538526:clu_14274:ENSG00000176046.8	-19142	193	244	0.4	5.56212e-10	-0.391112	0.0608479	1.39164e-05	1.52282e-18	1.93375e-10	ENSG00000176046	nuclear protein 1, transcriptional regulator [Source:HGNC Symbol;Acc:HGNC:29990]	NUPR1
rs62034319	16	28520867	0.99	1	T	G	0.25	0.41	0.26	0.36	8.8kb 5' of IL27		rs4788084	3e-13	1.09	[1.02-1.16]	chr16_28520867_T_G_b38	chr16:28538155:28538526:clu_14274:ENSG00000176046.8	-18307	193	244	0.4	1.16769e-09	-0.387336	0.0615079	1.39164e-05	1.52282e-18	1.93375e-10	ENSG00000176046	nuclear protein 1, transcriptional regulator [Source:HGNC Symbol;Acc:HGNC:29990]	NUPR1
rs28698667	16	28521750	0.99	1	C	T	0.23	0.41	0.27	0.36	9.7kb 5' of IL27		rs4788084	3e-13	1.09	[1.02-1.16]	chr16_28521750_C_T_b38	chr16:28538155:28538526:clu_14274:ENSG00000176046.8	-17424	191	239	0.391803	1.76233e-10	-0.409526	0.0618045	1.39164e-05	1.52282e-18	1.93375e-10	ENSG00000176046	nuclear protein 1, transcriptional regulator [Source:HGNC Symbol;Acc:HGNC:29990]	NUPR1
rs62034321	16	28522717	0.99	0.99	C	T	0.23	0.4	0.26	0.36	11kb 5' of IL27		rs4788084	3e-13	1.09	[1.02-1.16]	chr16_28522717_C_T_b38	chr16:28538155:28538526:clu_14274:ENSG00000176046.8	-16457	191	239	0.391803	1.76233e-10	-0.409526	0.0618045	1.39164e-05	1.52282e-18	1.93375e-10	ENSG00000176046	nuclear protein 1, transcriptional regulator [Source:HGNC Symbol;Acc:HGNC:29990]	NUPR1
rs4788085	16	28523682	0.99	1	A	G	0.32	0.42	0.26	0.36	12kb 5' of IL27		rs4788084	3e-13	1.09	[1.02-1.16]	chr16_28523682_A_G_b38	chr16:28538155:28538526:clu_14274:ENSG00000176046.8	-15492	196	247	0.404918	1.56997e-11	-0.42507	0.0604565	1.39164e-05	1.52282e-18	1.93375e-10	ENSG00000176046	nuclear protein 1, transcriptional regulator [Source:HGNC Symbol;Acc:HGNC:29990]	NUPR1
rs28772958	16	28523984	0.99	1	A	G	0.32	0.42	0.26	0.36	12kb 5' of IL27		rs4788084	3e-13	1.09	[1.02-1.16]	chr16_28523984_A_G_b38	chr16:28538155:28538526:clu_14274:ENSG00000176046.8	-15190	196	247	0.404918	1.56997e-11	-0.42507	0.0604565	1.39164e-05	1.52282e-18	1.93375e-10	ENSG00000176046	nuclear protein 1, transcriptional regulator [Source:HGNC Symbol;Acc:HGNC:29990]	NUPR1
rs62034322	16	28524513	0.9	0.99	G	A	0.21	0.32	0.1	0.34	12kb 5' of IL27		rs4788084	3e-13	1.09	[1.02-1.16]	chr16_28524513_G_A_b38	chr16:28538155:28538526:clu_14274:ENSG00000176046.8	-14661	178	219	0.359016	4.54067e-10	-0.401251	0.062084	1.39164e-05	1.52282e-18	1.93375e-10	ENSG00000176046	nuclear protein 1, transcriptional regulator [Source:HGNC Symbol;Acc:HGNC:29990]	NUPR1
rs62034323	16	28525152	0.99	1	C	T	0.22	0.41	0.26	0.36	12kb 3' of NUPR1		rs4788084	3e-13	1.09	[1.02-1.16]	chr16_28525152_C_T_b38	chr16:28538155:28538526:clu_14274:ENSG00000176046.8	-14022	191	239	0.391803	1.76233e-10	-0.409526	0.0618045	1.39164e-05	1.52282e-18	1.93375e-10	ENSG00000176046	nuclear protein 1, transcriptional regulator [Source:HGNC Symbol;Acc:HGNC:29990]	NUPR1
rs62034324	16	28525441	0.98	1	T	C	0.22	0.4	0.27	0.36	12kb 3' of NUPR1		rs4788084	3e-13	1.09	[1.02-1.16]	chr16_28525441_T_C_b38	chr16:28538155:28538526:clu_14274:ENSG00000176046.8	-13733	191	239	0.391803	1.76233e-10	-0.409526	0.0618045	1.39164e-05	1.52282e-18	1.93375e-10	ENSG00000176046	nuclear protein 1, transcriptional regulator [Source:HGNC Symbol;Acc:HGNC:29990]	NUPR1
rs2106480	16	28526650	1	1	T	C	0.32	0.42	0.26	0.36	11kb 3' of NUPR1		rs4788084	3e-13	1.09	[1.02-1.16]	chr16_28526650_T_C_b38	chr16:28538155:28538526:clu_14274:ENSG00000176046.8	-12524	196	247	0.404918	1.56997e-11	-0.42507	0.0604565	1.39164e-05	1.52282e-18	1.93375e-10	ENSG00000176046	nuclear protein 1, transcriptional regulator [Source:HGNC Symbol;Acc:HGNC:29990]	NUPR1
rs62034325	16	28527319	0.91	1	A	G	0.22	0.32	0.1	0.34	10kb 3' of NUPR1		rs4788084	3e-13	1.09	[1.02-1.16]	chr16_28527319_A_G_b38	chr16:28538155:28538526:clu_14274:ENSG00000176046.8	-11855	177	217	0.355738	5.33868e-10	-0.401637	0.0624159	1.39164e-05	1.52282e-18	1.93375e-10	ENSG00000176046	nuclear protein 1, transcriptional regulator [Source:HGNC Symbol;Acc:HGNC:29990]	NUPR1
rs62034326	16	28527972	0.99	1	A	G	0.22	0.4	0.26	0.36	9.3kb 3' of NUPR1		rs4788084	3e-13	1.09	[1.02-1.16]	chr16_28527972_A_G_b38	chr16:28538155:28538526:clu_14274:ENSG00000176046.8	-11202	191	239	0.391803	1.76233e-10	-0.409526	0.0618045	1.39164e-05	1.52282e-18	1.93375e-10	ENSG00000176046	nuclear protein 1, transcriptional regulator [Source:HGNC Symbol;Acc:HGNC:29990]	NUPR1
rs4788084	16	28528527	1	1	C	T	0.22	0.4	0.26	0.36	8.8kb 3' of NUPR1		rs4788084	3e-13	1.09	[1.02-1.16]	chr16_28528527_C_T_b38	chr16:28538155:28538526:clu_14274:ENSG00000176046.8	-10647	191	239	0.391803	1.76233e-10	-0.409526	0.0618045	1.39164e-05	1.52282e-18	1.93375e-10	ENSG00000176046	nuclear protein 1, transcriptional regulator [Source:HGNC Symbol;Acc:HGNC:29990]	NUPR1
rs8046271	16	28530073	1	1	T	C	0.21	0.41	0.27	0.36	7.2kb 3' of NUPR1		rs4788084	3e-13	1.09	[1.02-1.16]	chr16_28530073_T_C_b38	chr16:28538155:28538526:clu_14274:ENSG00000176046.8	-9101	191	239	0.391803	1.76233e-10	-0.409526	0.0618045	1.39164e-05	1.52282e-18	1.93375e-10	ENSG00000176046	nuclear protein 1, transcriptional regulator [Source:HGNC Symbol;Acc:HGNC:29990]	NUPR1
rs12446550	16	28532060	0.99	1	G	A	0.22	0.41	0.26	0.36	5.2kb 3' of NUPR1		rs4788084	3e-13	1.09	[1.02-1.16]	chr16_28532060_G_A_b38	chr16:28538155:28538526:clu_14274:ENSG00000176046.8	-7114	191	240	0.393443	6.64562e-11	-0.418138	0.0615688	1.39164e-05	1.52282e-18	1.93375e-10	ENSG00000176046	nuclear protein 1, transcriptional regulator [Source:HGNC Symbol;Acc:HGNC:29990]	NUPR1
rs4788083	16	28534128	0.99	1	A	G	0.29	0.42	0.26	0.36	3.2kb 3' of NUPR1		rs4788084	3e-13	1.09	[1.02-1.16]	chr16_28534128_A_G_b38	chr16:28538155:28538526:clu_14274:ENSG00000176046.8	-5046	196	247	0.404918	5.96714e-12	-0.43379	0.0603438	1.39164e-05	1.52282e-18	1.93375e-10	ENSG00000176046	nuclear protein 1, transcriptional regulator [Source:HGNC Symbol;Acc:HGNC:29990]	NUPR1
rs3785354	16	28539346	0.81	0.96	C	T	0.22	0.31	0.09	0.33	171bp 5' of NUPR1		rs4788084	3e-13	1.09	[1.02-1.16]	chr16_28539346_C_T_b38	chr16:28538155:28538526:clu_14274:ENSG00000176046.8	172	172	209	0.342623	4.19863e-10	-0.40806	0.0630048	1.39164e-05	1.52282e-18	1.93375e-10	ENSG00000176046	nuclear protein 1, transcriptional regulator [Source:HGNC Symbol;Acc:HGNC:29990]	NUPR1
rs1074631	16	28542787	0.8	0.96	G	A	0.11	0.31	0.09	0.33	3.6kb 5' of NUPR1		rs4788084	3e-13	1.09	[1.02-1.16]	chr16_28542787_G_A_b38	chr16:28538155:28538526:clu_14274:ENSG00000176046.8	3613	170	205	0.336066	2.23072e-09	-0.399657	0.0646486	1.39164e-05	1.52282e-18	1.93375e-10	ENSG00000176046	nuclear protein 1, transcriptional regulator [Source:HGNC Symbol;Acc:HGNC:29990]	NUPR1
rs9926245	16	28544385	0.89	0.95	T	A	0.3	0.42	0.26	0.36	5.2kb 5' of NUPR1		rs4788084	3e-13	1.09	[1.02-1.16]	chr16_28544385_T_A_b38	chr16:28538155:28538526:clu_14274:ENSG00000176046.8	5211	193	244	0.4	4.28632e-12	-0.435491	0.0601338	1.39164e-05	1.52282e-18	1.93375e-10	ENSG00000176046	nuclear protein 1, transcriptional regulator [Source:HGNC Symbol;Acc:HGNC:29990]	NUPR1
rs13331170	16	28550661	0.89	0.94	T	C	0.33	0.42	0.26	0.36	3.3kb 5' of CCDC101		rs4788084	3e-13	1.09	[1.02-1.16]	chr16_28550661_T_C_b38	chr16:28538155:28538526:clu_14274:ENSG00000176046.8	11487	193	246	0.403279	2.6668e-11	-0.415024	0.0597702	1.39164e-05	1.52282e-18	1.93375e-10	ENSG00000176046	nuclear protein 1, transcriptional regulator [Source:HGNC Symbol;Acc:HGNC:29990]	NUPR1
rs7191618	16	28554346	0.89	0.94	C	G	0.34	0.43	0.26	0.36	CCDC101	intronic	rs4788084	3e-13	1.09	[1.02-1.16]	chr16_28554346_C_G_b38	chr16:28538155:28538526:clu_14274:ENSG00000176046.8	15172	194	247	0.404918	4.12253e-11	-0.411666	0.0599109	1.39164e-05	1.52282e-18	1.93375e-10	ENSG00000176046	nuclear protein 1, transcriptional regulator [Source:HGNC Symbol;Acc:HGNC:29990]	NUPR1
rs3859172	16	28554837	0.89	0.94	G	T	0.34	0.43	0.26	0.36	CCDC101	intronic	rs4788084	3e-13	1.09	[1.02-1.16]	chr16_28554837_G_T_b38	chr16:28538155:28538526:clu_14274:ENSG00000176046.8	15663	194	247	0.404918	4.12253e-11	-0.411666	0.0599109	1.39164e-05	1.52282e-18	1.93375e-10	ENSG00000176046	nuclear protein 1, transcriptional regulator [Source:HGNC Symbol;Acc:HGNC:29990]	NUPR1
rs4788076	16	28558684	0.8	0.96	C	T	0.23	0.31	0.09	0.33	CCDC101	intronic	rs4788084	3e-13	1.09	[1.02-1.16]	chr16_28558684_C_T_b38	chr16:28538155:28538526:clu_14274:ENSG00000176046.8	19510	172	209	0.342623	4.19863e-10	-0.40806	0.0630048	1.39164e-05	1.52282e-18	1.93375e-10	ENSG00000176046	nuclear protein 1, transcriptional regulator [Source:HGNC Symbol;Acc:HGNC:29990]	NUPR1
rs9921586	16	75211105	0.99	1	G	T	0.22	0.09	0.21	0.1	3.9kb 5' of CTRB2		rs7202877	3e-15	1.28	[1.17-1.41]	chr16_75211105_G_T_b38	chr16:75204322:75205333:clu_15227:ENSG00000168928.12	3920	68	75	0.122951	2.98035e-65	1.49199	0.065872	2.31359e-05	9.3738e-117	5.25911e-63	ENSG00000168928	chymotrypsinogen B2 [Source:HGNC Symbol;Acc:HGNC:2522]	CTRB2
rs9940370	16	75212987	1	1	T	G	0.17	0.09	0.22	0.1	5.8kb 5' of CTRB2		rs7202877	3e-15	1.28	[1.17-1.41]	chr16_75212987_T_G_b38	chr16:75204322:75205333:clu_15227:ENSG00000168928.12	5802	68	75	0.122951	5.06918e-65	1.48265	0.0656514	2.31359e-05	9.3738e-117	5.25911e-63	ENSG00000168928	chymotrypsinogen B2 [Source:HGNC Symbol;Acc:HGNC:2522]	CTRB2
rs66535165	16	75213185	1	1	C	A	0.16	0.09	0.22	0.1	5.8kb 5' of CTRB1		rs7202877	3e-15	1.28	[1.17-1.41]	chr16_75213185_C_A_b38	chr16:75204322:75205333:clu_15227:ENSG00000168928.12	6000	66	73	0.119672	2.46407e-65	1.49411	0.0658964	2.31359e-05	9.3738e-117	5.25911e-63	ENSG00000168928	chymotrypsinogen B2 [Source:HGNC Symbol;Acc:HGNC:2522]	CTRB2
rs67478528	16	75213269	1	1	G	C	0.16	0.09	0.22	0.1	5.7kb 5' of CTRB1		rs7202877	3e-15	1.28	[1.17-1.41]	chr16_75213269_G_C_b38	chr16:75204322:75205333:clu_15227:ENSG00000168928.12	6084	66	73	0.119672	2.46407e-65	1.49411	0.0658964	2.31359e-05	9.3738e-117	5.25911e-63	ENSG00000168928	chymotrypsinogen B2 [Source:HGNC Symbol;Acc:HGNC:2522]	CTRB2
rs7202877	16	75213347	1	1	T	G	0.16	0.09	0.22	0.1	5.7kb 5' of CTRB1		rs7202877	3e-15	1.28	[1.17-1.41]	chr16_75213347_T_G_b38	chr16:75204322:75205333:clu_15227:ENSG00000168928.12	6162	67	74	0.121311	2.66132e-63	1.47897	0.066948	2.31359e-05	9.3738e-117	5.25911e-63	ENSG00000168928	chymotrypsinogen B2 [Source:HGNC Symbol;Acc:HGNC:2522]	CTRB2
rs7195852	16	75213360	0.94	1	G	A	0.17	0.07	0.21	0.1	5.6kb 5' of CTRB1		rs7202877	3e-15	1.28	[1.17-1.41]	chr16_75213360_G_A_b38	chr16:75204322:75205333:clu_15227:ENSG00000168928.12	6175	65	69	0.113115	1.3772e-54	1.49922	0.0763384	2.31359e-05	9.3738e-117	5.25911e-63	ENSG00000168928	chymotrypsinogen B2 [Source:HGNC Symbol;Acc:HGNC:2522]	CTRB2
rs11317724	16	75213439	1	1	GT	G	0.16	0.09	0.22	0.1	5.6kb 5' of CTRB1		rs7202877	3e-15	1.28	[1.17-1.41]	chr16_75213439_GT_G_b38	chr16:75204322:75205333:clu_15227:ENSG00000168928.12	6254	66	73	0.119672	2.46407e-65	1.49411	0.0658964	2.31359e-05	9.3738e-117	5.25911e-63	ENSG00000168928	chymotrypsinogen B2 [Source:HGNC Symbol;Acc:HGNC:2522]	CTRB2
rs7202844	16	75213493	1	1	A	G	0.21	0.09	0.22	0.1	5.5kb 5' of CTRB1		rs7202877	3e-15	1.28	[1.17-1.41]	chr16_75213493_A_G_b38	chr16:75204322:75205333:clu_15227:ENSG00000168928.12	6308	68	76	0.12459	4.16387e-64	1.44983	0.0649522	2.31359e-05	9.3738e-117	5.25911e-63	ENSG00000168928	chymotrypsinogen B2 [Source:HGNC Symbol;Acc:HGNC:2522]	CTRB2
rs7202858	16	75213512	0.99	1	A	G	0.18	0.09	0.22	0.1	5.5kb 5' of CTRB1		rs7202877	3e-15	1.28	[1.17-1.41]	chr16_75213512_A_G_b38	chr16:75204322:75205333:clu_15227:ENSG00000168928.12	6327	67	74	0.121311	1.43914e-64	1.48481	0.0661278	2.31359e-05	9.3738e-117	5.25911e-63	ENSG00000168928	chymotrypsinogen B2 [Source:HGNC Symbol;Acc:HGNC:2522]	CTRB2
rs6564232	16	75213928	1	1	C	T	0.18	0.09	0.22	0.1	5.1kb 5' of CTRB1		rs7202877	3e-15	1.28	[1.17-1.41]	chr16_75213928_C_T_b38	chr16:75204322:75205333:clu_15227:ENSG00000168928.12	6743	65	72	0.118033	4.51807e-62	1.46752	0.0674998	2.31359e-05	9.3738e-117	5.25911e-63	ENSG00000168928	chymotrypsinogen B2 [Source:HGNC Symbol;Acc:HGNC:2522]	CTRB2
rs6564233	16	75214384	1	1	C	T	0.17	0.09	0.22	0.1	4.6kb 5' of CTRB1		rs7202877	3e-15	1.28	[1.17-1.41]	chr16_75214384_C_T_b38	chr16:75204322:75205333:clu_15227:ENSG00000168928.12	7199	65	71	0.116393	5.73158e-65	1.5177	0.0672491	2.31359e-05	9.3738e-117	5.25911e-63	ENSG00000168928	chymotrypsinogen B2 [Source:HGNC Symbol;Acc:HGNC:2522]	CTRB2
rs7197746	16	75214482	1	1	A	T	0.18	0.09	0.22	0.1	4.5kb 5' of CTRB1		rs7202877	3e-15	1.28	[1.17-1.41]	chr16_75214482_A_T_b38	chr16:75204322:75205333:clu_15227:ENSG00000168928.12	7297	68	75	0.122951	1.93671e-63	1.47097	0.0664674	2.31359e-05	9.3738e-117	5.25911e-63	ENSG00000168928	chymotrypsinogen B2 [Source:HGNC Symbol;Acc:HGNC:2522]	CTRB2
rs7197389	16	75214601	1	1	C	G	0.18	0.09	0.21	0.1	4.4kb 5' of CTRB1		rs7202877	3e-15	1.28	[1.17-1.41]	chr16_75214601_C_G_b38	chr16:75204322:75205333:clu_15227:ENSG00000168928.12	7416	67	74	0.121311	3.08814e-65	1.4819	0.0654391	2.31359e-05	9.3738e-117	5.25911e-63	ENSG00000168928	chymotrypsinogen B2 [Source:HGNC Symbol;Acc:HGNC:2522]	CTRB2
rs60470336	16	75214672	1	1	A	G	0.18	0.09	0.22	0.1	4.3kb 5' of CTRB1		rs7202877	3e-15	1.28	[1.17-1.41]	chr16_75214672_A_G_b38	chr16:75204322:75205333:clu_15227:ENSG00000168928.12	7487	67	74	0.121311	3.08814e-65	1.4819	0.0654391	2.31359e-05	9.3738e-117	5.25911e-63	ENSG00000168928	chymotrypsinogen B2 [Source:HGNC Symbol;Acc:HGNC:2522]	CTRB2
rs72802372	16	75214764	1	1	G	A	0.18	0.09	0.22	0.1	4.2kb 5' of CTRB1		rs7202877	3e-15	1.28	[1.17-1.41]	chr16_75214764_G_A_b38	chr16:75204322:75205333:clu_15227:ENSG00000168928.12	7579	67	74	0.121311	3.08814e-65	1.4819	0.0654391	2.31359e-05	9.3738e-117	5.25911e-63	ENSG00000168928	chymotrypsinogen B2 [Source:HGNC Symbol;Acc:HGNC:2522]	CTRB2
rs66881382	16	75214863	1	1	C	T	0.17	0.09	0.22	0.1	4.1kb 5' of CTRB1		rs7202877	3e-15	1.28	[1.17-1.41]	chr16_75214863_C_T_b38	chr16:75204322:75205333:clu_15227:ENSG00000168928.12	7678	67	74	0.121311	3.08814e-65	1.4819	0.0654391	2.31359e-05	9.3738e-117	5.25911e-63	ENSG00000168928	chymotrypsinogen B2 [Source:HGNC Symbol;Acc:HGNC:2522]	CTRB2
rs72802375	16	75214895	1	1	G	C	0.18	0.09	0.22	0.1	4.1kb 5' of CTRB1		rs7202877	3e-15	1.28	[1.17-1.41]	chr16_75214895_G_C_b38	chr16:75204322:75205333:clu_15227:ENSG00000168928.12	7710	67	74	0.121311	3.08814e-65	1.4819	0.0654391	2.31359e-05	9.3738e-117	5.25911e-63	ENSG00000168928	chymotrypsinogen B2 [Source:HGNC Symbol;Acc:HGNC:2522]	CTRB2
rs61634868	16	75215375	1	1	G	C	0.18	0.09	0.21	0.1	3.6kb 5' of CTRB1		rs7202877	3e-15	1.28	[1.17-1.41]	chr16_75215375_G_C_b38	chr16:75204322:75205333:clu_15227:ENSG00000168928.12	8190	68	75	0.122951	3.39968e-66	1.4828	0.0646908	2.31359e-05	9.3738e-117	5.25911e-63	ENSG00000168928	chymotrypsinogen B2 [Source:HGNC Symbol;Acc:HGNC:2522]	CTRB2
rs6564234	16	75215789	1	1	G	A	0.3	0.1	0.21	0.1	3.2kb 5' of CTRB1		rs7202877	3e-15	1.28	[1.17-1.41]	chr16_75215789_G_A_b38	chr16:75204322:75205333:clu_15227:ENSG00000168928.12	8604	72	80	0.131148	2.58843e-59	1.41316	0.0674181	2.31359e-05	9.3738e-117	5.25911e-63	ENSG00000168928	chymotrypsinogen B2 [Source:HGNC Symbol;Acc:HGNC:2522]	CTRB2
rs6564235	16	75215856	0.95	1	C	T	0.17	0.09	0.22	0.11	3.1kb 5' of CTRB1		rs7202877	3e-15	1.28	[1.17-1.41]	chr16_75215856_C_T_b38	chr16:75204322:75205333:clu_15227:ENSG00000168928.12	8671	67	74	0.121311	3.08814e-65	1.4819	0.0654391	2.31359e-05	9.3738e-117	5.25911e-63	ENSG00000168928	chymotrypsinogen B2 [Source:HGNC Symbol;Acc:HGNC:2522]	CTRB2
rs6564236	16	75215993	1	1	G	C	0.18	0.09	0.22	0.1	3kb 5' of CTRB1		rs7202877	3e-15	1.28	[1.17-1.41]	chr16_75215993_G_C_b38	chr16:75204322:75205333:clu_15227:ENSG00000168928.12	8808	67	74	0.121311	3.08814e-65	1.4819	0.0654391	2.31359e-05	9.3738e-117	5.25911e-63	ENSG00000168928	chymotrypsinogen B2 [Source:HGNC Symbol;Acc:HGNC:2522]	CTRB2
rs6564237	16	75216081	1	1	C	G	0.18	0.09	0.22	0.1	2.9kb 5' of CTRB1		rs7202877	3e-15	1.28	[1.17-1.41]	chr16_75216081_C_G_b38	chr16:75204322:75205333:clu_15227:ENSG00000168928.12	8896	67	74	0.121311	3.08814e-65	1.4819	0.0654391	2.31359e-05	9.3738e-117	5.25911e-63	ENSG00000168928	chymotrypsinogen B2 [Source:HGNC Symbol;Acc:HGNC:2522]	CTRB2
rs2870463	16	75216819	1	1	G	A	0.18	0.09	0.22	0.1	2.2kb 5' of CTRB1		rs7202877	3e-15	1.28	[1.17-1.41]	chr16_75216819_G_A_b38	chr16:75204322:75205333:clu_15227:ENSG00000168928.12	9634	67	74	0.121311	3.08814e-65	1.4819	0.0654391	2.31359e-05	9.3738e-117	5.25911e-63	ENSG00000168928	chymotrypsinogen B2 [Source:HGNC Symbol;Acc:HGNC:2522]	CTRB2
rs66473537	16	75216964	1	1	G	A	0.15	0.09	0.22	0.1	2kb 5' of CTRB1		rs7202877	3e-15	1.28	[1.17-1.41]	chr16_75216964_G_A_b38	chr16:75204322:75205333:clu_15227:ENSG00000168928.12	9779	62	69	0.113115	1.36464e-70	1.53325	0.0633559	2.31359e-05	9.3738e-117	5.25911e-63	ENSG00000168928	chymotrypsinogen B2 [Source:HGNC Symbol;Acc:HGNC:2522]	CTRB2
rs8053595	16	75218205	1	1	C	T	0.18	0.09	0.21	0.1	794bp 5' of CTRB1		rs7202877	3e-15	1.28	[1.17-1.41]	chr16_75218205_C_T_b38	chr16:75204322:75205333:clu_15227:ENSG00000168928.12	11020	68	75	0.122951	1.16622e-64	1.47692	0.0656999	2.31359e-05	9.3738e-117	5.25911e-63	ENSG00000168928	chymotrypsinogen B2 [Source:HGNC Symbol;Acc:HGNC:2522]	CTRB2
rs8054218	16	75218263	1	1	A	G	0.35	0.1	0.21	0.1	736bp 5' of CTRB1		rs7202877	3e-15	1.28	[1.17-1.41]	chr16_75218263_A_G_b38	chr16:75204322:75205333:clu_15227:ENSG00000168928.12	11078	81	88	0.144262	2.52052e-58	1.42284	0.0687922	2.31359e-05	9.3738e-117	5.25911e-63	ENSG00000168928	chymotrypsinogen B2 [Source:HGNC Symbol;Acc:HGNC:2522]	CTRB2
rs2287990	16	75224719	0.94	0.99	C	T	0.12	0.08	0.27	0.1	CTRB1	synonymous	rs7202877	3e-15	1.28	[1.17-1.41]	chr16_75224719_C_T_b38	chr16:75204322:75205333:clu_15227:ENSG00000168928.12	17534	62	68	0.111475	1.62316e-70	1.56316	0.0646511	2.31359e-05	9.3738e-117	5.25911e-63	ENSG00000168928	chymotrypsinogen B2 [Source:HGNC Symbol;Acc:HGNC:2522]	CTRB2
rs13331385	16	75225320	0.94	0.99	T	A	0.27	0.09	0.28	0.1	395bp 3' of CTRB1		rs7202877	3e-15	1.28	[1.17-1.41]	chr16_75225320_T_A_b38	chr16:75204322:75205333:clu_15227:ENSG00000168928.12	18135	69	77	0.12623	3.12401e-57	1.40662	0.0690305	2.31359e-05	9.3738e-117	5.25911e-63	ENSG00000168928	chymotrypsinogen B2 [Source:HGNC Symbol;Acc:HGNC:2522]	CTRB2
rs28690217	16	75226431	0.94	0.99	G	C	0.22	0.09	0.28	0.1	1.5kb 3' of CTRB1		rs7202877	3e-15	1.28	[1.17-1.41]	chr16_75226431_G_C_b38	chr16:75204322:75205333:clu_15227:ENSG00000168928.12	19246	69	76	0.12459	8.43172e-55	1.40377	0.0712633	2.31359e-05	9.3738e-117	5.25911e-63	ENSG00000168928	chymotrypsinogen B2 [Source:HGNC Symbol;Acc:HGNC:2522]	CTRB2
rs13337017	16	75238469	0.85	0.93	C	T	0.22	0.1	0.39	0.1	BCAR1	5'-UTR	rs7202877	3e-15	1.28	[1.17-1.41]	chr16_75238469_C_T_b38	chr16:75204322:75205333:clu_15227:ENSG00000168928.12	31284	70	78	0.127869	2.05503e-54	1.37353	0.0701112	2.31359e-05	9.3738e-117	5.25911e-63	ENSG00000168928	chymotrypsinogen B2 [Source:HGNC Symbol;Acc:HGNC:2522]	CTRB2
rs8048529	16	75241732	0.85	0.93	C	T	0.22	0.1	0.38	0.1	BCAR1	intronic	rs7202877	3e-15	1.28	[1.17-1.41]	chr16_75241732_C_T_b38	chr16:75204322:75205333:clu_15227:ENSG00000168928.12	34547	69	76	0.12459	3.19112e-54	1.39124	0.0712078	2.31359e-05	9.3738e-117	5.25911e-63	ENSG00000168928	chymotrypsinogen B2 [Source:HGNC Symbol;Acc:HGNC:2522]	CTRB2
rs3826110	16	75243882	0.85	0.93	G	A	0.24	0.1	0.37	0.1	BCAR1	intronic	rs7202877	3e-15	1.28	[1.17-1.41]	chr16_75243882_G_A_b38	chr16:75204322:75205333:clu_15227:ENSG00000168928.12	36697	70	77	0.12623	1.95003e-54	1.39583	0.0712261	2.31359e-05	9.3738e-117	5.25911e-63	ENSG00000168928	chymotrypsinogen B2 [Source:HGNC Symbol;Acc:HGNC:2522]	CTRB2
rs28439846	16	75246480	0.85	0.93	G	A	0.22	0.1	0.37	0.1	BCAR1	intronic	rs7202877	3e-15	1.28	[1.17-1.41]	chr16_75246480_G_A_b38	chr16:75204322:75205333:clu_15227:ENSG00000168928.12	39295	71	78	0.127869	2.13116e-54	1.38706	0.0708176	2.31359e-05	9.3738e-117	5.25911e-63	ENSG00000168928	chymotrypsinogen B2 [Source:HGNC Symbol;Acc:HGNC:2522]	CTRB2
rs3743614	16	75247060	0.85	0.93	C	T	0.26	0.12	0.38	0.1	BCAR1	intronic	rs7202877	3e-15	1.28	[1.17-1.41]	chr16_75247060_C_T_b38	chr16:75204322:75205333:clu_15227:ENSG00000168928.12	39875	74	84	0.137705	4.00305e-47	1.26661	0.0720544	2.31359e-05	9.3738e-117	5.25911e-63	ENSG00000168928	chymotrypsinogen B2 [Source:HGNC Symbol;Acc:HGNC:2522]	CTRB2
rs28595463	16	75247337	0.85	0.93	C	T	0.22	0.1	0.37	0.1	BCAR1	intronic	rs7202877	3e-15	1.28	[1.17-1.41]	chr16_75247337_C_T_b38	chr16:75204322:75205333:clu_15227:ENSG00000168928.12	40152	71	78	0.127869	2.13116e-54	1.38706	0.0708176	2.31359e-05	9.3738e-117	5.25911e-63	ENSG00000168928	chymotrypsinogen B2 [Source:HGNC Symbol;Acc:HGNC:2522]	CTRB2
rs60879082	16	75249167	0.81	0.91	G	A	0.22	0.11	0.37	0.1	BCAR1	intronic	rs7202877	3e-15	1.28	[1.17-1.41]	chr16_75249167_G_A_b38	chr16:75204322:75205333:clu_15227:ENSG00000168928.12	41982	70	77	0.12623	1.09739e-54	1.38741	0.0705469	2.31359e-05	9.3738e-117	5.25911e-63	ENSG00000168928	chymotrypsinogen B2 [Source:HGNC Symbol;Acc:HGNC:2522]	CTRB2
rs8046145	16	75261123	0.83	0.93	G	C	0.22	0.11	0.37	0.1	BCAR1	intronic	rs7202877	3e-15	1.28	[1.17-1.41]	chr16_75261123_G_C_b38	chr16:75204322:75205333:clu_15227:ENSG00000168928.12	53938	73	79	0.129508	8.03111e-56	1.41477	0.0707995	2.31359e-05	9.3738e-117	5.25911e-63	ENSG00000168928	chymotrypsinogen B2 [Source:HGNC Symbol;Acc:HGNC:2522]	CTRB2
rs13337397	16	75261741	0.83	0.93	C	A	0.21	0.11	0.36	0.1	BCAR1	intronic	rs7202877	3e-15	1.28	[1.17-1.41]	chr16_75261741_C_A_b38	chr16:75204322:75205333:clu_15227:ENSG00000168928.12	54556	70	75	0.122951	3.3154e-55	1.44431	0.0729038	2.31359e-05	9.3738e-117	5.25911e-63	ENSG00000168928	chymotrypsinogen B2 [Source:HGNC Symbol;Acc:HGNC:2522]	CTRB2
rs8063014	16	75263775	0.83	0.93	G	A	0.2	0.11	0.37	0.1	BCAR1	intronic	rs7202877	3e-15	1.28	[1.17-1.41]	chr16_75263775_G_A_b38	chr16:75204322:75205333:clu_15227:ENSG00000168928.12	56590	70	76	0.12459	1.63533e-55	1.4226	0.0714992	2.31359e-05	9.3738e-117	5.25911e-63	ENSG00000168928	chymotrypsinogen B2 [Source:HGNC Symbol;Acc:HGNC:2522]	CTRB2
rs73605139	16	75266140	0.83	0.93	C	T	0.21	0.11	0.37	0.1	BCAR1	intronic	rs7202877	3e-15	1.28	[1.17-1.41]	chr16_75266140_C_T_b38	chr16:75204322:75205333:clu_15227:ENSG00000168928.12	58955	72	79	0.129508	2.99209e-56	1.3953	0.0694093	2.31359e-05	9.3738e-117	5.25911e-63	ENSG00000168928	chymotrypsinogen B2 [Source:HGNC Symbol;Acc:HGNC:2522]	CTRB2
rs7185352	16	75266350	0.8	0.92	G	C	0.22	0.11	0.36	0.1	BCAR1	intronic	rs7202877	3e-15	1.28	[1.17-1.41]	chr16_75266350_G_C_b38	chr16:75204322:75205333:clu_15227:ENSG00000168928.12	59165	73	80	0.131148	3.27551e-56	1.39544	0.0694543	2.31359e-05	9.3738e-117	5.25911e-63	ENSG00000168928	chymotrypsinogen B2 [Source:HGNC Symbol;Acc:HGNC:2522]	CTRB2
rs72804106	16	75268076	0.83	0.93	G	T	0.02	0.1	0.38	0.1	22bp 5' of BCAR1		rs7202877	3e-15	1.28	[1.17-1.41]	chr16_75268076_G_T_b38	chr16:75204322:75205333:clu_15227:ENSG00000168928.12	60891	58	63	0.103279	5.07853e-77	1.68569	0.0645456	2.31359e-05	9.3738e-117	5.25911e-63	ENSG00000168928	chymotrypsinogen B2 [Source:HGNC Symbol;Acc:HGNC:2522]	CTRB2
rs56787417	16	75269099	0.8	0.92	C	G	0.21	0.11	0.38	0.1	1kb 5' of BCAR1		rs7202877	3e-15	1.28	[1.17-1.41]	chr16_75269099_C_G_b38	chr16:75204322:75205333:clu_15227:ENSG00000168928.12	61914	68	74	0.121311	4.77571e-56	1.43654	0.0716632	2.31359e-05	9.3738e-117	5.25911e-63	ENSG00000168928	chymotrypsinogen B2 [Source:HGNC Symbol;Acc:HGNC:2522]	CTRB2
rs1453559	17	39864166	0.85	0.94	T	C	0.63	0.44	0.31	0.53	IKZF3	5'-UTR	rs2290400	6e-13	1.15	[1.08-1.22]	chr17_39864166_T_C_b38	chr17:39676755:39684597:clu_11371:ENSG00000161395.13	167369	223	297	0.486885	3.28933e-08	0.408756	0.0719047	2.79387e-06	3.64233e-17	1.80836e-12	ENSG00000161395	post-GPI attachment to proteins phospholipase 3 [Source:HGNC Symbol;Acc:HGNC:23719]	PGAP3
rs11655198	17	39869916	0.84	0.92	C	T	0.26	0.39	0.31	0.52	ZPBP2	intronic	rs2290400	6e-13	1.15	[1.08-1.22]	chr17_39869916_C_T_b38	chr17:39676755:39684597:clu_11371:ENSG00000161395.13	173119	217	288	0.472131	1.6628e-09	0.434066	0.0696228	2.79387e-06	3.64233e-17	1.80836e-12	ENSG00000161395	post-GPI attachment to proteins phospholipase 3 [Source:HGNC Symbol;Acc:HGNC:23719]	PGAP3
rs11650661	17	39870033	0.84	0.92	A	T	0.26	0.39	0.31	0.52	ZPBP2	intronic	rs2290400	6e-13	1.15	[1.08-1.22]	chr17_39870033_A_T_b38	chr17:39676755:39684597:clu_11371:ENSG00000161395.13	173236	217	288	0.472131	1.6628e-09	0.434066	0.0696228	2.79387e-06	3.64233e-17	1.80836e-12	ENSG00000161395	post-GPI attachment to proteins phospholipase 3 [Source:HGNC Symbol;Acc:HGNC:23719]	PGAP3
rs11655292	17	39870108	0.84	0.92	C	G	0.26	0.39	0.31	0.52	ZPBP2	intronic	rs2290400	6e-13	1.15	[1.08-1.22]	chr17_39870108_C_G_b38	chr17:39676755:39684597:clu_11371:ENSG00000161395.13	173311	217	288	0.472131	1.6628e-09	0.434066	0.0696228	2.79387e-06	3.64233e-17	1.80836e-12	ENSG00000161395	post-GPI attachment to proteins phospholipase 3 [Source:HGNC Symbol;Acc:HGNC:23719]	PGAP3
rs11557467	17	39872381	0.84	0.92	G	T	0.35	0.4	0.31	0.52	ZPBP2	missense	rs2290400	6e-13	1.15	[1.08-1.22]	chr17_39872381_G_T_b38	chr17:39676755:39684597:clu_11371:ENSG00000161395.13	175584	221	292	0.478689	3.51467e-09	0.429736	0.0704481	2.79387e-06	3.64233e-17	1.80836e-12	ENSG00000161395	post-GPI attachment to proteins phospholipase 3 [Source:HGNC Symbol;Acc:HGNC:23719]	PGAP3
rs12936231	17	39872867	0.87	0.95	C	G	0.56	0.43	0.31	0.53	ZPBP2	intronic	rs2290400	6e-13	1.15	[1.08-1.22]	chr17_39872867_C_G_b38	chr17:39676755:39684597:clu_11371:ENSG00000161395.13	176070	225	301	0.493443	1.77944e-08	0.412797	0.0711602	2.79387e-06	3.64233e-17	1.80836e-12	ENSG00000161395	post-GPI attachment to proteins phospholipase 3 [Source:HGNC Symbol;Acc:HGNC:23719]	PGAP3
rs9903250	17	39874777	0.84	0.92	G	A	0.27	0.4	0.31	0.52	ZPBP2	intronic	rs2290400	6e-13	1.15	[1.08-1.22]	chr17_39874777_G_A_b38	chr17:39676755:39684597:clu_11371:ENSG00000161395.13	177980	217	288	0.472131	1.6628e-09	0.434066	0.0696228	2.79387e-06	3.64233e-17	1.80836e-12	ENSG00000161395	post-GPI attachment to proteins phospholipase 3 [Source:HGNC Symbol;Acc:HGNC:23719]	PGAP3
rs9908132	17	39886524	0.84	0.92	T	A	0.37	0.4	0.31	0.52	8.6kb 3' of ZPBP2		rs2290400	6e-13	1.15	[1.08-1.22]	chr17_39886524_T_A_b38	chr17:39676755:39684597:clu_11371:ENSG00000161395.13	189727	221	292	0.478689	3.51467e-09	0.429736	0.0704481	2.79387e-06	3.64233e-17	1.80836e-12	ENSG00000161395	post-GPI attachment to proteins phospholipase 3 [Source:HGNC Symbol;Acc:HGNC:23719]	PGAP3
rs9901146	17	39887090	0.84	0.92	G	A	0.37	0.4	0.31	0.52	9.2kb 3' of ZPBP2		rs2290400	6e-13	1.15	[1.08-1.22]	chr17_39887090_G_A_b38	chr17:39676755:39684597:clu_11371:ENSG00000161395.13	190293	221	292	0.478689	3.51467e-09	0.429736	0.0704481	2.79387e-06	3.64233e-17	1.80836e-12	ENSG00000161395	post-GPI attachment to proteins phospholipase 3 [Source:HGNC Symbol;Acc:HGNC:23719]	PGAP3
rs12103884	17	39889472	0.84	0.92	C	T	0.37	0.4	0.31	0.52	12kb 3' of ZPBP2		rs2290400	6e-13	1.15	[1.08-1.22]	chr17_39889472_C_T_b38	chr17:39676755:39684597:clu_11371:ENSG00000161395.13	192675	221	292	0.478689	3.51467e-09	0.429736	0.0704481	2.79387e-06	3.64233e-17	1.80836e-12	ENSG00000161395	post-GPI attachment to proteins phospholipase 3 [Source:HGNC Symbol;Acc:HGNC:23719]	PGAP3
rs9906951	17	39891991	0.81	0.92	T	C	0.4	0.4	0.31	0.51	13kb 3' of GSDMB		rs2290400	6e-13	1.15	[1.08-1.22]	chr17_39891991_T_C_b38	chr17:39676755:39684597:clu_11371:ENSG00000161395.13	195194	222	294	0.481967	3.34947e-09	0.43006	0.0704006	2.79387e-06	3.64233e-17	1.80836e-12	ENSG00000161395	post-GPI attachment to proteins phospholipase 3 [Source:HGNC Symbol;Acc:HGNC:23719]	PGAP3
rs12950209	17	39892849	0.84	0.92	T	C	0.36	0.4	0.31	0.52	12kb 3' of GSDMB		rs2290400	6e-13	1.15	[1.08-1.22]	chr17_39892849_T_C_b38	chr17:39676755:39684597:clu_11371:ENSG00000161395.13	196052	221	291	0.477049	3.93177e-09	0.43078	0.0708555	2.79387e-06	3.64233e-17	1.80836e-12	ENSG00000161395	post-GPI attachment to proteins phospholipase 3 [Source:HGNC Symbol;Acc:HGNC:23719]	PGAP3
rs12950743	17	39892980	0.84	0.92	T	C	0.37	0.4	0.31	0.52	12kb 3' of GSDMB		rs2290400	6e-13	1.15	[1.08-1.22]	chr17_39892980_T_C_b38	chr17:39676755:39684597:clu_11371:ENSG00000161395.13	196183	221	292	0.478689	3.51467e-09	0.429736	0.0704481	2.79387e-06	3.64233e-17	1.80836e-12	ENSG00000161395	post-GPI attachment to proteins phospholipase 3 [Source:HGNC Symbol;Acc:HGNC:23719]	PGAP3
rs7359623	17	39893336	0.84	0.92	C	T	0.35	0.4	0.31	0.52	11kb 3' of GSDMB		rs2290400	6e-13	1.15	[1.08-1.22]	chr17_39893336_C_T_b38	chr17:39676755:39684597:clu_11371:ENSG00000161395.13	196539	220	289	0.47377	2.29736e-09	0.437596	0.0708462	2.79387e-06	3.64233e-17	1.80836e-12	ENSG00000161395	post-GPI attachment to proteins phospholipase 3 [Source:HGNC Symbol;Acc:HGNC:23719]	PGAP3
rs8067378	17	39895095	0.87	0.95	A	G	0.54	0.43	0.31	0.53	9.5kb 3' of GSDMB		rs2290400	6e-13	1.15	[1.08-1.22]	chr17_39895095_A_G_b38	chr17:39676755:39684597:clu_11371:ENSG00000161395.13	198298	226	302	0.495082	1.20683e-08	0.41839	0.0712328	2.79387e-06	3.64233e-17	1.80836e-12	ENSG00000161395	post-GPI attachment to proteins phospholipase 3 [Source:HGNC Symbol;Acc:HGNC:23719]	PGAP3
rs12453507	17	39896954	0.82	0.91	C	G	0.38	0.43	0.34	0.52	7.6kb 3' of GSDMB		rs2290400	6e-13	1.15	[1.08-1.22]	chr17_39896954_C_G_b38	chr17:39676755:39684597:clu_11371:ENSG00000161395.13	200157	213	282	0.462295	1.74996e-08	0.40577	0.069911	2.79387e-06	3.64233e-17	1.80836e-12	ENSG00000161395	post-GPI attachment to proteins phospholipase 3 [Source:HGNC Symbol;Acc:HGNC:23719]	PGAP3
rs2305479	17	39905964	0.89	0.96	C	T	0.13	0.38	0.31	0.51	GSDMB	missense	rs2290400	6e-13	1.15	[1.08-1.22]	chr17_39905964_C_T_b38	chr17:39676755:39684597:clu_11371:ENSG00000161395.13	209167	207	268	0.439344	6.68186e-09	0.43864	0.0733159	2.79387e-06	3.64233e-17	1.80836e-12	ENSG00000161395	post-GPI attachment to proteins phospholipase 3 [Source:HGNC Symbol;Acc:HGNC:23719]	PGAP3
rs883770	17	39907128	0.89	0.96	C	T	0.13	0.37	0.31	0.51	GSDMB	intronic	rs2290400	6e-13	1.15	[1.08-1.22]	chr17_39907128_C_T_b38	chr17:39676755:39684597:clu_11371:ENSG00000161395.13	210331	207	268	0.439344	6.68186e-09	0.43864	0.0733159	2.79387e-06	3.64233e-17	1.80836e-12	ENSG00000161395	post-GPI attachment to proteins phospholipase 3 [Source:HGNC Symbol;Acc:HGNC:23719]	PGAP3
rs62067034	17	39907485	0.88	0.96	C	T	0.13	0.37	0.31	0.51	GSDMB	intronic	rs2290400	6e-13	1.15	[1.08-1.22]	chr17_39907485_C_T_b38	chr17:39676755:39684597:clu_11371:ENSG00000161395.13	210688	207	268	0.439344	6.68186e-09	0.43864	0.0733159	2.79387e-06	3.64233e-17	1.80836e-12	ENSG00000161395	post-GPI attachment to proteins phospholipase 3 [Source:HGNC Symbol;Acc:HGNC:23719]	PGAP3
rs36000226	17	39907676	0.89	0.96	T	C	0.13	0.37	0.31	0.51	GSDMB	intronic	rs2290400	6e-13	1.15	[1.08-1.22]	chr17_39907676_T_C_b38	chr17:39676755:39684597:clu_11371:ENSG00000161395.13	210879	207	268	0.439344	6.68186e-09	0.43864	0.0733159	2.79387e-06	3.64233e-17	1.80836e-12	ENSG00000161395	post-GPI attachment to proteins phospholipase 3 [Source:HGNC Symbol;Acc:HGNC:23719]	PGAP3
rs36084703	17	39907727	0.83	0.96	CA	C	0.13	0.37	0.3	0.49	GSDMB	intronic	rs2290400	6e-13	1.15	[1.08-1.22]	chr17_39907727_CA_C_b38	chr17:39676755:39684597:clu_11371:ENSG00000161395.13	210930	207	268	0.439344	6.68186e-09	0.43864	0.0733159	2.79387e-06	3.64233e-17	1.80836e-12	ENSG00000161395	post-GPI attachment to proteins phospholipase 3 [Source:HGNC Symbol;Acc:HGNC:23719]	PGAP3
rs2290400	17	39909987	1	1	T	C	0.49	0.42	0.33	0.52	GSDMB	intronic	rs2290400	6e-13	1.15	[1.08-1.22]	chr17_39909987_T_C_b38	chr17:39676755:39684597:clu_11371:ENSG00000161395.13	213190	224	302	0.495082	9.8696e-09	0.414667	0.0701527	2.79387e-06	3.64233e-17	1.80836e-12	ENSG00000161395	post-GPI attachment to proteins phospholipase 3 [Source:HGNC Symbol;Acc:HGNC:23719]	PGAP3
rs1008723	17	39910014	0.96	1	G	T	0.25	0.39	0.31	0.51	GSDMB	intronic	rs2290400	6e-13	1.15	[1.08-1.22]	chr17_39910014_G_T_b38	chr17:39676755:39684597:clu_11371:ENSG00000161395.13	213217	215	285	0.467213	1.24219e-09	0.437049	0.0695231	2.79387e-06	3.64233e-17	1.80836e-12	ENSG00000161395	post-GPI attachment to proteins phospholipase 3 [Source:HGNC Symbol;Acc:HGNC:23719]	PGAP3
rs56380902	17	39910119	0.99	1	T	C	0.47	0.42	0.32	0.52	GSDMB	intronic	rs2290400	6e-13	1.15	[1.08-1.22]	chr17_39910119_T_C_b38	chr17:39676755:39684597:clu_11371:ENSG00000161395.13	213322	223	298	0.488525	7.37617e-09	0.419683	0.0703612	2.79387e-06	3.64233e-17	1.80836e-12	ENSG00000161395	post-GPI attachment to proteins phospholipase 3 [Source:HGNC Symbol;Acc:HGNC:23719]	PGAP3
rs4795400	17	39910767	0.81	0.99	C	T	0.12	0.35	0.32	0.47	GSDMB	intronic	rs2290400	6e-13	1.15	[1.08-1.22]	chr17_39910767_C_T_b38	chr17:39676755:39684597:clu_11371:ENSG00000161395.13	213970	194	245	0.401639	1.07933e-08	0.432679	0.073406	2.79387e-06	3.64233e-17	1.80836e-12	ENSG00000161395	post-GPI attachment to proteins phospholipase 3 [Source:HGNC Symbol;Acc:HGNC:23719]	PGAP3
rs4795401	17	39911280	0.92	0.99	A	G	0.21	0.37	0.32	0.5	GSDMB	intronic	rs2290400	6e-13	1.15	[1.08-1.22]	chr17_39911280_A_G_b38	chr17:39676755:39684597:clu_11371:ENSG00000161395.13	214483	215	283	0.463934	1.22408e-09	0.44152	0.0702052	2.79387e-06	3.64233e-17	1.80836e-12	ENSG00000161395	post-GPI attachment to proteins phospholipase 3 [Source:HGNC Symbol;Acc:HGNC:23719]	PGAP3
rs869402	17	39911790	0.91	-0.96	T	C	0.85	0.62	0.68	0.48	GSDMB	intronic	rs2290400	6e-13	1.15	[1.08-1.22]	chr17_39911790_T_C_b38	chr17:39676755:39684597:clu_11371:ENSG00000161395.13	214993	212	275	0.45082	1.42206e-08	-0.42639	0.072975	2.79387e-06	3.64233e-17	1.80836e-12	ENSG00000161395	post-GPI attachment to proteins phospholipase 3 [Source:HGNC Symbol;Acc:HGNC:23719]	PGAP3
rs1011082	17	39912261	0.91	-0.96	T	C	0.71	0.61	0.68	0.48	GSDMB	intronic	rs2290400	6e-13	1.15	[1.08-1.22]	chr17_39912261_T_C_b38	chr17:39676755:39684597:clu_11371:ENSG00000161395.13	215464	217	285	0.467213	1.0798e-08	-0.418396	0.070984	2.79387e-06	3.64233e-17	1.80836e-12	ENSG00000161395	post-GPI attachment to proteins phospholipase 3 [Source:HGNC Symbol;Acc:HGNC:23719]	PGAP3
rs921650	17	39912823	0.92	-0.96	G	A	0.84	0.62	0.68	0.48	GSDMB	intronic	rs2290400	6e-13	1.15	[1.08-1.22]	chr17_39912823_G_A_b38	chr17:39676755:39684597:clu_11371:ENSG00000161395.13	216026	213	276	0.452459	4.38252e-08	-0.411601	0.0731115	2.79387e-06	3.64233e-17	1.80836e-12	ENSG00000161395	post-GPI attachment to proteins phospholipase 3 [Source:HGNC Symbol;Acc:HGNC:23719]	PGAP3
rs921649	17	39913021	0.92	-0.96	C	T	0.83	0.62	0.68	0.48	GSDMB	intronic	rs2290400	6e-13	1.15	[1.08-1.22]	chr17_39913021_C_T_b38	chr17:39676755:39684597:clu_11371:ENSG00000161395.13	216224	213	276	0.452459	4.38252e-08	-0.411601	0.0731115	2.79387e-06	3.64233e-17	1.80836e-12	ENSG00000161395	post-GPI attachment to proteins phospholipase 3 [Source:HGNC Symbol;Acc:HGNC:23719]	PGAP3
rs6503524	17	39913556	0.92	-0.96	C	G,T	0.84	0.62	0.68	0.48	GSDMB	intronic	rs2290400	6e-13	1.15	[1.08-1.22]	chr17_39913556_C_T_b38	chr17:39676755:39684597:clu_11371:ENSG00000161395.13	216759	213	276	0.452459	4.38252e-08	-0.411601	0.0731115	2.79387e-06	3.64233e-17	1.80836e-12	ENSG00000161395	post-GPI attachment to proteins phospholipase 3 [Source:HGNC Symbol;Acc:HGNC:23719]	PGAP3
rs7216389	17	39913696	0.92	-0.96	C	T	0.83	0.62	0.68	0.48	GSDMB	intronic	rs2290400	6e-13	1.15	[1.08-1.22]	chr17_39913696_C_T_b38	chr17:39676755:39684597:clu_11371:ENSG00000161395.13	216899	213	276	0.452459	4.38252e-08	-0.411601	0.0731115	2.79387e-06	3.64233e-17	1.80836e-12	ENSG00000161395	post-GPI attachment to proteins phospholipase 3 [Source:HGNC Symbol;Acc:HGNC:23719]	PGAP3
rs7216558	17	39913818	0.95	-0.99	C	T	0.53	0.57	0.68	0.47	GSDMB	intronic	rs2290400	6e-13	1.15	[1.08-1.22]	chr17_39913818_C_T_b38	chr17:39676755:39684597:clu_11371:ENSG00000161395.13	217021	225	300	0.491803	2.21164e-08	-0.409684	0.0711257	2.79387e-06	3.64233e-17	1.80836e-12	ENSG00000161395	post-GPI attachment to proteins phospholipase 3 [Source:HGNC Symbol;Acc:HGNC:23719]	PGAP3
rs7221605	17	39914536	0.85	-0.93	C	T	0.82	0.63	0.68	0.48	GSDMB	intronic	rs2290400	6e-13	1.15	[1.08-1.22]	chr17_39914536_C_T_b38	chr17:39676755:39684597:clu_11371:ENSG00000161395.13	217739	211	269	0.440984	4.20987e-08	-0.419845	0.0744738	2.79387e-06	3.64233e-17	1.80836e-12	ENSG00000161395	post-GPI attachment to proteins phospholipase 3 [Source:HGNC Symbol;Acc:HGNC:23719]	PGAP3
rs1031458	17	39915920	0.86	-0.96	G	T	0.85	0.64	0.68	0.49	GSDMB	intronic	rs2290400	6e-13	1.15	[1.08-1.22]	chr17_39915920_G_T_b38	chr17:39676755:39684597:clu_11371:ENSG00000161395.13	219123	210	267	0.439145	2.52973e-08	-0.427013	0.0744627	2.79387e-06	3.64233e-17	1.80836e-12	ENSG00000161395	post-GPI attachment to proteins phospholipase 3 [Source:HGNC Symbol;Acc:HGNC:23719]	PGAP3
rs1031460	17	39915994	0.86	-0.96	T	G	0.84	0.64	0.68	0.49	GSDMB	intronic	rs2290400	6e-13	1.15	[1.08-1.22]	chr17_39915994_T_G_b38	chr17:39676755:39684597:clu_11371:ENSG00000161395.13	219197	210	268	0.439344	4.38877e-08	-0.417311	0.0741293	2.79387e-06	3.64233e-17	1.80836e-12	ENSG00000161395	post-GPI attachment to proteins phospholipase 3 [Source:HGNC Symbol;Acc:HGNC:23719]	PGAP3
rs8065777	17	39916149	0.86	-0.95	C	T	0.84	0.64	0.68	0.49	GSDMB	intronic	rs2290400	6e-13	1.15	[1.08-1.22]	chr17_39916149_C_T_b38	chr17:39676755:39684597:clu_11371:ENSG00000161395.13	219352	211	269	0.440984	4.20987e-08	-0.419845	0.0744738	2.79387e-06	3.64233e-17	1.80836e-12	ENSG00000161395	post-GPI attachment to proteins phospholipase 3 [Source:HGNC Symbol;Acc:HGNC:23719]	PGAP3
rs9303280	17	39917778	0.84	-0.94	T	C	0.77	0.63	0.68	0.49	GSDMB	intronic	rs2290400	6e-13	1.15	[1.08-1.22]	chr17_39917778_T_C_b38	chr17:39676755:39684597:clu_11371:ENSG00000161395.13	220981	215	279	0.457377	7.25501e-09	-0.428819	0.0718562	2.79387e-06	3.64233e-17	1.80836e-12	ENSG00000161395	post-GPI attachment to proteins phospholipase 3 [Source:HGNC Symbol;Acc:HGNC:23719]	PGAP3
rs9303281	17	39917793	0.91	-0.97	G	A	0.44	0.57	0.68	0.47	GSDMB	intronic	rs2290400	6e-13	1.15	[1.08-1.22]	chr17_39917793_G_A_b38	chr17:39676755:39684597:clu_11371:ENSG00000161395.13	220996	227	303	0.496721	3.12284e-08	-0.406569	0.0713957	2.79387e-06	3.64233e-17	1.80836e-12	ENSG00000161395	post-GPI attachment to proteins phospholipase 3 [Source:HGNC Symbol;Acc:HGNC:23719]	PGAP3
rs7219923	17	39918265	0.92	-0.97	C	T	0.53	0.58	0.68	0.47	GSDMB	intronic	rs2290400	6e-13	1.15	[1.08-1.22]	chr17_39918265_C_T_b38	chr17:39676755:39684597:clu_11371:ENSG00000161395.13	221468	225	300	0.491803	2.21164e-08	-0.409684	0.0711257	2.79387e-06	3.64233e-17	1.80836e-12	ENSG00000161395	post-GPI attachment to proteins phospholipase 3 [Source:HGNC Symbol;Acc:HGNC:23719]	PGAP3
rs7224129	17	39919173	0.92	-0.97	G	A	0.53	0.57	0.67	0.47	GSDMB		rs2290400	6e-13	1.15	[1.08-1.22]	chr17_39919173_G_A_b38	chr17:39676755:39684597:clu_11371:ENSG00000161395.13	222376	225	300	0.491803	2.21164e-08	-0.409684	0.0711257	2.79387e-06	3.64233e-17	1.80836e-12	ENSG00000161395	post-GPI attachment to proteins phospholipase 3 [Source:HGNC Symbol;Acc:HGNC:23719]	PGAP3
rs8074437	17	39919884	0.92	-0.97	T	G	0.53	0.57	0.68	0.47	GSDMB		rs2290400	6e-13	1.15	[1.08-1.22]	chr17_39919884_T_G_b38	chr17:39676755:39684597:clu_11371:ENSG00000161395.13	223087	225	301	0.493443	2.76424e-08	-0.40634	0.0710661	2.79387e-06	3.64233e-17	1.80836e-12	ENSG00000161395	post-GPI attachment to proteins phospholipase 3 [Source:HGNC Symbol;Acc:HGNC:23719]	PGAP3
rs71971950	17	39919945	0.89	-0.97	TATA	T	0.53	0.56	0.68	0.47	GSDMB		rs2290400	6e-13	1.15	[1.08-1.22]	chr17_39919945_TATA_T_b38	chr17:39676755:39684597:clu_11371:ENSG00000161395.13	223148	222	298	0.493377	2.7519e-08	-0.406393	0.0710648	2.79387e-06	3.64233e-17	1.80836e-12	ENSG00000161395	post-GPI attachment to proteins phospholipase 3 [Source:HGNC Symbol;Acc:HGNC:23719]	PGAP3
rs4065275	17	39924612	0.86	-0.94	A	G,T	0.62	0.6	0.67	0.49	ORMDL3	intronic	rs2290400	6e-13	1.15	[1.08-1.22]	chr17_39924612_A_G_b38	chr17:39676755:39684597:clu_11371:ENSG00000161395.13	227815	212	274	0.44918	1.91992e-07	-0.390728	0.0731631	2.79387e-06	3.64233e-17	1.80836e-12	ENSG00000161395	post-GPI attachment to proteins phospholipase 3 [Source:HGNC Symbol;Acc:HGNC:23719]	PGAP3
rs12603332	17	39926554	0.85	-0.94	T	C	0.34	0.57	0.67	0.49	ORMDL3	intronic	rs2290400	6e-13	1.15	[1.08-1.22]	chr17_39926554_T_C_b38	chr17:39676755:39684597:clu_11371:ENSG00000161395.13	229757	220	294	0.481967	6.5801e-07	-0.368268	0.0723518	2.79387e-06	3.64233e-17	1.80836e-12	ENSG00000161395	post-GPI attachment to proteins phospholipase 3 [Source:HGNC Symbol;Acc:HGNC:23719]	PGAP3
rs402072	19	46715865	0.93	1	T	C	0.06	0.11	0.12	0.17	PRKD2	intronic	rs425105	3e-11	1.16	[1.08-1.27]	chr19_46715865_T_C_b38	chr19:46748717:46755412:clu_21354:ENSG00000181027.10	-30181	64	70	0.114754	1.45651e-06	0.570098	0.115798	4.41093e-06	1.9064e-20	1.55131e-13	ENSG00000181027	fukutin related protein [Source:HGNC Symbol;Acc:HGNC:17997]	FKRP
rs313839	19	46718300	0.93	1	C	G	0.08	0.11	0.12	0.17	1.2kb 5' of PRKD2		rs425105	3e-11	1.16	[1.08-1.27]	chr19_46718300_C_G_b38	chr19:46748717:46755412:clu_21354:ENSG00000181027.10	-27746	66	72	0.118033	9.38741e-07	0.572972	0.114231	4.41093e-06	1.9064e-20	1.55131e-13	ENSG00000181027	fukutin related protein [Source:HGNC Symbol;Acc:HGNC:17997]	FKRP
rs9268528	6	32415331	0.8	0.9	A	G	0.2	0.43	0.45	0.37	3.6kb 5' of BTNL2		rs9268645	1e-100	NA		chr6_32415331_A_G_b38	chr6:32442693:32443185:clu_29095:ENSG00000204287.13	-24511	188	239	0.391803	3.37525e-05	0.327817	0.077776	3.90928e-05	7.7679e-13	6.71752e-05	ENSG00000204287	major histocompatibility complex, class II, DR alpha [Source:HGNC Symbol;Acc:HGNC:4947]	HLA-DRA
rs9268568	6	32423127	0.98	0.99	G	A	0.23	0.41	0.46	0.37	11kb 5' of BTNL2		rs9268645	1e-100	NA		chr6_32423127_G_A_b38	chr6:32442693:32443185:clu_29095:ENSG00000204287.13	-16715	203	258	0.422951	3.7143e-07	0.390007	0.0748945	3.90928e-05	7.7679e-13	6.71752e-05	ENSG00000204287	major histocompatibility complex, class II, DR alpha [Source:HGNC Symbol;Acc:HGNC:4947]	HLA-DRA
rs2157332	6	32424884	0.99	1	C	T	0.23	0.41	0.46	0.37	13kb 5' of BTNL2		rs9268645	1e-100	NA		chr6_32424884_C_T_b38	chr6:32442693:32443185:clu_29095:ENSG00000204287.13	-14958	204	259	0.42459	1.23294e-06	0.374577	0.0755419	3.90928e-05	7.7679e-13	6.71752e-05	ENSG00000204287	major histocompatibility complex, class II, DR alpha [Source:HGNC Symbol;Acc:HGNC:4947]	HLA-DRA
rs2187818	6	32427791	0.99	1	G	T	0.23	0.41	0.46	0.37	12kb 5' of HLA-DRA		rs9268645	1e-100	NA		chr6_32427791_G_T_b38	chr6:32442693:32443185:clu_29095:ENSG00000204287.13	-12051	204	259	0.42459	1.23294e-06	0.374577	0.0755419	3.90928e-05	7.7679e-13	6.71752e-05	ENSG00000204287	major histocompatibility complex, class II, DR alpha [Source:HGNC Symbol;Acc:HGNC:4947]	HLA-DRA
rs9268578	6	32428280	0.99	1	A	G	0.23	0.41	0.46	0.37	12kb 5' of HLA-DRA		rs9268645	1e-100	NA		chr6_32428280_A_G_b38	chr6:32442693:32443185:clu_29095:ENSG00000204287.13	-11562	204	259	0.42459	1.23294e-06	0.374577	0.0755419	3.90928e-05	7.7679e-13	6.71752e-05	ENSG00000204287	major histocompatibility complex, class II, DR alpha [Source:HGNC Symbol;Acc:HGNC:4947]	HLA-DRA
rs9268579	6	32428673	0.99	1	G	A	0.23	0.41	0.46	0.37	11kb 5' of HLA-DRA		rs9268645	1e-100	NA		chr6_32428673_G_A_b38	chr6:32442693:32443185:clu_29095:ENSG00000204287.13	-11169	204	259	0.42459	1.23294e-06	0.374577	0.0755419	3.90928e-05	7.7679e-13	6.71752e-05	ENSG00000204287	major histocompatibility complex, class II, DR alpha [Source:HGNC Symbol;Acc:HGNC:4947]	HLA-DRA
rs9268580	6	32429128	0.99	1	G	C	0.23	0.41	0.46	0.37	11kb 5' of HLA-DRA		rs9268645	1e-100	NA		chr6_32429128_G_C_b38	chr6:32442693:32443185:clu_29095:ENSG00000204287.13	-10714	204	259	0.42459	1.23294e-06	0.374577	0.0755419	3.90928e-05	7.7679e-13	6.71752e-05	ENSG00000204287	major histocompatibility complex, class II, DR alpha [Source:HGNC Symbol;Acc:HGNC:4947]	HLA-DRA
rs9268582	6	32429187	0.99	1	C	T	0.23	0.41	0.46	0.37	11kb 5' of HLA-DRA		rs9268645	1e-100	NA		chr6_32429187_C_T_b38	chr6:32442693:32443185:clu_29095:ENSG00000204287.13	-10655	204	260	0.42623	1.4305e-06	0.370739	0.0752458	3.90928e-05	7.7679e-13	6.71752e-05	ENSG00000204287	major histocompatibility complex, class II, DR alpha [Source:HGNC Symbol;Acc:HGNC:4947]	HLA-DRA
rs9268583	6	32429489	0.99	1	T	G	0.23	0.41	0.46	0.37	10kb 5' of HLA-DRA		rs9268645	1e-100	NA		chr6_32429489_T_G_b38	chr6:32442693:32443185:clu_29095:ENSG00000204287.13	-10353	204	259	0.42459	1.23294e-06	0.374577	0.0755419	3.90928e-05	7.7679e-13	6.71752e-05	ENSG00000204287	major histocompatibility complex, class II, DR alpha [Source:HGNC Symbol;Acc:HGNC:4947]	HLA-DRA
rs9268585	6	32429626	0.99	1	T	G	0.23	0.41	0.46	0.37	10kb 5' of HLA-DRA		rs9268645	1e-100	NA		chr6_32429626_T_G_b38	chr6:32442693:32443185:clu_29095:ENSG00000204287.13	-10216	204	259	0.42459	1.23294e-06	0.374577	0.0755419	3.90928e-05	7.7679e-13	6.71752e-05	ENSG00000204287	major histocompatibility complex, class II, DR alpha [Source:HGNC Symbol;Acc:HGNC:4947]	HLA-DRA
rs9268588	6	32430017	1	1	C	G	0.3	0.42	0.54	0.37	9.8kb 5' of HLA-DRA		rs9268645	1e-100	NA		chr6_32430017_C_G_b38	chr6:32442693:32443185:clu_29095:ENSG00000204287.13	-9825	209	270	0.442623	1.79562e-05	0.32997	0.0756064	3.90928e-05	7.7679e-13	6.71752e-05	ENSG00000204287	major histocompatibility complex, class II, DR alpha [Source:HGNC Symbol;Acc:HGNC:4947]	HLA-DRA
rs9268589	6	32430425	1	1	G	A	0.3	0.42	0.54	0.37	9.4kb 5' of HLA-DRA		rs9268645	1e-100	NA		chr6_32430425_G_A_b38	chr6:32442693:32443185:clu_29095:ENSG00000204287.13	-9417	209	270	0.442623	1.79562e-05	0.32997	0.0756064	3.90928e-05	7.7679e-13	6.71752e-05	ENSG00000204287	major histocompatibility complex, class II, DR alpha [Source:HGNC Symbol;Acc:HGNC:4947]	HLA-DRA
rs7774047	6	32430786	1	1	C	A	0.3	0.42	0.54	0.37	9.1kb 5' of HLA-DRA		rs9268645	1e-100	NA		chr6_32430786_C_A_b38	chr6:32442693:32443185:clu_29095:ENSG00000204287.13	-9056	209	270	0.442623	1.79562e-05	0.32997	0.0756064	3.90928e-05	7.7679e-13	6.71752e-05	ENSG00000204287	major histocompatibility complex, class II, DR alpha [Source:HGNC Symbol;Acc:HGNC:4947]	HLA-DRA
rs7756262	6	32430898	1	1	T	A	0.3	0.42	0.54	0.37	8.9kb 5' of HLA-DRA		rs9268645	1e-100	NA		chr6_32430898_T_A_b38	chr6:32442693:32443185:clu_29095:ENSG00000204287.13	-8944	209	270	0.442623	1.79562e-05	0.32997	0.0756064	3.90928e-05	7.7679e-13	6.71752e-05	ENSG00000204287	major histocompatibility complex, class II, DR alpha [Source:HGNC Symbol;Acc:HGNC:4947]	HLA-DRA
rs4348358	6	32431315	1	1	G	A	0.3	0.42	0.54	0.37	8.5kb 5' of HLA-DRA		rs9268645	1e-100	NA		chr6_32431315_G_A_b38	chr6:32442693:32443185:clu_29095:ENSG00000204287.13	-8527	209	270	0.442623	1.79562e-05	0.32997	0.0756064	3.90928e-05	7.7679e-13	6.71752e-05	ENSG00000204287	major histocompatibility complex, class II, DR alpha [Source:HGNC Symbol;Acc:HGNC:4947]	HLA-DRA
rs9268605	6	32432056	0.99	1	G	A	0.3	0.42	0.54	0.37	7.8kb 5' of HLA-DRA		rs9268645	1e-100	NA		chr6_32432056_G_A_b38	chr6:32442693:32443185:clu_29095:ENSG00000204287.13	-7786	209	270	0.442623	1.79562e-05	0.32997	0.0756064	3.90928e-05	7.7679e-13	6.71752e-05	ENSG00000204287	major histocompatibility complex, class II, DR alpha [Source:HGNC Symbol;Acc:HGNC:4947]	HLA-DRA
rs9268606	6	32432293	1	1	G	A	0.3	0.42	0.54	0.37	7.5kb 5' of HLA-DRA		rs9268645	1e-100	NA		chr6_32432293_G_A_b38	chr6:32442693:32443185:clu_29095:ENSG00000204287.13	-7549	209	270	0.442623	1.79562e-05	0.32997	0.0756064	3.90928e-05	7.7679e-13	6.71752e-05	ENSG00000204287	major histocompatibility complex, class II, DR alpha [Source:HGNC Symbol;Acc:HGNC:4947]	HLA-DRA
rs9268607	6	32432761	1	1	A	G	0.3	0.42	0.54	0.37	7.1kb 5' of HLA-DRA		rs9268645	1e-100	NA		chr6_32432761_A_G_b38	chr6:32442693:32443185:clu_29095:ENSG00000204287.13	-7081	209	270	0.442623	1.79562e-05	0.32997	0.0756064	3.90928e-05	7.7679e-13	6.71752e-05	ENSG00000204287	major histocompatibility complex, class II, DR alpha [Source:HGNC Symbol;Acc:HGNC:4947]	HLA-DRA
rs9268608	6	32433088	1	1	C	T	0.3	0.42	0.54	0.37	6.8kb 5' of HLA-DRA		rs9268645	1e-100	NA		chr6_32433088_C_T_b38	chr6:32442693:32443185:clu_29095:ENSG00000204287.13	-6754	209	270	0.442623	1.79562e-05	0.32997	0.0756064	3.90928e-05	7.7679e-13	6.71752e-05	ENSG00000204287	major histocompatibility complex, class II, DR alpha [Source:HGNC Symbol;Acc:HGNC:4947]	HLA-DRA
rs9268609	6	32433484	0.99	1	G	A	0.3	0.42	0.54	0.37	6.4kb 5' of HLA-DRA		rs9268645	1e-100	NA		chr6_32433484_G_A_b38	chr6:32442693:32443185:clu_29095:ENSG00000204287.13	-6358	209	270	0.442623	1.79562e-05	0.32997	0.0756064	3.90928e-05	7.7679e-13	6.71752e-05	ENSG00000204287	major histocompatibility complex, class II, DR alpha [Source:HGNC Symbol;Acc:HGNC:4947]	HLA-DRA
rs9268610	6	32433486	0.99	1	T	C	0.3	0.42	0.54	0.37	6.4kb 5' of HLA-DRA		rs9268645	1e-100	NA		chr6_32433486_T_C_b38	chr6:32442693:32443185:clu_29095:ENSG00000204287.13	-6356	209	270	0.442623	1.79562e-05	0.32997	0.0756064	3.90928e-05	7.7679e-13	6.71752e-05	ENSG00000204287	major histocompatibility complex, class II, DR alpha [Source:HGNC Symbol;Acc:HGNC:4947]	HLA-DRA
rs1987305	6	32434219	1	1	G	T	0.3	0.42	0.54	0.37	5.6kb 5' of HLA-DRA		rs9268645	1e-100	NA		chr6_32434219_G_T_b38	chr6:32442693:32443185:clu_29095:ENSG00000204287.13	-5623	209	270	0.442623	1.79562e-05	0.32997	0.0756064	3.90928e-05	7.7679e-13	6.71752e-05	ENSG00000204287	major histocompatibility complex, class II, DR alpha [Source:HGNC Symbol;Acc:HGNC:4947]	HLA-DRA
rs960736	6	32434448	1	1	T	C	0.3	0.42	0.54	0.37	5.4kb 5' of HLA-DRA		rs9268645	1e-100	NA		chr6_32434448_T_C_b38	chr6:32442693:32443185:clu_29095:ENSG00000204287.13	-5394	209	270	0.442623	1.79562e-05	0.32997	0.0756064	3.90928e-05	7.7679e-13	6.71752e-05	ENSG00000204287	major histocompatibility complex, class II, DR alpha [Source:HGNC Symbol;Acc:HGNC:4947]	HLA-DRA
rs7753264	6	32434663	1	1	A	G	0.3	0.42	0.54	0.37	5.2kb 5' of HLA-DRA		rs9268645	1e-100	NA		chr6_32434663_A_G_b38	chr6:32442693:32443185:clu_29095:ENSG00000204287.13	-5179	209	270	0.442623	1.79562e-05	0.32997	0.0756064	3.90928e-05	7.7679e-13	6.71752e-05	ENSG00000204287	major histocompatibility complex, class II, DR alpha [Source:HGNC Symbol;Acc:HGNC:4947]	HLA-DRA
rs7773756	6	32434687	1	1	T	C	0.3	0.42	0.54	0.37	5.2kb 5' of HLA-DRA		rs9268645	1e-100	NA		chr6_32434687_T_C_b38	chr6:32442693:32443185:clu_29095:ENSG00000204287.13	-5155	209	270	0.442623	1.79562e-05	0.32997	0.0756064	3.90928e-05	7.7679e-13	6.71752e-05	ENSG00000204287	major histocompatibility complex, class II, DR alpha [Source:HGNC Symbol;Acc:HGNC:4947]	HLA-DRA
rs9268613	6	32434915	1	1	C	T	0.3	0.42	0.54	0.37	4.9kb 5' of HLA-DRA		rs9268645	1e-100	NA		chr6_32434915_C_T_b38	chr6:32442693:32443185:clu_29095:ENSG00000204287.13	-4927	209	270	0.442623	1.79562e-05	0.32997	0.0756064	3.90928e-05	7.7679e-13	6.71752e-05	ENSG00000204287	major histocompatibility complex, class II, DR alpha [Source:HGNC Symbol;Acc:HGNC:4947]	HLA-DRA
rs9268615	6	32435112	1	1	G	A	0.3	0.42	0.54	0.37	4.7kb 5' of HLA-DRA		rs9268645	1e-100	NA		chr6_32435112_G_A_b38	chr6:32442693:32443185:clu_29095:ENSG00000204287.13	-4730	211	272	0.445902	1.13399e-05	0.339715	0.075988	3.90928e-05	7.7679e-13	6.71752e-05	ENSG00000204287	major histocompatibility complex, class II, DR alpha [Source:HGNC Symbol;Acc:HGNC:4947]	HLA-DRA
rs4612206	6	32436316	1	1	C	T	0.3	0.42	0.54	0.37	3.5kb 5' of HLA-DRA		rs9268645	1e-100	NA		chr6_32436316_C_T_b38	chr6:32442693:32443185:clu_29095:ENSG00000204287.13	-3526	209	270	0.442623	1.79562e-05	0.32997	0.0756064	3.90928e-05	7.7679e-13	6.71752e-05	ENSG00000204287	major histocompatibility complex, class II, DR alpha [Source:HGNC Symbol;Acc:HGNC:4947]	HLA-DRA
rs9268634	6	32438753	0.99	1	G	A	0.3	0.42	0.54	0.37	1.1kb 5' of HLA-DRA		rs9268645	1e-100	NA		chr6_32438753_G_A_b38	chr6:32442693:32443185:clu_29095:ENSG00000204287.13	-1089	209	270	0.442623	1.79562e-05	0.32997	0.0756064	3.90928e-05	7.7679e-13	6.71752e-05	ENSG00000204287	major histocompatibility complex, class II, DR alpha [Source:HGNC Symbol;Acc:HGNC:4947]	HLA-DRA
rs3763322	6	32439030	0.96	0.99	G	A	0.27	0.45	0.46	0.38	811bp 5' of HLA-DRA		rs9268645	1e-100	NA		chr6_32439030_G_A_b38	chr6:32442693:32443185:clu_29095:ENSG00000204287.13	-812	207	265	0.434426	1.61648e-06	0.371322	0.0757643	3.90928e-05	7.7679e-13	6.71752e-05	ENSG00000204287	major histocompatibility complex, class II, DR alpha [Source:HGNC Symbol;Acc:HGNC:4947]	HLA-DRA
rs14004	6	32439932	0.96	0.99	C	A	0.27	0.44	0.46	0.38	HLA-DRA	5'-UTR	rs9268645	1e-100	NA		chr6_32439932_C_A_b38	chr6:32442693:32443185:clu_29095:ENSG00000204287.13	90	208	266	0.436066	1.12733e-06	0.3771	0.0757618	3.90928e-05	7.7679e-13	6.71752e-05	ENSG00000204287	major histocompatibility complex, class II, DR alpha [Source:HGNC Symbol;Acc:HGNC:4947]	HLA-DRA
rs9268645	6	32440750	1	1	C	G	0.3	0.41	0.54	0.37	HLA-DRA	intronic	rs9268645	1e-100	NA		chr6_32440750_C_G_b38	chr6:32442693:32443185:clu_29095:ENSG00000204287.13	908	210	272	0.445902	1.22366e-05	0.335345	0.0753047	3.90928e-05	7.7679e-13	6.71752e-05	ENSG00000204287	major histocompatibility complex, class II, DR alpha [Source:HGNC Symbol;Acc:HGNC:4947]	HLA-DRA
rs9268657	6	32441879	0.99	0.99	G	A	0.23	0.41	0.52	0.37	HLA-DRA	intronic	rs9268645	1e-100	NA		chr6_32441879_G_A_b38	chr6:32442693:32443185:clu_29095:ENSG00000204287.13	2037	206	262	0.429508	4.95948e-07	0.388657	0.0754924	3.90928e-05	7.7679e-13	6.71752e-05	ENSG00000204287	major histocompatibility complex, class II, DR alpha [Source:HGNC Symbol;Acc:HGNC:4947]	HLA-DRA
rs9268763	6	32450639	0.82	0.94	C	T	0.22	0.41	0.5	0.36	5.6kb 3' of HLA-DRA		rs9268645	1e-100	NA		chr6_32450639_C_T_b38	chr6:32442693:32443185:clu_29095:ENSG00000204287.13	10797	202	253	0.414754	3.76533e-06	0.362787	0.0768948	3.90928e-05	7.7679e-13	6.71752e-05	ENSG00000204287	major histocompatibility complex, class II, DR alpha [Source:HGNC Symbol;Acc:HGNC:4947]	HLA-DRA
rs9268804	6	32455578	0.8	0.93	C	G	0.22	0.41	0.5	0.36	11kb 3' of HLA-DRA		rs9268645	1e-100	NA		chr6_32455578_C_G_b38	chr6:32442693:32443185:clu_29095:ENSG00000204287.13	15736	202	253	0.414754	3.76533e-06	0.362787	0.0768948	3.90928e-05	7.7679e-13	6.71752e-05	ENSG00000204287	major histocompatibility complex, class II, DR alpha [Source:HGNC Symbol;Acc:HGNC:4947]	HLA-DRA
rs2523989	6	30110498	1	1	C	T	0.03	0.15	0.07	0.12	TRIM31	missense	rs2523989	2e-08	1.7499		chr6_30110498_C_T_b38	chr6:30730727:30730919:clu_28874:ENSG00000137312.14	-632235	63	70	0.114754	3.64869e-06	-0.520761	0.110217	4.5114e-06	1.5702e-17	8.42158e-10	ENSG00000137312	flotillin 1 [Source:HGNC Symbol;Acc:HGNC:3757]	FLOT1
rs2239529	6	30110553	0.99	1	C	T	0.01	0.14	0.07	0.12	TRIM31	synonymous	rs2523989	2e-08	1.7499		chr6_30110553_C_T_b38	chr6:30730727:30730919:clu_28874:ENSG00000137312.14	-632180	56	61	0.1	3.18141e-08	-0.675293	0.118659	4.5114e-06	1.5702e-17	8.42158e-10	ENSG00000137312	flotillin 1 [Source:HGNC Symbol;Acc:HGNC:3757]	FLOT1
rs2427749	6	30111111	0.87	1	G	A	0.01	0.11	0.06	0.11	TRIM31	intronic	rs2523989	2e-08	1.7499		chr6_30111111_G_A_b38	chr6:30730727:30730919:clu_28874:ENSG00000137312.14	-631622	54	56	0.0918033	1.07007e-09	-0.805647	0.127622	4.5114e-06	1.5702e-17	8.42158e-10	ENSG00000137312	flotillin 1 [Source:HGNC Symbol;Acc:HGNC:3757]	FLOT1
rs2523988	6	30111352	0.87	1	T	C	0.01	0.11	0.06	0.11	TRIM31	intronic	rs2523989	2e-08	1.7499		chr6_30111352_T_C_b38	chr6:30730727:30730919:clu_28874:ENSG00000137312.14	-631381	54	56	0.0918033	1.07007e-09	-0.805647	0.127622	4.5114e-06	1.5702e-17	8.42158e-10	ENSG00000137312	flotillin 1 [Source:HGNC Symbol;Acc:HGNC:3757]	FLOT1
rs2523987	6	30112216	0.87	1	A	C	0.01	0.11	0.06	0.11	TRIM31	intronic	rs2523989	2e-08	1.7499		chr6_30112216_A_C_b38	chr6:30730727:30730919:clu_28874:ENSG00000137312.14	-630517	54	56	0.0918033	1.07007e-09	-0.805647	0.127622	4.5114e-06	1.5702e-17	8.42158e-10	ENSG00000137312	flotillin 1 [Source:HGNC Symbol;Acc:HGNC:3757]	FLOT1
rs2844793	6	30112719	0.98	0.99	G	A	0.07	0.14	0.07	0.12	TRIM31	synonymous	rs2523989	2e-08	1.7499		chr6_30112719_G_A_b38	chr6:30730727:30730919:clu_28874:ENSG00000137312.14	-630014	58	63	0.103279	8.77233e-08	-0.644176	0.117223	4.5114e-06	1.5702e-17	8.42158e-10	ENSG00000137312	flotillin 1 [Source:HGNC Symbol;Acc:HGNC:3757]	FLOT1
rs2844792	6	30113179	0.87	1	G	A	0.01	0.11	0.06	0.11	TRIM31-AS1		rs2523989	2e-08	1.7499		chr6_30113179_G_A_b38	chr6:30730727:30730919:clu_28874:ENSG00000137312.14	-629554	54	56	0.0918033	1.07007e-09	-0.805647	0.127622	4.5114e-06	1.5702e-17	8.42158e-10	ENSG00000137312	flotillin 1 [Source:HGNC Symbol;Acc:HGNC:3757]	FLOT1
rs2517597	6	30113412	0.87	1	G	A	0.01	0.11	0.06	0.11	TRIM31-AS1		rs2523989	2e-08	1.7499		chr6_30113412_G_A_b38	chr6:30730727:30730919:clu_28874:ENSG00000137312.14	-629321	54	56	0.0918033	1.07007e-09	-0.805647	0.127622	4.5114e-06	1.5702e-17	8.42158e-10	ENSG00000137312	flotillin 1 [Source:HGNC Symbol;Acc:HGNC:3757]	FLOT1
rs2523986	6	30113469	0.87	1	C	T	0.01	0.11	0.06	0.11	TRIM31-AS1		rs2523989	2e-08	1.7499		chr6_30113469_C_T_b38	chr6:30730727:30730919:clu_28874:ENSG00000137312.14	-629264	54	56	0.0918033	1.07007e-09	-0.805647	0.127622	4.5114e-06	1.5702e-17	8.42158e-10	ENSG00000137312	flotillin 1 [Source:HGNC Symbol;Acc:HGNC:3757]	FLOT1
rs2523983	6	30114444	0.86	0.99	G	T	0.07	0.12	0.06	0.11	TRIM31-AS1		rs2523989	2e-08	1.7499		chr6_30114444_G_T_b38	chr6:30730727:30730919:clu_28874:ENSG00000137312.14	-628289	56	58	0.095082	4.13107e-09	-0.763977	0.125846	4.5114e-06	1.5702e-17	8.42158e-10	ENSG00000137312	flotillin 1 [Source:HGNC Symbol;Acc:HGNC:3757]	FLOT1
rs2523982	6	30115293	0.82	0.95	C	T	0.07	0.12	0.07	0.11	568bp 3' of TRIM31-AS1		rs2523989	2e-08	1.7499		chr6_30115293_C_T_b38	chr6:30730727:30730919:clu_28874:ENSG00000137312.14	-627440	56	58	0.095082	4.13107e-09	-0.763977	0.125846	4.5114e-06	1.5702e-17	8.42158e-10	ENSG00000137312	flotillin 1 [Source:HGNC Symbol;Acc:HGNC:3757]	FLOT1
rs2523981	6	30115405	0.86	0.99	C	T	0.07	0.12	0.06	0.11	680bp 3' of TRIM31-AS1		rs2523989	2e-08	1.7499		chr6_30115405_C_T_b38	chr6:30730727:30730919:clu_28874:ENSG00000137312.14	-627328	56	58	0.095082	4.13107e-09	-0.763977	0.125846	4.5114e-06	1.5702e-17	8.42158e-10	ENSG00000137312	flotillin 1 [Source:HGNC Symbol;Acc:HGNC:3757]	FLOT1
rs2523979	6	30115738	0.84	0.97	T	A	0.01	0.11	0.06	0.11	1kb 3' of TRIM31-AS1		rs2523989	2e-08	1.7499		chr6_30115738_T_A_b38	chr6:30730727:30730919:clu_28874:ENSG00000137312.14	-626995	54	56	0.0918033	1.07007e-09	-0.805647	0.127622	4.5114e-06	1.5702e-17	8.42158e-10	ENSG00000137312	flotillin 1 [Source:HGNC Symbol;Acc:HGNC:3757]	FLOT1
rs2517596	6	30116078	0.87	1	G	C	0.01	0.11	0.06	0.11	1.4kb 3' of TRIM31-AS1		rs2523989	2e-08	1.7499		chr6_30116078_G_C_b38	chr6:30730727:30730919:clu_28874:ENSG00000137312.14	-626655	54	56	0.0918033	1.07007e-09	-0.805647	0.127622	4.5114e-06	1.5702e-17	8.42158e-10	ENSG00000137312	flotillin 1 [Source:HGNC Symbol;Acc:HGNC:3757]	FLOT1
rs1034327	6	30116536	0.86	0.99	G	T	0.07	0.12	0.06	0.11	1.8kb 3' of TRIM31-AS1		rs2523989	2e-08	1.7499		chr6_30116536_G_T_b38	chr6:30730727:30730919:clu_28874:ENSG00000137312.14	-626197	56	58	0.095082	4.13107e-09	-0.763977	0.125846	4.5114e-06	1.5702e-17	8.42158e-10	ENSG00000137312	flotillin 1 [Source:HGNC Symbol;Acc:HGNC:3757]	FLOT1
rs1034326	6	30116669	0.86	0.99	A	G	0.07	0.12	0.07	0.11	1.9kb 3' of TRIM31-AS1		rs2523989	2e-08	1.7499		chr6_30116669_A_G_b38	chr6:30730727:30730919:clu_28874:ENSG00000137312.14	-626064	58	60	0.0983607	1.094e-08	-0.739644	0.125538	4.5114e-06	1.5702e-17	8.42158e-10	ENSG00000137312	flotillin 1 [Source:HGNC Symbol;Acc:HGNC:3757]	FLOT1
rs2523977	6	30116728	0.87	1	A	G	0.01	0.11	0.06	0.11	2kb 3' of TRIM31-AS1		rs2523989	2e-08	1.7499		chr6_30116728_A_G_b38	chr6:30730727:30730919:clu_28874:ENSG00000137312.14	-626005	54	56	0.0918033	1.07007e-09	-0.805647	0.127622	4.5114e-06	1.5702e-17	8.42158e-10	ENSG00000137312	flotillin 1 [Source:HGNC Symbol;Acc:HGNC:3757]	FLOT1
rs2517595	6	30116772	0.87	1	G	A	0.01	0.11	0.06	0.11	2kb 3' of TRIM31-AS1		rs2523989	2e-08	1.7499		chr6_30116772_G_A_b38	chr6:30730727:30730919:clu_28874:ENSG00000137312.14	-625961	54	56	0.0918033	1.07007e-09	-0.805647	0.127622	4.5114e-06	1.5702e-17	8.42158e-10	ENSG00000137312	flotillin 1 [Source:HGNC Symbol;Acc:HGNC:3757]	FLOT1
rs2523976	6	30116919	0.87	1	T	A	0.01	0.11	0.06	0.11	2.2kb 3' of TRIM31-AS1		rs2523989	2e-08	1.7499		chr6_30116919_T_A_b38	chr6:30730727:30730919:clu_28874:ENSG00000137312.14	-625814	54	56	0.0918033	1.07007e-09	-0.805647	0.127622	4.5114e-06	1.5702e-17	8.42158e-10	ENSG00000137312	flotillin 1 [Source:HGNC Symbol;Acc:HGNC:3757]	FLOT1
rs1015466	6	30118139	0.86	0.99	T	A	0.07	0.12	0.07	0.11	3.4kb 3' of TRIM31-AS1		rs2523989	2e-08	1.7499		chr6_30118139_T_A_b38	chr6:30730727:30730919:clu_28874:ENSG00000137312.14	-624594	58	60	0.0983607	1.094e-08	-0.739644	0.125538	4.5114e-06	1.5702e-17	8.42158e-10	ENSG00000137312	flotillin 1 [Source:HGNC Symbol;Acc:HGNC:3757]	FLOT1
rs2844791	6	30120966	0.93	1	G	A	0.02	0.16	0.12	0.12	6.2kb 3' of TRIM31-AS1		rs2523989	2e-08	1.7499		chr6_30120966_G_A_b38	chr6:30730727:30730919:clu_28874:ENSG00000137312.14	-621767	50	55	0.0901639	9.51416e-08	-0.669713	0.122223	4.5114e-06	1.5702e-17	8.42158e-10	ENSG00000137312	flotillin 1 [Source:HGNC Symbol;Acc:HGNC:3757]	FLOT1
rs2844790	6	30126336	0.81	1	C	G	0.01	0.13	0.09	0.1	6.5kb 3' of SNORA48		rs2523989	2e-08	1.7499		chr6_30126336_C_G_b38	chr6:30730727:30730919:clu_28874:ENSG00000137312.14	-616397	47	49	0.0803279	1.01042e-08	-0.788878	0.13356	4.5114e-06	1.5702e-17	8.42158e-10	ENSG00000137312	flotillin 1 [Source:HGNC Symbol;Acc:HGNC:3757]	FLOT1
rs1541269	6	30135583	0.8	1	G	A	0.01	0.11	0.01	0.1	524bp 5' of TRIM40		rs2523989	2e-08	1.7499		chr6_30135583_G_A_b38	chr6:30730727:30730919:clu_28874:ENSG00000137312.14	-607150	45	46	0.0754098	8.4508e-10	-0.882643	0.138903	4.5114e-06	1.5702e-17	8.42158e-10	ENSG00000137312	flotillin 1 [Source:HGNC Symbol;Acc:HGNC:3757]	FLOT1
rs3129973	6	30753366	0.82	0.92	C	T	0.05	0.03	0	0.09	2.1kb 3' of Metazoa_SRP		rs886424	3e-14	2.2107		chr6_30753366_C_T_b38	chr6:30730727:30730919:clu_28874:ENSG00000137312.14	10633	51	52	0.0852459	2.24062e-11	-0.917078	0.131529	4.5114e-06	1.5702e-17	8.42158e-10	ENSG00000137312	flotillin 1 [Source:HGNC Symbol;Acc:HGNC:3757]	FLOT1
rs3095332	6	30754490	0.83	0.93	C	A	0.02	0.03	0	0.09	3.2kb 3' of Metazoa_SRP		rs886424	3e-14	2.2107		chr6_30754490_C_A_b38	chr6:30730727:30730919:clu_28874:ENSG00000137312.14	11757	43	44	0.0721311	5.65513e-16	-1.17714	0.136832	4.5114e-06	1.5702e-17	8.42158e-10	ENSG00000137312	flotillin 1 [Source:HGNC Symbol;Acc:HGNC:3757]	FLOT1
rs3129974	6	30755392	0.83	0.93	A	G	0.03	0.03	0	0.09	4.1kb 3' of Metazoa_SRP		rs886424	3e-14	2.2107		chr6_30755392_A_G_b38	chr6:30730727:30730919:clu_28874:ENSG00000137312.14	12659	44	45	0.0737705	3.71417e-15	-1.13559	0.13637	4.5114e-06	1.5702e-17	8.42158e-10	ENSG00000137312	flotillin 1 [Source:HGNC Symbol;Acc:HGNC:3757]	FLOT1
rs3095328	6	30756004	0.83	0.93	G	A	0.03	0.03	0	0.09	4.7kb 3' of Metazoa_SRP		rs886424	3e-14	2.2107		chr6_30756004_G_A_b38	chr6:30730727:30730919:clu_28874:ENSG00000137312.14	13271	44	45	0.0737705	3.71417e-15	-1.13559	0.13637	4.5114e-06	1.5702e-17	8.42158e-10	ENSG00000137312	flotillin 1 [Source:HGNC Symbol;Acc:HGNC:3757]	FLOT1
rs3095326	6	30758064	0.82	0.92	C	T	0.05	0.03	0	0.09	6.8kb 3' of Metazoa_SRP		rs886424	3e-14	2.2107		chr6_30758064_C_T_b38	chr6:30730727:30730919:clu_28874:ENSG00000137312.14	15331	51	52	0.0852459	2.24062e-11	-0.917078	0.131529	4.5114e-06	1.5702e-17	8.42158e-10	ENSG00000137312	flotillin 1 [Source:HGNC Symbol;Acc:HGNC:3757]	FLOT1
rs3094118	6	30765081	0.88	0.94	C	T	0.03	0.04	0.01	0.09	1.7kb 5' of HCG20		rs886424	3e-14	2.2107		chr6_30765081_C_T_b38	chr6:30730727:30730919:clu_28874:ENSG00000137312.14	22348	46	47	0.0770492	2.44303e-15	-1.11681	0.133128	4.5114e-06	1.5702e-17	8.42158e-10	ENSG00000137312	flotillin 1 [Source:HGNC Symbol;Acc:HGNC:3757]	FLOT1
rs3130665	6	30768202	0.88	0.94	C	T	0.03	0.04	0	0.09	HCG20		rs886424	3e-14	2.2107		chr6_30768202_C_T_b38	chr6:30730727:30730919:clu_28874:ENSG00000137312.14	25469	46	47	0.0770492	2.44303e-15	-1.11681	0.133128	4.5114e-06	1.5702e-17	8.42158e-10	ENSG00000137312	flotillin 1 [Source:HGNC Symbol;Acc:HGNC:3757]	FLOT1
rs3095336	6	30770669	0.89	0.95	G	A	0.03	0.04	0	0.09	HCG20		rs886424	3e-14	2.2107		chr6_30770669_G_A_b38	chr6:30730727:30730919:clu_28874:ENSG00000137312.14	27936	46	47	0.0775578	1.95961e-15	-1.12199	0.133231	4.5114e-06	1.5702e-17	8.42158e-10	ENSG00000137312	flotillin 1 [Source:HGNC Symbol;Acc:HGNC:3757]	FLOT1
rs3132605	6	30772195	0.89	0.95	A	C	0.03	0.04	0	0.09	HCG20		rs886424	3e-14	2.2107		chr6_30772195_A_C_b38	chr6:30730727:30730919:clu_28874:ENSG00000137312.14	29462	46	47	0.0770492	2.44303e-15	-1.11681	0.133128	4.5114e-06	1.5702e-17	8.42158e-10	ENSG00000137312	flotillin 1 [Source:HGNC Symbol;Acc:HGNC:3757]	FLOT1
rs3095334	6	30774936	0.89	0.95	G	C	0.03	0.04	0	0.09	HCG20		rs886424	3e-14	2.2107		chr6_30774936_G_C_b38	chr6:30730727:30730919:clu_28874:ENSG00000137312.14	32203	46	47	0.0770492	2.44303e-15	-1.11681	0.133128	4.5114e-06	1.5702e-17	8.42158e-10	ENSG00000137312	flotillin 1 [Source:HGNC Symbol;Acc:HGNC:3757]	FLOT1
rs3130670	6	30776087	0.85	0.95	T	G	0.03	0.03	0	0.1	HCG20		rs886424	3e-14	2.2107		chr6_30776087_T_G_b38	chr6:30730727:30730919:clu_28874:ENSG00000137312.14	33354	46	47	0.0770492	2.44303e-15	-1.11681	0.133128	4.5114e-06	1.5702e-17	8.42158e-10	ENSG00000137312	flotillin 1 [Source:HGNC Symbol;Acc:HGNC:3757]	FLOT1
rs3132603	6	30776423	0.89	0.95	C	T	0.03	0.04	0.02	0.09	HCG20		rs886424	3e-14	2.2107		chr6_30776423_C_T_b38	chr6:30730727:30730919:clu_28874:ENSG00000137312.14	33690	46	47	0.0770492	2.44303e-15	-1.11681	0.133128	4.5114e-06	1.5702e-17	8.42158e-10	ENSG00000137312	flotillin 1 [Source:HGNC Symbol;Acc:HGNC:3757]	FLOT1
rs3129978	6	30778554	0.89	0.95	A	G	0.03	0.04	0	0.09	HCG20		rs886424	3e-14	2.2107		chr6_30778554_A_G_b38	chr6:30730727:30730919:clu_28874:ENSG00000137312.14	35821	46	47	0.0770492	2.44303e-15	-1.11681	0.133128	4.5114e-06	1.5702e-17	8.42158e-10	ENSG00000137312	flotillin 1 [Source:HGNC Symbol;Acc:HGNC:3757]	FLOT1
rs3132600	6	30778590	0.85	0.93	C	T	0.02	0.03	0	0.09	HCG20		rs886424	3e-14	2.2107		chr6_30778590_C_T_b38	chr6:30730727:30730919:clu_28874:ENSG00000137312.14	35857	43	44	0.0721311	5.65513e-16	-1.17714	0.136832	4.5114e-06	1.5702e-17	8.42158e-10	ENSG00000137312	flotillin 1 [Source:HGNC Symbol;Acc:HGNC:3757]	FLOT1
rs3130673	6	30778742	0.89	0.95	G	T	0.03	0.04	0	0.09	HCG20		rs886424	3e-14	2.2107		chr6_30778742_G_T_b38	chr6:30730727:30730919:clu_28874:ENSG00000137312.14	36009	46	47	0.0770492	2.44303e-15	-1.11681	0.133128	4.5114e-06	1.5702e-17	8.42158e-10	ENSG00000137312	flotillin 1 [Source:HGNC Symbol;Acc:HGNC:3757]	FLOT1
rs3132599	6	30780387	0.89	0.95	C	G	0.03	0.04	0	0.09	HCG20		rs886424	3e-14	2.2107		chr6_30780387_C_G_b38	chr6:30730727:30730919:clu_28874:ENSG00000137312.14	37654	46	47	0.0770492	2.44303e-15	-1.11681	0.133128	4.5114e-06	1.5702e-17	8.42158e-10	ENSG00000137312	flotillin 1 [Source:HGNC Symbol;Acc:HGNC:3757]	FLOT1
rs3095333	6	30783148	0.94	0.98	T	A	0.03	0.04	0	0.09	HCG20		rs886424	3e-14	2.2107		chr6_30783148_T_A_b38	chr6:30730727:30730919:clu_28874:ENSG00000137312.14	40415	46	47	0.0770492	2.44303e-15	-1.11681	0.133128	4.5114e-06	1.5702e-17	8.42158e-10	ENSG00000137312	flotillin 1 [Source:HGNC Symbol;Acc:HGNC:3757]	FLOT1
rs3131041	6	30787290	0.94	0.98	C	T	0.04	0.04	0	0.09	HCG20		rs886424	3e-14	2.2107		chr6_30787290_C_T_b38	chr6:30730727:30730919:clu_28874:ENSG00000137312.14	44557	48	49	0.0803279	8.52693e-15	-1.06645	0.129992	4.5114e-06	1.5702e-17	8.42158e-10	ENSG00000137312	flotillin 1 [Source:HGNC Symbol;Acc:HGNC:3757]	FLOT1
rs3129980	6	30790594	0.92	0.98	C	G	0.05	0.04	0	0.09	HCG20		rs886424	3e-14	2.2107		chr6_30790594_C_G_b38	chr6:30730727:30730919:clu_28874:ENSG00000137312.14	47861	47	48	0.0786885	1.72016e-14	-1.07596	0.132852	4.5114e-06	1.5702e-17	8.42158e-10	ENSG00000137312	flotillin 1 [Source:HGNC Symbol;Acc:HGNC:3757]	FLOT1
rs141083567	6	30790871	0.92	0.98	7-mer	A	0.05	0.04	0	0.09	HCG20		rs886424	3e-14	2.2107		chr6_30790871_AATGGCC_A_b38	chr6:30730727:30730919:clu_28874:ENSG00000137312.14	48138	47	48	0.0786885	1.72016e-14	-1.07596	0.132852	4.5114e-06	1.5702e-17	8.42158e-10	ENSG00000137312	flotillin 1 [Source:HGNC Symbol;Acc:HGNC:3757]	FLOT1
rs3131044	6	30790887	0.92	0.98	A	C	0.05	0.04	0	0.09	HCG20		rs886424	3e-14	2.2107		chr6_30790887_A_C_b38	chr6:30730727:30730919:clu_28874:ENSG00000137312.14	48154	47	48	0.0786885	1.72016e-14	-1.07596	0.132852	4.5114e-06	1.5702e-17	8.42158e-10	ENSG00000137312	flotillin 1 [Source:HGNC Symbol;Acc:HGNC:3757]	FLOT1
rs3131045	6	30791071	0.92	0.98	T	A	0.05	0.04	0	0.09	HCG20		rs886424	3e-14	2.2107		chr6_30791071_T_A_b38	chr6:30730727:30730919:clu_28874:ENSG00000137312.14	48338	47	48	0.0786885	1.72016e-14	-1.07596	0.132852	4.5114e-06	1.5702e-17	8.42158e-10	ENSG00000137312	flotillin 1 [Source:HGNC Symbol;Acc:HGNC:3757]	FLOT1
rs3129981	6	30791080	0.8	0.98	C	T	0.26	0.11	0	0.11	HCG20		rs886424	3e-14	2.2107		chr6_30791080_C_T_b38	chr6:30730727:30730919:clu_28874:ENSG00000137312.14	48347	67	72	0.118033	2.72071e-12	-0.813567	0.111219	4.5114e-06	1.5702e-17	8.42158e-10	ENSG00000137312	flotillin 1 [Source:HGNC Symbol;Acc:HGNC:3757]	FLOT1
rs3131047	6	30791558	0.92	0.98	T	C	0.05	0.04	0	0.09	HCG20		rs886424	3e-14	2.2107		chr6_30791558_T_C_b38	chr6:30730727:30730919:clu_28874:ENSG00000137312.14	48825	47	48	0.0786885	1.72016e-14	-1.07596	0.132852	4.5114e-06	1.5702e-17	8.42158e-10	ENSG00000137312	flotillin 1 [Source:HGNC Symbol;Acc:HGNC:3757]	FLOT1
rs3131048	6	30791649	0.88	0.98	G	A	0.05	0.04	0	0.1	HCG20		rs886424	3e-14	2.2107		chr6_30791649_G_A_b38	chr6:30730727:30730919:clu_28874:ENSG00000137312.14	48916	47	48	0.0786885	1.72016e-14	-1.07596	0.132852	4.5114e-06	1.5702e-17	8.42158e-10	ENSG00000137312	flotillin 1 [Source:HGNC Symbol;Acc:HGNC:3757]	FLOT1
rs3131049	6	30791712	0.92	0.98	A	G	0.05	0.04	0	0.09	HCG20		rs886424	3e-14	2.2107		chr6_30791712_A_G_b38	chr6:30730727:30730919:clu_28874:ENSG00000137312.14	48979	47	48	0.0786885	1.72016e-14	-1.07596	0.132852	4.5114e-06	1.5702e-17	8.42158e-10	ENSG00000137312	flotillin 1 [Source:HGNC Symbol;Acc:HGNC:3757]	FLOT1
rs3131050	6	30792248	0.92	0.98	T	C	0.05	0.04	0	0.09	HCG20		rs886424	3e-14	2.2107		chr6_30792248_T_C_b38	chr6:30730727:30730919:clu_28874:ENSG00000137312.14	49515	47	48	0.0786885	1.72016e-14	-1.07596	0.132852	4.5114e-06	1.5702e-17	8.42158e-10	ENSG00000137312	flotillin 1 [Source:HGNC Symbol;Acc:HGNC:3757]	FLOT1
rs3129982	6	30792413	0.92	0.98	C	T	0.05	0.04	0	0.09	162bp 3' of HCG20		rs886424	3e-14	2.2107		chr6_30792413_C_T_b38	chr6:30730727:30730919:clu_28874:ENSG00000137312.14	49680	47	48	0.0786885	1.72016e-14	-1.07596	0.132852	4.5114e-06	1.5702e-17	8.42158e-10	ENSG00000137312	flotillin 1 [Source:HGNC Symbol;Acc:HGNC:3757]	FLOT1
rs3131052	6	30792455	0.94	0.97	A	T	0.03	0.04	0.01	0.09	204bp 3' of HCG20		rs886424	3e-14	2.2107		chr6_30792455_A_T_b38	chr6:30730727:30730919:clu_28874:ENSG00000137312.14	49722	47	48	0.0786885	7.45785e-16	-1.12899	0.131851	4.5114e-06	1.5702e-17	8.42158e-10	ENSG00000137312	flotillin 1 [Source:HGNC Symbol;Acc:HGNC:3757]	FLOT1
rs3129983	6	30792499	0.92	0.98	C	T	0.05	0.04	0	0.09	248bp 3' of HCG20		rs886424	3e-14	2.2107		chr6_30792499_C_T_b38	chr6:30730727:30730919:clu_28874:ENSG00000137312.14	49766	47	48	0.0786885	1.72016e-14	-1.07596	0.132852	4.5114e-06	1.5702e-17	8.42158e-10	ENSG00000137312	flotillin 1 [Source:HGNC Symbol;Acc:HGNC:3757]	FLOT1
rs9262200	6	30792948	0.92	0.98	G	A	0.05	0.04	0	0.09	697bp 3' of HCG20		rs886424	3e-14	2.2107		chr6_30792948_G_A_b38	chr6:30730727:30730919:clu_28874:ENSG00000137312.14	50215	47	48	0.0786885	1.72016e-14	-1.07596	0.132852	4.5114e-06	1.5702e-17	8.42158e-10	ENSG00000137312	flotillin 1 [Source:HGNC Symbol;Acc:HGNC:3757]	FLOT1
rs9262202	6	30793130	0.92	0.98	T	C	0.05	0.04	0	0.09	879bp 3' of HCG20		rs886424	3e-14	2.2107		chr6_30793130_T_C_b38	chr6:30730727:30730919:clu_28874:ENSG00000137312.14	50397	47	48	0.0786885	1.72016e-14	-1.07596	0.132852	4.5114e-06	1.5702e-17	8.42158e-10	ENSG00000137312	flotillin 1 [Source:HGNC Symbol;Acc:HGNC:3757]	FLOT1
rs9262203	6	30793191	0.86	0.94	C	T	0.05	0.04	0	0.09	940bp 3' of HCG20		rs886424	3e-14	2.2107		chr6_30793191_C_T_b38	chr6:30730727:30730919:clu_28874:ENSG00000137312.14	50458	47	48	0.0786885	1.72016e-14	-1.07596	0.132852	4.5114e-06	1.5702e-17	8.42158e-10	ENSG00000137312	flotillin 1 [Source:HGNC Symbol;Acc:HGNC:3757]	FLOT1
rs9262204	6	30793312	0.88	0.94	G	A	0.05	0.04	0	0.09	1.1kb 3' of HCG20		rs886424	3e-14	2.2107		chr6_30793312_G_A_b38	chr6:30730727:30730919:clu_28874:ENSG00000137312.14	50579	47	48	0.0786885	1.72016e-14	-1.07596	0.132852	4.5114e-06	1.5702e-17	8.42158e-10	ENSG00000137312	flotillin 1 [Source:HGNC Symbol;Acc:HGNC:3757]	FLOT1
rs3131054	6	30793355	0.87	0.98	C	T	0.05	0.04	0.01	0.1	1.1kb 3' of HCG20		rs886424	3e-14	2.2107		chr6_30793355_C_T_b38	chr6:30730727:30730919:clu_28874:ENSG00000137312.14	50622	47	48	0.0786885	1.72016e-14	-1.07596	0.132852	4.5114e-06	1.5702e-17	8.42158e-10	ENSG00000137312	flotillin 1 [Source:HGNC Symbol;Acc:HGNC:3757]	FLOT1
rs3131055	6	30793710	0.92	0.98	T	C	0.05	0.04	0	0.09	1.5kb 3' of HCG20		rs886424	3e-14	2.2107		chr6_30793710_T_C_b38	chr6:30730727:30730919:clu_28874:ENSG00000137312.14	50977	47	48	0.0786885	1.72016e-14	-1.07596	0.132852	4.5114e-06	1.5702e-17	8.42158e-10	ENSG00000137312	flotillin 1 [Source:HGNC Symbol;Acc:HGNC:3757]	FLOT1
rs3129984	6	30793795	0.91	0.97	C	T	0.03	0.03	0	0.09	1.5kb 3' of HCG20		rs886424	3e-14	2.2107		chr6_30793795_C_T_b38	chr6:30730727:30730919:clu_28874:ENSG00000137312.14	51062	44	45	0.0737705	3.71417e-15	-1.13559	0.13637	4.5114e-06	1.5702e-17	8.42158e-10	ENSG00000137312	flotillin 1 [Source:HGNC Symbol;Acc:HGNC:3757]	FLOT1
rs3131058	6	30794461	0.92	0.98	A	G	0.05	0.04	0	0.09	2.2kb 3' of HCG20		rs886424	3e-14	2.2107		chr6_30794461_A_G_b38	chr6:30730727:30730919:clu_28874:ENSG00000137312.14	51728	47	48	0.0786885	1.72016e-14	-1.07596	0.132852	4.5114e-06	1.5702e-17	8.42158e-10	ENSG00000137312	flotillin 1 [Source:HGNC Symbol;Acc:HGNC:3757]	FLOT1
rs3129985	6	30794765	0.92	0.98	C	T	0.05	0.04	0	0.09	2.5kb 3' of HCG20		rs886424	3e-14	2.2107		chr6_30794765_C_T_b38	chr6:30730727:30730919:clu_28874:ENSG00000137312.14	52032	47	48	0.0786885	1.72016e-14	-1.07596	0.132852	4.5114e-06	1.5702e-17	8.42158e-10	ENSG00000137312	flotillin 1 [Source:HGNC Symbol;Acc:HGNC:3757]	FLOT1
rs3131060	6	30795514	0.92	0.98	G	A	0.05	0.04	0	0.09	3.1kb 3' of LINC00243		rs886424	3e-14	2.2107		chr6_30795514_G_A_b38	chr6:30730727:30730919:clu_28874:ENSG00000137312.14	52781	48	49	0.0803279	1.53398e-13	-1.03606	0.133407	4.5114e-06	1.5702e-17	8.42158e-10	ENSG00000137312	flotillin 1 [Source:HGNC Symbol;Acc:HGNC:3757]	FLOT1
rs3130641	6	30796304	0.95	0.98	C	T	0.03	0.04	0	0.09	2.3kb 3' of LINC00243		rs886424	3e-14	2.2107		chr6_30796304_C_T_b38	chr6:30730727:30730919:clu_28874:ENSG00000137312.14	53571	46	47	0.0770492	2.44303e-15	-1.11681	0.133128	4.5114e-06	1.5702e-17	8.42158e-10	ENSG00000137312	flotillin 1 [Source:HGNC Symbol;Acc:HGNC:3757]	FLOT1
rs1264373	6	30801496	0.95	1	G	A	0.03	0.03	0	0.09	LINC00243		rs886424	3e-14	2.2107		chr6_30801496_G_A_b38	chr6:30730727:30730919:clu_28874:ENSG00000137312.14	58763	43	44	0.0721311	2.63595e-14	-1.11152	0.138341	4.5114e-06	1.5702e-17	8.42158e-10	ENSG00000137312	flotillin 1 [Source:HGNC Symbol;Acc:HGNC:3757]	FLOT1
rs1264361	6	30809721	1	1	A	G	0.04	0.04	0	0.09	LINC00243		rs886424	3e-14	2.2107		chr6_30809721_A_G_b38	chr6:30730727:30730919:clu_28874:ENSG00000137312.14	66988	48	51	0.0836066	5.20155e-13	-0.94831	0.125162	4.5114e-06	1.5702e-17	8.42158e-10	ENSG00000137312	flotillin 1 [Source:HGNC Symbol;Acc:HGNC:3757]	FLOT1
rs2524266	6	30812791	0.95	1	C	T	0.03	0.03	0	0.09	LINC00243		rs886424	3e-14	2.2107		chr6_30812791_C_T_b38	chr6:30730727:30730919:clu_28874:ENSG00000137312.14	70058	46	49	0.0803279	8.57349e-13	-0.959066	0.127905	4.5114e-06	1.5702e-17	8.42158e-10	ENSG00000137312	flotillin 1 [Source:HGNC Symbol;Acc:HGNC:3757]	FLOT1
rs886425	6	30813524	1	1	T	C	0.04	0.04	0	0.09	LINC00243		rs886424	3e-14	2.2107		chr6_30813524_T_C_b38	chr6:30730727:30730919:clu_28874:ENSG00000137312.14	70791	49	52	0.0852459	1.28304e-12	-0.921214	0.123909	4.5114e-06	1.5702e-17	8.42158e-10	ENSG00000137312	flotillin 1 [Source:HGNC Symbol;Acc:HGNC:3757]	FLOT1
rs886424	6	30814225	1	1	C	T	0.04	0.04	0	0.09	LINC00243		rs886424	3e-14	2.2107		chr6_30814225_C_T_b38	chr6:30730727:30730919:clu_28874:ENSG00000137312.14	71492	48	51	0.0836066	5.20155e-13	-0.94831	0.125162	4.5114e-06	1.5702e-17	8.42158e-10	ENSG00000137312	flotillin 1 [Source:HGNC Symbol;Acc:HGNC:3757]	FLOT1
rs1264356	6	30816291	0.95	1	C	T	0.04	0.04	0	0.09	LINC00243		rs886424	3e-14	2.2107		chr6_30816291_C_T_b38	chr6:30730727:30730919:clu_28874:ENSG00000137312.14	73558	48	50	0.0819672	5.25686e-13	-0.974227	0.128611	4.5114e-06	1.5702e-17	8.42158e-10	ENSG00000137312	flotillin 1 [Source:HGNC Symbol;Acc:HGNC:3757]	FLOT1
rs1264355	6	30816416	0.95	1	G	A	0.05	0.05	0.01	0.09	LINC00243		rs886424	3e-14	2.2107		chr6_30816416_G_A_b38	chr6:30730727:30730919:clu_28874:ENSG00000137312.14	73683	48	50	0.0819672	5.25686e-13	-0.974227	0.128611	4.5114e-06	1.5702e-17	8.42158e-10	ENSG00000137312	flotillin 1 [Source:HGNC Symbol;Acc:HGNC:3757]	FLOT1
rs1264353	6	30819985	1	1	C	A	0.04	0.04	0	0.09	LINC00243		rs886424	3e-14	2.2107		chr6_30819985_C_A_b38	chr6:30730727:30730919:clu_28874:ENSG00000137312.14	77252	48	50	0.0819672	5.25686e-13	-0.974227	0.128611	4.5114e-06	1.5702e-17	8.42158e-10	ENSG00000137312	flotillin 1 [Source:HGNC Symbol;Acc:HGNC:3757]	FLOT1
rs1264351	6	30824340	0.95	1	G	C	0.03	0.03	0	0.09	LINC00243		rs886424	3e-14	2.2107		chr6_30824340_G_C_b38	chr6:30730727:30730919:clu_28874:ENSG00000137312.14	81607	44	46	0.0754098	4.85104e-13	-1.0185	0.134232	4.5114e-06	1.5702e-17	8.42158e-10	ENSG00000137312	flotillin 1 [Source:HGNC Symbol;Acc:HGNC:3757]	FLOT1
rs1264349	6	30828882	0.95	1	A	G	0.03	0.03	0	0.09	LINC00243		rs886424	3e-14	2.2107		chr6_30828882_A_G_b38	chr6:30730727:30730919:clu_28874:ENSG00000137312.14	86149	44	46	0.0754098	4.85104e-13	-1.0185	0.134232	4.5114e-06	1.5702e-17	8.42158e-10	ENSG00000137312	flotillin 1 [Source:HGNC Symbol;Acc:HGNC:3757]	FLOT1
rs1264347	6	30830920	0.87	0.97	C	T	0.06	0.02	0.04	0.09	260bp 5' of LINC00243		rs886424	3e-14	2.2107		chr6_30830920_C_T_b38	chr6:30730727:30730919:clu_28874:ENSG00000137312.14	88187	48	50	0.0819672	1.27443e-11	-0.923705	0.13074	4.5114e-06	1.5702e-17	8.42158e-10	ENSG00000137312	flotillin 1 [Source:HGNC Symbol;Acc:HGNC:3757]	FLOT1
rs1264341	6	30834688	0.87	0.97	T	C	0.05	0.02	0.01	0.09	4kb 5' of LINC00243		rs886424	3e-14	2.2107		chr6_30834688_T_C_b38	chr6:30730727:30730919:clu_28874:ENSG00000137312.14	91955	46	48	0.0786885	9.66761e-13	-0.994824	0.13301	4.5114e-06	1.5702e-17	8.42158e-10	ENSG00000137312	flotillin 1 [Source:HGNC Symbol;Acc:HGNC:3757]	FLOT1
rs1110482	6	30835749	0.87	0.97	A	G	0.05	0.02	0.01	0.09	3.8kb 3' of XXbac-BPG27H4.8		rs886424	3e-14	2.2107		chr6_30835749_A_G_b38	chr6:30730727:30730919:clu_28874:ENSG00000137312.14	93016	46	48	0.0786885	9.66761e-13	-0.994824	0.13301	4.5114e-06	1.5702e-17	8.42158e-10	ENSG00000137312	flotillin 1 [Source:HGNC Symbol;Acc:HGNC:3757]	FLOT1
rs2517578	6	30843488	0.87	0.97	G	C	0.05	0.02	0.01	0.09	XXbac-BPG27H4.8		rs886424	3e-14	2.2107		chr6_30843488_G_C_b38	chr6:30730727:30730919:clu_28874:ENSG00000137312.14	100755	46	48	0.0786885	9.66761e-13	-0.994824	0.13301	4.5114e-06	1.5702e-17	8.42158e-10	ENSG00000137312	flotillin 1 [Source:HGNC Symbol;Acc:HGNC:3757]	FLOT1
rs2535334	6	30845219	0.87	0.97	G	A	0.05	0.02	0.01	0.09	XXbac-BPG27H4.8		rs886424	3e-14	2.2107		chr6_30845219_G_A_b38	chr6:30730727:30730919:clu_28874:ENSG00000137312.14	102486	46	48	0.0786885	9.66761e-13	-0.994824	0.13301	4.5114e-06	1.5702e-17	8.42158e-10	ENSG00000137312	flotillin 1 [Source:HGNC Symbol;Acc:HGNC:3757]	FLOT1
rs2535332	6	30845472	0.87	0.97	C	T	0.05	0.02	0.01	0.09	XXbac-BPG27H4.8		rs886424	3e-14	2.2107		chr6_30845472_C_T_b38	chr6:30730727:30730919:clu_28874:ENSG00000137312.14	102739	46	48	0.0786885	9.66761e-13	-0.994824	0.13301	4.5114e-06	1.5702e-17	8.42158e-10	ENSG00000137312	flotillin 1 [Source:HGNC Symbol;Acc:HGNC:3757]	FLOT1
rs2263298	6	30852596	0.89	0.98	C	T	0.04	0.02	0	0.08	4.4kb 5' of XXbac-BPG27H4.8		rs886424	3e-14	2.2107		chr6_30852596_C_T_b38	chr6:30730727:30730919:clu_28874:ENSG00000137312.14	109863	45	47	0.0770492	3.46493e-13	-1.02296	0.133894	4.5114e-06	1.5702e-17	8.42158e-10	ENSG00000137312	flotillin 1 [Source:HGNC Symbol;Acc:HGNC:3757]	FLOT1
rs2844661	6	30853745	0.86	0.95	C	T	0.06	0.03	0.01	0.09	5.6kb 5' of XXbac-BPG27H4.8		rs886424	3e-14	2.2107		chr6_30853745_C_T_b38	chr6:30730727:30730919:clu_28874:ENSG00000137312.14	111012	46	48	0.0786885	9.66761e-13	-0.994824	0.13301	4.5114e-06	1.5702e-17	8.42158e-10	ENSG00000137312	flotillin 1 [Source:HGNC Symbol;Acc:HGNC:3757]	FLOT1
rs2535328	6	30858217	0.87	0.97	C	T	0.05	0.02	0.01	0.09	6kb 5' of 7SK		rs886424	3e-14	2.2107		chr6_30858217_C_T_b38	chr6:30730727:30730919:clu_28874:ENSG00000137312.14	115484	46	48	0.0786885	9.66761e-13	-0.994824	0.13301	4.5114e-06	1.5702e-17	8.42158e-10	ENSG00000137312	flotillin 1 [Source:HGNC Symbol;Acc:HGNC:3757]	FLOT1
rs3132577	6	30863418	0.87	0.97	G	A	0.05	0.02	0.01	0.09	831bp 5' of 7SK		rs886424	3e-14	2.2107		chr6_30863418_G_A_b38	chr6:30730727:30730919:clu_28874:ENSG00000137312.14	120685	46	48	0.0786885	9.66761e-13	-0.994824	0.13301	4.5114e-06	1.5702e-17	8.42158e-10	ENSG00000137312	flotillin 1 [Source:HGNC Symbol;Acc:HGNC:3757]	FLOT1
rs2844656	6	30866554	0.87	0.97	A	G	0.05	0.02	0.01	0.09	427bp 3' of DDR1-AS1		rs886424	3e-14	2.2107		chr6_30866554_A_G_b38	chr6:30730727:30730919:clu_28874:ENSG00000137312.14	123821	46	48	0.0786885	9.66761e-13	-0.994824	0.13301	4.5114e-06	1.5702e-17	8.42158e-10	ENSG00000137312	flotillin 1 [Source:HGNC Symbol;Acc:HGNC:3757]	FLOT1
rs2535340	6	30870720	0.87	0.97	T	C	0.05	0.02	0.01	0.09	DDR1-AS1		rs886424	3e-14	2.2107		chr6_30870720_T_C_b38	chr6:30730727:30730919:clu_28874:ENSG00000137312.14	127987	46	48	0.0786885	9.66761e-13	-0.994824	0.13301	4.5114e-06	1.5702e-17	8.42158e-10	ENSG00000137312	flotillin 1 [Source:HGNC Symbol;Acc:HGNC:3757]	FLOT1
rs2517572	6	30874852	0.87	0.97	C	T	0.05	0.02	0.01	0.09	DDR1-AS1		rs886424	3e-14	2.2107		chr6_30874852_C_T_b38	chr6:30730727:30730919:clu_28874:ENSG00000137312.14	132119	46	48	0.0786885	9.66761e-13	-0.994824	0.13301	4.5114e-06	1.5702e-17	8.42158e-10	ENSG00000137312	flotillin 1 [Source:HGNC Symbol;Acc:HGNC:3757]	FLOT1
rs1264326	6	30884132	0.83	0.92	C	A	0.06	0.02	0.02	0.09	DDR1	5'-UTR	rs886424	3e-14	2.2107		chr6_30884132_C_A_b38	chr6:30730727:30730919:clu_28874:ENSG00000137312.14	141399	46	48	0.0786885	9.66761e-13	-0.994824	0.13301	4.5114e-06	1.5702e-17	8.42158e-10	ENSG00000137312	flotillin 1 [Source:HGNC Symbol;Acc:HGNC:3757]	FLOT1
rs1264325	6	30884212	0.87	0.97	G	A	0.05	0.02	0.01	0.09	DDR1	intronic	rs886424	3e-14	2.2107		chr6_30884212_G_A_b38	chr6:30730727:30730919:clu_28874:ENSG00000137312.14	141479	45	47	0.0770492	2.97933e-12	-0.980999	0.134375	4.5114e-06	1.5702e-17	8.42158e-10	ENSG00000137312	flotillin 1 [Source:HGNC Symbol;Acc:HGNC:3757]	FLOT1
rs1264324	6	30887434	0.89	0.98	T	G	0.03	0.02	0	0.08	DDR1	intronic	rs886424	3e-14	2.2107		chr6_30887434_T_G_b38	chr6:30730727:30730919:clu_28874:ENSG00000137312.14	144701	45	47	0.0770492	3.46493e-13	-1.02296	0.133894	4.5114e-06	1.5702e-17	8.42158e-10	ENSG00000137312	flotillin 1 [Source:HGNC Symbol;Acc:HGNC:3757]	FLOT1
rs1264322	6	30890117	0.87	0.97	G	A	0.05	0.02	0.01	0.09	DDR1	intronic	rs886424	3e-14	2.2107		chr6_30890117_G_A_b38	chr6:30730727:30730919:clu_28874:ENSG00000137312.14	147384	46	48	0.0786885	9.66761e-13	-0.994824	0.13301	4.5114e-06	1.5702e-17	8.42158e-10	ENSG00000137312	flotillin 1 [Source:HGNC Symbol;Acc:HGNC:3757]	FLOT1
rs886422	6	30896502	0.87	0.97	C	T	0.05	0.02	0.01	0.09	DDR1	intronic	rs886424	3e-14	2.2107		chr6_30896502_C_T_b38	chr6:30730727:30730919:clu_28874:ENSG00000137312.14	153769	46	48	0.0786885	9.66761e-13	-0.994824	0.13301	4.5114e-06	1.5702e-17	8.42158e-10	ENSG00000137312	flotillin 1 [Source:HGNC Symbol;Acc:HGNC:3757]	FLOT1
rs1049633	6	30899750	0.87	0.97	G	A	0.05	0.02	0.01	0.09	DDR1	3'-UTR	rs886424	3e-14	2.2107		chr6_30899750_G_A_b38	chr6:30730727:30730919:clu_28874:ENSG00000137312.14	157017	46	48	0.0786885	9.66761e-13	-0.994824	0.13301	4.5114e-06	1.5702e-17	8.42158e-10	ENSG00000137312	flotillin 1 [Source:HGNC Symbol;Acc:HGNC:3757]	FLOT1
rs1264313	6	30905006	0.87	0.97	C	T	0.05	0.02	0.01	0.09	1.9kb 5' of Metazoa_SRP		rs886424	3e-14	2.2107		chr6_30905006_C_T_b38	chr6:30730727:30730919:clu_28874:ENSG00000137312.14	162273	46	48	0.0786885	9.66761e-13	-0.994824	0.13301	4.5114e-06	1.5702e-17	8.42158e-10	ENSG00000137312	flotillin 1 [Source:HGNC Symbol;Acc:HGNC:3757]	FLOT1
rs1264312	6	30905205	0.87	0.97	G	A	0.05	0.02	0.01	0.09	1.7kb 5' of Metazoa_SRP		rs886424	3e-14	2.2107		chr6_30905205_G_A_b38	chr6:30730727:30730919:clu_28874:ENSG00000137312.14	162472	46	48	0.0786885	9.66761e-13	-0.994824	0.13301	4.5114e-06	1.5702e-17	8.42158e-10	ENSG00000137312	flotillin 1 [Source:HGNC Symbol;Acc:HGNC:3757]	FLOT1
rs1264310	6	30905828	0.87	0.97	C	A,G,T	0.05	0.02	0.01	0.09	1kb 5' of Metazoa_SRP		rs886424	3e-14	2.2107		chr6_30905828_C_A_b38	chr6:30730727:30730919:clu_28874:ENSG00000137312.14	163095	46	48	0.0786885	9.66761e-13	-0.994824	0.13301	4.5114e-06	1.5702e-17	8.42158e-10	ENSG00000137312	flotillin 1 [Source:HGNC Symbol;Acc:HGNC:3757]	FLOT1
rs886420	6	30911859	0.89	0.98	C	T	0.02	0.02	0	0.08	GTF2H4	intronic	rs886424	3e-14	2.2107		chr6_30911859_C_T_b38	chr6:30730727:30730919:clu_28874:ENSG00000137312.14	169126	45	47	0.0770492	3.46493e-13	-1.02296	0.133894	4.5114e-06	1.5702e-17	8.42158e-10	ENSG00000137312	flotillin 1 [Source:HGNC Symbol;Acc:HGNC:3757]	FLOT1
rs1264308	6	30912210	0.87	0.97	C	T	0.05	0.02	0.01	0.09	GTF2H4	intronic	rs886424	3e-14	2.2107		chr6_30912210_C_T_b38	chr6:30730727:30730919:clu_28874:ENSG00000137312.14	169477	46	48	0.0786885	9.66761e-13	-0.994824	0.13301	4.5114e-06	1.5702e-17	8.42158e-10	ENSG00000137312	flotillin 1 [Source:HGNC Symbol;Acc:HGNC:3757]	FLOT1
rs1264304	6	30914638	0.87	0.97	C	T	0.05	0.02	0.01	0.09	VARS2	intronic	rs886424	3e-14	2.2107		chr6_30914638_C_T_b38	chr6:30730727:30730919:clu_28874:ENSG00000137312.14	171905	46	48	0.0786885	9.66761e-13	-0.994824	0.13301	4.5114e-06	1.5702e-17	8.42158e-10	ENSG00000137312	flotillin 1 [Source:HGNC Symbol;Acc:HGNC:3757]	FLOT1
rs3094088	6	30927188	0.87	0.97	T	A	0.05	0.02	0.01	0.09	728bp 3' of VARS2		rs886424	3e-14	2.2107		chr6_30927188_T_A_b38	chr6:30730727:30730919:clu_28874:ENSG00000137312.14	184455	46	48	0.0786885	9.66761e-13	-0.994824	0.13301	4.5114e-06	1.5702e-17	8.42158e-10	ENSG00000137312	flotillin 1 [Source:HGNC Symbol;Acc:HGNC:3757]	FLOT1
rs3095155	6	30931274	0.87	0.97	G	C	0.05	0.02	0.01	0.09	78bp 3' of SFTA2		rs886424	3e-14	2.2107		chr6_30931274_G_C_b38	chr6:30730727:30730919:clu_28874:ENSG00000137312.14	188541	46	48	0.0786885	9.66761e-13	-0.994824	0.13301	4.5114e-06	1.5702e-17	8.42158e-10	ENSG00000137312	flotillin 1 [Source:HGNC Symbol;Acc:HGNC:3757]	FLOT1
rs3095156	6	30958740	0.84	0.95	C	T	0.04	0.02	0	0.09	3.9kb 5' of HCG21		rs886424	3e-14	2.2107		chr6_30958740_C_T_b38	chr6:30730727:30730919:clu_28874:ENSG00000137312.14	216007	45	47	0.0775578	4.76827e-13	-1.01761	0.134069	4.5114e-06	1.5702e-17	8.42158e-10	ENSG00000137312	flotillin 1 [Source:HGNC Symbol;Acc:HGNC:3757]	FLOT1
rs3131781	6	30969955	0.81	0.96	A	G	0.01	0.02	0	0.08	14kb 5' of MUC21		rs886424	3e-14	2.2107		chr6_30969955_A_G_b38	chr6:30730727:30730919:clu_28874:ENSG00000137312.14	227222	48	50	0.0819672	1.82245e-12	-0.970738	0.131556	4.5114e-06	1.5702e-17	8.42158e-10	ENSG00000137312	flotillin 1 [Source:HGNC Symbol;Acc:HGNC:3757]	FLOT1
rs2523457	6	31397930	0.87	0.98	G	A	0.24	0.19	0.27	0.27	1.9kb 5' of MICA		rs2251396	1e-22	2.2132		chr6_31397930_G_A_b38	chr6:31410797:31411209:clu_28923:ENSG00000204520.12	-1854	143	161	0.263934	5.17131e-07	-0.451608	0.0878666	6.39556e-06	6.87716e-58	1.89243e-39	ENSG00000204520	MHC class I polypeptide-related sequence A [Source:HGNC Symbol;Acc:HGNC:7090]	MICA
rs2523454	6	31400088	0.82	0.92	G	A	0.08	0.16	0.27	0.26	MICA		rs2251396	1e-22	2.2132		chr6_31400088_G_A_b38	chr6:31410797:31411209:clu_28923:ENSG00000204520.12	304	134	150	0.245902	2.24966e-06	-0.438215	0.0907258	6.39556e-06	6.87716e-58	1.89243e-39	ENSG00000204520	MHC class I polypeptide-related sequence A [Source:HGNC Symbol;Acc:HGNC:7090]	MICA
rs2523451	6	31401374	0.87	0.98	G	A	0.24	0.19	0.27	0.27	MICA	intronic	rs2251396	1e-22	2.2132		chr6_31401374_G_A_b38	chr6:31410797:31411209:clu_28923:ENSG00000204520.12	1590	143	161	0.263934	5.17131e-07	-0.451608	0.0878666	6.39556e-06	6.87716e-58	1.89243e-39	ENSG00000204520	MHC class I polypeptide-related sequence A [Source:HGNC Symbol;Acc:HGNC:7090]	MICA
rs3130632	6	31594987	0.95	0.98	C	T	0.43	0.25	0.46	0.16	2kb 5' of NCR3		rs2857595	2e-23	2.3765		chr6_31594987_C_T_b38	chr6:30730727:30730919:clu_28874:ENSG00000137312.14	852254	109	123	0.201639	3.95087e-07	-0.498198	0.0959025	4.5114e-06	1.5702e-17	8.42158e-10	ENSG00000137312	flotillin 1 [Source:HGNC Symbol;Acc:HGNC:3757]	FLOT1
rs2857595	6	31600692	1	1	G	A	0.44	0.25	0.48	0.16	7.7kb 5' of NCR3		rs2857595	2e-23	2.3765		chr6_31600692_G_A_b38	chr6:30730727:30730919:clu_28874:ENSG00000137312.14	857959	109	125	0.204918	2.02051e-07	-0.502218	0.0942195	4.5114e-06	1.5702e-17	8.42158e-10	ENSG00000137312	flotillin 1 [Source:HGNC Symbol;Acc:HGNC:3757]	FLOT1
rs3131383	6	31736517	0.8	0.92	G	T	0.06	0.03	0	0.08	CLIC1	5'-UTR	rs1270942	5e-25	3.0494		chr6_31736517_G_T_b38	chr6:30730727:30730919:clu_28874:ENSG00000137312.14	993784	49	51	0.0836066	4.61387e-10	-0.840964	0.130175	4.5114e-06	1.5702e-17	8.42158e-10	ENSG00000137312	flotillin 1 [Source:HGNC Symbol;Acc:HGNC:3757]	FLOT1
rs3101018	6	31738087	0.8	0.92	C	T	0.04	0.02	0	0.08	CLIC1		rs1270942	5e-25	3.0494		chr6_31738087_C_T_b38	chr6:30730727:30730919:clu_28874:ENSG00000137312.14	995354	49	51	0.0836066	4.61387e-10	-0.840964	0.130175	4.5114e-06	1.5702e-17	8.42158e-10	ENSG00000137312	flotillin 1 [Source:HGNC Symbol;Acc:HGNC:3757]	FLOT1
rs3131381	6	31740686	0.8	0.92	C	A	0.06	0.03	0	0.08	MSH5	intronic	rs1270942	5e-25	3.0494		chr6_31740686_C_A_b38	chr6:30730727:30730919:clu_28874:ENSG00000137312.14	997953	49	51	0.0836066	4.61387e-10	-0.840964	0.130175	4.5114e-06	1.5702e-17	8.42158e-10	ENSG00000137312	flotillin 1 [Source:HGNC Symbol;Acc:HGNC:3757]	FLOT1
rs3131380	6	31742001	0.8	0.92	A	G	0.06	0.03	0	0.08	MSH5	intronic	rs1270942	5e-25	3.0494		chr6_31742001_A_G_b38	chr6:30730727:30730919:clu_28874:ENSG00000137312.14	999268	49	51	0.0836066	4.61387e-10	-0.840964	0.130175	4.5114e-06	1.5702e-17	8.42158e-10	ENSG00000137312	flotillin 1 [Source:HGNC Symbol;Acc:HGNC:3757]	FLOT1
rs3132445	6	31744419	0.8	0.92	G	A	0.06	0.03	0	0.08	MSH5	intronic	rs1270942	5e-25	3.0494		chr6_31744419_G_A_b38	chr6:31151122:31156731:clu_28908:ENSG00000204536.13	586181	49	51	0.0836066	9.90717e-12	0.993862	0.139856	4.70829e-06	2.64029e-41	2.91044e-19	ENSG00000204536	coiled-coil alpha-helical rod protein 1 [Source:HGNC Symbol;Acc:HGNC:13930]	CCHCR1
rs3132443	6	31746254	0.8	0.92	G	A	0.05	0.02	0	0.08	MSH5	intronic	rs1270942	5e-25	3.0494		chr6_31746254_G_A_b38	chr6:31151122:31156731:clu_28908:ENSG00000204536.13	588016	49	51	0.0836066	9.90717e-12	0.993862	0.139856	4.70829e-06	2.64029e-41	2.91044e-19	ENSG00000204536	coiled-coil alpha-helical rod protein 1 [Source:HGNC Symbol;Acc:HGNC:13930]	CCHCR1
rs3130484	6	31748105	0.8	0.92	T	C	0.06	0.03	0	0.08	MSH5	intronic	rs1270942	5e-25	3.0494		chr6_31748105_T_C_b38	chr6:31151122:31156731:clu_28908:ENSG00000204536.13	589867	49	51	0.0836066	9.90717e-12	0.993862	0.139856	4.70829e-06	2.64029e-41	2.91044e-19	ENSG00000204536	coiled-coil alpha-helical rod protein 1 [Source:HGNC Symbol;Acc:HGNC:13930]	CCHCR1
rs3117573	6	31750619	0.8	0.92	C	G	0.05	0.02	0	0.08	MSH5	intronic	rs1270942	5e-25	3.0494		chr6_31750619_C_G_b38	chr6:31151122:31156731:clu_28908:ENSG00000204536.13	592381	49	51	0.0836066	9.90717e-12	0.993862	0.139856	4.70829e-06	2.64029e-41	2.91044e-19	ENSG00000204536	coiled-coil alpha-helical rod protein 1 [Source:HGNC Symbol;Acc:HGNC:13930]	CCHCR1
rs3131379	6	31753256	0.8	0.92	G	A	0.06	0.03	0	0.08	MSH5	intronic	rs1270942	5e-25	3.0494		chr6_31753256_G_A_b38	chr6:31151122:31156731:clu_28908:ENSG00000204536.13	595018	49	51	0.0836066	9.90717e-12	0.993862	0.139856	4.70829e-06	2.64029e-41	2.91044e-19	ENSG00000204536	coiled-coil alpha-helical rod protein 1 [Source:HGNC Symbol;Acc:HGNC:13930]	CCHCR1
rs3131378	6	31757508	0.8	0.92	A	G	0.06	0.03	0	0.08	MSH5	intronic	rs1270942	5e-25	3.0494		chr6_31757508_A_G_b38	chr6:31151122:31156731:clu_28908:ENSG00000204536.13	599270	49	51	0.0836066	9.90717e-12	0.993862	0.139856	4.70829e-06	2.64029e-41	2.91044e-19	ENSG00000204536	coiled-coil alpha-helical rod protein 1 [Source:HGNC Symbol;Acc:HGNC:13930]	CCHCR1
rs3117575	6	31758476	0.8	0.92	T	C	0.05	0.02	0	0.08	MSH5	intronic	rs1270942	5e-25	3.0494		chr6_31758476_T_C_b38	chr6:31151122:31156731:clu_28908:ENSG00000204536.13	600238	49	51	0.0836066	9.90717e-12	0.993862	0.139856	4.70829e-06	2.64029e-41	2.91044e-19	ENSG00000204536	coiled-coil alpha-helical rod protein 1 [Source:HGNC Symbol;Acc:HGNC:13930]	CCHCR1
rs3117576	6	31759017	0.8	0.92	T	C	0.06	0.03	0	0.08	MSH5	intronic	rs1270942	5e-25	3.0494		chr6_31759017_T_C_b38	chr6:31151122:31156731:clu_28908:ENSG00000204536.13	600779	49	51	0.0836066	9.90717e-12	0.993862	0.139856	4.70829e-06	2.64029e-41	2.91044e-19	ENSG00000204536	coiled-coil alpha-helical rod protein 1 [Source:HGNC Symbol;Acc:HGNC:13930]	CCHCR1
rs3117577	6	31759697	0.8	0.92	A	G	0.04	0.02	0	0.08	MSH5	intronic	rs1270942	5e-25	3.0494		chr6_31759697_A_G_b38	chr6:31151122:31156731:clu_28908:ENSG00000204536.13	601459	49	51	0.0836066	9.90717e-12	0.993862	0.139856	4.70829e-06	2.64029e-41	2.91044e-19	ENSG00000204536	coiled-coil alpha-helical rod protein 1 [Source:HGNC Symbol;Acc:HGNC:13930]	CCHCR1
rs3115672	6	31760120	0.8	0.92	C	T	0.06	0.03	0	0.08	MSH5	synonymous	rs1270942	5e-25	3.0494		chr6_31760120_C_T_b38	chr6:31151122:31156731:clu_28908:ENSG00000204536.13	601882	49	51	0.0836066	9.90717e-12	0.993862	0.139856	4.70829e-06	2.64029e-41	2.91044e-19	ENSG00000204536	coiled-coil alpha-helical rod protein 1 [Source:HGNC Symbol;Acc:HGNC:13930]	CCHCR1
rs3101017	6	31765689	0.8	0.92	T	C	0.06	0.03	0	0.08	VWA7	missense	rs1270942	5e-25	3.0494		chr6_31765689_T_C_b38	chr6:31151122:31156731:clu_28908:ENSG00000204536.13	607451	49	51	0.0836066	9.90717e-12	0.993862	0.139856	4.70829e-06	2.64029e-41	2.91044e-19	ENSG00000204536	coiled-coil alpha-helical rod protein 1 [Source:HGNC Symbol;Acc:HGNC:13930]	CCHCR1
rs3115671	6	31766568	0.8	0.92	G	T	0.06	0.03	0	0.08	VWA7	synonymous	rs1270942	5e-25	3.0494		chr6_31766568_G_T_b38	chr6:31151122:31156731:clu_28908:ENSG00000204536.13	608330	49	51	0.0836066	9.90717e-12	0.993862	0.139856	4.70829e-06	2.64029e-41	2.91044e-19	ENSG00000204536	coiled-coil alpha-helical rod protein 1 [Source:HGNC Symbol;Acc:HGNC:13930]	CCHCR1
rs3130490	6	31771343	0.83	0.94	G	T	0.06	0.03	0	0.08	VWA7	intronic	rs1270942	5e-25	3.0494		chr6_31771343_G_T_b38	chr6:31151122:31156731:clu_28908:ENSG00000204536.13	613105	49	51	0.0836066	9.90717e-12	0.993862	0.139856	4.70829e-06	2.64029e-41	2.91044e-19	ENSG00000204536	coiled-coil alpha-helical rod protein 1 [Source:HGNC Symbol;Acc:HGNC:13930]	CCHCR1
rs3130491	6	31777687	0.83	0.94	G	A	0	0.02	0	0.08	VARS	intronic	rs1270942	5e-25	3.0494		chr6_31777687_G_A_b38	chr6:31151122:31156731:clu_28908:ENSG00000204536.13	619449	42	44	0.0721311	1.01508e-10	1.01179	0.150565	4.70829e-06	2.64029e-41	2.91044e-19	ENSG00000204536	coiled-coil alpha-helical rod protein 1 [Source:HGNC Symbol;Acc:HGNC:13930]	CCHCR1
rs915652	6	31781365	0.83	0.94	G	A	0.01	0.02	0	0.08	VARS	intronic	rs1270942	5e-25	3.0494		chr6_31781365_G_A_b38	chr6:31151122:31156731:clu_28908:ENSG00000204536.13	623127	47	49	0.0803279	1.80605e-11	1.00199	0.142979	4.70829e-06	2.64029e-41	2.91044e-19	ENSG00000204536	coiled-coil alpha-helical rod protein 1 [Source:HGNC Symbol;Acc:HGNC:13930]	CCHCR1
rs915651	6	31781407	0.83	0.94	G	A	0.05	0.02	0	0.08	VARS	intronic	rs1270942	5e-25	3.0494		chr6_31781407_G_A_b38	chr6:31151122:31156731:clu_28908:ENSG00000204536.13	623169	49	51	0.0836066	9.90717e-12	0.993862	0.139856	4.70829e-06	2.64029e-41	2.91044e-19	ENSG00000204536	coiled-coil alpha-helical rod protein 1 [Source:HGNC Symbol;Acc:HGNC:13930]	CCHCR1
rs2753961	6	31787053	0.82	0.94	T	C	0.05	0.02	0	0.08	VARS	intronic	rs1270942	5e-25	3.0494		chr6_31787053_T_C_b38	chr6:31151122:31156731:clu_28908:ENSG00000204536.13	628815	43	43	0.0796296	4.71974e-12	1.13538	0.157113	4.70829e-06	2.64029e-41	2.91044e-19	ENSG00000204536	coiled-coil alpha-helical rod protein 1 [Source:HGNC Symbol;Acc:HGNC:13930]	CCHCR1
rs2607014	6	31793436	0.82	0.96	G	A	0.05	0.03	0	0.08	VARS	intronic	rs1270942	5e-25	3.0494		chr6_31793436_G_A_b38	chr6:31151122:31156731:clu_28908:ENSG00000204536.13	635198	49	51	0.0836066	9.90717e-12	0.993862	0.139856	4.70829e-06	2.64029e-41	2.91044e-19	ENSG00000204536	coiled-coil alpha-helical rod protein 1 [Source:HGNC Symbol;Acc:HGNC:13930]	CCHCR1
rs2736425	6	31798207	0.84	0.96	G	A	0.05	0.02	0	0.08	LSM2	intronic	rs1270942	5e-25	3.0494		chr6_31798207_G_A_b38	chr6:31151122:31156731:clu_28908:ENSG00000204536.13	639969	49	51	0.0836066	9.90717e-12	0.993862	0.139856	4.70829e-06	2.64029e-41	2.91044e-19	ENSG00000204536	coiled-coil alpha-helical rod protein 1 [Source:HGNC Symbol;Acc:HGNC:13930]	CCHCR1
rs2763980	6	31798883	0.85	0.96	C	T	0.04	0.03	0	0.08	LSM2	intronic	rs1270942	5e-25	3.0494		chr6_31798883_C_T_b38	chr6:31151122:31156731:clu_28908:ENSG00000204536.13	640645	49	51	0.0836066	9.90717e-12	0.993862	0.139856	4.70829e-06	2.64029e-41	2.91044e-19	ENSG00000204536	coiled-coil alpha-helical rod protein 1 [Source:HGNC Symbol;Acc:HGNC:13930]	CCHCR1
rs625421	6	31804316	0.87	0.96	C	A	0.05	0.02	0	0.08	LSM2	intronic	rs1270942	5e-25	3.0494		chr6_31804316_C_A_b38	chr6:31151122:31156731:clu_28908:ENSG00000204536.13	646078	49	51	0.0836066	9.90717e-12	0.993862	0.139856	4.70829e-06	2.64029e-41	2.91044e-19	ENSG00000204536	coiled-coil alpha-helical rod protein 1 [Source:HGNC Symbol;Acc:HGNC:13930]	CCHCR1
rs553414	6	31809415	0.87	0.96	A	G	0.05	0.02	0	0.08	203bp 3' of HSPA1L		rs1270942	5e-25	3.0494		chr6_31809415_A_G_b38	chr6:31151122:31156731:clu_28908:ENSG00000204536.13	651177	49	51	0.0836066	9.90717e-12	0.993862	0.139856	4.70829e-06	2.64029e-41	2.91044e-19	ENSG00000204536	coiled-coil alpha-helical rod protein 1 [Source:HGNC Symbol;Acc:HGNC:13930]	CCHCR1
rs1265947	6	31819390	0.85	0.96	C	T	0.06	0.04	0.02	0.08	1.4kb 3' of HSPA1A		rs1270942	5e-25	3.0494		chr6_31819390_C_T_b38	chr6:31151122:31156731:clu_28908:ENSG00000204536.13	661152	48	50	0.0819672	1.2153e-11	0.995788	0.140788	4.70829e-06	2.64029e-41	2.91044e-19	ENSG00000204536	coiled-coil alpha-helical rod protein 1 [Source:HGNC Symbol;Acc:HGNC:13930]	CCHCR1
rs144929896	6	31830357	0.87	0.96	TA	T	0.05	0.02	0	0.08	102bp 3' of HSPA1B		rs1270942	5e-25	3.0494		chr6_31830357_TA_T_b38	chr6:31151122:31156731:clu_28908:ENSG00000204536.13	672119	49	51	0.0836066	9.90717e-12	0.993862	0.139856	4.70829e-06	2.64029e-41	2.91044e-19	ENSG00000204536	coiled-coil alpha-helical rod protein 1 [Source:HGNC Symbol;Acc:HGNC:13930]	CCHCR1
rs3130476	6	31834324	0.87	0.96	C	T	0.05	0.02	0	0.08	283bp 5' of C6orf48		rs1270942	5e-25	3.0494		chr6_31834324_C_T_b38	chr6:31151122:31156731:clu_28908:ENSG00000204536.13	676086	49	51	0.0836066	9.90717e-12	0.993862	0.139856	4.70829e-06	2.64029e-41	2.91044e-19	ENSG00000204536	coiled-coil alpha-helical rod protein 1 [Source:HGNC Symbol;Acc:HGNC:13930]	CCHCR1
rs3130478	6	31838136	0.87	0.96	C	T	0.01	0.04	0	0.08	C6orf48	intronic	rs1270942	5e-25	3.0494		chr6_31838136_C_T_b38	chr6:31151122:31156731:clu_28908:ENSG00000204536.13	679898	47	49	0.0803279	1.80605e-11	1.00199	0.142979	4.70829e-06	2.64029e-41	2.91044e-19	ENSG00000204536	coiled-coil alpha-helical rod protein 1 [Source:HGNC Symbol;Acc:HGNC:13930]	CCHCR1
rs3130679	6	31839763	0.87	0.96	A	G	0	0.02	0	0.08	C6orf48	3'-UTR	rs1270942	5e-25	3.0494		chr6_31839763_A_G_b38	chr6:31151122:31156731:clu_28908:ENSG00000204536.13	681525	47	49	0.0803279	1.80605e-11	1.00199	0.142979	4.70829e-06	2.64029e-41	2.91044e-19	ENSG00000204536	coiled-coil alpha-helical rod protein 1 [Source:HGNC Symbol;Acc:HGNC:13930]	CCHCR1
rs599707	6	31840659	0.87	0.96	C	T	0.05	0.02	0	0.08	894bp 3' of C6orf48		rs1270942	5e-25	3.0494		chr6_31840659_C_T_b38	chr6:31151122:31156731:clu_28908:ENSG00000204536.13	682421	49	51	0.0836066	9.90717e-12	0.993862	0.139856	4.70829e-06	2.64029e-41	2.91044e-19	ENSG00000204536	coiled-coil alpha-helical rod protein 1 [Source:HGNC Symbol;Acc:HGNC:13930]	CCHCR1
rs9267574	6	31842835	0.87	0.96	C	A,T	0.05	0.02	0	0.08	3.1kb 3' of C6orf48		rs1270942	5e-25	3.0494		chr6_31842835_C_T_b38	chr6:31151122:31156731:clu_28908:ENSG00000204536.13	684597	49	51	0.0836066	9.90717e-12	0.993862	0.139856	4.70829e-06	2.64029e-41	2.91044e-19	ENSG00000204536	coiled-coil alpha-helical rod protein 1 [Source:HGNC Symbol;Acc:HGNC:13930]	CCHCR1
rs9267578	6	31850331	0.85	0.94	C	T	0.02	0.02	0	0.07	7.3kb 3' of NEU1		rs1270942	5e-25	3.0494		chr6_31850331_C_T_b38	chr6:31151122:31156731:clu_28908:ENSG00000204536.13	692093	47	49	0.0803279	1.80605e-11	1.00199	0.142979	4.70829e-06	2.64029e-41	2.91044e-19	ENSG00000204536	coiled-coil alpha-helical rod protein 1 [Source:HGNC Symbol;Acc:HGNC:13930]	CCHCR1
rs515688	6	31864261	0.87	0.96	A	G	0.06	0.03	0	0.08	SLC44A4	intronic	rs1270942	5e-25	3.0494		chr6_31864261_A_G_b38	chr6:31151122:31156731:clu_28908:ENSG00000204536.13	706023	49	51	0.0836066	9.90717e-12	0.993862	0.139856	4.70829e-06	2.64029e-41	2.91044e-19	ENSG00000204536	coiled-coil alpha-helical rod protein 1 [Source:HGNC Symbol;Acc:HGNC:13930]	CCHCR1
rs501942	6	31872700	0.91	0.98	C	T	0.05	0.02	0	0.08	SLC44A4	intronic	rs1270942	5e-25	3.0494		chr6_31872700_C_T_b38	chr6:31151122:31156731:clu_28908:ENSG00000204536.13	714462	49	51	0.0836066	9.90717e-12	0.993862	0.139856	4.70829e-06	2.64029e-41	2.91044e-19	ENSG00000204536	coiled-coil alpha-helical rod protein 1 [Source:HGNC Symbol;Acc:HGNC:13930]	CCHCR1
rs558702	6	31902549	0.92	0.98	G	A	0.07	0.02	0	0.07	C2	intronic	rs1270942	5e-25	3.0494		chr6_31902549_G_A_b38	chr6:31151122:31156731:clu_28908:ENSG00000204536.13	744311	49	51	0.0836066	9.90717e-12	0.993862	0.139856	4.70829e-06	2.64029e-41	2.91044e-19	ENSG00000204536	coiled-coil alpha-helical rod protein 1 [Source:HGNC Symbol;Acc:HGNC:13930]	CCHCR1
rs519417	6	31910656	0.94	0.98	G	A	0.06	0.02	0	0.07	C2	intronic	rs1270942	5e-25	3.0494		chr6_31910656_G_A_b38	chr6:31151122:31156731:clu_28908:ENSG00000204536.13	752418	49	51	0.0836066	9.90717e-12	0.993862	0.139856	4.70829e-06	2.64029e-41	2.91044e-19	ENSG00000204536	coiled-coil alpha-helical rod protein 1 [Source:HGNC Symbol;Acc:HGNC:13930]	CCHCR1
rs497309	6	31924707	0.98	1	A	C	0.05	0.02	0	0.07	C2	intronic	rs1270942	5e-25	3.0494		chr6_31924707_A_C_b38	chr6:31151122:31156731:clu_28908:ENSG00000204536.13	766469	48	50	0.0819672	3.94834e-12	1.01999	0.140586	4.70829e-06	2.64029e-41	2.91044e-19	ENSG00000204536	coiled-coil alpha-helical rod protein 1 [Source:HGNC Symbol;Acc:HGNC:13930]	CCHCR1
rs1265905	6	31942164	0.94	1	A	G	0.05	0.02	0	0.08	C2	intronic	rs1270942	5e-25	3.0494		chr6_31942164_A_G_b38	chr6:31151122:31156731:clu_28908:ENSG00000204536.13	783926	48	50	0.0819672	3.94834e-12	1.01999	0.140586	4.70829e-06	2.64029e-41	2.91044e-19	ENSG00000204536	coiled-coil alpha-helical rod protein 1 [Source:HGNC Symbol;Acc:HGNC:13930]	CCHCR1
rs1270942	6	31951083	1	1	A	G	0.05	0.02	0	0.07	CFB	intronic	rs1270942	5e-25	3.0494		chr6_31951083_A_G_b38	chr6:31151122:31156731:clu_28908:ENSG00000204536.13	792845	48	50	0.0819672	3.94834e-12	1.01999	0.140586	4.70829e-06	2.64029e-41	2.91044e-19	ENSG00000204536	coiled-coil alpha-helical rod protein 1 [Source:HGNC Symbol;Acc:HGNC:13930]	CCHCR1
rs389884	6	31973120	0.98	1	A	G	0.03	0.02	0	0.07	STK19	intronic	rs1270942	5e-25	3.0494		chr6_31973120_A_G_b38	chr6:31151122:31156731:clu_28908:ENSG00000204536.13	814882	47	49	0.0803279	5.64898e-13	1.06273	0.140503	4.70829e-06	2.64029e-41	2.91044e-19	ENSG00000204536	coiled-coil alpha-helical rod protein 1 [Source:HGNC Symbol;Acc:HGNC:13930]	CCHCR1
rs433061	6	32047051	0.91	0.98	G	A	0	0.03	0	0.08	TNXB	intronic	rs1270942	5e-25	3.0494		chr6_32047051_G_A_b38	chr6:31151122:31156731:clu_28908:ENSG00000204536.13	888813	45	47	0.0770492	1.0148e-12	1.07366	0.143697	4.70829e-06	2.64029e-41	2.91044e-19	ENSG00000204536	coiled-coil alpha-helical rod protein 1 [Source:HGNC Symbol;Acc:HGNC:13930]	CCHCR1
rs1150757	6	32061428	0.89	0.96	G	A	0	0.02	0	0.07	TNXB	synonymous	rs1270942	5e-25	3.0494		chr6_32061428_G_A_b38	chr6:31151122:31156731:clu_28908:ENSG00000204536.13	903190	45	47	0.0770492	1.0148e-12	1.07366	0.143697	4.70829e-06	2.64029e-41	2.91044e-19	ENSG00000204536	coiled-coil alpha-helical rod protein 1 [Source:HGNC Symbol;Acc:HGNC:13930]	CCHCR1
rs1150756	6	32067917	0.87	0.96	C	T	0	0.02	0	0.08	TNXB	synonymous	rs1270942	5e-25	3.0494		chr6_32067917_C_T_b38	chr6:31151122:31156731:clu_28908:ENSG00000204536.13	909679	45	47	0.0770492	1.0148e-12	1.07366	0.143697	4.70829e-06	2.64029e-41	2.91044e-19	ENSG00000204536	coiled-coil alpha-helical rod protein 1 [Source:HGNC Symbol;Acc:HGNC:13930]	CCHCR1
rs1150753	6	32092090	0.83	0.94	A	G	0	0.02	0	0.08	TNXB	intronic	rs1270942	5e-25	3.0494		chr6_32092090_A_G_b38	chr6:31151122:31156731:clu_28908:ENSG00000204536.13	933852	45	47	0.0770492	1.0148e-12	1.07366	0.143697	4.70829e-06	2.64029e-41	2.91044e-19	ENSG00000204536	coiled-coil alpha-helical rod protein 1 [Source:HGNC Symbol;Acc:HGNC:13930]	CCHCR1
rs1150752	6	32096949	0.83	0.94	T	C	0	0.02	0	0.08	TNXB	missense	rs1270942	5e-25	3.0494		chr6_32096949_T_C_b38	chr6:31151122:31156731:clu_28908:ENSG00000204536.13	938711	45	47	0.0770492	1.0148e-12	1.07366	0.143697	4.70829e-06	2.64029e-41	2.91044e-19	ENSG00000204536	coiled-coil alpha-helical rod protein 1 [Source:HGNC Symbol;Acc:HGNC:13930]	CCHCR1
rs1269852	6	32112414	0.8	0.92	G	C	0.01	0.02	0	0.08	TNXB		rs1270942	5e-25	3.0494		chr6_32112414_G_C_b38	chr6:31151122:31156731:clu_28908:ENSG00000204536.13	954176	45	47	0.0770492	1.0148e-12	1.07366	0.143697	4.70829e-06	2.64029e-41	2.91044e-19	ENSG00000204536	coiled-coil alpha-helical rod protein 1 [Source:HGNC Symbol;Acc:HGNC:13930]	CCHCR1
rs149299	16	28473820	0.9	0.97	T	C	0.03	0.38	0.12	0.35	RP11-435I10.4		rs4788084	3e-13	1.09	[1.02-1.16]	chr16_28473820_T_C_b38	chr16:28538155:28538526:clu_14274:ENSG00000176046.8	-65354	185	228	0.373771	6.96507e-08	-0.362835	0.0654903	1.39164e-05	1.52282e-18	1.93375e-10	ENSG00000176046	nuclear protein 1, transcriptional regulator [Source:HGNC Symbol;Acc:HGNC:29990]	NUPR1
rs151179	16	28475735	0.89	0.96	A	G	0.12	0.39	0.12	0.35	RP11-435I10.4		rs4788084	3e-13	1.09	[1.02-1.16]	chr16_28475735_A_G_b38	chr16:28538155:28538526:clu_14274:ENSG00000176046.8	-63439	190	234	0.383607	9.79877e-09	-0.378881	0.0640841	1.39164e-05	1.52282e-18	1.93375e-10	ENSG00000176046	nuclear protein 1, transcriptional regulator [Source:HGNC Symbol;Acc:HGNC:29990]	NUPR1
rs181195	16	28477048	0.9	0.97	A	T	0.03	0.38	0.12	0.35	RP11-435I10.4		rs4788084	3e-13	1.09	[1.02-1.16]	chr16_28477048_A_T_b38	chr16:28538155:28538526:clu_14274:ENSG00000176046.8	-62126	184	227	0.372131	3.70993e-08	-0.36817	0.0650281	1.39164e-05	1.52282e-18	1.93375e-10	ENSG00000176046	nuclear protein 1, transcriptional regulator [Source:HGNC Symbol;Acc:HGNC:29990]	NUPR1
rs151181	16	28479196	0.91	0.97	T	C	0.15	0.4	0.13	0.35	RP11-435I10.4	intronic	rs4788084	3e-13	1.09	[1.02-1.16]	chr16_28479196_T_C_b38	chr16:28538155:28538526:clu_14274:ENSG00000176046.8	-59978	189	233	0.381967	1.83428e-08	-0.371251	0.0640612	1.39164e-05	1.52282e-18	1.93375e-10	ENSG00000176046	nuclear protein 1, transcriptional regulator [Source:HGNC Symbol;Acc:HGNC:29990]	NUPR1
rs151303	16	28481189	0.91	0.97	C	A	0.12	0.39	0.12	0.35	RP11-435I10.4	intronic	rs4788084	3e-13	1.09	[1.02-1.16]	chr16_28481189_C_A_b38	chr16:28538155:28538526:clu_14274:ENSG00000176046.8	-57985	189	232	0.380328	1.17704e-08	-0.378579	0.0644037	1.39164e-05	1.52282e-18	1.93375e-10	ENSG00000176046	nuclear protein 1, transcriptional regulator [Source:HGNC Symbol;Acc:HGNC:29990]	NUPR1
rs151182	16	28484431	0.91	0.97	C	T	0.12	0.39	0.13	0.35	RP11-435I10.4	intronic	rs4788084	3e-13	1.09	[1.02-1.16]	chr16_28484431_C_T_b38	chr16:28538155:28538526:clu_14274:ENSG00000176046.8	-54743	190	233	0.381967	2.25756e-08	-0.372085	0.0646416	1.39164e-05	1.52282e-18	1.93375e-10	ENSG00000176046	nuclear protein 1, transcriptional regulator [Source:HGNC Symbol;Acc:HGNC:29990]	NUPR1
rs151301	16	28485738	0.91	0.97	T	A	0.12	0.39	0.12	0.35	RP11-435I10.4	intronic	rs4788084	3e-13	1.09	[1.02-1.16]	chr16_28485738_T_A_b38	chr16:28538155:28538526:clu_14274:ENSG00000176046.8	-53436	189	232	0.380328	1.17704e-08	-0.378579	0.0644037	1.39164e-05	1.52282e-18	1.93375e-10	ENSG00000176046	nuclear protein 1, transcriptional regulator [Source:HGNC Symbol;Acc:HGNC:29990]	NUPR1
rs34835	16	28487970	0.93	0.97	A	G	0.29	0.41	0.25	0.36	RP11-435I10.4	intronic	rs4788084	3e-13	1.09	[1.02-1.16]	chr16_28487970_A_G_b38	chr16:28538155:28538526:clu_14274:ENSG00000176046.8	-51204	200	247	0.404918	8.69704e-08	-0.354323	0.0644576	1.39164e-05	1.52282e-18	1.93375e-10	ENSG00000176046	nuclear protein 1, transcriptional regulator [Source:HGNC Symbol;Acc:HGNC:29990]	NUPR1
rs149271	16	28495551	0.92	0.97	A	G	0.35	0.35	0.11	0.36	CLN3	synonymous	rs4788084	3e-13	1.09	[1.02-1.16]	chr16_28495551_A_G_b38	chr16:28538155:28538526:clu_14274:ENSG00000176046.8	-43623	201	249	0.408197	1.97888e-11	-0.428454	0.0612697	1.39164e-05	1.52282e-18	1.93375e-10	ENSG00000176046	nuclear protein 1, transcriptional regulator [Source:HGNC Symbol;Acc:HGNC:29990]	NUPR1
rs180743	16	28496323	0.85	0.96	C	G	0.35	0.35	0.11	0.34	APOBR	missense	rs4788084	3e-13	1.09	[1.02-1.16]	chr16_28496323_C_G_b38	chr16:28538155:28538526:clu_14274:ENSG00000176046.8	-42851	201	249	0.408197	1.97888e-11	-0.428454	0.0612697	1.39164e-05	1.52282e-18	1.93375e-10	ENSG00000176046	nuclear protein 1, transcriptional regulator [Source:HGNC Symbol;Acc:HGNC:29990]	NUPR1
rs180744	16	28496727	0.92	0.97	A	G	0.43	0.35	0.11	0.36	APOBR	synonymous	rs4788084	3e-13	1.09	[1.02-1.16]	chr16_28496727_A_G_b38	chr16:28538155:28538526:clu_14274:ENSG00000176046.8	-42447	201	250	0.409836	2.6634e-11	-0.42426	0.0610985	1.39164e-05	1.52282e-18	1.93375e-10	ENSG00000176046	nuclear protein 1, transcriptional regulator [Source:HGNC Symbol;Acc:HGNC:29990]	NUPR1
rs151174	16	28496748	0.93	0.98	C	T	0.21	0.33	0.11	0.35	APOBR	synonymous	rs4788084	3e-13	1.09	[1.02-1.16]	chr16_28496748_C_T_b38	chr16:28538155:28538526:clu_14274:ENSG00000176046.8	-42426	191	230	0.377049	8.49142e-10	-0.409743	0.0644903	1.39164e-05	1.52282e-18	1.93375e-10	ENSG00000176046	nuclear protein 1, transcriptional regulator [Source:HGNC Symbol;Acc:HGNC:29990]	NUPR1
rs40831	16	28497126	0.87	0.95	A	G	0.54	0.43	0.32	0.37	APOBR	synonymous	rs4788084	3e-13	1.09	[1.02-1.16]	chr16_28497126_A_G_b38	chr16:28538155:28538526:clu_14274:ENSG00000176046.8	-42048	211	273	0.447541	1.09918e-11	-0.425166	0.0599724	1.39164e-05	1.52282e-18	1.93375e-10	ENSG00000176046	nuclear protein 1, transcriptional regulator [Source:HGNC Symbol;Acc:HGNC:29990]	NUPR1
rs40834	16	28499072	0.8	0.98	C	T	0.42	0.48	0.34	0.41	101bp 3' of APOBR		rs4788084	3e-13	1.09	[1.02-1.16]	chr16_28499072_C_T_b38	chr16:28538155:28538526:clu_14274:ENSG00000176046.8	-40102	214	282	0.462295	2.43994e-10	-0.391016	0.0595118	1.39164e-05	1.52282e-18	1.93375e-10	ENSG00000176046	nuclear protein 1, transcriptional regulator [Source:HGNC Symbol;Acc:HGNC:29990]	NUPR1
rs26528	16	28506388	0.82	0.99	T	C	0.35	0.5	0.36	0.41	IL27	intronic	rs4788084	3e-13	1.09	[1.02-1.16]	chr16_28506388_T_C_b38	chr16:28538155:28538526:clu_14274:ENSG00000176046.8	-32786	213	279	0.457377	4.04194e-11	-0.409201	0.0595236	1.39164e-05	1.52282e-18	1.93375e-10	ENSG00000176046	nuclear protein 1, transcriptional regulator [Source:HGNC Symbol;Acc:HGNC:29990]	NUPR1
rs153109	16	28507775	0.82	0.99	T	C	0.35	0.5	0.36	0.41	IL27		rs4788084	3e-13	1.09	[1.02-1.16]	chr16_28507775_T_C_b38	chr16:28538155:28538526:clu_14274:ENSG00000176046.8	-31399	213	279	0.457377	4.04194e-11	-0.409201	0.0595236	1.39164e-05	1.52282e-18	1.93375e-10	ENSG00000176046	nuclear protein 1, transcriptional regulator [Source:HGNC Symbol;Acc:HGNC:29990]	NUPR1
rs240707	16	28513291	0.83	0.99	C	G	0.37	0.51	0.36	0.4	1.2kb 5' of IL27		rs4788084	3e-13	1.09	[1.02-1.16]	chr16_28513291_C_G_b38	chr16:28538155:28538526:clu_14274:ENSG00000176046.8	-25883	214	281	0.460656	1.02705e-11	-0.41989	0.0591358	1.39164e-05	1.52282e-18	1.93375e-10	ENSG00000176046	nuclear protein 1, transcriptional regulator [Source:HGNC Symbol;Acc:HGNC:29990]	NUPR1
rs153111	16	28513402	0.83	1	C	T	0.38	0.51	0.35	0.41	1.4kb 5' of IL27		rs4788084	3e-13	1.09	[1.02-1.16]	chr16_28513402_C_T_b38	chr16:28538155:28538526:clu_14274:ENSG00000176046.8	-25772	213	279	0.457377	1.61787e-11	-0.416783	0.0593196	1.39164e-05	1.52282e-18	1.93375e-10	ENSG00000176046	nuclear protein 1, transcriptional regulator [Source:HGNC Symbol;Acc:HGNC:29990]	NUPR1
rs153106	16	28515576	0.99	1	T	C	0.26	0.41	0.26	0.36	3.5kb 5' of IL27		rs4788084	3e-13	1.09	[1.02-1.16]	chr16_28515576_T_C_b38	chr16:28538155:28538526:clu_14274:ENSG00000176046.8	-23598	193	243	0.398361	3.63626e-10	-0.39823	0.0612513	1.39164e-05	1.52282e-18	1.93375e-10	ENSG00000176046	nuclear protein 1, transcriptional regulator [Source:HGNC Symbol;Acc:HGNC:29990]	NUPR1
rs240705	16	28518395	0.98	0.99	C	T	0.26	0.41	0.26	0.36	6.3kb 5' of IL27		rs4788084	3e-13	1.09	[1.02-1.16]	chr16_28518395_C_T_b38	chr16:28538155:28538526:clu_14274:ENSG00000176046.8	-20779	193	244	0.4	5.56212e-10	-0.391112	0.0608479	1.39164e-05	1.52282e-18	1.93375e-10	ENSG00000176046	nuclear protein 1, transcriptional regulator [Source:HGNC Symbol;Acc:HGNC:29990]	NUPR1
rs240704	16	28518628	0.99	0.99	T	C	0.25	0.42	0.26	0.36	6.6kb 5' of IL27		rs4788084	3e-13	1.09	[1.02-1.16]	chr16_28518628_T_C_b38	chr16:28538155:28538526:clu_14274:ENSG00000176046.8	-20546	193	243	0.398361	7.06373e-10	-0.390757	0.0611906	1.39164e-05	1.52282e-18	1.93375e-10	ENSG00000176046	nuclear protein 1, transcriptional regulator [Source:HGNC Symbol;Acc:HGNC:29990]	NUPR1
rs4787458	16	28519966	0.89	0.99	A	G	0.02	0.31	0.1	0.34	7.9kb 5' of IL27		rs4788084	3e-13	1.09	[1.02-1.16]	chr16_28519966_A_G_b38	chr16:28538155:28538526:clu_14274:ENSG00000176046.8	-19208	171	209	0.342623	9.59767e-09	-0.382792	0.0647035	1.39164e-05	1.52282e-18	1.93375e-10	ENSG00000176046	nuclear protein 1, transcriptional regulator [Source:HGNC Symbol;Acc:HGNC:29990]	NUPR1
rs240702	16	28520032	0.99	1	C	T	0.26	0.41	0.26	0.36	8kb 5' of IL27		rs4788084	3e-13	1.09	[1.02-1.16]	chr16_28520032_C_T_b38	chr16:28538155:28538526:clu_14274:ENSG00000176046.8	-19142	193	244	0.4	5.56212e-10	-0.391112	0.0608479	1.39164e-05	1.52282e-18	1.93375e-10	ENSG00000176046	nuclear protein 1, transcriptional regulator [Source:HGNC Symbol;Acc:HGNC:29990]	NUPR1
rs62034319	16	28520867	0.99	1	T	G	0.25	0.41	0.26	0.36	8.8kb 5' of IL27		rs4788084	3e-13	1.09	[1.02-1.16]	chr16_28520867_T_G_b38	chr16:28538155:28538526:clu_14274:ENSG00000176046.8	-18307	193	244	0.4	1.16769e-09	-0.387336	0.0615079	1.39164e-05	1.52282e-18	1.93375e-10	ENSG00000176046	nuclear protein 1, transcriptional regulator [Source:HGNC Symbol;Acc:HGNC:29990]	NUPR1
rs28698667	16	28521750	0.99	1	C	T	0.23	0.41	0.27	0.36	9.7kb 5' of IL27		rs4788084	3e-13	1.09	[1.02-1.16]	chr16_28521750_C_T_b38	chr16:28538155:28538526:clu_14274:ENSG00000176046.8	-17424	191	239	0.391803	1.76233e-10	-0.409526	0.0618045	1.39164e-05	1.52282e-18	1.93375e-10	ENSG00000176046	nuclear protein 1, transcriptional regulator [Source:HGNC Symbol;Acc:HGNC:29990]	NUPR1
rs62034321	16	28522717	0.99	0.99	C	T	0.23	0.4	0.26	0.36	11kb 5' of IL27		rs4788084	3e-13	1.09	[1.02-1.16]	chr16_28522717_C_T_b38	chr16:28538155:28538526:clu_14274:ENSG00000176046.8	-16457	191	239	0.391803	1.76233e-10	-0.409526	0.0618045	1.39164e-05	1.52282e-18	1.93375e-10	ENSG00000176046	nuclear protein 1, transcriptional regulator [Source:HGNC Symbol;Acc:HGNC:29990]	NUPR1
rs4788085	16	28523682	0.99	1	A	G	0.32	0.42	0.26	0.36	12kb 5' of IL27		rs4788084	3e-13	1.09	[1.02-1.16]	chr16_28523682_A_G_b38	chr16:28538155:28538526:clu_14274:ENSG00000176046.8	-15492	196	247	0.404918	1.56997e-11	-0.42507	0.0604565	1.39164e-05	1.52282e-18	1.93375e-10	ENSG00000176046	nuclear protein 1, transcriptional regulator [Source:HGNC Symbol;Acc:HGNC:29990]	NUPR1
rs28772958	16	28523984	0.99	1	A	G	0.32	0.42	0.26	0.36	12kb 5' of IL27		rs4788084	3e-13	1.09	[1.02-1.16]	chr16_28523984_A_G_b38	chr16:28538155:28538526:clu_14274:ENSG00000176046.8	-15190	196	247	0.404918	1.56997e-11	-0.42507	0.0604565	1.39164e-05	1.52282e-18	1.93375e-10	ENSG00000176046	nuclear protein 1, transcriptional regulator [Source:HGNC Symbol;Acc:HGNC:29990]	NUPR1
rs62034322	16	28524513	0.9	0.99	G	A	0.21	0.32	0.1	0.34	12kb 5' of IL27		rs4788084	3e-13	1.09	[1.02-1.16]	chr16_28524513_G_A_b38	chr16:28538155:28538526:clu_14274:ENSG00000176046.8	-14661	178	219	0.359016	4.54067e-10	-0.401251	0.062084	1.39164e-05	1.52282e-18	1.93375e-10	ENSG00000176046	nuclear protein 1, transcriptional regulator [Source:HGNC Symbol;Acc:HGNC:29990]	NUPR1
rs62034323	16	28525152	0.99	1	C	T	0.22	0.41	0.26	0.36	12kb 3' of NUPR1		rs4788084	3e-13	1.09	[1.02-1.16]	chr16_28525152_C_T_b38	chr16:28538155:28538526:clu_14274:ENSG00000176046.8	-14022	191	239	0.391803	1.76233e-10	-0.409526	0.0618045	1.39164e-05	1.52282e-18	1.93375e-10	ENSG00000176046	nuclear protein 1, transcriptional regulator [Source:HGNC Symbol;Acc:HGNC:29990]	NUPR1
rs62034324	16	28525441	0.98	1	T	C	0.22	0.4	0.27	0.36	12kb 3' of NUPR1		rs4788084	3e-13	1.09	[1.02-1.16]	chr16_28525441_T_C_b38	chr16:28538155:28538526:clu_14274:ENSG00000176046.8	-13733	191	239	0.391803	1.76233e-10	-0.409526	0.0618045	1.39164e-05	1.52282e-18	1.93375e-10	ENSG00000176046	nuclear protein 1, transcriptional regulator [Source:HGNC Symbol;Acc:HGNC:29990]	NUPR1
rs2106480	16	28526650	1	1	T	C	0.32	0.42	0.26	0.36	11kb 3' of NUPR1		rs4788084	3e-13	1.09	[1.02-1.16]	chr16_28526650_T_C_b38	chr16:28538155:28538526:clu_14274:ENSG00000176046.8	-12524	196	247	0.404918	1.56997e-11	-0.42507	0.0604565	1.39164e-05	1.52282e-18	1.93375e-10	ENSG00000176046	nuclear protein 1, transcriptional regulator [Source:HGNC Symbol;Acc:HGNC:29990]	NUPR1
rs62034325	16	28527319	0.91	1	A	G	0.22	0.32	0.1	0.34	10kb 3' of NUPR1		rs4788084	3e-13	1.09	[1.02-1.16]	chr16_28527319_A_G_b38	chr16:28538155:28538526:clu_14274:ENSG00000176046.8	-11855	177	217	0.355738	5.33868e-10	-0.401637	0.0624159	1.39164e-05	1.52282e-18	1.93375e-10	ENSG00000176046	nuclear protein 1, transcriptional regulator [Source:HGNC Symbol;Acc:HGNC:29990]	NUPR1
rs62034326	16	28527972	0.99	1	A	G	0.22	0.4	0.26	0.36	9.3kb 3' of NUPR1		rs4788084	3e-13	1.09	[1.02-1.16]	chr16_28527972_A_G_b38	chr16:28538155:28538526:clu_14274:ENSG00000176046.8	-11202	191	239	0.391803	1.76233e-10	-0.409526	0.0618045	1.39164e-05	1.52282e-18	1.93375e-10	ENSG00000176046	nuclear protein 1, transcriptional regulator [Source:HGNC Symbol;Acc:HGNC:29990]	NUPR1
rs4788084	16	28528527	1	1	C	T	0.22	0.4	0.26	0.36	8.8kb 3' of NUPR1		rs4788084	3e-13	1.09	[1.02-1.16]	chr16_28528527_C_T_b38	chr16:28538155:28538526:clu_14274:ENSG00000176046.8	-10647	191	239	0.391803	1.76233e-10	-0.409526	0.0618045	1.39164e-05	1.52282e-18	1.93375e-10	ENSG00000176046	nuclear protein 1, transcriptional regulator [Source:HGNC Symbol;Acc:HGNC:29990]	NUPR1
rs8046271	16	28530073	1	1	T	C	0.21	0.41	0.27	0.36	7.2kb 3' of NUPR1		rs4788084	3e-13	1.09	[1.02-1.16]	chr16_28530073_T_C_b38	chr16:28538155:28538526:clu_14274:ENSG00000176046.8	-9101	191	239	0.391803	1.76233e-10	-0.409526	0.0618045	1.39164e-05	1.52282e-18	1.93375e-10	ENSG00000176046	nuclear protein 1, transcriptional regulator [Source:HGNC Symbol;Acc:HGNC:29990]	NUPR1
rs12446550	16	28532060	0.99	1	G	A	0.22	0.41	0.26	0.36	5.2kb 3' of NUPR1		rs4788084	3e-13	1.09	[1.02-1.16]	chr16_28532060_G_A_b38	chr16:28538155:28538526:clu_14274:ENSG00000176046.8	-7114	191	240	0.393443	6.64562e-11	-0.418138	0.0615688	1.39164e-05	1.52282e-18	1.93375e-10	ENSG00000176046	nuclear protein 1, transcriptional regulator [Source:HGNC Symbol;Acc:HGNC:29990]	NUPR1
rs4788083	16	28534128	0.99	1	A	G	0.29	0.42	0.26	0.36	3.2kb 3' of NUPR1		rs4788084	3e-13	1.09	[1.02-1.16]	chr16_28534128_A_G_b38	chr16:28538155:28538526:clu_14274:ENSG00000176046.8	-5046	196	247	0.404918	5.96714e-12	-0.43379	0.0603438	1.39164e-05	1.52282e-18	1.93375e-10	ENSG00000176046	nuclear protein 1, transcriptional regulator [Source:HGNC Symbol;Acc:HGNC:29990]	NUPR1
rs3785354	16	28539346	0.81	0.96	C	T	0.22	0.31	0.09	0.33	171bp 5' of NUPR1		rs4788084	3e-13	1.09	[1.02-1.16]	chr16_28539346_C_T_b38	chr16:28538155:28538526:clu_14274:ENSG00000176046.8	172	172	209	0.342623	4.19863e-10	-0.40806	0.0630048	1.39164e-05	1.52282e-18	1.93375e-10	ENSG00000176046	nuclear protein 1, transcriptional regulator [Source:HGNC Symbol;Acc:HGNC:29990]	NUPR1
rs1074631	16	28542787	0.8	0.96	G	A	0.11	0.31	0.09	0.33	3.6kb 5' of NUPR1		rs4788084	3e-13	1.09	[1.02-1.16]	chr16_28542787_G_A_b38	chr16:28538155:28538526:clu_14274:ENSG00000176046.8	3613	170	205	0.336066	2.23072e-09	-0.399657	0.0646486	1.39164e-05	1.52282e-18	1.93375e-10	ENSG00000176046	nuclear protein 1, transcriptional regulator [Source:HGNC Symbol;Acc:HGNC:29990]	NUPR1
rs9926245	16	28544385	0.89	0.95	T	A	0.3	0.42	0.26	0.36	5.2kb 5' of NUPR1		rs4788084	3e-13	1.09	[1.02-1.16]	chr16_28544385_T_A_b38	chr16:28538155:28538526:clu_14274:ENSG00000176046.8	5211	193	244	0.4	4.28632e-12	-0.435491	0.0601338	1.39164e-05	1.52282e-18	1.93375e-10	ENSG00000176046	nuclear protein 1, transcriptional regulator [Source:HGNC Symbol;Acc:HGNC:29990]	NUPR1
rs13331170	16	28550661	0.89	0.94	T	C	0.33	0.42	0.26	0.36	3.3kb 5' of CCDC101		rs4788084	3e-13	1.09	[1.02-1.16]	chr16_28550661_T_C_b38	chr16:28538155:28538526:clu_14274:ENSG00000176046.8	11487	193	246	0.403279	2.6668e-11	-0.415024	0.0597702	1.39164e-05	1.52282e-18	1.93375e-10	ENSG00000176046	nuclear protein 1, transcriptional regulator [Source:HGNC Symbol;Acc:HGNC:29990]	NUPR1
rs7191618	16	28554346	0.89	0.94	C	G	0.34	0.43	0.26	0.36	CCDC101	intronic	rs4788084	3e-13	1.09	[1.02-1.16]	chr16_28554346_C_G_b38	chr16:28538155:28538526:clu_14274:ENSG00000176046.8	15172	194	247	0.404918	4.12253e-11	-0.411666	0.0599109	1.39164e-05	1.52282e-18	1.93375e-10	ENSG00000176046	nuclear protein 1, transcriptional regulator [Source:HGNC Symbol;Acc:HGNC:29990]	NUPR1
rs3859172	16	28554837	0.89	0.94	G	T	0.34	0.43	0.26	0.36	CCDC101	intronic	rs4788084	3e-13	1.09	[1.02-1.16]	chr16_28554837_G_T_b38	chr16:28538155:28538526:clu_14274:ENSG00000176046.8	15663	194	247	0.404918	4.12253e-11	-0.411666	0.0599109	1.39164e-05	1.52282e-18	1.93375e-10	ENSG00000176046	nuclear protein 1, transcriptional regulator [Source:HGNC Symbol;Acc:HGNC:29990]	NUPR1
rs4788076	16	28558684	0.8	0.96	C	T	0.23	0.31	0.09	0.33	CCDC101	intronic	rs4788084	3e-13	1.09	[1.02-1.16]	chr16_28558684_C_T_b38	chr16:28538155:28538526:clu_14274:ENSG00000176046.8	19510	172	209	0.342623	4.19863e-10	-0.40806	0.0630048	1.39164e-05	1.52282e-18	1.93375e-10	ENSG00000176046	nuclear protein 1, transcriptional regulator [Source:HGNC Symbol;Acc:HGNC:29990]	NUPR1
rs772920	12	55996580	0.81	0.92	C	G	0.06	0.26	0.26	0.32	599bp 5' of SUOX	3'-UTR	rs1701704	9e-10	1.25	[1.12-1.40]	chr12_55996580_C_G_b38	chr12:55997339:56002212:clu_3525:ENSG00000139531.12	-600	161	194	0.318033	1.67829e-06	0.432106	0.088311	4.02378e-06	7.5471e-09	0.000609558	ENSG00000139531	sulfite oxidase [Source:HGNC Symbol;Acc:HGNC:11460]	SUOX
rs705702	12	55996852	0.81	0.92	A	G	0.06	0.26	0.26	0.32	327bp 5' of SUOX		rs1701704	9e-10	1.25	[1.12-1.40]	chr12_55996852_A_G_b38	chr12:55997339:56002212:clu_3525:ENSG00000139531.12	-328	161	194	0.318033	1.67829e-06	0.432106	0.088311	4.02378e-06	7.5471e-09	0.000609558	ENSG00000139531	sulfite oxidase [Source:HGNC Symbol;Acc:HGNC:11460]	SUOX
rs1689510	12	56002984	0.92	0.96	G	C	0.09	0.25	0.25	0.33	SUOX	intronic	rs1701704	9e-10	1.25	[1.12-1.40]	chr12_56002984_G_C_b38	chr12:55997339:56002212:clu_3525:ENSG00000139531.12	5804	161	192	0.314754	3.34057e-06	0.422329	0.0890199	4.02378e-06	7.5471e-09	0.000609558	ENSG00000139531	sulfite oxidase [Source:HGNC Symbol;Acc:HGNC:11460]	SUOX
rs34233420	17	39848676	0.85	0.94	GATTT	G	0.17	0.37	0.31	0.49	IKZF3	intronic	rs2872507	2e-06	1.1	[NR]	chr17_39848676_GATTT_G_b38	chr17:39676755:39684597:clu_11371:ENSG00000161395.13	151879	202	252	0.413115	1.41956e-08	0.432417	0.0740024	2.79387e-06	3.64233e-17	1.80836e-12	ENSG00000161395	post-GPI attachment to proteins phospholipase 3 [Source:HGNC Symbol;Acc:HGNC:23719]	PGAP3
rs1453559	17	39864166	0.81	0.99	T	C	0.63	0.44	0.31	0.53	IKZF3	5'-UTR	rs2872507	2e-06	1.1	[NR]	chr17_39864166_T_C_b38	chr17:39676755:39684597:clu_11371:ENSG00000161395.13	167369	223	297	0.486885	3.28933e-08	0.408756	0.0719047	2.79387e-06	3.64233e-17	1.80836e-12	ENSG00000161395	post-GPI attachment to proteins phospholipase 3 [Source:HGNC Symbol;Acc:HGNC:23719]	PGAP3
rs4795397	17	39867492	0.96	0.99	A	G	0.19	0.37	0.31	0.49	671bp 5' of ZPBP2		rs2872507	2e-06	1.1	[NR]	chr17_39867492_A_G_b38	chr17:39676755:39684597:clu_11371:ENSG00000161395.13	170695	202	252	0.415842	3.93684e-08	0.421527	0.074602	2.79387e-06	3.64233e-17	1.80836e-12	ENSG00000161395	post-GPI attachment to proteins phospholipase 3 [Source:HGNC Symbol;Acc:HGNC:23719]	PGAP3
rs11557466	17	39868373	0.99	0.99	C	T	0.12	0.35	0.31	0.48	ZPBP2	synonymous	rs2872507	2e-06	1.1	[NR]	chr17_39868373_C_T_b38	chr17:39676755:39684597:clu_11371:ENSG00000161395.13	171576	196	246	0.403279	1.43444e-08	0.434258	0.0743422	2.79387e-06	3.64233e-17	1.80836e-12	ENSG00000161395	post-GPI attachment to proteins phospholipase 3 [Source:HGNC Symbol;Acc:HGNC:23719]	PGAP3
rs11078925	17	39868955	0.98	0.99	T	C	0.12	0.35	0.31	0.48	ZPBP2	intronic	rs2872507	2e-06	1.1	[NR]	chr17_39868955_T_C_b38	chr17:39676755:39684597:clu_11371:ENSG00000161395.13	172158	196	246	0.403279	1.43444e-08	0.434258	0.0743422	2.79387e-06	3.64233e-17	1.80836e-12	ENSG00000161395	post-GPI attachment to proteins phospholipase 3 [Source:HGNC Symbol;Acc:HGNC:23719]	PGAP3
rs34120102	17	39869782	0.98	0.99	G	A	0.11	0.35	0.31	0.48	ZPBP2	intronic	rs2872507	2e-06	1.1	[NR]	chr17_39869782_G_A_b38	chr17:39676755:39684597:clu_11371:ENSG00000161395.13	172985	196	246	0.403279	1.43444e-08	0.434258	0.0743422	2.79387e-06	3.64233e-17	1.80836e-12	ENSG00000161395	post-GPI attachment to proteins phospholipase 3 [Source:HGNC Symbol;Acc:HGNC:23719]	PGAP3
rs11655198	17	39869916	0.83	0.98	C	T	0.26	0.39	0.31	0.52	ZPBP2	intronic	rs2872507	2e-06	1.1	[NR]	chr17_39869916_C_T_b38	chr17:39676755:39684597:clu_11371:ENSG00000161395.13	173119	217	288	0.472131	1.6628e-09	0.434066	0.0696228	2.79387e-06	3.64233e-17	1.80836e-12	ENSG00000161395	post-GPI attachment to proteins phospholipase 3 [Source:HGNC Symbol;Acc:HGNC:23719]	PGAP3
rs11650661	17	39870033	0.86	1	A	T	0.26	0.39	0.31	0.52	ZPBP2	intronic	rs2872507	2e-06	1.1	[NR]	chr17_39870033_A_T_b38	chr17:39676755:39684597:clu_11371:ENSG00000161395.13	173236	217	288	0.472131	1.6628e-09	0.434066	0.0696228	2.79387e-06	3.64233e-17	1.80836e-12	ENSG00000161395	post-GPI attachment to proteins phospholipase 3 [Source:HGNC Symbol;Acc:HGNC:23719]	PGAP3
rs11655292	17	39870108	0.85	0.99	C	G	0.26	0.39	0.31	0.52	ZPBP2	intronic	rs2872507	2e-06	1.1	[NR]	chr17_39870108_C_G_b38	chr17:39676755:39684597:clu_11371:ENSG00000161395.13	173311	217	288	0.472131	1.6628e-09	0.434066	0.0696228	2.79387e-06	3.64233e-17	1.80836e-12	ENSG00000161395	post-GPI attachment to proteins phospholipase 3 [Source:HGNC Symbol;Acc:HGNC:23719]	PGAP3
rs12709365	17	39871147	1	1	A	G	0.25	0.36	0.31	0.48	ZPBP2	intronic	rs2872507	2e-06	1.1	[NR]	chr17_39871147_A_G_b38	chr17:39676755:39684597:clu_11371:ENSG00000161395.13	174350	203	263	0.431148	2.73116e-09	0.42928	0.0698517	2.79387e-06	3.64233e-17	1.80836e-12	ENSG00000161395	post-GPI attachment to proteins phospholipase 3 [Source:HGNC Symbol;Acc:HGNC:23719]	PGAP3
rs13380815	17	39871330	1	1	A	G	0.25	0.36	0.31	0.48	ZPBP2	intronic	rs2872507	2e-06	1.1	[NR]	chr17_39871330_A_G_b38	chr17:39676755:39684597:clu_11371:ENSG00000161395.13	174533	203	263	0.431148	2.73116e-09	0.42928	0.0698517	2.79387e-06	3.64233e-17	1.80836e-12	ENSG00000161395	post-GPI attachment to proteins phospholipase 3 [Source:HGNC Symbol;Acc:HGNC:23719]	PGAP3
rs11557467	17	39872381	0.86	1	G	T	0.35	0.4	0.31	0.52	ZPBP2	missense	rs2872507	2e-06	1.1	[NR]	chr17_39872381_G_T_b38	chr17:39676755:39684597:clu_11371:ENSG00000161395.13	175584	221	292	0.478689	3.51467e-09	0.429736	0.0704481	2.79387e-06	3.64233e-17	1.80836e-12	ENSG00000161395	post-GPI attachment to proteins phospholipase 3 [Source:HGNC Symbol;Acc:HGNC:23719]	PGAP3
rs12936231	17	39872867	0.83	1	C	G	0.56	0.43	0.31	0.53	ZPBP2	intronic	rs2872507	2e-06	1.1	[NR]	chr17_39872867_C_G_b38	chr17:39676755:39684597:clu_11371:ENSG00000161395.13	176070	225	301	0.493443	1.77944e-08	0.412797	0.0711602	2.79387e-06	3.64233e-17	1.80836e-12	ENSG00000161395	post-GPI attachment to proteins phospholipase 3 [Source:HGNC Symbol;Acc:HGNC:23719]	PGAP3
rs11870965	17	39873952	1	1	T	A	0.25	0.36	0.31	0.48	ZPBP2	intronic	rs2872507	2e-06	1.1	[NR]	chr17_39873952_T_A_b38	chr17:39676755:39684597:clu_11371:ENSG00000161395.13	177155	203	263	0.431148	2.73116e-09	0.42928	0.0698517	2.79387e-06	3.64233e-17	1.80836e-12	ENSG00000161395	post-GPI attachment to proteins phospholipase 3 [Source:HGNC Symbol;Acc:HGNC:23719]	PGAP3
rs9903250	17	39874777	0.86	1	G	A	0.27	0.4	0.31	0.52	ZPBP2	intronic	rs2872507	2e-06	1.1	[NR]	chr17_39874777_G_A_b38	chr17:39676755:39684597:clu_11371:ENSG00000161395.13	177980	217	288	0.472131	1.6628e-09	0.434066	0.0696228	2.79387e-06	3.64233e-17	1.80836e-12	ENSG00000161395	post-GPI attachment to proteins phospholipase 3 [Source:HGNC Symbol;Acc:HGNC:23719]	PGAP3
rs9905959	17	39874885	0.88	1	A	G	0.25	0.35	0.3	0.45	ZPBP2	intronic	rs2872507	2e-06	1.1	[NR]	chr17_39874885_A_G_b38	chr17:39676755:39684597:clu_11371:ENSG00000161395.13	178088	203	263	0.431148	2.73116e-09	0.42928	0.0698517	2.79387e-06	3.64233e-17	1.80836e-12	ENSG00000161395	post-GPI attachment to proteins phospholipase 3 [Source:HGNC Symbol;Acc:HGNC:23719]	PGAP3
rs10852935	17	39875421	1	1	C	T	0.12	0.35	0.31	0.48	ZPBP2	synonymous	rs2872507	2e-06	1.1	[NR]	chr17_39875421_C_T_b38	chr17:39676755:39684597:clu_11371:ENSG00000161395.13	178624	196	246	0.403279	1.43444e-08	0.434258	0.0743422	2.79387e-06	3.64233e-17	1.80836e-12	ENSG00000161395	post-GPI attachment to proteins phospholipase 3 [Source:HGNC Symbol;Acc:HGNC:23719]	PGAP3
rs10852936	17	39875461	0.99	1	C	T	0.25	0.36	0.31	0.48	ZPBP2	intronic	rs2872507	2e-06	1.1	[NR]	chr17_39875461_C_T_b38	chr17:39676755:39684597:clu_11371:ENSG00000161395.13	178664	203	263	0.431148	2.73116e-09	0.42928	0.0698517	2.79387e-06	3.64233e-17	1.80836e-12	ENSG00000161395	post-GPI attachment to proteins phospholipase 3 [Source:HGNC Symbol;Acc:HGNC:23719]	PGAP3
rs9891174	17	39875549	0.99	1	T	A	0.23	0.36	0.31	0.48	ZPBP2	intronic	rs2872507	2e-06	1.1	[NR]	chr17_39875549_T_A_b38	chr17:39676755:39684597:clu_11371:ENSG00000161395.13	178752	201	260	0.42623	1.65124e-09	0.435348	0.0698146	2.79387e-06	3.64233e-17	1.80836e-12	ENSG00000161395	post-GPI attachment to proteins phospholipase 3 [Source:HGNC Symbol;Acc:HGNC:23719]	PGAP3
rs34189114	17	39876207	1	1	C	T	0.12	0.35	0.31	0.48	ZPBP2	intronic	rs2872507	2e-06	1.1	[NR]	chr17_39876207_C_T_b38	chr17:39676755:39684597:clu_11371:ENSG00000161395.13	179410	196	246	0.403279	1.43444e-08	0.434258	0.0743422	2.79387e-06	3.64233e-17	1.80836e-12	ENSG00000161395	post-GPI attachment to proteins phospholipase 3 [Source:HGNC Symbol;Acc:HGNC:23719]	PGAP3
rs35736272	17	39876427	1	1	T	C	0.11	0.35	0.31	0.48	ZPBP2	intronic	rs2872507	2e-06	1.1	[NR]	chr17_39876427_T_C_b38	chr17:39676755:39684597:clu_11371:ENSG00000161395.13	179630	196	246	0.403279	1.43444e-08	0.434258	0.0743422	2.79387e-06	3.64233e-17	1.80836e-12	ENSG00000161395	post-GPI attachment to proteins phospholipase 3 [Source:HGNC Symbol;Acc:HGNC:23719]	PGAP3
rs9907088	17	39878863	1	1	G	A	0.24	0.36	0.31	0.48	966bp 3' of ZPBP2		rs2872507	2e-06	1.1	[NR]	chr17_39878863_G_A_b38	chr17:39676755:39684597:clu_11371:ENSG00000161395.13	182066	202	262	0.429508	3.86728e-09	0.425033	0.0698756	2.79387e-06	3.64233e-17	1.80836e-12	ENSG00000161395	post-GPI attachment to proteins phospholipase 3 [Source:HGNC Symbol;Acc:HGNC:23719]	PGAP3
rs36038753	17	39879117	1	1	G	T	0.24	0.36	0.32	0.48	1.2kb 3' of ZPBP2		rs2872507	2e-06	1.1	[NR]	chr17_39879117_G_T_b38	chr17:39676755:39684597:clu_11371:ENSG00000161395.13	182320	202	262	0.429508	3.86728e-09	0.425033	0.0698756	2.79387e-06	3.64233e-17	1.80836e-12	ENSG00000161395	post-GPI attachment to proteins phospholipase 3 [Source:HGNC Symbol;Acc:HGNC:23719]	PGAP3
rs35569035	17	39879371	0.99	1	C	T	0.12	0.35	0.31	0.48	1.5kb 3' of ZPBP2		rs2872507	2e-06	1.1	[NR]	chr17_39879371_C_T_b38	chr17:39676755:39684597:clu_11371:ENSG00000161395.13	182574	196	246	0.403279	1.43444e-08	0.434258	0.0743422	2.79387e-06	3.64233e-17	1.80836e-12	ENSG00000161395	post-GPI attachment to proteins phospholipase 3 [Source:HGNC Symbol;Acc:HGNC:23719]	PGAP3
rs9910826	17	39879395	0.95	1	A	G	0.23	0.35	0.31	0.47	1.5kb 3' of ZPBP2		rs2872507	2e-06	1.1	[NR]	chr17_39879395_A_G_b38	chr17:39676755:39684597:clu_11371:ENSG00000161395.13	182598	202	262	0.429508	3.86728e-09	0.425033	0.0698756	2.79387e-06	3.64233e-17	1.80836e-12	ENSG00000161395	post-GPI attachment to proteins phospholipase 3 [Source:HGNC Symbol;Acc:HGNC:23719]	PGAP3
rs34074973	17	39879513	1	1	GAGA	G	0.12	0.35	0.31	0.48	1.6kb 3' of ZPBP2		rs2872507	2e-06	1.1	[NR]	chr17_39879513_GAGA_G_b38	chr17:39676755:39684597:clu_11371:ENSG00000161395.13	182716	196	246	0.403279	1.43444e-08	0.434258	0.0743422	2.79387e-06	3.64233e-17	1.80836e-12	ENSG00000161395	post-GPI attachment to proteins phospholipase 3 [Source:HGNC Symbol;Acc:HGNC:23719]	PGAP3
rs9904624	17	39880333	1	1	A	G	0.23	0.36	0.31	0.48	2.4kb 3' of ZPBP2		rs2872507	2e-06	1.1	[NR]	chr17_39880333_A_G_b38	chr17:39676755:39684597:clu_11371:ENSG00000161395.13	183536	202	262	0.429508	3.86728e-09	0.425033	0.0698756	2.79387e-06	3.64233e-17	1.80836e-12	ENSG00000161395	post-GPI attachment to proteins phospholipase 3 [Source:HGNC Symbol;Acc:HGNC:23719]	PGAP3
rs4795398	17	39881926	0.97	1	C	T	0.12	0.34	0.31	0.47	4kb 3' of ZPBP2		rs2872507	2e-06	1.1	[NR]	chr17_39881926_C_T_b38	chr17:39676755:39684597:clu_11371:ENSG00000161395.13	185129	196	246	0.403279	1.43444e-08	0.434258	0.0743422	2.79387e-06	3.64233e-17	1.80836e-12	ENSG00000161395	post-GPI attachment to proteins phospholipase 3 [Source:HGNC Symbol;Acc:HGNC:23719]	PGAP3
rs12232497	17	39883866	1	1	T	C	0.11	0.35	0.31	0.48	6kb 3' of ZPBP2		rs2872507	2e-06	1.1	[NR]	chr17_39883866_T_C_b38	chr17:39676755:39684597:clu_11371:ENSG00000161395.13	187069	196	246	0.403279	1.43444e-08	0.434258	0.0743422	2.79387e-06	3.64233e-17	1.80836e-12	ENSG00000161395	post-GPI attachment to proteins phospholipase 3 [Source:HGNC Symbol;Acc:HGNC:23719]	PGAP3
rs12232498	17	39884110	1	1	T	C	0.24	0.36	0.31	0.48	6.2kb 3' of ZPBP2		rs2872507	2e-06	1.1	[NR]	chr17_39884110_T_C_b38	chr17:39676755:39684597:clu_11371:ENSG00000161395.13	187313	202	262	0.429508	3.86728e-09	0.425033	0.0698756	2.79387e-06	3.64233e-17	1.80836e-12	ENSG00000161395	post-GPI attachment to proteins phospholipase 3 [Source:HGNC Symbol;Acc:HGNC:23719]	PGAP3
rs12941333	17	39884281	1	1	C	T	0.24	0.36	0.31	0.48	6.4kb 3' of ZPBP2		rs2872507	2e-06	1.1	[NR]	chr17_39884281_C_T_b38	chr17:39676755:39684597:clu_11371:ENSG00000161395.13	187484	202	262	0.429508	3.86728e-09	0.425033	0.0698756	2.79387e-06	3.64233e-17	1.80836e-12	ENSG00000161395	post-GPI attachment to proteins phospholipase 3 [Source:HGNC Symbol;Acc:HGNC:23719]	PGAP3
rs2872507	17	39884510	1	1	G	A	0.24	0.36	0.31	0.48	6.6kb 3' of ZPBP2		rs2872507	2e-06	1.1	[NR]	chr17_39884510_G_A_b38	chr17:39676755:39684597:clu_11371:ENSG00000161395.13	187713	202	262	0.429508	3.86728e-09	0.425033	0.0698756	2.79387e-06	3.64233e-17	1.80836e-12	ENSG00000161395	post-GPI attachment to proteins phospholipase 3 [Source:HGNC Symbol;Acc:HGNC:23719]	PGAP3
rs9908132	17	39886524	0.86	1	T	A	0.37	0.4	0.31	0.52	8.6kb 3' of ZPBP2		rs2872507	2e-06	1.1	[NR]	chr17_39886524_T_A_b38	chr17:39676755:39684597:clu_11371:ENSG00000161395.13	189727	221	292	0.478689	3.51467e-09	0.429736	0.0704481	2.79387e-06	3.64233e-17	1.80836e-12	ENSG00000161395	post-GPI attachment to proteins phospholipase 3 [Source:HGNC Symbol;Acc:HGNC:23719]	PGAP3
rs9901146	17	39887090	0.86	1	G	A	0.37	0.4	0.31	0.52	9.2kb 3' of ZPBP2		rs2872507	2e-06	1.1	[NR]	chr17_39887090_G_A_b38	chr17:39676755:39684597:clu_11371:ENSG00000161395.13	190293	221	292	0.478689	3.51467e-09	0.429736	0.0704481	2.79387e-06	3.64233e-17	1.80836e-12	ENSG00000161395	post-GPI attachment to proteins phospholipase 3 [Source:HGNC Symbol;Acc:HGNC:23719]	PGAP3
rs12936409	17	39887396	0.99	1	C	A,G,T	0.12	0.36	0.31	0.48	9.5kb 3' of ZPBP2		rs2872507	2e-06	1.1	[NR]	chr17_39887396_C_T_b38	chr17:39676755:39684597:clu_11371:ENSG00000161395.13	190599	196	246	0.403279	1.43444e-08	0.434258	0.0743422	2.79387e-06	3.64233e-17	1.80836e-12	ENSG00000161395	post-GPI attachment to proteins phospholipase 3 [Source:HGNC Symbol;Acc:HGNC:23719]	PGAP3
rs12103884	17	39889472	0.86	1	C	T	0.37	0.4	0.31	0.52	12kb 3' of ZPBP2		rs2872507	2e-06	1.1	[NR]	chr17_39889472_C_T_b38	chr17:39676755:39684597:clu_11371:ENSG00000161395.13	192675	221	292	0.478689	3.51467e-09	0.429736	0.0704481	2.79387e-06	3.64233e-17	1.80836e-12	ENSG00000161395	post-GPI attachment to proteins phospholipase 3 [Source:HGNC Symbol;Acc:HGNC:23719]	PGAP3
rs9906951	17	39891991	0.83	0.97	T	C	0.4	0.4	0.31	0.51	13kb 3' of GSDMB		rs2872507	2e-06	1.1	[NR]	chr17_39891991_T_C_b38	chr17:39676755:39684597:clu_11371:ENSG00000161395.13	195194	222	294	0.481967	3.34947e-09	0.43006	0.0704006	2.79387e-06	3.64233e-17	1.80836e-12	ENSG00000161395	post-GPI attachment to proteins phospholipase 3 [Source:HGNC Symbol;Acc:HGNC:23719]	PGAP3
rs12950209	17	39892849	0.86	1	T	C	0.36	0.4	0.31	0.52	12kb 3' of GSDMB		rs2872507	2e-06	1.1	[NR]	chr17_39892849_T_C_b38	chr17:39676755:39684597:clu_11371:ENSG00000161395.13	196052	221	291	0.477049	3.93177e-09	0.43078	0.0708555	2.79387e-06	3.64233e-17	1.80836e-12	ENSG00000161395	post-GPI attachment to proteins phospholipase 3 [Source:HGNC Symbol;Acc:HGNC:23719]	PGAP3
rs12950743	17	39892980	0.86	1	T	C	0.37	0.4	0.31	0.52	12kb 3' of GSDMB		rs2872507	2e-06	1.1	[NR]	chr17_39892980_T_C_b38	chr17:39676755:39684597:clu_11371:ENSG00000161395.13	196183	221	292	0.478689	3.51467e-09	0.429736	0.0704481	2.79387e-06	3.64233e-17	1.80836e-12	ENSG00000161395	post-GPI attachment to proteins phospholipase 3 [Source:HGNC Symbol;Acc:HGNC:23719]	PGAP3
rs7359623	17	39893336	0.86	1	C	T	0.35	0.4	0.31	0.52	11kb 3' of GSDMB		rs2872507	2e-06	1.1	[NR]	chr17_39893336_C_T_b38	chr17:39676755:39684597:clu_11371:ENSG00000161395.13	196539	220	289	0.47377	2.29736e-09	0.437596	0.0708462	2.79387e-06	3.64233e-17	1.80836e-12	ENSG00000161395	post-GPI attachment to proteins phospholipase 3 [Source:HGNC Symbol;Acc:HGNC:23719]	PGAP3
rs8067378	17	39895095	0.83	1	A	G	0.54	0.43	0.31	0.53	9.5kb 3' of GSDMB		rs2872507	2e-06	1.1	[NR]	chr17_39895095_A_G_b38	chr17:39676755:39684597:clu_11371:ENSG00000161395.13	198298	226	302	0.495082	1.20683e-08	0.41839	0.0712328	2.79387e-06	3.64233e-17	1.80836e-12	ENSG00000161395	post-GPI attachment to proteins phospholipase 3 [Source:HGNC Symbol;Acc:HGNC:23719]	PGAP3
rs11651596	17	39899863	0.94	0.99	T	C	0.23	0.35	0.31	0.47	4.7kb 3' of GSDMB		rs2872507	2e-06	1.1	[NR]	chr17_39899863_T_C_b38	chr17:39676755:39684597:clu_11371:ENSG00000161395.13	203066	197	247	0.404918	4.43103e-08	0.418419	0.0743504	2.79387e-06	3.64233e-17	1.80836e-12	ENSG00000161395	post-GPI attachment to proteins phospholipase 3 [Source:HGNC Symbol;Acc:HGNC:23719]	PGAP3
rs12949100	17	39900936	0.95	0.99	G	A	0.11	0.35	0.31	0.47	3.7kb 3' of GSDMB		rs2872507	2e-06	1.1	[NR]	chr17_39900936_G_A_b38	chr17:39676755:39684597:clu_11371:ENSG00000161395.13	204139	193	242	0.396721	1.71073e-08	0.434916	0.0748778	2.79387e-06	3.64233e-17	1.80836e-12	ENSG00000161395	post-GPI attachment to proteins phospholipase 3 [Source:HGNC Symbol;Acc:HGNC:23719]	PGAP3
rs8069176	17	39900944	0.96	0.99	G	A	0.35	0.37	0.31	0.47	3.7kb 3' of GSDMB		rs2872507	2e-06	1.1	[NR]	chr17_39900944_G_A_b38	chr17:39676755:39684597:clu_11371:ENSG00000161395.13	204147	204	263	0.431148	7.86775e-09	0.420234	0.0705943	2.79387e-06	3.64233e-17	1.80836e-12	ENSG00000161395	post-GPI attachment to proteins phospholipase 3 [Source:HGNC Symbol;Acc:HGNC:23719]	PGAP3
rs4795399	17	39905186	0.96	0.99	T	C	0.11	0.35	0.31	0.47	GSDMB	intronic	rs2872507	2e-06	1.1	[NR]	chr17_39905186_T_C_b38	chr17:39676755:39684597:clu_11371:ENSG00000161395.13	208389	192	242	0.396721	1.1158e-08	0.436894	0.0741989	2.79387e-06	3.64233e-17	1.80836e-12	ENSG00000161395	post-GPI attachment to proteins phospholipase 3 [Source:HGNC Symbol;Acc:HGNC:23719]	PGAP3
rs2305480	17	39905943	0.96	0.99	G	A	0.11	0.35	0.31	0.47	GSDMB	missense	rs2872507	2e-06	1.1	[NR]	chr17_39905943_G_A_b38	chr17:39676755:39684597:clu_11371:ENSG00000161395.13	209146	192	242	0.396721	1.1158e-08	0.436894	0.0741989	2.79387e-06	3.64233e-17	1.80836e-12	ENSG00000161395	post-GPI attachment to proteins phospholipase 3 [Source:HGNC Symbol;Acc:HGNC:23719]	PGAP3
rs2305479	17	39905964	0.82	0.96	C	T	0.13	0.38	0.31	0.51	GSDMB	missense	rs2872507	2e-06	1.1	[NR]	chr17_39905964_C_T_b38	chr17:39676755:39684597:clu_11371:ENSG00000161395.13	209167	207	268	0.439344	6.68186e-09	0.43864	0.0733159	2.79387e-06	3.64233e-17	1.80836e-12	ENSG00000161395	post-GPI attachment to proteins phospholipase 3 [Source:HGNC Symbol;Acc:HGNC:23719]	PGAP3
rs56750287	17	39906691	0.96	0.99	A	C	0.12	0.34	0.31	0.47	GSDMB	intronic	rs2872507	2e-06	1.1	[NR]	chr17_39906691_A_C_b38	chr17:39676755:39684597:clu_11371:ENSG00000161395.13	209894	193	243	0.398361	8.11043e-09	0.44076	0.0741121	2.79387e-06	3.64233e-17	1.80836e-12	ENSG00000161395	post-GPI attachment to proteins phospholipase 3 [Source:HGNC Symbol;Acc:HGNC:23719]	PGAP3
rs11078926	17	39906723	0.95	0.99	G	A	0.11	0.34	0.31	0.47	GSDMB	intronic	rs2872507	2e-06	1.1	[NR]	chr17_39906723_G_A_b38	chr17:39676755:39684597:clu_11371:ENSG00000161395.13	209926	192	242	0.396721	1.1158e-08	0.436894	0.0741989	2.79387e-06	3.64233e-17	1.80836e-12	ENSG00000161395	post-GPI attachment to proteins phospholipase 3 [Source:HGNC Symbol;Acc:HGNC:23719]	PGAP3
rs883770	17	39907128	0.82	0.96	C	T	0.13	0.37	0.31	0.51	GSDMB	intronic	rs2872507	2e-06	1.1	[NR]	chr17_39907128_C_T_b38	chr17:39676755:39684597:clu_11371:ENSG00000161395.13	210331	207	268	0.439344	6.68186e-09	0.43864	0.0733159	2.79387e-06	3.64233e-17	1.80836e-12	ENSG00000161395	post-GPI attachment to proteins phospholipase 3 [Source:HGNC Symbol;Acc:HGNC:23719]	PGAP3
rs62067034	17	39907485	0.81	0.95	C	T	0.13	0.37	0.31	0.51	GSDMB	intronic	rs2872507	2e-06	1.1	[NR]	chr17_39907485_C_T_b38	chr17:39676755:39684597:clu_11371:ENSG00000161395.13	210688	207	268	0.439344	6.68186e-09	0.43864	0.0733159	2.79387e-06	3.64233e-17	1.80836e-12	ENSG00000161395	post-GPI attachment to proteins phospholipase 3 [Source:HGNC Symbol;Acc:HGNC:23719]	PGAP3
rs36000226	17	39907676	0.82	0.96	T	C	0.13	0.37	0.31	0.51	GSDMB	intronic	rs2872507	2e-06	1.1	[NR]	chr17_39907676_T_C_b38	chr17:39676755:39684597:clu_11371:ENSG00000161395.13	210879	207	268	0.439344	6.68186e-09	0.43864	0.0733159	2.79387e-06	3.64233e-17	1.80836e-12	ENSG00000161395	post-GPI attachment to proteins phospholipase 3 [Source:HGNC Symbol;Acc:HGNC:23719]	PGAP3
rs11078927	17	39908152	0.95	0.99	C	T	0.11	0.34	0.31	0.47	GSDMB	intronic	rs2872507	2e-06	1.1	[NR]	chr17_39908152_C_T_b38	chr17:39676755:39684597:clu_11371:ENSG00000161395.13	211355	192	241	0.395082	1.49115e-08	0.43576	0.0746921	2.79387e-06	3.64233e-17	1.80836e-12	ENSG00000161395	post-GPI attachment to proteins phospholipase 3 [Source:HGNC Symbol;Acc:HGNC:23719]	PGAP3
rs11078928	17	39908216	0.95	0.99	T	C	0.1	0.34	0.31	0.47	GSDMB	splice donor	rs2872507	2e-06	1.1	[NR]	chr17_39908216_T_C_b38	chr17:39676755:39684597:clu_11371:ENSG00000161395.13	211419	192	241	0.395082	1.49115e-08	0.43576	0.0746921	2.79387e-06	3.64233e-17	1.80836e-12	ENSG00000161395	post-GPI attachment to proteins phospholipase 3 [Source:HGNC Symbol;Acc:HGNC:23719]	PGAP3
rs12939832	17	39908623	0.94	0.99	G	A	0.1	0.34	0.31	0.47	GSDMB	intronic	rs2872507	2e-06	1.1	[NR]	chr17_39908623_G_A_b38	chr17:39676755:39684597:clu_11371:ENSG00000161395.13	211826	192	241	0.395082	1.49115e-08	0.43576	0.0746921	2.79387e-06	3.64233e-17	1.80836e-12	ENSG00000161395	post-GPI attachment to proteins phospholipase 3 [Source:HGNC Symbol;Acc:HGNC:23719]	PGAP3
rs4795400	17	39910767	0.88	0.96	C	T	0.12	0.35	0.32	0.47	GSDMB	intronic	rs2872507	2e-06	1.1	[NR]	chr17_39910767_C_T_b38	chr17:39676755:39684597:clu_11371:ENSG00000161395.13	213970	194	245	0.401639	1.07933e-08	0.432679	0.073406	2.79387e-06	3.64233e-17	1.80836e-12	ENSG00000161395	post-GPI attachment to proteins phospholipase 3 [Source:HGNC Symbol;Acc:HGNC:23719]	PGAP3
rs9303279	17	39917715	0.8	-0.9	G	C	0.89	0.65	0.68	0.52	GSDMB	intronic	rs2872507	2e-06	1.1	[NR]	chr17_39917715_G_C_b38	chr17:39676755:39684597:clu_11371:ENSG00000161395.13	220918	193	243	0.398361	5.7042e-08	-0.419134	0.0751272	2.79387e-06	3.64233e-17	1.80836e-12	ENSG00000161395	post-GPI attachment to proteins phospholipase 3 [Source:HGNC Symbol;Acc:HGNC:23719]	PGAP3
rs8176719	9	133257521	0.94	0.98	T	TC	0.27	0.24	0.42	0.39	ABO		rs657152	1e-13	2.94	[2.13-4.00]	chr9_133257521_T_TC_b38	chr9:133259866:133261318:clu_48097:ENSG00000175164.13	-17693	184	219	0.359016	1.53434e-07	0.486327	0.0903088	2.64799e-06	1.37875e-09	4.20621e-05	ENSG00000175164	ABO, alpha 1-3-N-acetylgalactosaminyltransferase and alpha 1-3-galactosyltransferase [Source:HGNC Symbol;Acc:HGNC:79]	ABO
rs687621	9	133261662	0.88	0.99	A	G	0.41	0.24	0.43	0.37	ABO	intronic	rs657152	1e-13	2.94	[2.13-4.00]	chr9_133261662_G_A_b38	chr9:133259866:133261318:clu_48097:ENSG00000175164.13	-13552	190	227	0.372131	1.7889e-08	-0.5138	0.0885868	2.64799e-06	1.37875e-09	4.20621e-05	ENSG00000175164	ABO, alpha 1-3-N-acetylgalactosaminyltransferase and alpha 1-3-galactosyltransferase [Source:HGNC Symbol;Acc:HGNC:79]	ABO
rs687289	9	133261703	0.87	0.99	G	A	0.39	0.24	0.42	0.37	ABO	intronic	rs657152	1e-13	2.94	[2.13-4.00]	chr9_133261703_A_G_b38	chr9:133259866:133261318:clu_48097:ENSG00000175164.13	-13511	188	222	0.363934	1.40472e-07	-0.485192	0.0898061	2.64799e-06	1.37875e-09	4.20621e-05	ENSG00000175164	ABO, alpha 1-3-N-acetylgalactosaminyltransferase and alpha 1-3-galactosyltransferase [Source:HGNC Symbol;Acc:HGNC:79]	ABO
rs657152	9	133263862	1	1	C	A	0.43	0.26	0.41	0.4	ABO	intronic	rs657152	1e-13	2.94	[2.13-4.00]	chr9_133263862_A_C_b38	chr9:133259866:133261318:clu_48097:ENSG00000175164.13	-11352	199	239	0.391803	1.672e-09	-0.549836	0.0882059	2.64799e-06	1.37875e-09	4.20621e-05	ENSG00000175164	ABO, alpha 1-3-N-acetylgalactosaminyltransferase and alpha 1-3-galactosyltransferase [Source:HGNC Symbol;Acc:HGNC:79]	ABO
rs514659	9	133266790	0.89	1	A	C	0.44	0.23	0.42	0.37	ABO	intronic	rs657152	1e-13	2.94	[2.13-4.00]	chr9_133266790_C_A_b38	chr9:133259866:133261318:clu_48097:ENSG00000175164.13	-8424	192	227	0.372131	1.1418e-08	-0.526092	0.0894127	2.64799e-06	1.37875e-09	4.20621e-05	ENSG00000175164	ABO, alpha 1-3-N-acetylgalactosaminyltransferase and alpha 1-3-galactosyltransferase [Source:HGNC Symbol;Acc:HGNC:79]	ABO
rs644234	9	133266804	1	1	T	G	0.44	0.25	0.42	0.4	ABO	intronic	rs657152	1e-13	2.94	[2.13-4.00]	chr9_133266804_G_T_b38	chr9:133259866:133261318:clu_48097:ENSG00000175164.13	-8410	201	241	0.395082	1.37875e-09	-0.556058	0.0887156	2.64799e-06	1.37875e-09	4.20621e-05	ENSG00000175164	ABO, alpha 1-3-N-acetylgalactosaminyltransferase and alpha 1-3-galactosyltransferase [Source:HGNC Symbol;Acc:HGNC:79]	ABO
rs643434	9	133266942	1	1	G	A	0.45	0.25	0.42	0.4	ABO	intronic	rs657152	1e-13	2.94	[2.13-4.00]	chr9_133266942_A_G_b38	chr9:133259866:133261318:clu_48097:ENSG00000175164.13	-8272	201	241	0.395082	1.37875e-09	-0.556058	0.0887156	2.64799e-06	1.37875e-09	4.20621e-05	ENSG00000175164	ABO, alpha 1-3-N-acetylgalactosaminyltransferase and alpha 1-3-galactosyltransferase [Source:HGNC Symbol;Acc:HGNC:79]	ABO
rs613534	9	133267707	0.93	1	A	G	0.42	0.24	0.41	0.38	ABO	intronic	rs657152	1e-13	2.94	[2.13-4.00]	chr9_133267707_G_A_b38	chr9:133259866:133261318:clu_48097:ENSG00000175164.13	-7507	201	241	0.395082	1.37875e-09	-0.556058	0.0887156	2.64799e-06	1.37875e-09	4.20621e-05	ENSG00000175164	ABO, alpha 1-3-N-acetylgalactosaminyltransferase and alpha 1-3-galactosyltransferase [Source:HGNC Symbol;Acc:HGNC:79]	ABO
[truncated: 272 more rows]

## Sheet: Supple Table 7_description
Header name	Header description
variant	variant rsID
Chr	chromosome (variant)
pos.hg38.	position hg38 (variant)
[truncated: 29 more rows]

## Sheet: Supple Table 8_MHCII
GeneID	GeneSymbol	GENENAME	Chr	Strand	PValue	FDR	IncLevel_Cyto	IncLevel_Cont	IncLevelDifference_CytovsCont
[truncated: 98 more rows]
